# Supplementary material for: Ultra-streamlined single cell proteomics by all-in-one chip and data-independent-acquisition mass spectrometry
Source: Research Square preprint supplement (doi:10.21203/rs.3.rs-138178/v1), 2021-01-27
Supplement: Supplementary file 1 [file 242013291fc7c2f35a5f2b73.xlsx]

## Sheet: MEC1_1 cell
libDIA-Protein Groups IDs												dirDIA-Protein Groups IDs
Source	PG.ProteinGroups	PG.ProteinAccessions	PG.Genes	PG.ProteinDescriptions	PG.UniProtIds	PG.ProteinNames	[1] 20201112_MEC1-MF-1cell-Eclipse-DIA-01.raw.PG.Quantity	[2] 20201112_MEC1-MF-1cell-Eclipse-DIA-02.raw.PG.Quantity	[3] 20201112_MEC1-MF-1cell-Eclipse-DIA-03.raw.PG.Quantity			Source	PG.ProteinGroups	PG.ProteinAccessions	PG.Genes	PG.ProteinDescriptions	PG.UniProtIds	PG.ProteinNames	[1] 20201112_MEC1-MF-1cell-Eclipse-DIA-01.raw.PG.Quantity	[2] 20201112_MEC1-MF-1cell-Eclipse-DIA-02.raw.PG.Quantity	[3] 20201112_MEC1-MF-1cell-Eclipse-DIA-03.raw.PG.Quantity
libDIA	A1L4H1	A1L4H1	SSC5D	Soluble scavenger receptor cysteine-rich domain-containing protein SSC5D	A1L4H1	SRCRL_HUMAN	26632.9	3817.88	Filtered			dirDIA	E9PAV3;Q13765	E9PAV3;Q13765	NACA	Nascent polypeptide-associated complex subunit alpha, muscle-specific form;Nascent polypeptide-associated complex subunit alpha	E9PAV3;Q13765	NACAM_HUMAN;NACA_HUMAN	12147	2615	2117.93
libDIA	A5A3E0	A5A3E0	POTEF	POTE ankyrin domain family member F	A5A3E0	POTEF_HUMAN	121132	116655	107164			dirDIA	O00151	O00151	PDLIM1	PDZ and LIM domain protein 1	O00151	PDLI1_HUMAN	61653.2	12357.1	14239.1
libDIA	B5ME19;Q99613	B5ME19;Q99613	EIF3CL;EIF3C	Eukaryotic translation initiation factor 3 subunit C-like protein;Eukaryotic translation initiation factor 3 subunit C	B5ME19;Q99613	EIFCL_HUMAN;EIF3C_HUMAN	Filtered	8795.77	1830.95			dirDIA	O14818;Q8TAA3	O14818;Q8TAA3	PSMA7;PSMA8	Proteasome subunit alpha type-7;Proteasome subunit alpha type-7-like	O14818;Q8TAA3	PSA7_HUMAN;PSA7L_HUMAN	17071.8	3318.7	9048.26
libDIA	E9PAV3;Q13765	E9PAV3;Q13765	NACA	Nascent polypeptide-associated complex subunit alpha, muscle-specific form;Nascent polypeptide-associated complex subunit alpha	E9PAV3;Q13765	NACAM_HUMAN;NACA_HUMAN	11224.6	3431.33	2216			dirDIA	O60814;P57053;P58876;P62807;Q5QNW6;Q93079;Q99877;Q99879;Q99880	O60814;P57053;P58876;P62807;Q5QNW6;Q93079;Q99877;Q99879;Q99880	HIST1H2BK;H2BFS;HIST1H2BD;HIST1H2BC;HIST2H2BF;HIST1H2BH;HIST1H2BN;HIST1H2BM;HIST1H2BL	Histone H2B type 1-K;Histone H2B type F-S;Histone H2B type 1-D;Histone H2B type 1-C/E/F/G/I;Histone H2B type 2-F;Histone H2B type 1-H;Histone H2B type 1-N;Histone H2B type 1-M;Histone H2B type 1-L	O60814;P57053;P58876;P62807;Q5QNW6;Q93079;Q99877;Q99879;Q99880	H2B1K_HUMAN;H2BFS_HUMAN;H2B1D_HUMAN;H2B1C_HUMAN;H2B2F_HUMAN;H2B1H_HUMAN;H2B1N_HUMAN;H2B1M_HUMAN;H2B1L_HUMAN	492579	177878	115531
libDIA	O00148	O00148	DDX39A	ATP-dependent RNA helicase DDX39A	O00148	DX39A_HUMAN	15124.5	8878	7565.69			dirDIA	O75342	O75342	ALOX12B	Arachidonate 12-lipoxygenase, 12R-type	O75342	LX12B_HUMAN	2.82496	6749.77	2971.39
libDIA	O00151	O00151	PDLIM1	PDZ and LIM domain protein 1	O00151	PDLI1_HUMAN	45222.3	10581.1	6972.39			dirDIA	O75347	O75347	TBCA	Tubulin-specific chaperone A	O75347	TBCA_HUMAN	10039.3	1312.26	7944.15
libDIA	O00232	O00232	PSMD12	26S proteasome non-ATPase regulatory subunit 12	O00232	PSD12_HUMAN	Filtered	3403.32	1621.69			dirDIA	P00338	P00338	LDHA	L-lactate dehydrogenase A chain	P00338	LDHA_HUMAN	27631.1	15933.7	31683.7
libDIA	O00299	O00299	CLIC1	Chloride intracellular channel protein 1	O00299	CLIC1_HUMAN	3281.38	3340.78	4200.93			dirDIA	P00558	P00558	PGK1	Phosphoglycerate kinase 1	P00558	PGK1_HUMAN	18528.1	6646.5	11313.7
libDIA	O00410	O00410	IPO5	Importin-5	O00410	IPO5_HUMAN	Filtered	2240.38	1266.89			dirDIA	P01008	P01008	SERPINC1	Antithrombin-III	P01008	ANT3_HUMAN	53402.2	29404.9	8624.16
libDIA	O00487	O00487	PSMD14	26S proteasome non-ATPase regulatory subunit 14	O00487	PSDE_HUMAN	Filtered	Filtered	1243.92			dirDIA	P01040	P01040	CSTA	Cystatin-A	P01040	CYTA_HUMAN	5925.65	12623.8	4103.97
libDIA	O00571	O00571	DDX3X	ATP-dependent RNA helicase DDX3X	O00571	DDX3X_HUMAN	16341.6	6471.88	3456.83			dirDIA	P01834	P01834	IGKC	Ig kappa chain C region	P01834	IGKC_HUMAN	Filtered	307.892	2532.66
libDIA	O14744	O14744	PRMT5	Protein arginine N-methyltransferase 5	O14744	ANM5_HUMAN	Filtered	Filtered	1943.44			dirDIA	P01876	P01876	IGHA1	Ig alpha-1 chain C region	P01876	IGHA1_HUMAN	Filtered	2122.96	5008.03
libDIA	O14818	O14818	PSMA7	Proteasome subunit alpha type-7	O14818	PSA7_HUMAN	9894.77	5274.18	5658.61			dirDIA	P01911;P01912;P04440;P20039;Q5Y7A7;Q95IE3	P01911;P01912;P04440;P20039;Q5Y7A7;Q95IE3	HLA-DRB1;HLA-DRB1;HLA-DPB1;HLA-DRB1;HLA-DRB1;HLA-DRB1	HLA class II histocompatibility antigen, DRB1-15 beta chain;HLA class II histocompatibility antigen, DRB1-3 chain;HLA class II histocompatibility antigen, DP beta 1 chain;HLA class II histocompatibility antigen, DRB1-11 beta chain;HLA class II histocompatibility antigen, DRB1-13 beta chain;HLA class II histocompatibility antigen, DRB1-12 beta chain	P01911;P01912;P04440;P20039;Q5Y7A7;Q95IE3	2B1F_HUMAN;2B13_HUMAN;DPB1_HUMAN;2B1B_HUMAN;2B1D_HUMAN;2B1C_HUMAN	52265.7	17671.8	28552.6
libDIA	O14950;P19105	O14950;P19105	MYL12B;MYL12A	Myosin regulatory light chain 12B;Myosin regulatory light chain 12A	O14950;P19105	ML12B_HUMAN;ML12A_HUMAN	3937.43	2612.09	3144.62			dirDIA	P02533	P02533	KRT14	Keratin, type I cytoskeletal 14	P02533	K1C14_HUMAN	321642	909778	928334
libDIA	O14979	O14979	HNRNPDL	Heterogeneous nuclear ribonucleoprotein D-like	O14979	HNRDL_HUMAN	3666.74	8706.31	4554.16			dirDIA	P02538	P02538	KRT6A	Keratin, type II cytoskeletal 6A	P02538	K2C6A_HUMAN	3.70181	2663.2	5329.61
libDIA	O15143	O15143	ARPC1B	Actin-related protein 2/3 complex subunit 1B	O15143	ARC1B_HUMAN	Filtered	Filtered	2380.26			dirDIA	P02768	P02768	ALB	Serum albumin	P02768	ALBU_HUMAN	24686934	9265780	26207570
libDIA	O15144	O15144	ARPC2	Actin-related protein 2/3 complex subunit 2	O15144	ARPC2_HUMAN	Filtered	2391.03	3127.7			dirDIA	P02786	P02786	TFRC	Transferrin receptor protein 1	P02786	TFR1_HUMAN	1475.21	2182.4	1660.08
libDIA	O15145	O15145	ARPC3	Actin-related protein 2/3 complex subunit 3	O15145	ARPC3_HUMAN	Filtered	6664.49	7059.15			dirDIA	P04040	P04040	CAT	Catalase	P04040	CATA_HUMAN	Filtered	1157.11	2295.84
libDIA	O15371	O15371	EIF3D	Eukaryotic translation initiation factor 3 subunit D	O15371	EIF3D_HUMAN	Filtered	2308.97	829.446			dirDIA	P04075	P04075	ALDOA	Fructose-bisphosphate aldolase A	P04075	ALDOA_HUMAN	84836.1	22225.1	41502.8
libDIA	O15511	O15511	ARPC5	Actin-related protein 2/3 complex subunit 5	O15511	ARPC5_HUMAN	3707.73	4250.56	4858.67			dirDIA	P04259	P04259	KRT6B	Keratin, type II cytoskeletal 6B	P04259	K2C6B_HUMAN	1.21842e+06	1871383	910838
libDIA	O43169	O43169	CYB5B	Cytochrome b5 type B	O43169	CYB5B_HUMAN	Filtered	Filtered	502.463			dirDIA	P04264	P04264	KRT1	Keratin, type II cytoskeletal 1	P04264	K2C1_HUMAN	1.26411e+06	2.71218e+06	1.58662e+06
libDIA	O43242	O43242	PSMD3	26S proteasome non-ATPase regulatory subunit 3	O43242	PSMD3_HUMAN	Filtered	Filtered	1237.11			dirDIA	P04406	P04406	GAPDH	Glyceraldehyde-3-phosphate dehydrogenase	P04406	G3P_HUMAN	410073	93944	167537
libDIA	O43707	O43707	ACTN4	Alpha-actinin-4	O43707	ACTN4_HUMAN	Filtered	Filtered	1407.99			dirDIA	P04908;P0C0S8;P20671;Q16777;Q6FI13;Q7L7L0;Q93077;Q96KK5;Q99878;Q9BTM1	P04908;P0C0S8;P20671;Q16777;Q6FI13;Q7L7L0;Q93077;Q96KK5;Q99878;Q9BTM1	HIST1H2AB;HIST1H2AG;HIST1H2AD;HIST2H2AC;HIST2H2AA3;HIST3H2A;HIST1H2AC;HIST1H2AH;HIST1H2AJ;H2AFJ	Histone H2A type 1-B/E;Histone H2A type 1;Histone H2A type 1-D;Histone H2A type 2-C;Histone H2A type 2-A;Histone H2A type 3;Histone H2A type 1-C;Histone H2A type 1-H;Histone H2A type 1-J;Histone H2A.J	P04908;P0C0S8;P20671;Q16777;Q6FI13;Q7L7L0;Q93077;Q96KK5;Q99878;Q9BTM1	H2A1B_HUMAN;H2A1_HUMAN;H2A1D_HUMAN;H2A2C_HUMAN;H2A2A_HUMAN;H2A3_HUMAN;H2A1C_HUMAN;H2A1H_HUMAN;H2A1J_HUMAN;H2AJ_HUMAN	28965.4	43078.9	19583.9
libDIA	O43760	O43760	SYNGR2	Synaptogyrin-2	O43760	SNG2_HUMAN	12302.7	6516.15	8495.43			dirDIA	P05089	P05089	ARG1	Arginase-1	P05089	ARGI1_HUMAN	2.38361	8519.24	4085.54
libDIA	O60506	O60506	SYNCRIP	Heterogeneous nuclear ribonucleoprotein Q	O60506	HNRPQ_HUMAN	11505.2	6044.61	3611.52			dirDIA	P05141	P05141	SLC25A5	ADP/ATP translocase 2	P05141	ADT2_HUMAN	14559.6	6308.91	3363.43
libDIA	O60814;P57053;P58876;P62807;Q5QNW6;Q93079;Q99877;Q99879;Q99880	O60814;P57053;P58876;P62807;Q5QNW6;Q93079;Q99877;Q99879;Q99880	HIST1H2BK;H2BFS;HIST1H2BD;HIST1H2BC;HIST2H2BF;HIST1H2BH;HIST1H2BN;HIST1H2BM;HIST1H2BL	Histone H2B type 1-K;Histone H2B type F-S;Histone H2B type 1-D;Histone H2B type 1-C/E/F/G/I;Histone H2B type 2-F;Histone H2B type 1-H;Histone H2B type 1-N;Histone H2B type 1-M;Histone H2B type 1-L	O60814;P57053;P58876;P62807;Q5QNW6;Q93079;Q99877;Q99879;Q99880	H2B1K_HUMAN;H2BFS_HUMAN;H2B1D_HUMAN;H2B1C_HUMAN;H2B2F_HUMAN;H2B1H_HUMAN;H2B1N_HUMAN;H2B1M_HUMAN;H2B1L_HUMAN	60861.6	46938.3	21867.9			dirDIA	P05387	P05387	RPLP2	60S acidic ribosomal protein P2	P05387	RLA2_HUMAN	40280.7	12167.7	16795.6
libDIA	O60869	O60869	EDF1	Endothelial differentiation-related factor 1	O60869	EDF1_HUMAN	Filtered	Filtered	1004.37			dirDIA	P05388;Q8NHW5	P05388;Q8NHW5	RPLP0;RPLP0P6	60S acidic ribosomal protein P0;60S acidic ribosomal protein P0-like	P05388;Q8NHW5	RLA0_HUMAN;RLA0L_HUMAN	4799.43	3973.52	3128.37
libDIA	O75083	O75083	WDR1	WD repeat-containing protein 1	O75083	WDR1_HUMAN	Filtered	Filtered	1105.32			dirDIA	P05783	P05783	KRT18	Keratin, type I cytoskeletal 18	P05783	K1C18_HUMAN	Filtered	Filtered	8287
libDIA	O75150	O75150	RNF40	E3 ubiquitin-protein ligase BRE1B	O75150	BRE1B_HUMAN	Filtered	Filtered	1.5939e+06			dirDIA	P06576	P06576	ATP5B	ATP synthase subunit beta, mitochondrial	P06576	ATPB_HUMAN	28644.3	16620.6	10408.3
libDIA	O75342	O75342	ALOX12B	Arachidonate 12-lipoxygenase, 12R-type	O75342	LX12B_HUMAN	Filtered	7664.69	2685.75			dirDIA	P06702	P06702	S100A9	Protein S100-A9	P06702	S10A9_HUMAN	5.87054	14261.4	10737
libDIA	O75347	O75347	TBCA	Tubulin-specific chaperone A	O75347	TBCA_HUMAN	6656.3	Filtered	3638.28			dirDIA	P06733	P06733	ENO1	Alpha-enolase	P06733	ENOA_HUMAN	94156.8	44016.8	58845.2
libDIA	O75368	O75368	SH3BGRL	SH3 domain-binding glutamic acid-rich-like protein	O75368	SH3L1_HUMAN	Filtered	227.42	1061.65			dirDIA	P06744	P06744	GPI	Glucose-6-phosphate isomerase	P06744	G6PI_HUMAN	Filtered	956.204	8381.13
libDIA	O75534	O75534	CSDE1	Cold shock domain-containing protein E1	O75534	CSDE1_HUMAN	Filtered	Filtered	312.741			dirDIA	P06748	P06748	NPM1	Nucleophosmin	P06748	NPM_HUMAN	16622.1	10432.4	12253.9
libDIA	O75821	O75821	EIF3G	Eukaryotic translation initiation factor 3 subunit G	O75821	EIF3G_HUMAN	Filtered	637.571	1788.34			dirDIA	P06753	P06753	TPM3	Tropomyosin alpha-3 chain	P06753	TPM3_HUMAN	48109.5	11621.9	24114.6
libDIA	O75822	O75822	EIF3J	Eukaryotic translation initiation factor 3 subunit J	O75822	EIF3J_HUMAN	Filtered	Filtered	1712.27			dirDIA	P07195	P07195	LDHB	L-lactate dehydrogenase B chain	P07195	LDHB_HUMAN	114349	20091.8	43907.9
libDIA	O76003	O76003	GLRX3	Glutaredoxin-3	O76003	GLRX3_HUMAN	Filtered	Filtered	3201.01			dirDIA	P07355	P07355	ANXA2	Annexin A2	P07355	ANXA2_HUMAN	5357.49	14733.8	11947.8
libDIA	O95716;P20336;P20337;P51153;P61006;Q92930;Q96E17	O95716;P20336;P20337;P51153;P61006;Q92930;Q96E17	RAB3D;RAB3A;RAB3B;RAB13;RAB8A;RAB8B;RAB3C	Ras-related protein Rab-3D;Ras-related protein Rab-3A;Ras-related protein Rab-3B;Ras-related protein Rab-13;Ras-related protein Rab-8A;Ras-related protein Rab-8B;Ras-related protein Rab-3C	O95716;P20336;P20337;P51153;P61006;Q92930;Q96E17	RAB3D_HUMAN;RAB3A_HUMAN;RAB3B_HUMAN;RAB13_HUMAN;RAB8A_HUMAN;RAB8B_HUMAN;RAB3C_HUMAN	Filtered	1533.98	3204.62			dirDIA	P07437	P07437	TUBB	Tubulin beta chain	P07437	TBB5_HUMAN	122975	14688	23720.8
libDIA	P00338	P00338	LDHA	L-lactate dehydrogenase A chain	P00338	LDHA_HUMAN	75390.9	48133.8	56899.9			dirDIA	P07477;P07478;Q8NHM4	P07477;P07478;Q8NHM4	PRSS1;PRSS2;PRSS3P2	Trypsin-1;Trypsin-2;Putative trypsin-6	P07477;P07478;Q8NHM4	TRY1_HUMAN;TRY2_HUMAN;TRY6_HUMAN	26058.8	23343.4	7141.69
libDIA	P00403	P00403	MT-CO2	Cytochrome c oxidase subunit 2	P00403	COX2_HUMAN	10422.8	11068.5	2963.88			dirDIA	P07737	P07737	PFN1	Profilin-1	P07737	PROF1_HUMAN	28543.9	10215.5	17246.5
libDIA	P00441	P00441	SOD1	Superoxide dismutase [Cu-Zn]	P00441	SODC_HUMAN	Filtered	3474.9	2308.23			dirDIA	P07741	P07741	APRT	Adenine phosphoribosyltransferase	P07741	APT_HUMAN	13924	2793.08	4735.91
libDIA	P00491	P00491	PNP	Purine nucleoside phosphorylase	P00491	PNPH_HUMAN	Filtered	Filtered	2379.84			dirDIA	P07900	P07900	HSP90AA1	Heat shock protein HSP 90-alpha	P07900	HS90A_HUMAN	38833.1	6165.38	23082.8
libDIA	P00558	P00558	PGK1	Phosphoglycerate kinase 1	P00558	PGK1_HUMAN	16026.2	10774.1	13229			dirDIA	P07910	P07910	HNRNPC	Heterogeneous nuclear ribonucleoproteins C1/C2	P07910	HNRPC_HUMAN	18671.2	7262.34	4152.91
libDIA	P01008	P01008	SERPINC1	Antithrombin-III	P01008	ANT3_HUMAN	26251.2	67188.5	15908.6			dirDIA	P08133	P08133	ANXA6	Annexin A6	P08133	ANXA6_HUMAN	12231.3	5439.72	10072
libDIA	P01040	P01040	CSTA	Cystatin-A	P01040	CYTA_HUMAN	6081.18	20148.9	5026.35			dirDIA	P08238	P08238	HSP90AB1	Heat shock protein HSP 90-beta	P08238	HS90B_HUMAN	254253	54430.8	77323.5
libDIA	P01834	P01834	IGKC	Ig kappa chain C region	P01834	IGKC_HUMAN	5562.41	5287.67	3914.86			dirDIA	P08575	P08575	PTPRC	Receptor-type tyrosine-protein phosphatase C	P08575	PTPRC_HUMAN	559906	519360	128636
libDIA	P01871	P01871	IGHM	Ig mu chain C region	P01871	IGHM_HUMAN	9830.4	5874.58	9103.82			dirDIA	P08779	P08779	KRT16	Keratin, type I cytoskeletal 16	P08779	K1C16_HUMAN	Filtered	3110.8	10436.9
libDIA	P01876	P01876	IGHA1	Ig alpha-1 chain C region	P01876	IGHA1_HUMAN	Filtered	Filtered	8672.92			dirDIA	P08865	P08865	RPSA	40S ribosomal protein SA	P08865	RSSA_HUMAN	123598	17924.3	51807.6
libDIA	P01903	P01903	HLA-DRA	HLA class II histocompatibility antigen, DR alpha chain	P01903	DRA_HUMAN	Filtered	3752.78	1872.65			dirDIA	P09211	P09211	GSTP1	Glutathione S-transferase P	P09211	GSTP1_HUMAN	Filtered	4241.54	5867
libDIA	P01911	P01911	HLA-DRB1	HLA class II histocompatibility antigen, DRB1-15 beta chain	P01911	2B1F_HUMAN	Filtered	Filtered	2323.56			dirDIA	P09651;Q32P51	P09651;Q32P51	HNRNPA1;HNRNPA1L2	Heterogeneous nuclear ribonucleoprotein A1;Heterogeneous nuclear ribonucleoprotein A1-like 2	P09651;Q32P51	ROA1_HUMAN;RA1L2_HUMAN	22300.3	14196	10373.4
libDIA	P01920	P01920	HLA-DQB1	HLA class II histocompatibility antigen, DQ beta 1 chain	P01920	DQB1_HUMAN	4722.57	1324.79	2299.32			dirDIA	P0C0S5;Q71UI9	P0C0S5;Q71UI9	H2AFZ;H2AFV	Histone H2A.Z;Histone H2A.V	P0C0S5;Q71UI9	H2AZ_HUMAN;H2AV_HUMAN	35782	13786.4	7527.39
libDIA	P02533	P02533	KRT14	Keratin, type I cytoskeletal 14	P02533	K1C14_HUMAN	226539	1.00828e+06	822106			dirDIA	P0CG47;P0CG48;P62979;P62987	P0CG47;P0CG48;P62979;P62987	UBB;UBC;RPS27A;UBA52	Polyubiquitin-B;Polyubiquitin-C;Ubiquitin-40S ribosomal protein S27a;Ubiquitin-60S ribosomal protein L40	P0CG47;P0CG48;P62979;P62987	UBB_HUMAN;UBC_HUMAN;RS27A_HUMAN;RL40_HUMAN	59342.6	26700.9	39453.7
libDIA	P02538	P02538	KRT6A	Keratin, type II cytoskeletal 6A	P02538	K2C6A_HUMAN	143077	519241	368732			dirDIA	P10412;P16402;P16403	P10412;P16402;P16403	HIST1H1E;HIST1H1D;HIST1H1C	Histone H1.4;Histone H1.3;Histone H1.2	P10412;P16402;P16403	H14_HUMAN;H13_HUMAN;H12_HUMAN	72359.7	36354.8	35602.9
libDIA	P02545	P02545	LMNA	Prelamin-A/C	P02545	LMNA_HUMAN	69043.4	2785.47	2934.97			dirDIA	P10599	P10599	TXN	Thioredoxin	P10599	THIO_HUMAN	98192.2	39304	57163.4
libDIA	P02768	P02768	ALB	Serum albumin	P02768	ALBU_HUMAN	47715540	93463336	41012272			dirDIA	P10809	P10809	HSPD1	60 kDa heat shock protein, mitochondrial	P10809	CH60_HUMAN	23365.8	15365.9	14563.5
libDIA	P02786	P02786	TFRC	Transferrin receptor protein 1	P02786	TFR1_HUMAN	Filtered	Filtered	1344.43			dirDIA	P11021	P11021	HSPA5	78 kDa glucose-regulated protein	P11021	GRP78_HUMAN	17163.8	8563.63	11994.8
libDIA	P02788	P02788	LTF	Lactotransferrin	P02788	TRFL_HUMAN	Filtered	12410.1	6607.41			dirDIA	P11142	P11142	HSPA8	Heat shock cognate 71 kDa protein	P11142	HSP7C_HUMAN	197985	52248.4	76553.7
libDIA	P04040	P04040	CAT	Catalase	P04040	CATA_HUMAN	Filtered	5930.82	3172.2			dirDIA	P11226	P11226	MBL2	Mannose-binding protein C	P11226	MBL2_HUMAN	100562	21128.8	29779.1
libDIA	P04075	P04075	ALDOA	Fructose-bisphosphate aldolase A	P04075	ALDOA_HUMAN	65471.4	28118.8	39994.7			dirDIA	P12004	P12004	PCNA	Proliferating cell nuclear antigen	P12004	PCNA_HUMAN	4113.49	1112.32	4956.69
libDIA	P04259	P04259	KRT6B	Keratin, type II cytoskeletal 6B	P04259	K2C6B_HUMAN	Filtered	Filtered	11914			dirDIA	P12273	P12273	PIP	Prolactin-inducible protein	P12273	PIP_HUMAN	Filtered	12151.3	9479.11
libDIA	P04264	P04264	KRT1	Keratin, type II cytoskeletal 1	P04264	K2C1_HUMAN	2456278	5.92061e+06	3.21596e+06			dirDIA	P12956	P12956	XRCC6	X-ray repair cross-complementing protein 6	P12956	XRCC6_HUMAN	20249	8025.76	5442.26
libDIA	P04406	P04406	GAPDH	Glyceraldehyde-3-phosphate dehydrogenase	P04406	G3P_HUMAN	164535	63317.4	112146			dirDIA	P13639	P13639	EEF2	Elongation factor 2	P13639	EF2_HUMAN	158268	38924.9	54101.1
libDIA	P04440	P04440	HLA-DPB1	HLA class II histocompatibility antigen, DP beta 1 chain	P04440	DPB1_HUMAN	39938.1	22477.9	14247.5			dirDIA	P13645	P13645	KRT10	Keratin, type I cytoskeletal 10	P13645	K1C10_HUMAN	2.66745e+06	1.68591e+06	1.1441e+06
libDIA	P04843	P04843	RPN1	Dolichyl-diphosphooligosaccharide--protein glycosyltransferase subunit 1	P04843	RPN1_HUMAN	Filtered	2689.71	920.538			dirDIA	P13647	P13647	KRT5	Keratin, type II cytoskeletal 5	P13647	K2C5_HUMAN	176614	359853	206138
libDIA	P04844	P04844	RPN2	Dolichyl-diphosphooligosaccharide--protein glycosyltransferase subunit 2	P04844	RPN2_HUMAN	Filtered	Filtered	2507.66			dirDIA	P13667	P13667	PDIA4	Protein disulfide-isomerase A4	P13667	PDIA4_HUMAN	4858.48	1923.05	8044.56
libDIA	P04908;P0C0S8;P20671;Q16777;Q6FI13;Q7L7L0;Q93077;Q96KK5;Q99878;Q9BTM1	P04908;P0C0S8;P20671;Q16777;Q6FI13;Q7L7L0;Q93077;Q96KK5;Q99878;Q9BTM1	HIST1H2AB;HIST1H2AG;HIST1H2AD;HIST2H2AC;HIST2H2AA3;HIST3H2A;HIST1H2AC;HIST1H2AH;HIST1H2AJ;H2AFJ	Histone H2A type 1-B/E;Histone H2A type 1;Histone H2A type 1-D;Histone H2A type 2-C;Histone H2A type 2-A;Histone H2A type 3;Histone H2A type 1-C;Histone H2A type 1-H;Histone H2A type 1-J;Histone H2A.J	P04908;P0C0S8;P20671;Q16777;Q6FI13;Q7L7L0;Q93077;Q96KK5;Q99878;Q9BTM1	H2A1B_HUMAN;H2A1_HUMAN;H2A1D_HUMAN;H2A2C_HUMAN;H2A2A_HUMAN;H2A3_HUMAN;H2A1C_HUMAN;H2A1H_HUMAN;H2A1J_HUMAN;H2AJ_HUMAN	610991	449178	204619			dirDIA	P13796	P13796	LCP1	Plastin-2	P13796	PLSL_HUMAN	51457	17435.5	27318.8
libDIA	P05023	P05023	ATP1A1	Sodium/potassium-transporting ATPase subunit alpha-1	P05023	AT1A1_HUMAN	3092.87	412.611	2025.87			dirDIA	P14618	P14618	PKM	Pyruvate kinase PKM	P14618	KPYM_HUMAN	97490.2	29925.9	31047.4
libDIA	P05089	P05089	ARG1	Arginase-1	P05089	ARGI1_HUMAN	8208.28	23584.6	6738.46			dirDIA	P14625	P14625	HSP90B1	Endoplasmin	P14625	ENPL_HUMAN	26938	4632.7	7963.31
libDIA	P05109	P05109	S100A8	Protein S100-A8	P05109	S10A8_HUMAN	Filtered	14294.8	7764.93			dirDIA	P14649;P60660	P14649;P60660	MYL6B;MYL6	Myosin light chain 6B;Myosin light polypeptide 6	P14649;P60660	MYL6B_HUMAN;MYL6_HUMAN	14210.7	3477.69	7869.57
libDIA	P05141	P05141	SLC25A5	ADP/ATP translocase 2	P05141	ADT2_HUMAN	13429.2	9050.63	4374.97			dirDIA	P14923	P14923	JUP	Junction plakoglobin	P14923	PLAK_HUMAN	Filtered	8146.33	3437.64
libDIA	P05198	P05198	EIF2S1	Eukaryotic translation initiation factor 2 subunit 1	P05198	IF2A_HUMAN	3393.58	2801.49	2620.11			dirDIA	P15259;P18669;Q8N0Y7	P15259;P18669;Q8N0Y7	PGAM2;PGAM1;PGAM4	Phosphoglycerate mutase 2;Phosphoglycerate mutase 1;Probable phosphoglycerate mutase 4	P15259;P18669;Q8N0Y7	PGAM2_HUMAN;PGAM1_HUMAN;PGAM4_HUMAN	1.46085	402.341	3189.41
libDIA	P05387	P05387	RPLP2	60S acidic ribosomal protein P2	P05387	RLA2_HUMAN	36024.9	15041.5	19100.7			dirDIA	P15531	P15531	NME1	Nucleoside diphosphate kinase A	P15531	NDKA_HUMAN	35952.3	12644.6	33992.9
libDIA	P05388	P05388	RPLP0	60S acidic ribosomal protein P0	P05388	RLA0_HUMAN	11159.5	6503.18	5681.12			dirDIA	P15880	P15880	RPS2	40S ribosomal protein S2	P15880	RS2_HUMAN	58665.2	8862.27	8374.54
libDIA	P05787	P05787	KRT8	Keratin, type II cytoskeletal 8	P05787	K2C8_HUMAN	Filtered	Filtered	2674.45			dirDIA	P15924	P15924	DSP	Desmoplakin	P15924	DESP_HUMAN	1.61297	20077.6	13742.5
libDIA	P06493	P06493	CDK1	Cyclin-dependent kinase 1	P06493	CDK1_HUMAN	Filtered	2020.42	2601.51			dirDIA	P16104;Q96QV6	P16104;Q96QV6	H2AFX;HIST1H2AA	Histone H2AX;Histone H2A type 1-A	P16104;Q96QV6	H2AX_HUMAN;H2A1A_HUMAN	1.01737e+06	307594	176386
libDIA	P06576	P06576	ATP5B	ATP synthase subunit beta, mitochondrial	P06576	ATPB_HUMAN	41753	22029.7	14055.1			dirDIA	P16401	P16401	HIST1H1B	Histone H1.5	P16401	H15_HUMAN	127432	22660.8	32873.7
libDIA	P06702	P06702	S100A9	Protein S100-A9	P06702	S10A9_HUMAN	Filtered	58772	32555.1			dirDIA	P16949	P16949	STMN1	Stathmin	P16949	STMN1_HUMAN	17966.5	7219.42	13709.8
libDIA	P06733	P06733	ENO1	Alpha-enolase	P06733	ENOA_HUMAN	74956.7	53557.3	58952.1			dirDIA	P16989;P67809;Q9Y2T7	P16989;P67809;Q9Y2T7	YBX3;YBX1;YBX2	Y-box-binding protein 3;Nuclease-sensitive element-binding protein 1;Y-box-binding protein 2	P16989;P67809;Q9Y2T7	YBOX3_HUMAN;YBOX1_HUMAN;YBOX2_HUMAN	Filtered	847.248	2130.06
libDIA	P06744	P06744	GPI	Glucose-6-phosphate isomerase	P06744	G6PI_HUMAN	3853.83	2387.74	5586.86			dirDIA	P17844	P17844	DDX5	Probable ATP-dependent RNA helicase DDX5	P17844	DDX5_HUMAN	45977.6	12317.9	7961.21
libDIA	P06748	P06748	NPM1	Nucleophosmin	P06748	NPM_HUMAN	13655.3	13550.5	11011.3			dirDIA	P18077	P18077	RPL35A	60S ribosomal protein L35a	P18077	RL35A_HUMAN	24692.4	3713.13	5326.95
libDIA	P06753	P06753	TPM3	Tropomyosin alpha-3 chain	P06753	TPM3_HUMAN	11865.9	3799.62	5489.98			dirDIA	P18085;P61204;P84077;P84085	P18085;P61204;P84077;P84085	ARF4;ARF3;ARF1;ARF5	ADP-ribosylation factor 4;ADP-ribosylation factor 3;ADP-ribosylation factor 1;ADP-ribosylation factor 5	P18085;P61204;P84077;P84085	ARF4_HUMAN;ARF3_HUMAN;ARF1_HUMAN;ARF5_HUMAN	65662.1	13930.9	15302.3
libDIA	P06899;P23527;P33778;Q16778	P06899;P23527;P33778;Q16778	HIST1H2BJ;HIST1H2BO;HIST1H2BB;HIST2H2BE	Histone H2B type 1-J;Histone H2B type 1-O;Histone H2B type 1-B;Histone H2B type 2-E	P06899;P23527;P33778;Q16778	H2B1J_HUMAN;H2B1O_HUMAN;H2B1B_HUMAN;H2B2E_HUMAN	330009	184768	98464.4			dirDIA	P18621	P18621	RPL17	60S ribosomal protein L17	P18621	RL17_HUMAN	44818.5	8655.5	11196.6
libDIA	P07195	P07195	LDHB	L-lactate dehydrogenase B chain	P07195	LDHB_HUMAN	64110.2	20083	31575.4			dirDIA	P19338	P19338	NCL	Nucleolin	P19338	NUCL_HUMAN	68416.7	17183.2	16047.7
libDIA	P07237	P07237	P4HB	Protein disulfide-isomerase	P07237	PDIA1_HUMAN	1920.83	3786.49	5044.73			dirDIA	P21796	P21796	VDAC1	Voltage-dependent anion-selective channel protein 1	P21796	VDAC1_HUMAN	5399.83	4970.12	6355.74
libDIA	P07339	P07339	CTSD	Cathepsin D	P07339	CATD_HUMAN	Filtered	Filtered	2178.34			dirDIA	P22626	P22626	HNRNPA2B1	Heterogeneous nuclear ribonucleoproteins A2/B1	P22626	ROA2_HUMAN	144670	44559	38759.8
libDIA	P07355	P07355	ANXA2	Annexin A2	P07355	ANXA2_HUMAN	4619.62	12625	8569.19			dirDIA	P23284	P23284	PPIB	Peptidyl-prolyl cis-trans isomerase B	P23284	PPIB_HUMAN	19794.2	8409.67	4405.97
libDIA	P07384	P07384	CAPN1	Calpain-1 catalytic subunit	P07384	CAN1_HUMAN	Filtered	4139.33	1870.98			dirDIA	P23396	P23396	RPS3	40S ribosomal protein S3	P23396	RS3_HUMAN	117679	29043.6	27767.1
libDIA	P07437	P07437	TUBB	Tubulin beta chain	P07437	TBB5_HUMAN	97983.8	18901.4	24299.5			dirDIA	P23526	P23526	AHCY	Adenosylhomocysteinase	P23526	SAHH_HUMAN	9536.4	3867.64	7932.35
libDIA	P07477;P07478;Q8NHM4	P07477;P07478;Q8NHM4	PRSS1;PRSS2;PRSS3P2	Trypsin-1;Trypsin-2;Putative trypsin-6	P07477;P07478;Q8NHM4	TRY1_HUMAN;TRY2_HUMAN;TRY6_HUMAN	Filtered	9626.96	1431.62			dirDIA	P23528	P23528	CFL1	Cofilin-1	P23528	COF1_HUMAN	9955.96	4847.65	6959.28
libDIA	P07737	P07737	PFN1	Profilin-1	P07737	PROF1_HUMAN	17804.7	10848.7	17681.1			dirDIA	P25705	P25705	ATP5A1	ATP synthase subunit alpha, mitochondrial	P25705	ATPA_HUMAN	41122.1	23752.3	13929.6
libDIA	P07741	P07741	APRT	Adenine phosphoribosyltransferase	P07741	APT_HUMAN	12205.7	3871.14	4715.45			dirDIA	P25788	P25788	PSMA3	Proteasome subunit alpha type-3	P25788	PSA3_HUMAN	Filtered	2071.42	5160.35
libDIA	P07900	P07900	HSP90AA1	Heat shock protein HSP 90-alpha	P07900	HS90A_HUMAN	36778.8	9301.12	23442.5			dirDIA	P26038	P26038	MSN	Moesin	P26038	MOES_HUMAN	5.30122	3782.97	8533.43
libDIA	P07910	P07910	HNRNPC	Heterogeneous nuclear ribonucleoproteins C1/C2	P07910	HNRPC_HUMAN	13733.8	25262.3	20529			dirDIA	P26373	P26373	RPL13	60S ribosomal protein L13	P26373	RL13_HUMAN	67577.5	19351.4	17748.5
libDIA	P07954	P07954	FH	Fumarate hydratase, mitochondrial	P07954	FUMH_HUMAN	Filtered	Filtered	1077.38			dirDIA	P26641	P26641	EEF1G	Elongation factor 1-gamma	P26641	EF1G_HUMAN	27755.8	4384.72	8927.83
libDIA	P08133	P08133	ANXA6	Annexin A6	P08133	ANXA6_HUMAN	12836	8993.05	10962.1			dirDIA	P27348	P27348	YWHAQ	14-3-3 protein theta	P27348	1433T_HUMAN	34666.3	10224.4	19544.5
libDIA	P08195	P08195	SLC3A2	4F2 cell-surface antigen heavy chain	P08195	4F2_HUMAN	Filtered	Filtered	866.381			dirDIA	P27797	P27797	CALR	Calreticulin	P27797	CALR_HUMAN	3408.21	3766.36	3434.08
libDIA	P08238	P08238	HSP90AB1	Heat shock protein HSP 90-beta	P08238	HS90B_HUMAN	197590	73509.5	76052.2			dirDIA	P27824	P27824	CANX	Calnexin	P27824	CALX_HUMAN	1589.73	9042.56	7910
libDIA	P08575	P08575	PTPRC	Receptor-type tyrosine-protein phosphatase C	P08575	PTPRC_HUMAN	317979	291894	99296.5			dirDIA	P28066	P28066	PSMA5	Proteasome subunit alpha type-5	P28066	PSA5_HUMAN	Filtered	1332.42	5011.59
libDIA	P08621	P08621	SNRNP70	U1 small nuclear ribonucleoprotein 70 kDa	P08621	RU17_HUMAN	Filtered	1152.82	3204.12			dirDIA	P29401	P29401	TKT	Transketolase	P29401	TKT_HUMAN	4636.37	4411.2	6534.92
libDIA	P08758	P08758	ANXA5	Annexin A5	P08758	ANXA5_HUMAN	Filtered	3135.62	3414.98			dirDIA	P29692	P29692	EEF1D	Elongation factor 1-delta	P29692	EF1D_HUMAN	4737.34	3725.94	4867.77
libDIA	P08779	P08779	KRT16	Keratin, type I cytoskeletal 16	P08779	K1C16_HUMAN	Filtered	4920.1	7820.09			dirDIA	P30050	P30050	RPL12	60S ribosomal protein L12	P30050	RL12_HUMAN	57205.1	10368.4	9547.88
libDIA	P08865	P08865	RPSA	40S ribosomal protein SA	P08865	RSSA_HUMAN	41763.2	19255.8	15758.4			dirDIA	P30086	P30086	PEBP1	Phosphatidylethanolamine-binding protein 1	P30086	PEBP1_HUMAN	11756.3	10357.1	15871.1
libDIA	P09211	P09211	GSTP1	Glutathione S-transferase P	P09211	GSTP1_HUMAN	1592.84	3736.66	2778.03			dirDIA	P30101	P30101	PDIA3	Protein disulfide-isomerase A3	P30101	PDIA3_HUMAN	3857.98	2324.43	12379
libDIA	P09382	P09382	LGALS1	Galectin-1	P09382	LEG1_HUMAN	Filtered	Filtered	5274.48			dirDIA	P31025;Q5VSP4	P31025;Q5VSP4	LCN1;LCN1P1	Lipocalin-1;Putative lipocalin 1-like protein 1	P31025;Q5VSP4	LCN1_HUMAN;LC1L1_HUMAN	Filtered	2412.48	7212.44
libDIA	P09429	P09429	HMGB1	High mobility group protein B1	P09429	HMGB1_HUMAN	Filtered	4542.44	2054.39			dirDIA	P31146	P31146	CORO1A	Coronin-1A	P31146	COR1A_HUMAN	30850.7	5240.85	11647.8
libDIA	P09496	P09496	CLTA	Clathrin light chain A	P09496	CLCA_HUMAN	Filtered	Filtered	1424.31			dirDIA	P31151	P31151	S100A7	Protein S100-A7	P31151	S10A7_HUMAN	11394.5	15723.3	18007.3
libDIA	P09651	P09651	HNRNPA1	Heterogeneous nuclear ribonucleoprotein A1	P09651	ROA1_HUMAN	22730.5	17457.5	10012			dirDIA	P31943;P55795	P31943;P55795	HNRNPH1;HNRNPH2	Heterogeneous nuclear ribonucleoprotein H;Heterogeneous nuclear ribonucleoprotein H2	P31943;P55795	HNRH1_HUMAN;HNRH2_HUMAN	Filtered	1857.72	5059.94
libDIA	P09668	P09668	CTSH	Pro-cathepsin H	P09668	CATH_HUMAN	Filtered	Filtered	843.318			dirDIA	P31944	P31944	CASP14	Caspase-14	P31944	CASPE_HUMAN	8349.74	8753.85	4767.65
libDIA	P09874	P09874	PARP1	Poly [ADP-ribose] polymerase 1	P09874	PARP1_HUMAN	Filtered	3221.73	2342.69			dirDIA	P31948	P31948	STIP1	Stress-induced-phosphoprotein 1	P31948	STIP1_HUMAN	1.40057	1	2680.76
libDIA	P09972	P09972	ALDOC	Fructose-bisphosphate aldolase C	P09972	ALDOC_HUMAN	Filtered	Filtered	2915.22			dirDIA	P35030	P35030	PRSS3	Trypsin-3	P35030	TRY3_HUMAN	74560.9	11614.7	3974.82
libDIA	P0C0S5;Q71UI9	P0C0S5;Q71UI9	H2AFZ;H2AFV	Histone H2A.Z;Histone H2A.V	P0C0S5;Q71UI9	H2AZ_HUMAN;H2AV_HUMAN	27822.6	13980.7	5430.41			dirDIA	P35232	P35232	PHB	Prohibitin	P35232	PHB_HUMAN	11084.4	5420.75	4451.13
libDIA	P0C7P4;P47985	P0C7P4;P47985	UQCRFS1P1;UQCRFS1	Putative cytochrome b-c1 complex subunit Rieske-like protein 1;Cytochrome b-c1 complex subunit Rieske, mitochondrial	P0C7P4;P47985	UCRIL_HUMAN;UCRI_HUMAN	Filtered	Filtered	1262.47			dirDIA	P35268	P35268	RPL22	60S ribosomal protein L22	P35268	RL22_HUMAN	127970	17663.2	14158.5
libDIA	P0CG47;P0CG48;P62979;P62987	P0CG47;P0CG48;P62979;P62987	UBB;UBC;RPS27A;UBA52	Polyubiquitin-B;Polyubiquitin-C;Ubiquitin-40S ribosomal protein S27a;Ubiquitin-60S ribosomal protein L40	P0CG47;P0CG48;P62979;P62987	UBB_HUMAN;UBC_HUMAN;RS27A_HUMAN;RL40_HUMAN	54720.3	33904.3	27349.6			dirDIA	P35527	P35527	KRT9	Keratin, type I cytoskeletal 9	P35527	K1C9_HUMAN	96078	1.38393e+06	1.22791e+06
libDIA	P10412;P16402;P16403	P10412;P16402;P16403	HIST1H1E;HIST1H1D;HIST1H1C	Histone H1.4;Histone H1.3;Histone H1.2	P10412;P16402;P16403	H14_HUMAN;H13_HUMAN;H12_HUMAN	89614.8	50768.4	39417.7			dirDIA	P35579	P35579	MYH9	Myosin-9	P35579	MYH9_HUMAN	2968.48	1143.17	2495.88
libDIA	P10599	P10599	TXN	Thioredoxin	P10599	THIO_HUMAN	84934.5	33756.1	23573.4			dirDIA	P35908	P35908	KRT2	Keratin, type II cytoskeletal 2 epidermal	P35908	K22E_HUMAN	706945	1.11423e+06	672631
libDIA	P10809	P10809	HSPD1	60 kDa heat shock protein, mitochondrial	P10809	CH60_HUMAN	25036.2	13470.3	12076.1			dirDIA	P36578	P36578	RPL4	60S ribosomal protein L4	P36578	RL4_HUMAN	29017.5	4980.02	3713.48
libDIA	P11021	P11021	HSPA5	78 kDa glucose-regulated protein	P11021	GRP78_HUMAN	9815.33	6568.54	8353.46			dirDIA	P38646	P38646	HSPA9	Stress-70 protein, mitochondrial	P38646	GRP75_HUMAN	8981.96	3424.46	5096.79
libDIA	P11142	P11142	HSPA8	Heat shock cognate 71 kDa protein	P11142	HSP7C_HUMAN	94367.7	47623.5	45951.4			dirDIA	P39023	P39023	RPL3	60S ribosomal protein L3	P39023	RL3_HUMAN	18193.4	8077.33	7288.42
libDIA	P11226	P11226	MBL2	Mannose-binding protein C	P11226	MBL2_HUMAN	83879.8	59637.2	33793.3			dirDIA	P40429;Q6NVV1	P40429;Q6NVV1	RPL13A;RPL13AP3	60S ribosomal protein L13a;Putative 60S ribosomal protein L13a protein RPL13AP3	P40429;Q6NVV1	RL13A_HUMAN;R13P3_HUMAN	63070.6	10193.2	8580.71
libDIA	P11279	P11279	LAMP1	Lysosome-associated membrane glycoprotein 1	P11279	LAMP1_HUMAN	Filtered	6003.12	4035.66			dirDIA	P40925	P40925	MDH1	Malate dehydrogenase, cytoplasmic	P40925	MDHC_HUMAN	20874.3	8071.37	14392.5
libDIA	P11586	P11586	MTHFD1	C-1-tetrahydrofolate synthase, cytoplasmic	P11586	C1TC_HUMAN	14242.3	5319.06	4996.57			dirDIA	P40926	P40926	MDH2	Malate dehydrogenase, mitochondrial	P40926	MDHM_HUMAN	26166.7	15455.6	9793.37
libDIA	P11836	P11836	MS4A1	B-lymphocyte antigen CD20	P11836	CD20_HUMAN	7848.42	3068.53	3276.34			dirDIA	P42766	P42766	RPL35	60S ribosomal protein L35	P42766	RL35_HUMAN	44570.4	4365.74	6230.83
libDIA	P11940	P11940	PABPC1	Polyadenylate-binding protein 1	P11940	PABP1_HUMAN	16259.6	9993.1	5649.16			dirDIA	P46776	P46776	RPL27A	60S ribosomal protein L27a	P46776	RL27A_HUMAN	219365	46950.5	43975.5
libDIA	P12004	P12004	PCNA	Proliferating cell nuclear antigen	P12004	PCNA_HUMAN	Filtered	1432.05	4938.18			dirDIA	P46781	P46781	RPS9	40S ribosomal protein S9	P46781	RS9_HUMAN	139066	31085.5	24469.8
libDIA	P12236	P12236	SLC25A6	ADP/ATP translocase 3	P12236	ADT3_HUMAN	7913.25	5078.44	2491.61			dirDIA	P46782	P46782	RPS5	40S ribosomal protein S5	P46782	RS5_HUMAN	59927.9	4326.4	12771.2
libDIA	P12268	P12268	IMPDH2	Inosine-5'-monophosphate dehydrogenase 2	P12268	IMDH2_HUMAN	13662	8107.26	4106.83			dirDIA	P46783	P46783	RPS10	40S ribosomal protein S10	P46783	RS10_HUMAN	16462	11097.7	6765.59
libDIA	P12956	P12956	XRCC6	X-ray repair cross-complementing protein 6	P12956	XRCC6_HUMAN	13690	10740.1	5727.6			dirDIA	P47929	P47929	LGALS7	Galectin-7	P47929	LEG7_HUMAN	2.05694	16533.6	2280.74
libDIA	P13010	P13010	XRCC5	X-ray repair cross-complementing protein 5	P13010	XRCC5_HUMAN	12305.7	6608.31	4135.08			dirDIA	P48357	P48357	LEPR	Leptin receptor	P48357	LEPR_HUMAN	223618	534888	219923
libDIA	P13073	P13073	COX4I1	Cytochrome c oxidase subunit 4 isoform 1, mitochondrial	P13073	COX41_HUMAN	Filtered	3313.44	2223.2			dirDIA	P49321	P49321	NASP	Nuclear autoantigenic sperm protein	P49321	NASP_HUMAN	Filtered	1229.9	8420.17
libDIA	P13489	P13489	RNH1	Ribonuclease inhibitor	P13489	RINI_HUMAN	Filtered	Filtered	1121.5			dirDIA	P49411	P49411	TUFM	Elongation factor Tu, mitochondrial	P49411	EFTU_HUMAN	6941.64	6966.05	2662.15
libDIA	P13639	P13639	EEF2	Elongation factor 2	P13639	EF2_HUMAN	115771	45684.8	50215.7			dirDIA	P50395	P50395	GDI2	Rab GDP dissociation inhibitor beta	P50395	GDIB_HUMAN	3773.17	2590.49	4664.82
libDIA	P13645	P13645	KRT10	Keratin, type I cytoskeletal 10	P13645	K1C10_HUMAN	1.43498e+06	2111157	1.35837e+06			dirDIA	P50914	P50914	RPL14	60S ribosomal protein L14	P50914	RL14_HUMAN	125690	45787	27043.9
libDIA	P13647	P13647	KRT5	Keratin, type II cytoskeletal 5	P13647	K2C5_HUMAN	141721	410003	192505			dirDIA	P50990	P50990	CCT8	T-complex protein 1 subunit theta	P50990	TCPQ_HUMAN	20963.3	5128.38	6329.78
libDIA	P13667	P13667	PDIA4	Protein disulfide-isomerase A4	P13667	PDIA4_HUMAN	Filtered	1514.05	2703.3			dirDIA	P50991	P50991	CCT4	T-complex protein 1 subunit delta	P50991	TCPD_HUMAN	30412.9	18561.3	15175.8
libDIA	P13796	P13796	LCP1	Plastin-2	P13796	PLSL_HUMAN	52885.2	24015.9	26612			dirDIA	P52565	P52565	ARHGDIA	Rho GDP-dissociation inhibitor 1	P52565	GDIR1_HUMAN	1.48611	1	6849.64
libDIA	P14618	P14618	PKM	Pyruvate kinase PKM	P14618	KPYM_HUMAN	99096.5	46617.2	42120			dirDIA	P55209;Q99733	P55209;Q99733	NAP1L1;NAP1L4	Nucleosome assembly protein 1-like 1;Nucleosome assembly protein 1-like 4	P55209;Q99733	NP1L1_HUMAN;NP1L4_HUMAN	17304.3	5301.38	6857.88
libDIA	P14625	P14625	HSP90B1	Endoplasmin	P14625	ENPL_HUMAN	19702.9	12588.1	14694.5			dirDIA	P55854;P61956;Q6EEV6	P55854;P61956;Q6EEV6	SUMO3;SUMO2;SUMO4	Small ubiquitin-related modifier 3;Small ubiquitin-related modifier 2;Small ubiquitin-related modifier 4	P55854;P61956;Q6EEV6	SUMO3_HUMAN;SUMO2_HUMAN;SUMO4_HUMAN	10574.7	1271.3	11266.1
libDIA	P14678;P63162	P14678;P63162	SNRPB;SNRPN	Small nuclear ribonucleoprotein-associated proteins B and B';Small nuclear ribonucleoprotein-associated protein N	P14678;P63162	RSMB_HUMAN;RSMN_HUMAN	Filtered	3849.64	5671.85			dirDIA	P55957	P55957	BID	BH3-interacting domain death agonist	P55957	BID_HUMAN	Filtered	1	2601.77
libDIA	P14866	P14866	HNRNPL	Heterogeneous nuclear ribonucleoprotein L	P14866	HNRPL_HUMAN	Filtered	1970.87	1095.95			dirDIA	P60174	P60174	TPI1	Triosephosphate isomerase	P60174	TPIS_HUMAN	4106.66	2684.48	8180.69
libDIA	P14923	P14923	JUP	Junction plakoglobin	P14923	PLAK_HUMAN	Filtered	21089.1	10274.8			dirDIA	P60709;P63261	P60709;P63261	ACTB;ACTG1	Actin, cytoplasmic 1;Actin, cytoplasmic 2	P60709;P63261	ACTB_HUMAN;ACTG_HUMAN	1.14813e+06	159297	510872
libDIA	P15121	P15121	AKR1B1	Aldose reductase	P15121	ALDR_HUMAN	Filtered	3201.95	4453.57			dirDIA	P60842	P60842	EIF4A1	Eukaryotic initiation factor 4A-I	P60842	IF4A1_HUMAN	33949.2	10748	16551.2
libDIA	P15153	P15153	RAC2	Ras-related C3 botulinum toxin substrate 2	P15153	RAC2_HUMAN	25447.9	7516.54	6544.88			dirDIA	P60866	P60866	RPS20	40S ribosomal protein S20	P60866	RS20_HUMAN	Filtered	9804.27	16080.6
libDIA	P15311	P15311	EZR	Ezrin	P15311	EZRI_HUMAN	Filtered	Filtered	2651.05			dirDIA	P60900	P60900	PSMA6	Proteasome subunit alpha type-6	P60900	PSA6_HUMAN	7922.05	6340.6	8168.6
libDIA	P15531	P15531	NME1	Nucleoside diphosphate kinase A	P15531	NDKA_HUMAN	53033.7	15626.4	24265.5			dirDIA	P61247	P61247	RPS3A	40S ribosomal protein S3a	P61247	RS3A_HUMAN	13841.8	1114.79	6387.3
libDIA	P15880	P15880	RPS2	40S ribosomal protein S2	P15880	RS2_HUMAN	50790.3	10948.2	7811.64			dirDIA	P61604	P61604	HSPE1	10 kDa heat shock protein, mitochondrial	P61604	CH10_HUMAN	30785.7	20102.9	25045
libDIA	P15924	P15924	DSP	Desmoplakin	P15924	DESP_HUMAN	Filtered	27172.5	11812.3			dirDIA	P61626	P61626	LYZ	Lysozyme C	P61626	LYSC_HUMAN	5995.46	25661.8	4867.09
libDIA	P16070	P16070	CD44	CD44 antigen	P16070	CD44_HUMAN	Filtered	Filtered	917.276			dirDIA	P61978	P61978	HNRNPK	Heterogeneous nuclear ribonucleoprotein K	P61978	HNRPK_HUMAN	8010.1	6074	6718.31
libDIA	P16401	P16401	HIST1H1B	Histone H1.5	P16401	H15_HUMAN	76661.7	36261.4	36660.9			dirDIA	P61981	P61981	YWHAG	14-3-3 protein gamma	P61981	1433G_HUMAN	Filtered	147.167	7137.23
libDIA	P16949	P16949	STMN1	Stathmin	P16949	STMN1_HUMAN	14571	8251.22	9989.67			dirDIA	P62081	P62081	RPS7	40S ribosomal protein S7	P62081	RS7_HUMAN	25708.6	7619.46	8377.99
libDIA	P17174	P17174	GOT1	Aspartate aminotransferase, cytoplasmic	P17174	AATC_HUMAN	Filtered	1891.22	1915.62			dirDIA	P62158	P62158	CALM1	Calmodulin	P62158	CALM_HUMAN	1363.17	2814.28	6168.19
libDIA	P17844	P17844	DDX5	Probable ATP-dependent RNA helicase DDX5	P17844	DDX5_HUMAN	13769.1	7060.28	3798.26			dirDIA	P62241	P62241	RPS8	40S ribosomal protein S8	P62241	RS8_HUMAN	27479	7608.51	8317.58
libDIA	P17987	P17987	TCP1	T-complex protein 1 subunit alpha	P17987	TCPA_HUMAN	Filtered	7225.21	5834.54			dirDIA	P62249	P62249	RPS16	40S ribosomal protein S16	P62249	RS16_HUMAN	63919.1	18090.3	15642.7
libDIA	P18077	P18077	RPL35A	60S ribosomal protein L35a	P18077	RL35A_HUMAN	13305.9	5495.51	10702			dirDIA	P62258	P62258	YWHAE	14-3-3 protein epsilon	P62258	1433E_HUMAN	Filtered	1226.6	5512.76
libDIA	P18124	P18124	RPL7	60S ribosomal protein L7	P18124	RL7_HUMAN	36899	4975.59	7977.5			dirDIA	P62263	P62263	RPS14	40S ribosomal protein S14	P62263	RS14_HUMAN	64458.6	8881.02	16384.9
libDIA	P18621	P18621	RPL17	60S ribosomal protein L17	P18621	RL17_HUMAN	34658.5	9120.25	13845.1			dirDIA	P62266	P62266	RPS23	40S ribosomal protein S23	P62266	RS23_HUMAN	60731.8	25719.8	12786.7
libDIA	P18669	P18669	PGAM1	Phosphoglycerate mutase 1	P18669	PGAM1_HUMAN	Filtered	2504.76	3470.34			dirDIA	P62269	P62269	RPS18	40S ribosomal protein S18	P62269	RS18_HUMAN	22368	6281.66	11465.8
libDIA	P18754	P18754	RCC1	Regulator of chromosome condensation	P18754	RCC1_HUMAN	Filtered	1760.35	1568.65			dirDIA	P62318	P62318	SNRPD3	Small nuclear ribonucleoprotein Sm D3	P62318	SMD3_HUMAN	14713.4	4575.93	2861.2
libDIA	P18859	P18859	ATP5J	ATP synthase-coupling factor 6, mitochondrial	P18859	ATP5J_HUMAN	Filtered	Filtered	4383.43			dirDIA	P62424	P62424	RPL7A	60S ribosomal protein L7a	P62424	RL7A_HUMAN	32597.5	7127.09	9558.29
libDIA	P19338	P19338	NCL	Nucleolin	P19338	NUCL_HUMAN	54905.3	23663.3	16219.5			dirDIA	P62701	P62701	RPS4X	40S ribosomal protein S4, X isoform	P62701	RS4X_HUMAN	31045.7	8371.37	6474.09
libDIA	P19623	P19623	SRM	Spermidine synthase	P19623	SPEE_HUMAN	Filtered	3945.14	2305.82			dirDIA	P62736;P63267;P68032;P68133	P62736;P63267;P68032;P68133	ACTA2;ACTG2;ACTC1;ACTA1	Actin, aortic smooth muscle;Actin, gamma-enteric smooth muscle;Actin, alpha cardiac muscle 1;Actin, alpha skeletal muscle	P62736;P63267;P68032;P68133	ACTA_HUMAN;ACTH_HUMAN;ACTC_HUMAN;ACTS_HUMAN	957.104	4073.01	7541.71
libDIA	P19784	P19784	CSNK2A2	Casein kinase II subunit alpha'	P19784	CSK22_HUMAN	Filtered	Filtered	1363.59			dirDIA	P62750	P62750	RPL23A	60S ribosomal protein L23a	P62750	RL23A_HUMAN	33645.2	7027.79	9357.48
libDIA	P20073	P20073	ANXA7	Annexin A7	P20073	ANXA7_HUMAN	Filtered	3072.64	793.095			dirDIA	P62753	P62753	RPS6	40S ribosomal protein S6	P62753	RS6_HUMAN	60723.1	30088.2	13560.5
libDIA	P20290	P20290	BTF3	Transcription factor BTF3	P20290	BTF3_HUMAN	Filtered	6077.96	2932.15			dirDIA	P62805	P62805	HIST1H4A	Histone H4	P62805	H4_HUMAN	1.34684e+06	370424	249662
libDIA	P20618	P20618	PSMB1	Proteasome subunit beta type-1	P20618	PSB1_HUMAN	9753.95	7635.6	6174.67			dirDIA	P62826	P62826	RAN	GTP-binding nuclear protein Ran	P62826	RAN_HUMAN	108853	18737.4	40419.3
libDIA	P20674	P20674	COX5A	Cytochrome c oxidase subunit 5A, mitochondrial	P20674	COX5A_HUMAN	Filtered	1369.79	3359.83			dirDIA	P62829	P62829	RPL23	60S ribosomal protein L23	P62829	RL23_HUMAN	15054	3010.84	3168.67
libDIA	P20700	P20700	LMNB1	Lamin-B1	P20700	LMNB1_HUMAN	3276.2	2952.14	1523.01			dirDIA	P62847	P62847	RPS24	40S ribosomal protein S24	P62847	RS24_HUMAN	10447.2	14340.1	8978.3
libDIA	P21796	P21796	VDAC1	Voltage-dependent anion-selective channel protein 1	P21796	VDAC1_HUMAN	Filtered	3316.49	2655.9			dirDIA	P62851	P62851	RPS25	40S ribosomal protein S25	P62851	RS25_HUMAN	108085	20031.6	19209.8
libDIA	P22087	P22087	FBL	rRNA 2'-O-methyltransferase fibrillarin	P22087	FBRL_HUMAN	Filtered	1068.06	803.767			dirDIA	P62854;Q5JNZ5	P62854;Q5JNZ5	RPS26;RPS26P11	40S ribosomal protein S26;Putative 40S ribosomal protein S26-like 1	P62854;Q5JNZ5	RS26_HUMAN;RS26L_HUMAN	129092	23198.5	44058.9
libDIA	P22102	P22102	GART	Trifunctional purine biosynthetic protein adenosine-3	P22102	PUR2_HUMAN	7974.03	5386.83	5836.23			dirDIA	P62857	P62857	RPS28	40S ribosomal protein S28	P62857	RS28_HUMAN	53188.5	30564.4	25370.8
libDIA	P22234	P22234	PAICS	Multifunctional protein ADE2	P22234	PUR6_HUMAN	7967.94	1745.11	2054.15			dirDIA	P62861	P62861	FAU	40S ribosomal protein S30	P62861	RS30_HUMAN	44258.6	13824	13342.3
libDIA	P22314	P22314	UBA1	Ubiquitin-like modifier-activating enzyme 1	P22314	UBA1_HUMAN	Filtered	Filtered	2341.23			dirDIA	P62913	P62913	RPL11	60S ribosomal protein L11	P62913	RL11_HUMAN	58126.5	17527.1	14215.6
libDIA	P22626	P22626	HNRNPA2B1	Heterogeneous nuclear ribonucleoproteins A2/B1	P22626	ROA2_HUMAN	101361	57064.7	36515.4			dirDIA	P62917	P62917	RPL8	60S ribosomal protein L8	P62917	RL8_HUMAN	19191.8	15930.6	18691.6
libDIA	P22735	P22735	TGM1	Protein-glutamine gamma-glutamyltransferase K	P22735	TGM1_HUMAN	Filtered	9300.8	4233.65			dirDIA	P62937	P62937	PPIA	Peptidyl-prolyl cis-trans isomerase A	P62937	PPIA_HUMAN	190623	61794.5	100040
libDIA	P23246	P23246	SFPQ	Splicing factor, proline- and glutamine-rich	P23246	SFPQ_HUMAN	50971.6	3645.61	29444.2			dirDIA	P62942	P62942	FKBP1A	Peptidyl-prolyl cis-trans isomerase FKBP1A	P62942	FKB1A_HUMAN	Filtered	2167.51	12378.8
libDIA	P23284	P23284	PPIB	Peptidyl-prolyl cis-trans isomerase B	P23284	PPIB_HUMAN	12207.3	8100.5	5868.19			dirDIA	P63104	P63104	YWHAZ	14-3-3 protein zeta/delta	P63104	1433Z_HUMAN	5397.68	2417.31	10889.4
libDIA	P23396	P23396	RPS3	40S ribosomal protein S3	P23396	RS3_HUMAN	85091.9	34364.5	26239.5			dirDIA	P63173	P63173	RPL38	60S ribosomal protein L38	P63173	RL38_HUMAN	Filtered	6909.95	890.778
libDIA	P23526	P23526	AHCY	Adenosylhomocysteinase	P23526	SAHH_HUMAN	10301.3	5986.56	8415.1			dirDIA	P63208	P63208	SKP1	S-phase kinase-associated protein 1	P63208	SKP1_HUMAN	Filtered	370.064	4037.78
libDIA	P23528	P23528	CFL1	Cofilin-1	P23528	COF1_HUMAN	26559	9684.78	20494.9			dirDIA	P63220	P63220	RPS21	40S ribosomal protein S21	P63220	RS21_HUMAN	1.90154	510.22	7412.93
libDIA	P23919	P23919	DTYMK	Thymidylate kinase	P23919	KTHY_HUMAN	34574.5	8605.29	2123.51			dirDIA	P63241;Q6IS14;Q9GZV4	P63241;Q6IS14;Q9GZV4	EIF5A;EIF5AL1;EIF5A2	Eukaryotic translation initiation factor 5A-1;Eukaryotic translation initiation factor 5A-1-like;Eukaryotic translation initiation factor 5A-2	P63241;Q6IS14;Q9GZV4	IF5A1_HUMAN;IF5AL_HUMAN;IF5A2_HUMAN	3.14242	8396.67	6468.66
libDIA	P24534	P24534	EEF1B2	Elongation factor 1-beta	P24534	EF1B_HUMAN	42223.2	20099.2	12533.2			dirDIA	P63244	P63244	GNB2L1	Guanine nucleotide-binding protein subunit beta-2-like 1	P63244	GBLP_HUMAN	41867.8	10095.6	24728.2
libDIA	P24539	P24539	ATP5F1	ATP synthase F(0) complex subunit B1, mitochondrial	P24539	AT5F1_HUMAN	Filtered	4692.72	2722.73			dirDIA	P68104	P68104	EEF1A1	Elongation factor 1-alpha 1	P68104	EF1A1_HUMAN	828547	165953	170718
libDIA	P24666	P24666	ACP1	Low molecular weight phosphotyrosine protein phosphatase	P24666	PPAC_HUMAN	5573.96	2150.74	3899.68			dirDIA	P68363;Q71U36;Q9BQE3	P68363;Q71U36;Q9BQE3	TUBA1B;TUBA1A;TUBA1C	Tubulin alpha-1B chain;Tubulin alpha-1A chain;Tubulin alpha-1C chain	P68363;Q71U36;Q9BQE3	TBA1B_HUMAN;TBA1A_HUMAN;TBA1C_HUMAN	76831.6	43736.8	33888.3
libDIA	P25205	P25205	MCM3	DNA replication licensing factor MCM3	P25205	MCM3_HUMAN	12477.2	2752.68	2561.77			dirDIA	P68371	P68371	TUBB4B	Tubulin beta-4B chain	P68371	TBB4B_HUMAN	197927	81791.5	66268.8
libDIA	P25398	P25398	RPS12	40S ribosomal protein S12	P25398	RS12_HUMAN	17118.8	4874.32	6908.15			dirDIA	P68431;P84243;Q16695;Q6NXT2;Q71DI3	P68431;P84243;Q16695;Q6NXT2;Q71DI3	HIST1H3A;H3F3A;HIST3H3;H3F3C;HIST2H3A	Histone H3.1;Histone H3.3;Histone H3.1t;Histone H3.3C;Histone H3.2	P68431;P84243;Q16695;Q6NXT2;Q71DI3	H31_HUMAN;H33_HUMAN;H31T_HUMAN;H3C_HUMAN;H32_HUMAN	214885	30777.5	36130.3
libDIA	P25705	P25705	ATP5A1	ATP synthase subunit alpha, mitochondrial	P25705	ATPA_HUMAN	54613.5	30606.3	19369.5			dirDIA	P78371	P78371	CCT2	T-complex protein 1 subunit beta	P78371	TCPB_HUMAN	17946	2700.87	6581.12
libDIA	P25786	P25786	PSMA1	Proteasome subunit alpha type-1	P25786	PSA1_HUMAN	15409.1	5633.32	4531.85			dirDIA	P78395	P78395	PRAME	Melanoma antigen preferentially expressed in tumors	P78395	PRAME_HUMAN	106094	185412	69116
libDIA	P25787	P25787	PSMA2	Proteasome subunit alpha type-2	P25787	PSA2_HUMAN	Filtered	1719.02	3430.39			dirDIA	P81605	P81605	DCD	Dermcidin	P81605	DCD_HUMAN	100691	48341.6	68634.8
libDIA	P25788	P25788	PSMA3	Proteasome subunit alpha type-3	P25788	PSA3_HUMAN	Filtered	4234.36	4818.98			dirDIA	P83731	P83731	RPL24	60S ribosomal protein L24	P83731	RL24_HUMAN	23007.6	6117.9	4025.08
libDIA	P25789	P25789	PSMA4	Proteasome subunit alpha type-4	P25789	PSA4_HUMAN	29303.5	9872.76	10116.1			dirDIA	P84103	P84103	SRSF3	Serine/arginine-rich splicing factor 3	P84103	SRSF3_HUMAN	31204.8	14659.8	10073.5
libDIA	P26038	P26038	MSN	Moesin	P26038	MOES_HUMAN	7103.03	7027.41	8841.37			dirDIA	Q01105	Q01105	SET	Protein SET	Q01105	SET_HUMAN	77681.5	5467.88	9964.03
libDIA	P26373	P26373	RPL13	60S ribosomal protein L13	P26373	RL13_HUMAN	28738.1	9484.09	8350.64			dirDIA	Q02413	Q02413	DSG1	Desmoglein-1	Q02413	DSG1_HUMAN	1.74238	4168.98	2510
libDIA	P26583	P26583	HMGB2	High mobility group protein B2	P26583	HMGB2_HUMAN	12122.4	1269.05	802.331			dirDIA	Q02878	Q02878	RPL6	60S ribosomal protein L6	Q02878	RL6_HUMAN	4716.6	1465.11	1841.94
libDIA	P26641	P26641	EEF1G	Elongation factor 1-gamma	P26641	EF1G_HUMAN	41693.5	13835.7	19321.2			dirDIA	Q06323	Q06323	PSME1	Proteasome activator complex subunit 1	Q06323	PSME1_HUMAN	2.15129	853.909	2424.83
libDIA	P27348	P27348	YWHAQ	14-3-3 protein theta	P27348	1433T_HUMAN	Filtered	255.783	3719.53			dirDIA	Q06830	Q06830	PRDX1	Peroxiredoxin-1	Q06830	PRDX1_HUMAN	113378	43100.6	64267
libDIA	P27695	P27695	APEX1	DNA-(apurinic or apyrimidinic site) lyase	P27695	APEX1_HUMAN	7218.95	Filtered	1867.75			dirDIA	Q07020	Q07020	RPL18	60S ribosomal protein L18	Q07020	RL18_HUMAN	56692.9	27959.1	13399.3
libDIA	P27797	P27797	CALR	Calreticulin	P27797	CALR_HUMAN	Filtered	3996.63	1881.13			dirDIA	Q08188	Q08188	TGM3	Protein-glutamine gamma-glutamyltransferase E	Q08188	TGM3_HUMAN	8338	10360	6291.57
libDIA	P27824	P27824	CANX	Calnexin	P27824	CALX_HUMAN	Filtered	Filtered	2787.46			dirDIA	Q08554	Q08554	DSC1	Desmocollin-1	Q08554	DSC1_HUMAN	Filtered	9048.86	8877.85
libDIA	P28062	P28062	PSMB8	Proteasome subunit beta type-8	P28062	PSB8_HUMAN	Filtered	2876.01	1500.92			dirDIA	Q13404;Q15819	Q13404;Q15819	UBE2V1;UBE2V2	Ubiquitin-conjugating enzyme E2 variant 1;Ubiquitin-conjugating enzyme E2 variant 2	Q13404;Q15819	UB2V1_HUMAN;UB2V2_HUMAN	2.30729	370.572	2775.19
libDIA	P28065	P28065	PSMB9	Proteasome subunit beta type-9	P28065	PSB9_HUMAN	Filtered	Filtered	613.226			dirDIA	Q13835	Q13835	PKP1	Plakophilin-1	Q13835	PKP1_HUMAN	Filtered	6945.73	2746.77
libDIA	P28066	P28066	PSMA5	Proteasome subunit alpha type-5	P28066	PSA5_HUMAN	Filtered	2335.15	5228.89			dirDIA	Q13867	Q13867	BLMH	Bleomycin hydrolase	Q13867	BLMH_HUMAN	15015.9	47919.1	13292.8
libDIA	P28070	P28070	PSMB4	Proteasome subunit beta type-4	P28070	PSB4_HUMAN	Filtered	Filtered	1178.99			dirDIA	Q14103	Q14103	HNRNPD	Heterogeneous nuclear ribonucleoprotein D0	Q14103	HNRPD_HUMAN	41817.2	13571	11824.8
libDIA	P28072	P28072	PSMB6	Proteasome subunit beta type-6	P28072	PSB6_HUMAN	Filtered	6436.55	4758.19			dirDIA	Q15056	Q15056	EIF4H	Eukaryotic translation initiation factor 4H	Q15056	IF4H_HUMAN	32137	7188.12	9107.56
libDIA	P28074	P28074	PSMB5	Proteasome subunit beta type-5	P28074	PSB5_HUMAN	Filtered	1686.15	1410.68			dirDIA	Q15084	Q15084	PDIA6	Protein disulfide-isomerase A6	Q15084	PDIA6_HUMAN	9023.66	6733.41	6182.83
libDIA	P28838	P28838	LAP3	Cytosol aminopeptidase	P28838	AMPL_HUMAN	6931.98	3180.32	2076.34			dirDIA	Q16851	Q16851	UGP2	UTP--glucose-1-phosphate uridylyltransferase	Q16851	UGPA_HUMAN	Filtered	88209.2	18259.2
libDIA	P29350	P29350	PTPN6	Tyrosine-protein phosphatase non-receptor type 6	P29350	PTN6_HUMAN	Filtered	4471.63	2809.39			dirDIA	Q3SY84;Q7RTS7;Q86Y46	Q3SY84;Q7RTS7;Q86Y46	KRT71;KRT74;KRT73	Keratin, type II cytoskeletal 71;Keratin, type II cytoskeletal 74;Keratin, type II cytoskeletal 73	Q3SY84;Q7RTS7;Q86Y46	K2C71_HUMAN;K2C74_HUMAN;K2C73_HUMAN	4162.02	7899.26	7655.05
libDIA	P29401	P29401	TKT	Transketolase	P29401	TKT_HUMAN	Filtered	5621.09	5600.54			dirDIA	Q5D862	Q5D862	FLG2	Filaggrin-2	Q5D862	FILA2_HUMAN	29129.8	30340	19155.1
libDIA	P29508	P29508	SERPINB3	Serpin B3	P29508	SPB3_HUMAN	25603.1	15716.4	7501.53			dirDIA	Q5T749	Q5T749	KPRP	Keratinocyte proline-rich protein	Q5T749	KPRP_HUMAN	Filtered	34848.1	12844.4
libDIA	P29692	P29692	EEF1D	Elongation factor 1-delta	P29692	EF1D_HUMAN	18056	7220.66	8448.32			dirDIA	Q5T750	Q5T750	XP32	Skin-specific protein 32	Q5T750	XP32_HUMAN	150018	115292	84785
libDIA	P30040	P30040	ERP29	Endoplasmic reticulum resident protein 29	P30040	ERP29_HUMAN	Filtered	2662.9	1523.73			dirDIA	Q7KZF4	Q7KZF4	SND1	Staphylococcal nuclease domain-containing protein 1	Q7KZF4	SND1_HUMAN	3095.09	2837.9	2042.26
libDIA	P30041	P30041	PRDX6	Peroxiredoxin-6	P30041	PRDX6_HUMAN	3993.32	4720.69	5212.83			dirDIA	Q7Z794	Q7Z794	KRT77	Keratin, type II cytoskeletal 1b	Q7Z794	K2C1B_HUMAN	16188	12116.3	8258.17
libDIA	P30048	P30048	PRDX3	Thioredoxin-dependent peroxide reductase, mitochondrial	P30048	PRDX3_HUMAN	8651.79	8219.86	6112.51			dirDIA	Q8IXS2	Q8IXS2	CCDC65	Coiled-coil domain-containing protein 65	Q8IXS2	CCD65_HUMAN	335036	17186256	164204
libDIA	P30049	P30049	ATP5D	ATP synthase subunit delta, mitochondrial	P30049	ATPD_HUMAN	Filtered	1512.81	4405.67			dirDIA	Q8N1N4	Q8N1N4	KRT78	Keratin, type II cytoskeletal 78	Q8N1N4	K2C78_HUMAN	138540	12658.4	7034.06
libDIA	P30050	P30050	RPL12	60S ribosomal protein L12	P30050	RL12_HUMAN	48600.9	11449.8	5833.36			dirDIA	Q96P63	Q96P63	SERPINB12	Serpin B12	Q96P63	SPB12_HUMAN	12839.3	19537.1	10729
libDIA	P30086	P30086	PEBP1	Phosphatidylethanolamine-binding protein 1	P30086	PEBP1_HUMAN	6386.39	5615.48	5381.93			dirDIA	Q99832	Q99832	CCT7	T-complex protein 1 subunit eta	Q99832	TCPH_HUMAN	3401.25	4004.8	3889.48
libDIA	P30101	P30101	PDIA3	Protein disulfide-isomerase A3	P30101	PDIA3_HUMAN	6644.93	6380.1	14044.4			dirDIA	Q9H3K6	Q9H3K6	BOLA2	BolA-like protein 2	Q9H3K6	BOLA2_HUMAN	Filtered	Filtered	825.121
libDIA	P30466	P30466	HLA-B	HLA class I histocompatibility antigen, B-18 alpha chain	P30466	1B18_HUMAN	Filtered	2747.6	4986.47			dirDIA	Q9UQ80	Q9UQ80	PA2G4	Proliferation-associated protein 2G4	Q9UQ80	PA2G4_HUMAN	14603.4	6042.26	7765.23
libDIA	P30520	P30520	ADSS	Adenylosuccinate synthetase isozyme 2	P30520	PURA2_HUMAN	Filtered	Filtered	1228.25
libDIA	P31146	P31146	CORO1A	Coronin-1A	P31146	COR1A_HUMAN	32398.2	10207.1	14718
libDIA	P31151	P31151	S100A7	Protein S100-A7	P31151	S10A7_HUMAN	9137.09	21197.1	27196.2
libDIA	P31153	P31153	MAT2A	S-adenosylmethionine synthase isoform type-2	P31153	METK2_HUMAN	2881.51	Filtered	2358.44
libDIA	P31483;Q01085	P31483;Q01085	TIA1;TIAL1	Nucleolysin TIA-1 isoform p40;Nucleolysin TIAR	P31483;Q01085	TIA1_HUMAN;TIAR_HUMAN	Filtered	Filtered	1069.16
libDIA	P31939	P31939	ATIC	Bifunctional purine biosynthesis protein PURH	P31939	PUR9_HUMAN	5022.65	2306.84	5081.7
libDIA	P31943	P31943	HNRNPH1	Heterogeneous nuclear ribonucleoprotein H	P31943	HNRH1_HUMAN	9385.59	8521.79	5679.93
libDIA	P31944	P31944	CASP14	Caspase-14	P31944	CASPE_HUMAN	7705.69	10064.6	4202.7
libDIA	P31946	P31946	YWHAB	14-3-3 protein beta/alpha	P31946	1433B_HUMAN	7073.03	2482	4389.86
libDIA	P31948	P31948	STIP1	Stress-induced-phosphoprotein 1	P31948	STIP1_HUMAN	15166.5	5319.57	9505.3
libDIA	P32119	P32119	PRDX2	Peroxiredoxin-2	P32119	PRDX2_HUMAN	14105.4	9125.5	8906.45
libDIA	P32969	P32969	RPL9	60S ribosomal protein L9	P32969	RL9_HUMAN	8093.46	3365.13	3487.81
libDIA	P33316	P33316	DUT	Deoxyuridine 5'-triphosphate nucleotidohydrolase, mitochondrial	P33316	DUT_HUMAN	Filtered	2584.15	2225.15
libDIA	P33991	P33991	MCM4	DNA replication licensing factor MCM4	P33991	MCM4_HUMAN	Filtered	Filtered	891.083
libDIA	P33992	P33992	MCM5	DNA replication licensing factor MCM5	P33992	MCM5_HUMAN	Filtered	1608.16	391.849
libDIA	P33993	P33993	MCM7	DNA replication licensing factor MCM7	P33993	MCM7_HUMAN	42997.8	168860	2290.7
libDIA	P34897	P34897	SHMT2	Serine hydroxymethyltransferase, mitochondrial	P34897	GLYM_HUMAN	Filtered	2501.92	3564
libDIA	P34932	P34932	HSPA4	Heat shock 70 kDa protein 4	P34932	HSP74_HUMAN	Filtered	Filtered	1086.19
libDIA	P35030	P35030	PRSS3	Trypsin-3	P35030	TRY3_HUMAN	55338.6	14044.1	4598.33
libDIA	P35232	P35232	PHB	Prohibitin	P35232	PHB_HUMAN	10736.6	9154.03	4941.08
libDIA	P35268	P35268	RPL22	60S ribosomal protein L22	P35268	RL22_HUMAN	108459	24259.4	15390.9
libDIA	P35527	P35527	KRT9	Keratin, type I cytoskeletal 9	P35527	K1C9_HUMAN	80131	1.75506e+06	1259822
libDIA	P35579	P35579	MYH9	Myosin-9	P35579	MYH9_HUMAN	21231.7	7634.59	6098.99
libDIA	P35613	P35613	BSG	Basigin	P35613	BASI_HUMAN	Filtered	Filtered	2173.9
libDIA	P35637	P35637	FUS	RNA-binding protein FUS	P35637	FUS_HUMAN	Filtered	14874.4	6781.49
libDIA	P35908	P35908	KRT2	Keratin, type II cytoskeletal 2 epidermal	P35908	K22E_HUMAN	337707	1.13212e+06	653078
libDIA	P36542	P36542	ATP5C1	ATP synthase subunit gamma, mitochondrial	P36542	ATPG_HUMAN	Filtered	3408.51	1871.41
libDIA	P36578	P36578	RPL4	60S ribosomal protein L4	P36578	RL4_HUMAN	18759.4	4521.33	3481.57
libDIA	P36873	P36873	PPP1CC	Serine/threonine-protein phosphatase PP1-gamma catalytic subunit	P36873	PP1G_HUMAN	Filtered	Filtered	769.713
libDIA	P36957	P36957	DLST	Dihydrolipoyllysine-residue succinyltransferase component of 2-oxoglutarate dehydrogenase complex, mitochondrial	P36957	ODO2_HUMAN	13447.1	9539.74	2715.61
libDIA	P37802	P37802	TAGLN2	Transgelin-2	P37802	TAGL2_HUMAN	Filtered	2135.98	3938.2
libDIA	P37837	P37837	TALDO1	Transaldolase	P37837	TALDO_HUMAN	5611.83	13563.6	8887.7
libDIA	P38646	P38646	HSPA9	Stress-70 protein, mitochondrial	P38646	GRP75_HUMAN	14568.1	13902.3	9294.31
libDIA	P38919	P38919	EIF4A3	Eukaryotic initiation factor 4A-III	P38919	IF4A3_HUMAN	Filtered	1075.14	1521.86
libDIA	P39019	P39019	RPS19	40S ribosomal protein S19	P39019	RS19_HUMAN	23219.2	7620.91	7348.01
libDIA	P39023	P39023	RPL3	60S ribosomal protein L3	P39023	RL3_HUMAN	12991.3	11136.9	5840.38
libDIA	P39656	P39656	DDOST	Dolichyl-diphosphooligosaccharide--protein glycosyltransferase 48 kDa subunit	P39656	OST48_HUMAN	3246	3685.63	2047.35
libDIA	P39687	P39687	ANP32A	Acidic leucine-rich nuclear phosphoprotein 32 family member A	P39687	AN32A_HUMAN	5291.95	4274.09	7744.63
libDIA	P39748	P39748	FEN1	Flap endonuclease 1	P39748	FEN1_HUMAN	20367.4	3918.95	1839.65
libDIA	P40227	P40227	CCT6A	T-complex protein 1 subunit zeta	P40227	TCPZ_HUMAN	9238.02	2659.47	4537.29
libDIA	P40429	P40429	RPL13A	60S ribosomal protein L13a	P40429	RL13A_HUMAN	20768.8	8131.99	6933.25
libDIA	P40925	P40925	MDH1	Malate dehydrogenase, cytoplasmic	P40925	MDHC_HUMAN	13536.2	7216.86	12565.7
libDIA	P40926	P40926	MDH2	Malate dehydrogenase, mitochondrial	P40926	MDHM_HUMAN	29515.8	25950	13777.7
libDIA	P41250	P41250	GARS	Glycine--tRNA ligase	P41250	SYG_HUMAN	Filtered	1367.14	2365.34
libDIA	P41252	P41252	IARS	Isoleucine--tRNA ligase, cytoplasmic	P41252	SYIC_HUMAN	Filtered	Filtered	2428.38
libDIA	P42167	P42167	TMPO	Lamina-associated polypeptide 2, isoforms beta/gamma	P42167	LAP2B_HUMAN	Filtered	3937.11	963.221
libDIA	P42677	P42677	RPS27	40S ribosomal protein S27	P42677	RS27_HUMAN	Filtered	2744.19	1432.77
libDIA	P42704	P42704	LRPPRC	Leucine-rich PPR motif-containing protein, mitochondrial	P42704	LPPRC_HUMAN	4753.54	2318.3	2441.53
libDIA	P42765	P42765	ACAA2	3-ketoacyl-CoA thiolase, mitochondrial	P42765	THIM_HUMAN	Filtered	Filtered	2125.06
libDIA	P42766	P42766	RPL35	60S ribosomal protein L35	P42766	RL35_HUMAN	74295.9	12100.9	12283
libDIA	P43243	P43243	MATR3	Matrin-3	P43243	MATR3_HUMAN	Filtered	Filtered	1270.11
libDIA	P43307	P43307	SSR1	Translocon-associated protein subunit alpha	P43307	SSRA_HUMAN	2243.52	3111.98	2832.5
libDIA	P43487	P43487	RANBP1	Ran-specific GTPase-activating protein	P43487	RANG_HUMAN	Filtered	Filtered	1606.47
libDIA	P45880	P45880	VDAC2	Voltage-dependent anion-selective channel protein 2	P45880	VDAC2_HUMAN	5777.15	3239.88	2512.02
libDIA	P46776	P46776	RPL27A	60S ribosomal protein L27a	P46776	RL27A_HUMAN	159337	58000	40926.3
libDIA	P46777	P46777	RPL5	60S ribosomal protein L5	P46777	RL5_HUMAN	Filtered	8455.96	3138.51
libDIA	P46778	P46778	RPL21	60S ribosomal protein L21	P46778	RL21_HUMAN	Filtered	2250.89	2045.57
libDIA	P46779	P46779	RPL28	60S ribosomal protein L28	P46779	RL28_HUMAN	Filtered	1834.36	2076.28
libDIA	P46781	P46781	RPS9	40S ribosomal protein S9	P46781	RS9_HUMAN	72645.7	28058.9	17089.7
libDIA	P46782	P46782	RPS5	40S ribosomal protein S5	P46782	RS5_HUMAN	59998.8	9300.08	14620.2
libDIA	P46783	P46783	RPS10	40S ribosomal protein S10	P46783	RS10_HUMAN	21544.9	18023.5	6703.56
libDIA	P47756	P47756	CAPZB	F-actin-capping protein subunit beta	P47756	CAPZB_HUMAN	Filtered	6048.28	4153.8
libDIA	P47897	P47897	QARS	Glutamine--tRNA ligase	P47897	SYQ_HUMAN	Filtered	649.387	1129.95
libDIA	P47914	P47914	RPL29	60S ribosomal protein L29	P47914	RL29_HUMAN	7282.11	Filtered	9319.52
libDIA	P47929	P47929	LGALS7	Galectin-7	P47929	LEG7_HUMAN	Filtered	15923.3	Filtered
libDIA	P48556	P48556	PSMD8	26S proteasome non-ATPase regulatory subunit 8	P48556	PSMD8_HUMAN	Filtered	Filtered	1418.35
libDIA	P48643	P48643	CCT5	T-complex protein 1 subunit epsilon	P48643	TCPE_HUMAN	Filtered	Filtered	1775.7
libDIA	P49207	P49207	RPL34	60S ribosomal protein L34	P49207	RL34_HUMAN	23267.9	7876.5	6499.45
libDIA	P49321	P49321	NASP	Nuclear autoantigenic sperm protein	P49321	NASP_HUMAN	7147.54	2627.69	4834.45
libDIA	P49327	P49327	FASN	Fatty acid synthase	P49327	FAS_HUMAN	11328	2392.66	3169.07
libDIA	P49368	P49368	CCT3	T-complex protein 1 subunit gamma	P49368	TCPG_HUMAN	239058	1.97148e+06	301872
libDIA	P49411	P49411	TUFM	Elongation factor Tu, mitochondrial	P49411	EFTU_HUMAN	7542.27	6705.73	4365.68
libDIA	P49736	P49736	MCM2	DNA replication licensing factor MCM2	P49736	MCM2_HUMAN	10235.7	4687.76	2116.51
libDIA	P49773	P49773	HINT1	Histidine triad nucleotide-binding protein 1	P49773	HINT1_HUMAN	Filtered	Filtered	9407.75
libDIA	P49792	P49792	RANBP2	E3 SUMO-protein ligase RanBP2	P49792	RBP2_HUMAN	207164	947154	775071
libDIA	P50213	P50213	IDH3A	Isocitrate dehydrogenase [NAD] subunit alpha, mitochondrial	P50213	IDH3A_HUMAN	Filtered	Filtered	1053.23
libDIA	P50395	P50395	GDI2	Rab GDP dissociation inhibitor beta	P50395	GDIB_HUMAN	3656.15	3609.13	4957
libDIA	P50502	P50502	ST13	Hsc70-interacting protein	P50502	F10A1_HUMAN	9368.77	4772.65	2737.94
libDIA	P50914	P50914	RPL14	60S ribosomal protein L14	P50914	RL14_HUMAN	91648.8	28728.7	9275.25
libDIA	P50990	P50990	CCT8	T-complex protein 1 subunit theta	P50990	TCPQ_HUMAN	17029.8	7630.04	7762.37
libDIA	P50991	P50991	CCT4	T-complex protein 1 subunit delta	P50991	TCPD_HUMAN	22468.9	35258.8	8280.7
libDIA	P51148	P51148	RAB5C	Ras-related protein Rab-5C	P51148	RAB5C_HUMAN	Filtered	2308.72	1574.08
libDIA	P51149	P51149	RAB7A	Ras-related protein Rab-7a	P51149	RAB7A_HUMAN	5947.66	4115.24	2012.93
libDIA	P51659	P51659	HSD17B4	Peroxisomal multifunctional enzyme type 2	P51659	DHB4_HUMAN	Filtered	6490.2	1188.97
libDIA	P51991	P51991	HNRNPA3	Heterogeneous nuclear ribonucleoprotein A3	P51991	ROA3_HUMAN	Filtered	2820.28	1301.6
libDIA	P52209	P52209	PGD	6-phosphogluconate dehydrogenase, decarboxylating	P52209	6PGD_HUMAN	4530.04	8878.62	8977.1
libDIA	P52272	P52272	HNRNPM	Heterogeneous nuclear ribonucleoprotein M	P52272	HNRPM_HUMAN	7936.24	4880.76	7096.09
libDIA	P52565	P52565	ARHGDIA	Rho GDP-dissociation inhibitor 1	P52565	GDIR1_HUMAN	Filtered	Filtered	5256.49
libDIA	P52566	P52566	ARHGDIB	Rho GDP-dissociation inhibitor 2	P52566	GDIR2_HUMAN	Filtered	Filtered	1488.91
libDIA	P52907	P52907	CAPZA1	F-actin-capping protein subunit alpha-1	P52907	CAZA1_HUMAN	11144.3	4960.55	4410.95
libDIA	P53396	P53396	ACLY	ATP-citrate synthase	P53396	ACLY_HUMAN	Filtered	Filtered	2229.91
libDIA	P53634	P53634	CTSC	Dipeptidyl peptidase 1	P53634	CATC_HUMAN	Filtered	Filtered	1993.23
libDIA	P53999	P53999	SUB1	Activated RNA polymerase II transcriptional coactivator p15	P53999	TCP4_HUMAN	7822.74	3217.1	4063.8
libDIA	P54136	P54136	RARS	Arginine--tRNA ligase, cytoplasmic	P54136	SYRC_HUMAN	6336.68	2558.58	1599.06
libDIA	P54577	P54577	YARS	Tyrosine--tRNA ligase, cytoplasmic	P54577	SYYC_HUMAN	Filtered	1001.34	2118.15
libDIA	P54578	P54578	USP14	Ubiquitin carboxyl-terminal hydrolase 14	P54578	UBP14_HUMAN	Filtered	Filtered	2160.5
libDIA	P54727	P54727	RAD23B	UV excision repair protein RAD23 homolog B	P54727	RD23B_HUMAN	Filtered	1715.35	2562.76
libDIA	P54819	P54819	AK2	Adenylate kinase 2, mitochondrial	P54819	KAD2_HUMAN	Filtered	3396.28	4359.25
libDIA	P55010	P55010	EIF5	Eukaryotic translation initiation factor 5	P55010	IF5_HUMAN	3205.65	1037.78	1459.9
libDIA	P55072	P55072	VCP	Transitional endoplasmic reticulum ATPase	P55072	TERA_HUMAN	Filtered	2928.1	3908.71
libDIA	P55209	P55209	NAP1L1	Nucleosome assembly protein 1-like 1	P55209	NP1L1_HUMAN	12442.8	4674.5	4519.18
libDIA	P55263	P55263	ADK	Adenosine kinase	P55263	ADK_HUMAN	2584.35	2576.79	3902.47
libDIA	P55769	P55769	SNU13	NHP2-like protein 1	P55769	NH2L1_HUMAN	Filtered	1700.76	1335.58
libDIA	P55854;P61956;Q6EEV6	P55854;P61956;Q6EEV6	SUMO3;SUMO2;SUMO4	Small ubiquitin-related modifier 3;Small ubiquitin-related modifier 2;Small ubiquitin-related modifier 4	P55854;P61956;Q6EEV6	SUMO3_HUMAN;SUMO2_HUMAN;SUMO4_HUMAN	10881.5	2575	10697
libDIA	P55884	P55884	EIF3B	Eukaryotic translation initiation factor 3 subunit B	P55884	EIF3B_HUMAN	Filtered	6678.93	2663.22
libDIA	P55957	P55957	BID	BH3-interacting domain death agonist	P55957	BID_HUMAN	Filtered	Filtered	3793.11
libDIA	P56182	P56182	RRP1	Ribosomal RNA processing protein 1 homolog A	P56182	RRP1_HUMAN	204947	23063.9	12999.1
libDIA	P56537	P56537	EIF6	Eukaryotic translation initiation factor 6	P56537	IF6_HUMAN	Filtered	6992.76	9418.92
libDIA	P59998	P59998	ARPC4	Actin-related protein 2/3 complex subunit 4	P59998	ARPC4_HUMAN	10972.9	7153.54	6585.1
libDIA	P60174	P60174	TPI1	Triosephosphate isomerase	P60174	TPIS_HUMAN	Filtered	4396.67	8761.03
libDIA	P60660	P60660	MYL6	Myosin light polypeptide 6	P60660	MYL6_HUMAN	20485.7	2600.19	10653.9
libDIA	P60709;P63261	P60709;P63261	ACTB;ACTG1	Actin, cytoplasmic 1;Actin, cytoplasmic 2	P60709;P63261	ACTB_HUMAN;ACTG_HUMAN	748725	262901	451698
libDIA	P60842	P60842	EIF4A1	Eukaryotic initiation factor 4A-I	P60842	IF4A1_HUMAN	31503	15767.9	19379.2
libDIA	P60866	P60866	RPS20	40S ribosomal protein S20	P60866	RS20_HUMAN	Filtered	7842.2	7380.36
libDIA	P60900	P60900	PSMA6	Proteasome subunit alpha type-6	P60900	PSA6_HUMAN	12081.1	7887.26	5608.89
libDIA	P61086	P61086	UBE2K	Ubiquitin-conjugating enzyme E2 K	P61086	UBE2K_HUMAN	Filtered	2375.19	1954.42
libDIA	P61088;Q5JXB2	P61088;Q5JXB2	UBE2N;UBE2NL	Ubiquitin-conjugating enzyme E2 N;Putative ubiquitin-conjugating enzyme E2 N-like	P61088;Q5JXB2	UBE2N_HUMAN;UE2NL_HUMAN	25133.4	10738	9873.16
libDIA	P61158	P61158	ACTR3	Actin-related protein 3	P61158	ARP3_HUMAN	Filtered	2626.26	1769.91
libDIA	P61204;P84077	P61204;P84077	ARF3;ARF1	ADP-ribosylation factor 3;ADP-ribosylation factor 1	P61204;P84077	ARF3_HUMAN;ARF1_HUMAN	23277.5	13890.7	8690.8
libDIA	P61221	P61221	ABCE1	ATP-binding cassette sub-family E member 1	P61221	ABCE1_HUMAN	Filtered	Filtered	1791.32
libDIA	P61224;P62834	P61224;P62834	RAP1B;RAP1A	Ras-related protein Rap-1b;Ras-related protein Rap-1A	P61224;P62834	RAP1B_HUMAN;RAP1A_HUMAN	14575.6	9911.47	5123.13
libDIA	P61247	P61247	RPS3A	40S ribosomal protein S3a	P61247	RS3A_HUMAN	16584.4	5361.27	6237.21
libDIA	P61254;Q9UNX3	P61254;Q9UNX3	RPL26;RPL26L1	60S ribosomal protein L26;60S ribosomal protein L26-like 1	P61254;Q9UNX3	RL26_HUMAN;RL26L_HUMAN	45964.4	17485	14199.1
libDIA	P61313	P61313	RPL15	60S ribosomal protein L15	P61313	RL15_HUMAN	9309.71	3705.76	8440.08
libDIA	P61353	P61353	RPL27	60S ribosomal protein L27	P61353	RL27_HUMAN	40506.3	7979.4	6768.61
libDIA	P61604	P61604	HSPE1	10 kDa heat shock protein, mitochondrial	P61604	CH10_HUMAN	29245.6	23747.3	21581.3
libDIA	P61619;Q9H9S3	P61619;Q9H9S3	SEC61A1;SEC61A2	Protein transport protein Sec61 subunit alpha isoform 1;Protein transport protein Sec61 subunit alpha isoform 2	P61619;Q9H9S3	S61A1_HUMAN;S61A2_HUMAN	Filtered	Filtered	561.009
libDIA	P61626	P61626	LYZ	Lysozyme C	P61626	LYSC_HUMAN	4354.22	27310.9	6416.81
libDIA	P61978	P61978	HNRNPK	Heterogeneous nuclear ribonucleoprotein K	P61978	HNRPK_HUMAN	12988.7	8752.1	5054.52
libDIA	P61981	P61981	YWHAG	14-3-3 protein gamma	P61981	1433G_HUMAN	Filtered	Filtered	13722.5
libDIA	P62081	P62081	RPS7	40S ribosomal protein S7	P62081	RS7_HUMAN	28820.6	11731.4	8403.47
libDIA	P62158	P62158	CALM1	Calmodulin	P62158	CALM_HUMAN	Filtered	5221.85	5791.97
libDIA	P62241	P62241	RPS8	40S ribosomal protein S8	P62241	RS8_HUMAN	23001.1	11257.7	8634.13
libDIA	P62244	P62244	RPS15A	40S ribosomal protein S15a	P62244	RS15A_HUMAN	12850.2	18294.1	12004.2
libDIA	P62249	P62249	RPS16	40S ribosomal protein S16	P62249	RS16_HUMAN	50959	24286.4	16112.9
libDIA	P62258	P62258	YWHAE	14-3-3 protein epsilon	P62258	1433E_HUMAN	3471.32	1695.86	3491.27
libDIA	P62263	P62263	RPS14	40S ribosomal protein S14	P62263	RS14_HUMAN	91822.8	8838.47	12921.9
libDIA	P62266	P62266	RPS23	40S ribosomal protein S23	P62266	RS23_HUMAN	24542.9	28620	5730.42
libDIA	P62269	P62269	RPS18	40S ribosomal protein S18	P62269	RS18_HUMAN	25226.9	9643.97	11746.8
libDIA	P62277	P62277	RPS13	40S ribosomal protein S13	P62277	RS13_HUMAN	47401.2	21145.5	19419
libDIA	P62280	P62280	RPS11	40S ribosomal protein S11	P62280	RS11_HUMAN	6843.74	5383.54	6540.59
libDIA	P62304	P62304	SNRPE	Small nuclear ribonucleoprotein E	P62304	RUXE_HUMAN	12322.1	16006	7846.9
libDIA	P62310	P62310	LSM3	U6 snRNA-associated Sm-like protein LSm3	P62310	LSM3_HUMAN	3205.15	2527.11	3670.73
libDIA	P62314	P62314	SNRPD1	Small nuclear ribonucleoprotein Sm D1	P62314	SMD1_HUMAN	6904.03	8140.01	1906.97
libDIA	P62316	P62316	SNRPD2	Small nuclear ribonucleoprotein Sm D2	P62316	SMD2_HUMAN	25508.1	12595.4	6952.47
libDIA	P62318	P62318	SNRPD3	Small nuclear ribonucleoprotein Sm D3	P62318	SMD3_HUMAN	11345.3	7409.21	3348.23
libDIA	P62328	P62328	TMSB4X	Thymosin beta-4	P62328	TYB4_HUMAN	Filtered	Filtered	1878.7
libDIA	P62424	P62424	RPL7A	60S ribosomal protein L7a	P62424	RL7A_HUMAN	20690.1	8584.47	6040.52
libDIA	P62491;Q15907	P62491;Q15907	RAB11A;RAB11B	Ras-related protein Rab-11A;Ras-related protein Rab-11B	P62491;Q15907	RB11A_HUMAN;RB11B_HUMAN	5687.89	3747.7	3109.09
libDIA	P62495	P62495	ETF1	Eukaryotic peptide chain release factor subunit 1	P62495	ERF1_HUMAN	Filtered	3683.48	1757.56
libDIA	P62701	P62701	RPS4X	40S ribosomal protein S4, X isoform	P62701	RS4X_HUMAN	23968.1	10532.3	7960.19
libDIA	P62736;P63267;P68032;P68133	P62736;P63267;P68032;P68133	ACTA2;ACTG2;ACTC1;ACTA1	Actin, aortic smooth muscle;Actin, gamma-enteric smooth muscle;Actin, alpha cardiac muscle 1;Actin, alpha skeletal muscle	P62736;P63267;P68032;P68133	ACTA_HUMAN;ACTH_HUMAN;ACTC_HUMAN;ACTS_HUMAN	Filtered	9848.64	9786.5
libDIA	P62750	P62750	RPL23A	60S ribosomal protein L23a	P62750	RL23A_HUMAN	26940.6	4420.56	5103.04
libDIA	P62753	P62753	RPS6	40S ribosomal protein S6	P62753	RS6_HUMAN	60900.2	25807.6	18290.9
libDIA	P62805	P62805	HIST1H4A	Histone H4	P62805	H4_HUMAN	1.02618e+06	430206	231829
libDIA	P62820;Q9H0U4	P62820;Q9H0U4	RAB1A;RAB1B	Ras-related protein Rab-1A;Ras-related protein Rab-1B	P62820;Q9H0U4	RAB1A_HUMAN;RAB1B_HUMAN	Filtered	2697.08	5049.57
libDIA	P62826	P62826	RAN	GTP-binding nuclear protein Ran	P62826	RAN_HUMAN	80035.3	21739.5	25953
libDIA	P62829	P62829	RPL23	60S ribosomal protein L23	P62829	RL23_HUMAN	18829.8	6854.47	4669.84
libDIA	P62847	P62847	RPS24	40S ribosomal protein S24	P62847	RS24_HUMAN	9456.41	17686.4	9927.5
libDIA	P62851	P62851	RPS25	40S ribosomal protein S25	P62851	RS25_HUMAN	60027.7	12123.2	8774.41
libDIA	P62854;Q5JNZ5	P62854;Q5JNZ5	RPS26;RPS26P11	40S ribosomal protein S26;Putative 40S ribosomal protein S26-like 1	P62854;Q5JNZ5	RS26_HUMAN;RS26L_HUMAN	111751	27039.3	40939.2
libDIA	P62857	P62857	RPS28	40S ribosomal protein S28	P62857	RS28_HUMAN	44713.9	40809.8	14442.2
libDIA	P62861	P62861	FAU	40S ribosomal protein S30	P62861	RS30_HUMAN	34072.6	10550.1	6482.73
libDIA	P62899	P62899	RPL31	60S ribosomal protein L31	P62899	RL31_HUMAN	18320.3	14651.7	31912
libDIA	P62906	P62906	RPL10A	60S ribosomal protein L10a	P62906	RL10A_HUMAN	66818.8	2717.2	10191.6
libDIA	P62913	P62913	RPL11	60S ribosomal protein L11	P62913	RL11_HUMAN	26527.4	13377	6401.49
libDIA	P62917	P62917	RPL8	60S ribosomal protein L8	P62917	RL8_HUMAN	10364.4	7599.82	12504.8
libDIA	P62937	P62937	PPIA	Peptidyl-prolyl cis-trans isomerase A	P62937	PPIA_HUMAN	139199	70732	91092.3
libDIA	P62942	P62942	FKBP1A	Peptidyl-prolyl cis-trans isomerase FKBP1A	P62942	FKB1A_HUMAN	Filtered	2411.1	9008.72
libDIA	P63104	P63104	YWHAZ	14-3-3 protein zeta/delta	P63104	1433Z_HUMAN	9777.38	6497.75	8384.48
libDIA	P63165	P63165	SUMO1	Small ubiquitin-related modifier 1	P63165	SUMO1_HUMAN	Filtered	Filtered	2041.91
libDIA	P63208	P63208	SKP1	S-phase kinase-associated protein 1	P63208	SKP1_HUMAN	Filtered	Filtered	3954.36
libDIA	P63220	P63220	RPS21	40S ribosomal protein S21	P63220	RS21_HUMAN	Filtered	936.684	4674.32
libDIA	P63241	P63241	EIF5A	Eukaryotic translation initiation factor 5A-1	P63241	IF5A1_HUMAN	Filtered	4990.25	3642.36
libDIA	P63244	P63244	GNB2L1	Guanine nucleotide-binding protein subunit beta-2-like 1	P63244	GBLP_HUMAN	20302.6	10650.2	16794.2
libDIA	P67809	P67809	YBX1	Nuclease-sensitive element-binding protein 1	P67809	YBOX1_HUMAN	17898	2844.97	2556.63
libDIA	P67936	P67936	TPM4	Tropomyosin alpha-4 chain	P67936	TPM4_HUMAN	21124	9691	11946.7
libDIA	P68104	P68104	EEF1A1	Elongation factor 1-alpha 1	P68104	EF1A1_HUMAN	748656	217502	189644
libDIA	P68363;Q71U36;Q9BQE3	P68363;Q71U36;Q9BQE3	TUBA1B;TUBA1A;TUBA1C	Tubulin alpha-1B chain;Tubulin alpha-1A chain;Tubulin alpha-1C chain	P68363;Q71U36;Q9BQE3	TBA1B_HUMAN;TBA1A_HUMAN;TBA1C_HUMAN	68728.3	67512.1	40671.1
libDIA	P68366	P68366	TUBA4A	Tubulin alpha-4A chain	P68366	TBA4A_HUMAN	15193.2	5272.44	4312.59
libDIA	P68371	P68371	TUBB4B	Tubulin beta-4B chain	P68371	TBB4B_HUMAN	178861	96827.6	63919.7
libDIA	P68431;P84243;Q16695;Q71DI3	P68431;P84243;Q16695;Q71DI3	HIST1H3A;H3F3A;HIST3H3;HIST2H3A	Histone H3.1;Histone H3.3;Histone H3.1t;Histone H3.2	P68431;P84243;Q16695;Q71DI3	H31_HUMAN;H33_HUMAN;H31T_HUMAN;H32_HUMAN	511823	185277	96520.8
libDIA	P78371	P78371	CCT2	T-complex protein 1 subunit beta	P78371	TCPB_HUMAN	16123.2	Filtered	4211.72
libDIA	P78395	P78395	PRAME	Melanoma antigen preferentially expressed in tumors	P78395	PRAME_HUMAN	78457.8	213082	63888.5
libDIA	P78417	P78417	GSTO1	Glutathione S-transferase omega-1	P78417	GSTO1_HUMAN	Filtered	8465.53	4011.54
libDIA	P78527	P78527	PRKDC	DNA-dependent protein kinase catalytic subunit	P78527	PRKDC_HUMAN	3032.28	1617.89	985.287
libDIA	P81605	P81605	DCD	Dermcidin	P81605	DCD_HUMAN	75642.1	56019.9	65370.8
libDIA	P82979	P82979	SARNP	SAP domain-containing ribonucleoprotein	P82979	SARNP_HUMAN	Filtered	890.627	1364.98
libDIA	P83731	P83731	RPL24	60S ribosomal protein L24	P83731	RL24_HUMAN	16711.8	6984.4	2505.53
libDIA	P84098	P84098	RPL19	60S ribosomal protein L19	P84098	RL19_HUMAN	Filtered	1248.27	3160.03
libDIA	P84103	P84103	SRSF3	Serine/arginine-rich splicing factor 3	P84103	SRSF3_HUMAN	23306.6	19094	5725.55
libDIA	Q00325	Q00325	SLC25A3	Phosphate carrier protein, mitochondrial	Q00325	MPCP_HUMAN	Filtered	3305.44	1817.34
libDIA	Q00610	Q00610	CLTC	Clathrin heavy chain 1	Q00610	CLH1_HUMAN	2812.73	2302.13	3286.35
libDIA	Q00839	Q00839	HNRNPU	Heterogeneous nuclear ribonucleoprotein U	Q00839	HNRPU_HUMAN	5346105	8800.77	4742.93
libDIA	Q01105	Q01105	SET	Protein SET	Q01105	SET_HUMAN	14135	4844.23	9167.4
libDIA	Q01130;Q9BRL6	Q01130;Q9BRL6	SRSF2;SRSF8	Serine/arginine-rich splicing factor 2;Serine/arginine-rich splicing factor 8	Q01130;Q9BRL6	SRSF2_HUMAN;SRSF8_HUMAN	6370.52	9148.35	8611.86
libDIA	Q01469	Q01469	FABP5	Fatty acid-binding protein, epidermal	Q01469	FABP5_HUMAN	49635.4	29444.7	15467.8
libDIA	Q01518	Q01518	CAP1	Adenylyl cyclase-associated protein 1	Q01518	CAP1_HUMAN	4148.48	5860.27	2162.98
libDIA	Q01844	Q01844	EWSR1	RNA-binding protein EWS	Q01844	EWS_HUMAN	Filtered	2309.55	3993.59
libDIA	Q02413	Q02413	DSG1	Desmoglein-1	Q02413	DSG1_HUMAN	Filtered	11070	5820.52
libDIA	Q02790	Q02790	FKBP4	Peptidyl-prolyl cis-trans isomerase FKBP4	Q02790	FKBP4_HUMAN	3994.39	Filtered	1503.28
libDIA	Q02878	Q02878	RPL6	60S ribosomal protein L6	Q02878	RL6_HUMAN	47382	9637.29	14616.7
libDIA	Q03181	Q03181	PPARD	Peroxisome proliferator-activated receptor delta	Q03181	PPARD_HUMAN	16564.2	125820	77312.7
libDIA	Q04637	Q04637	EIF4G1	Eukaryotic translation initiation factor 4 gamma 1	Q04637	IF4G1_HUMAN	Filtered	Filtered	3029.47
libDIA	Q04695	Q04695	KRT17	Keratin, type I cytoskeletal 17	Q04695	K1C17_HUMAN	Filtered	1061.21	1201.87
libDIA	Q04760	Q04760	GLO1	Lactoylglutathione lyase	Q04760	LGUL_HUMAN	5520.29	3239.36	3170.7
libDIA	Q04917	Q04917	YWHAH	14-3-3 protein eta	Q04917	1433F_HUMAN	52635.8	14535.9	20625.2
libDIA	Q06323	Q06323	PSME1	Proteasome activator complex subunit 1	Q06323	PSME1_HUMAN	12709.7	2760.66	6579.47
libDIA	Q06830	Q06830	PRDX1	Peroxiredoxin-1	Q06830	PRDX1_HUMAN	59362.5	27940.9	39755.9
libDIA	Q07020	Q07020	RPL18	60S ribosomal protein L18	Q07020	RL18_HUMAN	44320.4	30342.2	12613.4
libDIA	Q07666	Q07666	KHDRBS1	KH domain-containing, RNA-binding, signal transduction-associated protein 1	Q07666	KHDR1_HUMAN	Filtered	3603.17	1908.25
libDIA	Q07955	Q07955	SRSF1	Serine/arginine-rich splicing factor 1	Q07955	SRSF1_HUMAN	7696.58	3251.48	2682.66
libDIA	Q08188	Q08188	TGM3	Protein-glutamine gamma-glutamyltransferase E	Q08188	TGM3_HUMAN	13585.1	28181.9	11680.5
libDIA	Q08211	Q08211	DHX9	ATP-dependent RNA helicase A	Q08211	DHX9_HUMAN	5519.82	5341.34	4216.26
libDIA	Q08554	Q08554	DSC1	Desmocollin-1	Q08554	DSC1_HUMAN	16076.7	4595.97	3515.99
libDIA	Q09028	Q09028	RBBP4	Histone-binding protein RBBP4	Q09028	RBBP4_HUMAN	Filtered	Filtered	1089.53
libDIA	Q12905	Q12905	ILF2	Interleukin enhancer-binding factor 2	Q12905	ILF2_HUMAN	7885.5	3196.47	1160.77
libDIA	Q12906	Q12906	ILF3	Interleukin enhancer-binding factor 3	Q12906	ILF3_HUMAN	Filtered	1677.17	1100.99
libDIA	Q12907	Q12907	LMAN2	Vesicular integral-membrane protein VIP36	Q12907	LMAN2_HUMAN	1662.79	993.107	1833.11
libDIA	Q12931	Q12931	TRAP1	Heat shock protein 75 kDa, mitochondrial	Q12931	TRAP1_HUMAN	Filtered	3538	1499.58
libDIA	Q13185	Q13185	CBX3	Chromobox protein homolog 3	Q13185	CBX3_HUMAN	Filtered	Filtered	2119.27
libDIA	Q13247	Q13247	SRSF6	Serine/arginine-rich splicing factor 6	Q13247	SRSF6_HUMAN	1.46134e+06	9236.53	7406.75
libDIA	Q13347	Q13347	EIF3I	Eukaryotic translation initiation factor 3 subunit I	Q13347	EIF3I_HUMAN	Filtered	2091.29	2408.83
libDIA	Q13404;Q15819	Q13404;Q15819	UBE2V1;UBE2V2	Ubiquitin-conjugating enzyme E2 variant 1;Ubiquitin-conjugating enzyme E2 variant 2	Q13404;Q15819	UB2V1_HUMAN;UB2V2_HUMAN	Filtered	Filtered	4133.41
libDIA	Q13435	Q13435	SF3B2	Splicing factor 3B subunit 2	Q13435	SF3B2_HUMAN	Filtered	1793.93	2270.68
libDIA	Q13442	Q13442	PDAP1	28 kDa heat- and acid-stable phosphoprotein	Q13442	HAP28_HUMAN	4826.17	2410.4	2045.6
libDIA	Q13867	Q13867	BLMH	Bleomycin hydrolase	Q13867	BLMH_HUMAN	11930.2	32324.3	7026.03
libDIA	Q14011	Q14011	CIRBP	Cold-inducible RNA-binding protein	Q14011	CIRBP_HUMAN	Filtered	Filtered	492.701
libDIA	Q14019	Q14019	COTL1	Coactosin-like protein	Q14019	COTL1_HUMAN	Filtered	Filtered	3111.07
libDIA	Q14103	Q14103	HNRNPD	Heterogeneous nuclear ribonucleoprotein D0	Q14103	HNRPD_HUMAN	46156.5	24195.3	15932.8
libDIA	Q14152	Q14152	EIF3A	Eukaryotic translation initiation factor 3 subunit A	Q14152	EIF3A_HUMAN	148784	169145	24881.3
libDIA	Q14566	Q14566	MCM6	DNA replication licensing factor MCM6	Q14566	MCM6_HUMAN	Filtered	446.657	2190.17
libDIA	Q14696	Q14696	MESDC2	LDLR chaperone MESD	Q14696	MESD_HUMAN	120711	855751	91914.7
libDIA	Q14697	Q14697	GANAB	Neutral alpha-glucosidase AB	Q14697	GANAB_HUMAN	4009.34	2590.22	1721.26
libDIA	Q14CN4;Q3SY84;Q7RTS7;Q86Y46	Q14CN4;Q3SY84;Q7RTS7;Q86Y46	KRT72;KRT71;KRT74;KRT73	Keratin, type II cytoskeletal 72;Keratin, type II cytoskeletal 71;Keratin, type II cytoskeletal 74;Keratin, type II cytoskeletal 73	Q14CN4;Q3SY84;Q7RTS7;Q86Y46	K2C72_HUMAN;K2C71_HUMAN;K2C74_HUMAN;K2C73_HUMAN	4728.88	17844	13461.1
libDIA	Q15056	Q15056	EIF4H	Eukaryotic translation initiation factor 4H	Q15056	IF4H_HUMAN	19099.6	6525.53	3500.85
libDIA	Q15084	Q15084	PDIA6	Protein disulfide-isomerase A6	Q15084	PDIA6_HUMAN	5035.93	5862.06	2714.8
libDIA	Q15181	Q15181	PPA1	Inorganic pyrophosphatase	Q15181	IPYR_HUMAN	17266.7	11697.9	4626.3
libDIA	Q15185	Q15185	PTGES3	Prostaglandin E synthase 3	Q15185	TEBP_HUMAN	Filtered	Filtered	3531.1
libDIA	Q15233	Q15233	NONO	Non-POU domain-containing octamer-binding protein	Q15233	NONO_HUMAN	Filtered	4496.2	6457.66
libDIA	Q15365	Q15365	PCBP1	Poly(rC)-binding protein 1	Q15365	PCBP1_HUMAN	3452.89	3271.24	3774.67
libDIA	Q15691	Q15691	MAPRE1	Microtubule-associated protein RP/EB family member 1	Q15691	MARE1_HUMAN	Filtered	Filtered	1272.85
libDIA	Q15717	Q15717	ELAVL1	ELAV-like protein 1	Q15717	ELAV1_HUMAN	Filtered	3350.1	2662.92
libDIA	Q15843	Q15843	NEDD8	NEDD8	Q15843	NEDD8_HUMAN	Filtered	3550.2	2444.69
libDIA	Q15904	Q15904	ATP6AP1	V-type proton ATPase subunit S1	Q15904	VAS1_HUMAN	730329	251478	112975
libDIA	Q16181	Q16181	2020-09-07	Septin-7	Q16181	SEPT7_HUMAN	Filtered	Filtered	1936.74
libDIA	Q16563	Q16563	SYPL1	Synaptophysin-like protein 1	Q16563	SYPL1_HUMAN	Filtered	5722.56	2233.28
libDIA	Q16629	Q16629	SRSF7	Serine/arginine-rich splicing factor 7	Q16629	SRSF7_HUMAN	6586.01	5273.6	3730.51
libDIA	Q16650	Q16650	TBR1	T-box brain protein 1	Q16650	TBR1_HUMAN	Filtered	2133.79	2342.02
libDIA	Q17R89;Q68EM7	Q17R89;Q68EM7	ARHGAP44;ARHGAP17	Rho GTPase-activating protein 44;Rho GTPase-activating protein 17	Q17R89;Q68EM7	RHG44_HUMAN;RHG17_HUMAN	34744.6	Filtered	Filtered
libDIA	Q2TAY7	Q2TAY7	SMU1	WD40 repeat-containing protein SMU1	Q2TAY7	SMU1_HUMAN	8756.08	Filtered	Filtered
libDIA	Q30154	Q30154	HLA-DRB5	HLA class II histocompatibility antigen, DR beta 5 chain	Q30154	DRB5_HUMAN	Filtered	Filtered	3210.68
libDIA	Q53HL2	Q53HL2	CDCA8	Borealin	Q53HL2	BOREA_HUMAN	Filtered	11582.8	4071.53
libDIA	Q5D862	Q5D862	FLG2	Filaggrin-2	Q5D862	FILA2_HUMAN	26752.9	85244.1	44395
libDIA	Q5T750	Q5T750	XP32	Skin-specific protein 32	Q5T750	XP32_HUMAN	110188	133317	78281
libDIA	Q6BDS2	Q6BDS2	UHRF1BP1	UHRF1-binding protein 1	Q6BDS2	URFB1_HUMAN	14962.3	14300.5	13406
libDIA	Q7KZF4	Q7KZF4	SND1	Staphylococcal nuclease domain-containing protein 1	Q7KZF4	SND1_HUMAN	103668	Filtered	3419.39
libDIA	Q7L1Q6	Q7L1Q6	BZW1	Basic leucine zipper and W2 domain-containing protein 1	Q7L1Q6	BZW1_HUMAN	Filtered	Filtered	2491.42
libDIA	Q7Z5H4	Q7Z5H4	VN1R5	Vomeronasal type-1 receptor 5	Q7Z5H4	VN1R5_HUMAN	Filtered	2393.13	2238.99
libDIA	Q7Z794	Q7Z794	KRT77	Keratin, type II cytoskeletal 1b	Q7Z794	K2C1B_HUMAN	19157.1	15018.1	8173.55
libDIA	Q86U42	Q86U42	PABPN1	Polyadenylate-binding protein 2	Q86U42	PABP2_HUMAN	Filtered	3837.83	1922.69
libDIA	Q86UX7	Q86UX7	FERMT3	Fermitin family homolog 3	Q86UX7	URP2_HUMAN	Filtered	2095.27	2274.83
libDIA	Q86V81	Q86V81	ALYREF	THO complex subunit 4	Q86V81	THOC4_HUMAN	Filtered	4458.6	770.847
libDIA	Q86VP6	Q86VP6	CAND1	Cullin-associated NEDD8-dissociated protein 1	Q86VP6	CAND1_HUMAN	Filtered	779.42	1195.06
libDIA	Q86Y56	Q86Y56	DNAAF5	Dynein assembly factor 5, axonemal	Q86Y56	DAAF5_HUMAN	57102.1	285065	39249.6
libDIA	Q8IUE6	Q8IUE6	HIST2H2AB	Histone H2A type 2-B	Q8IUE6	H2A2B_HUMAN	Filtered	8978.93	2968.61
libDIA	Q8N1N4	Q8N1N4	KRT78	Keratin, type II cytoskeletal 78	Q8N1N4	K2C78_HUMAN	14702.9	24196.6	12217.3
libDIA	Q8N9W4	Q8N9W4	GOLGA6L2	Golgin subfamily A member 6-like protein 2	Q8N9W4	GG6L2_HUMAN	8019.02	8002.49	6463.31
libDIA	Q8NBS9	Q8NBS9	TXNDC5	Thioredoxin domain-containing protein 5	Q8NBS9	TXND5_HUMAN	3643.2	Filtered	2797.8
libDIA	Q8NC51	Q8NC51	SERBP1	Plasminogen activator inhibitor 1 RNA-binding protein	Q8NC51	PAIRB_HUMAN	Filtered	Filtered	356.428
libDIA	Q92598	Q92598	HSPH1	Heat shock protein 105 kDa	Q92598	HS105_HUMAN	Filtered	Filtered	2289.9
libDIA	Q92841	Q92841	DDX17	Probable ATP-dependent RNA helicase DDX17	Q92841	DDX17_HUMAN	70283.2	15546.7	6381.17
libDIA	Q92945	Q92945	KHSRP	Far upstream element-binding protein 2	Q92945	FUBP2_HUMAN	5145.9	2748.36	3591.17
libDIA	Q96AE4	Q96AE4	FUBP1	Far upstream element-binding protein 1	Q96AE4	FUBP1_HUMAN	7489.01	1978.36	1789.6
libDIA	Q96FW1	Q96FW1	OTUB1	Ubiquitin thioesterase OTUB1	Q96FW1	OTUB1_HUMAN	Filtered	Filtered	948.929
libDIA	Q96HU8	Q96HU8	DIRAS2	GTP-binding protein Di-Ras2	Q96HU8	DIRA2_HUMAN	16069.6	10023.6	4521.93
libDIA	Q96JB1	Q96JB1	DNAH8	Dynein heavy chain 8, axonemal	Q96JB1	DYH8_HUMAN	236339	364596	221013
libDIA	Q96M42	Q96M42	LINC00479	Putative uncharacterized protein encoded by LINC00479	Q96M42	CU129_HUMAN	889352	504103	260521
libDIA	Q96P63	Q96P63	SERPINB12	Serpin B12	Q96P63	SPB12_HUMAN	7929.34	19751.9	7008.67
libDIA	Q96RU3	Q96RU3	FNBP1	Formin-binding protein 1	Q96RU3	FNBP1_HUMAN	Filtered	Filtered	1375.59
libDIA	Q99436	Q99436	PSMB7	Proteasome subunit beta type-7	Q99436	PSB7_HUMAN	5339.61	2375.3	6434.5
libDIA	Q99459	Q99459	CDC5L	Cell division cycle 5-like protein	Q99459	CDC5L_HUMAN	111644	Filtered	Filtered
libDIA	Q99497	Q99497	PARK7	Protein deglycase DJ-1	Q99497	PARK7_HUMAN	20710.6	16178.8	8624.33
libDIA	Q99623	Q99623	PHB2	Prohibitin-2	Q99623	PHB2_HUMAN	12584.5	5455.75	4933.29
libDIA	Q99733	Q99733	NAP1L4	Nucleosome assembly protein 1-like 4	Q99733	NP1L4_HUMAN	Filtered	Filtered	3442.68
libDIA	Q99832	Q99832	CCT7	T-complex protein 1 subunit eta	Q99832	TCPH_HUMAN	6892.61	3991.38	2443.59
libDIA	Q99873	Q99873	PRMT1	Protein arginine N-methyltransferase 1	Q99873	ANM1_HUMAN	10577.5	3547.28	2957.73
libDIA	Q9BPU6	Q9BPU6	DPYSL5	Dihydropyrimidinase-related protein 5	Q9BPU6	DPYL5_HUMAN	10232.6	4610.46	4909.63
libDIA	Q9BPX5	Q9BPX5	ARPC5L	Actin-related protein 2/3 complex subunit 5-like protein	Q9BPX5	ARP5L_HUMAN	Filtered	2867.86	2747.27
libDIA	Q9BS26	Q9BS26	ERP44	Endoplasmic reticulum resident protein 44	Q9BS26	ERP44_HUMAN	10784.5	23253.2	6860.72
libDIA	Q9BUL8	Q9BUL8	PDCD10	Programmed cell death protein 10	Q9BUL8	PDC10_HUMAN	Filtered	Filtered	8255.66
libDIA	Q9C0B1	Q9C0B1	FTO	Alpha-ketoglutarate-dependent dioxygenase FTO	Q9C0B1	FTO_HUMAN	724333	2.70569e+06	385666
libDIA	Q9GZX5	Q9GZX5	ZNF350	Zinc finger protein 350	Q9GZX5	ZN350_HUMAN	74127.5	133441	34259.7
libDIA	Q9NR30	Q9NR30	DDX21	Nucleolar RNA helicase 2	Q9NR30	DDX21_HUMAN	17130	8656.33	5247.16
libDIA	Q9NR31;Q9Y6B6	Q9NR31;Q9Y6B6	SAR1A;SAR1B	GTP-binding protein SAR1a;GTP-binding protein SAR1b	Q9NR31;Q9Y6B6	SAR1A_HUMAN;SAR1B_HUMAN	17428.3	9749.23	5287.97
libDIA	Q9NSD9	Q9NSD9	FARSB	Phenylalanine--tRNA ligase beta subunit	Q9NSD9	SYFB_HUMAN	4255.48	4832.41	2690.71
libDIA	Q9P2J5	Q9P2J5	LARS	Leucine--tRNA ligase, cytoplasmic	Q9P2J5	SYLC_HUMAN	Filtered	7701.03	2778.5
libDIA	Q9UBD5	Q9UBD5	ORC3	Origin recognition complex subunit 3	Q9UBD5	ORC3_HUMAN	13335	75567.6	28005.9
libDIA	Q9UBT2	Q9UBT2	UBA2	SUMO-activating enzyme subunit 2	Q9UBT2	SAE2_HUMAN	Filtered	Filtered	343.443
libDIA	Q9UHD8	Q9UHD8	2020-09-09	Septin-9	Q9UHD8	SEPT9_HUMAN	7674.42	1964	2436.3
libDIA	Q9UJU6	Q9UJU6	DBNL	Drebrin-like protein	Q9UJU6	DBNL_HUMAN	Filtered	Filtered	965.773
libDIA	Q9UK76	Q9UK76	HN1	Hematological and neurological expressed 1 protein	Q9UK76	HN1_HUMAN	Filtered	Filtered	1722.24
libDIA	Q9UKK9	Q9UKK9	NUDT5	ADP-sugar pyrophosphatase	Q9UKK9	NUDT5_HUMAN	Filtered	1829.38	957.582
libDIA	Q9UL46	Q9UL46	PSME2	Proteasome activator complex subunit 2	Q9UL46	PSME2_HUMAN	Filtered	Filtered	4803.57
libDIA	Q9ULL4	Q9ULL4	PLXNB3	Plexin-B3	Q9ULL4	PLXB3_HUMAN	88014.4	118565	83346.3
libDIA	Q9UQ80	Q9UQ80	PA2G4	Proliferation-associated protein 2G4	Q9UQ80	PA2G4_HUMAN	15359.6	6337.28	9292.57
libDIA	Q9Y230	Q9Y230	RUVBL2	RuvB-like 2	Q9Y230	RUVB2_HUMAN	4470.7	Filtered	5783.12
libDIA	Q9Y265	Q9Y265	RUVBL1	RuvB-like 1	Q9Y265	RUVB1_HUMAN	3324	1390.62	2040.7
libDIA	Q9Y266	Q9Y266	NUDC	Nuclear migration protein nudC	Q9Y266	NUDC_HUMAN	Filtered	Filtered	1970.57
libDIA	Q9Y2S6	Q9Y2S6	TMA7	Translation machinery-associated protein 7	Q9Y2S6	TMA7_HUMAN	Filtered	Filtered	2203.5
libDIA	Q9Y2W1	Q9Y2W1	THRAP3	Thyroid hormone receptor-associated protein 3	Q9Y2W1	TR150_HUMAN	Filtered	2822.27	1607.73
libDIA	Q9Y3U8	Q9Y3U8	RPL36	60S ribosomal protein L36	Q9Y3U8	RL36_HUMAN	4293.81	Filtered	2033.09
libDIA	Q9Y617	Q9Y617	PSAT1	Phosphoserine aminotransferase	Q9Y617	SERC_HUMAN	Filtered	Filtered	1317.57

## Sheet: MEC1_14 cells
libDIA-Protein Groups IDs												dirDIA-Protein Groups IDs
Source	PG.ProteinGroups	PG.ProteinAccessions	PG.Genes	PG.ProteinDescriptions	PG.UniProtIds	PG.ProteinNames	[1] 20201106_MEC1-MF-10cells-Eclipse-DIA-01.raw.PG.Quantity	[2] 20201106_MEC1-MF-10cells-Eclipse-DIA-02.raw.PG.Quantity	[3] 20201106_MEC1-MF-10cells-Eclipse-DIA-03.raw.PG.Quantity			Source	PG.ProteinGroups	PG.ProteinAccessions	PG.Genes	PG.ProteinDescriptions	PG.UniProtIds	PG.ProteinNames	[1] 20201106_MEC1-MF-10cells-Eclipse-DIA-01.raw.PG.Quantity	[2] 20201106_MEC1-MF-10cells-Eclipse-DIA-02.raw.PG.Quantity	[3] 20201106_MEC1-MF-10cells-Eclipse-DIA-03.raw.PG.Quantity
libDIA	A5A3E0	A5A3E0	POTEF	POTE ankyrin domain family member F	A5A3E0	POTEF_HUMAN	223929	227857	368657			dirDIA	A1L4H1	A1L4H1	SSC5D	Soluble scavenger receptor cysteine-rich domain-containing protein SSC5D	A1L4H1	SRCRL_HUMAN	21503.4	23269.4	14552.2
libDIA	A6NCS4	A6NCS4	NKX2-6	Homeobox protein Nkx-2.6	A6NCS4	NKX26_HUMAN	1.37203e+06	1497104	1364021			dirDIA	A5A3E0	A5A3E0	POTEF	POTE ankyrin domain family member F	A5A3E0	POTEF_HUMAN	240854	246099	382003
libDIA	A6NI72;P14598	A6NI72;P14598	NCF1B;NCF1	Putative neutrophil cytosol factor 1B;Neutrophil cytosol factor 1	A6NI72;P14598	NCF1B_HUMAN;NCF1_HUMAN	Filtered	Filtered	2938.42			dirDIA	A6NEC2;P55786	A6NEC2;P55786	NPEPPSL1;NPEPPS	Puromycin-sensitive aminopeptidase-like protein;Puromycin-sensitive aminopeptidase	A6NEC2;P55786	PSAL_HUMAN;PSA_HUMAN	4570.48	4553.95	3383.15
libDIA	A8MWD9;P62308	A8MWD9;P62308	SNRPGP15;SNRPG	Putative small nuclear ribonucleoprotein G-like protein 15;Small nuclear ribonucleoprotein G	A8MWD9;P62308	RUXGL_HUMAN;RUXG_HUMAN	Filtered	Filtered	2474.41			dirDIA	A6NI72;P14598	A6NI72;P14598	NCF1B;NCF1	Putative neutrophil cytosol factor 1B;Neutrophil cytosol factor 1	A6NI72;P14598	NCF1B_HUMAN;NCF1_HUMAN	3205.74	975.404	3149.34
libDIA	B0I1T2	B0I1T2	MYO1G	Unconventional myosin-Ig	B0I1T2	MYO1G_HUMAN	Filtered	10140.4	8177.65			dirDIA	B0I1T2	B0I1T2	MYO1G	Unconventional myosin-Ig	B0I1T2	MYO1G_HUMAN	4562.06	4259.17	6121.81
libDIA	B5ME19;Q99613	B5ME19;Q99613	EIF3CL;EIF3C	Eukaryotic translation initiation factor 3 subunit C-like protein;Eukaryotic translation initiation factor 3 subunit C	B5ME19;Q99613	EIFCL_HUMAN;EIF3C_HUMAN	5169.75	Filtered	8478.23			dirDIA	E9PAV3;Q13765	E9PAV3;Q13765	NACA	Nascent polypeptide-associated complex subunit alpha, muscle-specific form;Nascent polypeptide-associated complex subunit alpha	E9PAV3;Q13765	NACAM_HUMAN;NACA_HUMAN	7648.5	9461.71	8549.51
libDIA	E9PAV3;Q13765	E9PAV3;Q13765	NACA	Nascent polypeptide-associated complex subunit alpha, muscle-specific form;Nascent polypeptide-associated complex subunit alpha	E9PAV3;Q13765	NACAM_HUMAN;NACA_HUMAN	24760.9	28393.6	12940.2			dirDIA	E9PRG8	E9PRG8	C11orf98	Uncharacterized protein C11orf98	E9PRG8	CK098_HUMAN	4087.83	7410.75	7982.2
libDIA	E9PRG8	E9PRG8	C11orf98	Uncharacterized protein C11orf98	E9PRG8	CK098_HUMAN	4313.31	7325.3	8441.11			dirDIA	iRT-Kit_WR_fusion	iRT-Kit_WR_fusion			iRT-Kit_WR_fusion		11423.6	81328.2	3084.4
libDIA	O00148	O00148	DDX39A	ATP-dependent RNA helicase DDX39A	O00148	DX39A_HUMAN	39646.1	33883.1	44557.6			dirDIA	O00148	O00148	DDX39A	ATP-dependent RNA helicase DDX39A	O00148	DX39A_HUMAN	31751.8	25413.6	36770.9
libDIA	O00151	O00151	PDLIM1	PDZ and LIM domain protein 1	O00151	PDLI1_HUMAN	58679	87191.9	61405.2			dirDIA	O00151	O00151	PDLIM1	PDZ and LIM domain protein 1	O00151	PDLI1_HUMAN	27884	42033.2	56043.9
libDIA	O00154	O00154	ACOT7	Cytosolic acyl coenzyme A thioester hydrolase	O00154	BACH_HUMAN	Filtered	Filtered	7421.56			dirDIA	O00231	O00231	PSMD11	26S proteasome non-ATPase regulatory subunit 11	O00231	PSD11_HUMAN	2939.01	4758.66	4618.42
libDIA	O00161	O00161	SNAP23	Synaptosomal-associated protein 23	O00161	SNP23_HUMAN	Filtered	Filtered	1434.15			dirDIA	O00299	O00299	CLIC1	Chloride intracellular channel protein 1	O00299	CLIC1_HUMAN	22269.7	24847.7	22259.1
libDIA	O00231	O00231	PSMD11	26S proteasome non-ATPase regulatory subunit 11	O00231	PSD11_HUMAN	Filtered	Filtered	6755.65			dirDIA	O00303	O00303	EIF3F	Eukaryotic translation initiation factor 3 subunit F	O00303	EIF3F_HUMAN	3680.56	4676.25	8570.48
libDIA	O00232	O00232	PSMD12	26S proteasome non-ATPase regulatory subunit 12	O00232	PSD12_HUMAN	17408.8	14764.6	10000.5			dirDIA	O00410	O00410	IPO5	Importin-5	O00410	IPO5_HUMAN	4336.72	4569.08	6764.62
libDIA	O00299	O00299	CLIC1	Chloride intracellular channel protein 1	O00299	CLIC1_HUMAN	32633.9	42182.3	28839.8			dirDIA	O00425	O00425	IGF2BP3	Insulin-like growth factor 2 mRNA-binding protein 3	O00425	IF2B3_HUMAN	2310.11	2973.55	4712.02
libDIA	O00303	O00303	EIF3F	Eukaryotic translation initiation factor 3 subunit F	O00303	EIF3F_HUMAN	Filtered	Filtered	6882.22			dirDIA	O00483	O00483	NDUFA4	Cytochrome c oxidase subunit NDUFA4	O00483	NDUA4_HUMAN	7290.04	9425.88	7184.12
libDIA	O00410	O00410	IPO5	Importin-5	O00410	IPO5_HUMAN	6093.05	8071.25	7567.76			dirDIA	O00487	O00487	PSMD14	26S proteasome non-ATPase regulatory subunit 14	O00487	PSDE_HUMAN	6233.44	7866.66	9912.33
libDIA	O00425	O00425	IGF2BP3	Insulin-like growth factor 2 mRNA-binding protein 3	O00425	IF2B3_HUMAN	Filtered	Filtered	5271.04			dirDIA	O00506;Q9P289	O00506;Q9P289	STK25;STK26	Serine/threonine-protein kinase 25;Serine/threonine-protein kinase 26	O00506;Q9P289	STK25_HUMAN;STK26_HUMAN	2061.03	2240.23	1370.66
libDIA	O00483	O00483	NDUFA4	Cytochrome c oxidase subunit NDUFA4	O00483	NDUA4_HUMAN	7357.31	9345.39	7373.27			dirDIA	O00567	O00567	NOP56	Nucleolar protein 56	O00567	NOP56_HUMAN	4094.03	5025.95	3749.04
libDIA	O00487	O00487	PSMD14	26S proteasome non-ATPase regulatory subunit 14	O00487	PSDE_HUMAN	12611.2	14623	19851.5			dirDIA	O00571	O00571	DDX3X	ATP-dependent RNA helicase DDX3X	O00571	DDX3X_HUMAN	13888.9	19905.2	16069.7
libDIA	O00541	O00541	PES1	Pescadillo homolog	O00541	PESC_HUMAN	6731.93	6109.26	5278.37			dirDIA	O14744	O14744	PRMT5	Protein arginine N-methyltransferase 5	O14744	ANM5_HUMAN	6239.01	10250.8	8760.79
libDIA	O00567	O00567	NOP56	Nucleolar protein 56	O00567	NOP56_HUMAN	Filtered	7971.96	5751.26			dirDIA	O14818	O14818	PSMA7	Proteasome subunit alpha type-7	O14818	PSA7_HUMAN	39595.1	39537.2	31224.6
libDIA	O00571	O00571	DDX3X	ATP-dependent RNA helicase DDX3X	O00571	DDX3X_HUMAN	12787.2	25899.2	15786			dirDIA	O14950;P19105	O14950;P19105	MYL12B;MYL12A	Myosin regulatory light chain 12B;Myosin regulatory light chain 12A	O14950;P19105	ML12B_HUMAN;ML12A_HUMAN	11740.4	15421.2	17154.1
libDIA	O14602;P47813	O14602;P47813	EIF1AY;EIF1AX	Eukaryotic translation initiation factor 1A, Y-chromosomal;Eukaryotic translation initiation factor 1A, X-chromosomal	O14602;P47813	IF1AY_HUMAN;IF1AX_HUMAN	3292.72	Filtered	Filtered			dirDIA	O14979	O14979	HNRNPDL	Heterogeneous nuclear ribonucleoprotein D-like	O14979	HNRDL_HUMAN	23815.4	29647.7	26780.7
libDIA	O14737	O14737	PDCD5	Programmed cell death protein 5	O14737	PDCD5_HUMAN	Filtered	Filtered	4567.47			dirDIA	O14983;P16615	O14983;P16615	ATP2A1;ATP2A2	Sarcoplasmic/endoplasmic reticulum calcium ATPase 1;Sarcoplasmic/endoplasmic reticulum calcium ATPase 2	O14983;P16615	AT2A1_HUMAN;AT2A2_HUMAN	2636.38	2827.46	3452.79
libDIA	O14744	O14744	PRMT5	Protein arginine N-methyltransferase 5	O14744	ANM5_HUMAN	9819.36	15290	14266.6			dirDIA	O15143	O15143	ARPC1B	Actin-related protein 2/3 complex subunit 1B	O15143	ARC1B_HUMAN	5197.72	5486.94	6504.4
libDIA	O14776	O14776	TCERG1	Transcription elongation regulator 1	O14776	TCRG1_HUMAN	Filtered	Filtered	4097.09			dirDIA	O15144	O15144	ARPC2	Actin-related protein 2/3 complex subunit 2	O15144	ARPC2_HUMAN	15618.1	12814.9	12039.8
libDIA	O14818	O14818	PSMA7	Proteasome subunit alpha type-7	O14818	PSA7_HUMAN	37600.8	38363.9	30558.6			dirDIA	O15347	O15347	HMGB3	High mobility group protein B3	O15347	HMGB3_HUMAN	1728.9	2313.83	1811.13
libDIA	O14950;P19105	O14950;P19105	MYL12B;MYL12A	Myosin regulatory light chain 12B;Myosin regulatory light chain 12A	O14950;P19105	ML12B_HUMAN;ML12A_HUMAN	14328.9	21291	22680.4			dirDIA	O15355	O15355	PPM1G	Protein phosphatase 1G	O15355	PPM1G_HUMAN	1332.75	588.071	2366.45
libDIA	O14979	O14979	HNRNPDL	Heterogeneous nuclear ribonucleoprotein D-like	O14979	HNRDL_HUMAN	24928.6	57440.8	29299.1			dirDIA	O15371	O15371	EIF3D	Eukaryotic translation initiation factor 3 subunit D	O15371	EIF3D_HUMAN	9708.64	6732.45	9829.35
libDIA	O15042	O15042	U2SURP	U2 snRNP-associated SURP motif-containing protein	O15042	SR140_HUMAN	Filtered	Filtered	5223.84			dirDIA	O15511	O15511	ARPC5	Actin-related protein 2/3 complex subunit 5	O15511	ARPC5_HUMAN	32778.6	28268.6	24999.9
libDIA	O15067	O15067	PFAS	Phosphoribosylformylglycinamidine synthase	O15067	PUR4_HUMAN	Filtered	13975.5	3090.9			dirDIA	O15533	O15533	TAPBP	Tapasin	O15533	TPSN_HUMAN	20491.6	20597.8	11914.7
libDIA	O15143	O15143	ARPC1B	Actin-related protein 2/3 complex subunit 1B	O15143	ARC1B_HUMAN	8911.28	8708.71	7968.18			dirDIA	O43143	O43143	DHX15	Pre-mRNA-splicing factor ATP-dependent RNA helicase DHX15	O43143	DHX15_HUMAN	6801	7110.42	5496.54
libDIA	O15144	O15144	ARPC2	Actin-related protein 2/3 complex subunit 2	O15144	ARPC2_HUMAN	24326.8	22443.3	14366.2			dirDIA	O43169	O43169	CYB5B	Cytochrome b5 type B	O43169	CYB5B_HUMAN	15380.2	15497.6	15181.8
libDIA	O15145	O15145	ARPC3	Actin-related protein 2/3 complex subunit 3	O15145	ARPC3_HUMAN	15071.8	Filtered	4105.15			dirDIA	O43242	O43242	PSMD3	26S proteasome non-ATPase regulatory subunit 3	O43242	PSMD3_HUMAN	4589.8	5246.37	4876.17
libDIA	O15355	O15355	PPM1G	Protein phosphatase 1G	O15355	PPM1G_HUMAN	1589.42	Filtered	2843.31			dirDIA	O43324	O43324	EEF1E1	Eukaryotic translation elongation factor 1 epsilon-1	O43324	MCA3_HUMAN	4558.18	2908.89	2857.97
libDIA	O15371	O15371	EIF3D	Eukaryotic translation initiation factor 3 subunit D	O15371	EIF3D_HUMAN	9788.58	7988.8	9931.41			dirDIA	O43390	O43390	HNRNPR	Heterogeneous nuclear ribonucleoprotein R	O43390	HNRPR_HUMAN	4192.13	3082.84	6619.85
libDIA	O15511	O15511	ARPC5	Actin-related protein 2/3 complex subunit 5	O15511	ARPC5_HUMAN	25986.5	24674.4	21315.1			dirDIA	O43399	O43399	TPD52L2	Tumor protein D54	O43399	TPD54_HUMAN	6557.46	6258.34	5749.58
libDIA	O15533	O15533	TAPBP	Tapasin	O15533	TPSN_HUMAN	20334.2	20280.8	10843.6			dirDIA	O43670	O43670	ZNF207	BUB3-interacting and GLEBS motif-containing protein ZNF207	O43670	ZN207_HUMAN	13899.7	15638	13605
libDIA	O43143	O43143	DHX15	Pre-mRNA-splicing factor ATP-dependent RNA helicase DHX15	O43143	DHX15_HUMAN	9972.02	6519.28	7298.68			dirDIA	O43684	O43684	BUB3	Mitotic checkpoint protein BUB3	O43684	BUB3_HUMAN	9662.2	7638.56	7672.43
libDIA	O43169	O43169	CYB5B	Cytochrome b5 type B	O43169	CYB5B_HUMAN	16323.6	15801.4	16127.5			dirDIA	O43707	O43707	ACTN4	Alpha-actinin-4	O43707	ACTN4_HUMAN	3707.47	6261.54	6973.42
libDIA	O43175	O43175	PHGDH	D-3-phosphoglycerate dehydrogenase	O43175	SERA_HUMAN	3697.14	Filtered	3447.67			dirDIA	O43760	O43760	SYNGR2	Synaptogyrin-2	O43760	SNG2_HUMAN	45730.8	33541.8	30438.1
libDIA	O43242	O43242	PSMD3	26S proteasome non-ATPase regulatory subunit 3	O43242	PSMD3_HUMAN	7724.62	8504.47	6487.69			dirDIA	O43776	O43776	NARS	Asparagine--tRNA ligase, cytoplasmic	O43776	SYNC_HUMAN	4118.33	4393.69	4433.21
libDIA	O43390	O43390	HNRNPR	Heterogeneous nuclear ribonucleoprotein R	O43390	HNRPR_HUMAN	19121.4	19987.2	19243.9			dirDIA	O43790;Q14533	O43790;Q14533	KRT86;KRT81	Keratin, type II cuticular Hb6;Keratin, type II cuticular Hb1	O43790;Q14533	KRT86_HUMAN;KRT81_HUMAN	113.674	24105.7	669.113
libDIA	O43396	O43396	TXNL1	Thioredoxin-like protein 1	O43396	TXNL1_HUMAN	Filtered	Filtered	8924.72			dirDIA	O43809	O43809	NUDT21	Cleavage and polyadenylation specificity factor subunit 5	O43809	CPSF5_HUMAN	3776.23	2069.22	6596.64
libDIA	O43399	O43399	TPD52L2	Tumor protein D54	O43399	TPD54_HUMAN	9048.59	Filtered	4137.38			dirDIA	O43837	O43837	IDH3B	Isocitrate dehydrogenase [NAD] subunit beta, mitochondrial	O43837	IDH3B_HUMAN	2075.76	2802.42	2197.26
libDIA	O43670	O43670	ZNF207	BUB3-interacting and GLEBS motif-containing protein ZNF207	O43670	ZN207_HUMAN	14644.1	16500.4	14809.1			dirDIA	O60220	O60220	TIMM8A	Mitochondrial import inner membrane translocase subunit Tim8 A	O60220	TIM8A_HUMAN	2077.06	854.486	3377.22
libDIA	O43684	O43684	BUB3	Mitotic checkpoint protein BUB3	O43684	BUB3_HUMAN	16974.8	10364.3	9423.54			dirDIA	O60264;P28370	O60264;P28370	SMARCA5;SMARCA1	SWI/SNF-related matrix-associated actin-dependent regulator of chromatin subfamily A member 5;Probable global transcription activator SNF2L1	O60264;P28370	SMCA5_HUMAN;SMCA1_HUMAN	7012.71	6929.32	3976.23
libDIA	O43707	O43707	ACTN4	Alpha-actinin-4	O43707	ACTN4_HUMAN	4627.7	6342.29	5598.63			dirDIA	O60506	O60506	SYNCRIP	Heterogeneous nuclear ribonucleoprotein Q	O60506	HNRPQ_HUMAN	28054.5	25344.3	20409
libDIA	O43760	O43760	SYNGR2	Synaptogyrin-2	O43760	SNG2_HUMAN	46267.2	33384.9	17635.5			dirDIA	O60664	O60664	PLIN3	Perilipin-3	O60664	PLIN3_HUMAN	2749.63	3720.92	5371.46
libDIA	O43776	O43776	NARS	Asparagine--tRNA ligase, cytoplasmic	O43776	SYNC_HUMAN	13000.6	13727.9	5628.57			dirDIA	O60711	O60711	LPXN	Leupaxin	O60711	LPXN_HUMAN	4151.33	5105.81	7564.18
libDIA	O43809	O43809	NUDT21	Cleavage and polyadenylation specificity factor subunit 5	O43809	CPSF5_HUMAN	3690.62	Filtered	5990.69			dirDIA	O60739;P41567	O60739;P41567	EIF1B;EIF1	Eukaryotic translation initiation factor 1b;Eukaryotic translation initiation factor 1	O60739;P41567	EIF1B_HUMAN;EIF1_HUMAN	1150.1	3148.82	3838.91
libDIA	O43818	O43818	RRP9	U3 small nucleolar RNA-interacting protein 2	O43818	U3IP2_HUMAN	Filtered	Filtered	3014.24			dirDIA	O60749	O60749	SNX2	Sorting nexin-2	O60749	SNX2_HUMAN	2800.72	4903.45	3796.11
libDIA	O43837	O43837	IDH3B	Isocitrate dehydrogenase [NAD] subunit beta, mitochondrial	O43837	IDH3B_HUMAN	5827.68	Filtered	3017.12			dirDIA	O60814;P57053;P58876;P62807;Q5QNW6;Q93079;Q99877;Q99879;Q99880	O60814;P57053;P58876;P62807;Q5QNW6;Q93079;Q99877;Q99879;Q99880	HIST1H2BK;H2BFS;HIST1H2BD;HIST1H2BC;HIST2H2BF;HIST1H2BH;HIST1H2BN;HIST1H2BM;HIST1H2BL	Histone H2B type 1-K;Histone H2B type F-S;Histone H2B type 1-D;Histone H2B type 1-C/E/F/G/I;Histone H2B type 2-F;Histone H2B type 1-H;Histone H2B type 1-N;Histone H2B type 1-M;Histone H2B type 1-L	O60814;P57053;P58876;P62807;Q5QNW6;Q93079;Q99877;Q99879;Q99880	H2B1K_HUMAN;H2BFS_HUMAN;H2B1D_HUMAN;H2B1C_HUMAN;H2B2F_HUMAN;H2B1H_HUMAN;H2B1N_HUMAN;H2B1M_HUMAN;H2B1L_HUMAN	233457	256464	333313
libDIA	O60220	O60220	TIMM8A	Mitochondrial import inner membrane translocase subunit Tim8 A	O60220	TIM8A_HUMAN	Filtered	Filtered	4966.78			dirDIA	O60841	O60841	EIF5B	Eukaryotic translation initiation factor 5B	O60841	IF2P_HUMAN	5726.31	5918.63	4156.42
libDIA	O60264	O60264	SMARCA5	SWI/SNF-related matrix-associated actin-dependent regulator of chromatin subfamily A member 5	O60264	SMCA5_HUMAN	Filtered	7566.53	5096.77			dirDIA	O60884	O60884	DNAJA2	DnaJ homolog subfamily A member 2	O60884	DNJA2_HUMAN	1773.68	5209.14	4374.33
libDIA	O60506	O60506	SYNCRIP	Heterogeneous nuclear ribonucleoprotein Q	O60506	HNRPQ_HUMAN	11819.1	26324.9	11640.7			dirDIA	O60925	O60925	PFDN1	Prefoldin subunit 1	O60925	PFD1_HUMAN	2589.66	5256.82	6992.22
libDIA	O60664	O60664	PLIN3	Perilipin-3	O60664	PLIN3_HUMAN	Filtered	Filtered	4383.54			dirDIA	O75083	O75083	WDR1	WD repeat-containing protein 1	O75083	WDR1_HUMAN	20642.2	21716.1	20217
libDIA	O60711	O60711	LPXN	Leupaxin	O60711	LPXN_HUMAN	Filtered	Filtered	7852.26			dirDIA	O75342	O75342	ALOX12B	Arachidonate 12-lipoxygenase, 12R-type	O75342	LX12B_HUMAN	1799.11	1	3845.53
libDIA	O60739;P41567	O60739;P41567	EIF1B;EIF1	Eukaryotic translation initiation factor 1b;Eukaryotic translation initiation factor 1	O60739;P41567	EIF1B_HUMAN;EIF1_HUMAN	Filtered	Filtered	4586			dirDIA	O75347	O75347	TBCA	Tubulin-specific chaperone A	O75347	TBCA_HUMAN	12376.6	13907.8	11829.1
libDIA	O60749	O60749	SNX2	Sorting nexin-2	O60749	SNX2_HUMAN	Filtered	Filtered	3081.25			dirDIA	O75367	O75367	H2AFY	Core histone macro-H2A.1	O75367	H2AY_HUMAN	8981.15	15934.6	18479.3
libDIA	O60762	O60762	DPM1	Dolichol-phosphate mannosyltransferase subunit 1	O60762	DPM1_HUMAN	Filtered	4716.6	6568.95			dirDIA	O75368	O75368	SH3BGRL	SH3 domain-binding glutamic acid-rich-like protein	O75368	SH3L1_HUMAN	4191.53	3773.18	7184.66
libDIA	O60814;P57053;P58876;P62807;Q5QNW6;Q93079;Q99877;Q99879;Q99880	O60814;P57053;P58876;P62807;Q5QNW6;Q93079;Q99877;Q99879;Q99880	HIST1H2BK;H2BFS;HIST1H2BD;HIST1H2BC;HIST2H2BF;HIST1H2BH;HIST1H2BN;HIST1H2BM;HIST1H2BL	Histone H2B type 1-K;Histone H2B type F-S;Histone H2B type 1-D;Histone H2B type 1-C/E/F/G/I;Histone H2B type 2-F;Histone H2B type 1-H;Histone H2B type 1-N;Histone H2B type 1-M;Histone H2B type 1-L	O60814;P57053;P58876;P62807;Q5QNW6;Q93079;Q99877;Q99879;Q99880	H2B1K_HUMAN;H2BFS_HUMAN;H2B1D_HUMAN;H2B1C_HUMAN;H2B2F_HUMAN;H2B1H_HUMAN;H2B1N_HUMAN;H2B1M_HUMAN;H2B1L_HUMAN	242338	260108	354303			dirDIA	O75390	O75390	CS	Citrate synthase, mitochondrial	O75390	CISY_HUMAN	16375.9	35480.5	19363.9
libDIA	O60841	O60841	EIF5B	Eukaryotic translation initiation factor 5B	O60841	IF2P_HUMAN	9003.24	9424.8	6775.55			dirDIA	O75396	O75396	SEC22B	Vesicle-trafficking protein SEC22b	O75396	SC22B_HUMAN	2039.78	2952.6	7488.29
libDIA	O60884	O60884	DNAJA2	DnaJ homolog subfamily A member 2	O60884	DNJA2_HUMAN	Filtered	4445.65	3980.78			dirDIA	O75400	O75400	PRPF40A	Pre-mRNA-processing factor 40 homolog A	O75400	PR40A_HUMAN	2653.57	2436.7	4695.16
libDIA	O60925	O60925	PFDN1	Prefoldin subunit 1	O60925	PFD1_HUMAN	Filtered	7586.8	8764.55			dirDIA	O75439	O75439	PMPCB	Mitochondrial-processing peptidase subunit beta	O75439	MPPB_HUMAN	10829.3	8456.81	6533.13
libDIA	O75083	O75083	WDR1	WD repeat-containing protein 1	O75083	WDR1_HUMAN	Filtered	19896.8	10175.1			dirDIA	O75475	O75475	PSIP1	PC4 and SFRS1-interacting protein	O75475	PSIP1_HUMAN	6240.33	7452.96	5007.61
libDIA	O75131	O75131	CPNE3	Copine-3	O75131	CPNE3_HUMAN	Filtered	Filtered	3707.7			dirDIA	O75489	O75489	NDUFS3	NADH dehydrogenase [ubiquinone] iron-sulfur protein 3, mitochondrial	O75489	NDUS3_HUMAN	2951.39	2079.91	4289.54
libDIA	O75347	O75347	TBCA	Tubulin-specific chaperone A	O75347	TBCA_HUMAN	12342.5	25039.1	27937			dirDIA	O75494;Q8WXF0	O75494;Q8WXF0	SRSF10;SRSF12	Serine/arginine-rich splicing factor 10;Serine/arginine-rich splicing factor 12	O75494;Q8WXF0	SRS10_HUMAN;SRS12_HUMAN	2717.88	4196.84	4909.15
libDIA	O75367	O75367	H2AFY	Core histone macro-H2A.1	O75367	H2AY_HUMAN	24056.6	33713.8	21464.6			dirDIA	O75534	O75534	CSDE1	Cold shock domain-containing protein E1	O75534	CSDE1_HUMAN	4126.13	4088.69	3158.02
libDIA	O75368	O75368	SH3BGRL	SH3 domain-binding glutamic acid-rich-like protein	O75368	SH3L1_HUMAN	Filtered	Filtered	9187.86			dirDIA	O75608	O75608	LYPLA1	Acyl-protein thioesterase 1	O75608	LYPA1_HUMAN	3896.57	6742.54	6691.44
libDIA	O75390	O75390	CS	Citrate synthase, mitochondrial	O75390	CISY_HUMAN	24443.1	32336.1	20486.5			dirDIA	O75643	O75643	SNRNP200	U5 small nuclear ribonucleoprotein 200 kDa helicase	O75643	U520_HUMAN	2163.24	3879.53	3129.37
libDIA	O75396	O75396	SEC22B	Vesicle-trafficking protein SEC22b	O75396	SC22B_HUMAN	Filtered	2911.69	5690.32			dirDIA	O75746;Q9UJS0	O75746;Q9UJS0	SLC25A12;SLC25A13	Calcium-binding mitochondrial carrier protein Aralar1;Calcium-binding mitochondrial carrier protein Aralar2	O75746;Q9UJS0	CMC1_HUMAN;CMC2_HUMAN	7557.48	6906.06	5575.96
libDIA	O75400	O75400	PRPF40A	Pre-mRNA-processing factor 40 homolog A	O75400	PR40A_HUMAN	Filtered	Filtered	4241.12			dirDIA	O75821	O75821	EIF3G	Eukaryotic translation initiation factor 3 subunit G	O75821	EIF3G_HUMAN	9063.15	9556.06	7535.03
libDIA	O75436	O75436	VPS26A	Vacuolar protein sorting-associated protein 26A	O75436	VP26A_HUMAN	Filtered	Filtered	7937.4			dirDIA	O75822	O75822	EIF3J	Eukaryotic translation initiation factor 3 subunit J	O75822	EIF3J_HUMAN	5421.21	5532.43	1636.39
libDIA	O75475	O75475	PSIP1	PC4 and SFRS1-interacting protein	O75475	PSIP1_HUMAN	Filtered	Filtered	6417.45			dirDIA	O75937	O75937	DNAJC8	DnaJ homolog subfamily C member 8	O75937	DNJC8_HUMAN	1415.25	1302.3	4655.24
libDIA	O75477;O94905	O75477;O94905	ERLIN1;ERLIN2	Erlin-1;Erlin-2	O75477;O94905	ERLN1_HUMAN;ERLN2_HUMAN	Filtered	Filtered	4322.27			dirDIA	O75947	O75947	ATP5H	ATP synthase subunit d, mitochondrial	O75947	ATP5H_HUMAN	19480.2	19424.3	13564
libDIA	O75489	O75489	NDUFS3	NADH dehydrogenase [ubiquinone] iron-sulfur protein 3, mitochondrial	O75489	NDUS3_HUMAN	Filtered	Filtered	4940.9			dirDIA	O75964	O75964	ATP5L	ATP synthase subunit g, mitochondrial	O75964	ATP5L_HUMAN	19356	20058.8	27623.5
libDIA	O75494;Q8WXF0	O75494;Q8WXF0	SRSF10;SRSF12	Serine/arginine-rich splicing factor 10;Serine/arginine-rich splicing factor 12	O75494;Q8WXF0	SRS10_HUMAN;SRS12_HUMAN	Filtered	5316.11	4899.13			dirDIA	O76003	O76003	GLRX3	Glutaredoxin-3	O76003	GLRX3_HUMAN	8713.47	11024.7	14408.9
libDIA	O75534	O75534	CSDE1	Cold shock domain-containing protein E1	O75534	CSDE1_HUMAN	Filtered	2488.78	3931.04			dirDIA	O76011	O76011	KRT34	Keratin, type I cuticular Ha4	O76011	KRT34_HUMAN	310.023	13482.1	1005.05
libDIA	O75608	O75608	LYPLA1	Acyl-protein thioesterase 1	O75608	LYPA1_HUMAN	10617.9	8316.92	6403.15			dirDIA	O76013	O76013	KRT36	Keratin, type I cuticular Ha6	O76013	KRT36_HUMAN	1	11183.7	2509.56
libDIA	O75643	O75643	SNRNP200	U5 small nuclear ribonucleoprotein 200 kDa helicase	O75643	U520_HUMAN	Filtered	Filtered	3150.99			dirDIA	O76021	O76021	RSL1D1	Ribosomal L1 domain-containing protein 1	O76021	RL1D1_HUMAN	3665.47	2694.27	8180.18
libDIA	O75746	O75746	SLC25A12	Calcium-binding mitochondrial carrier protein Aralar1	O75746	CMC1_HUMAN	Filtered	Filtered	4690.97			dirDIA	O94776;Q13330;Q9BTC8	O94776;Q13330;Q9BTC8	MTA2;MTA1;MTA3	Metastasis-associated protein MTA2;Metastasis-associated protein MTA1;Metastasis-associated protein MTA3	O94776;Q13330;Q9BTC8	MTA2_HUMAN;MTA1_HUMAN;MTA3_HUMAN	836.947	889.001	4520.28
libDIA	O75821	O75821	EIF3G	Eukaryotic translation initiation factor 3 subunit G	O75821	EIF3G_HUMAN	15050.6	18235.3	9519.11			dirDIA	O95168	O95168	NDUFB4	NADH dehydrogenase [ubiquinone] 1 beta subcomplex subunit 4	O95168	NDUB4_HUMAN	1197.66	4154.07	6836.75
libDIA	O75937	O75937	DNAJC8	DnaJ homolog subfamily C member 8	O75937	DNJC8_HUMAN	3159.75	Filtered	5788.42			dirDIA	O95292;Q9P0L0	O95292;Q9P0L0	VAPB;VAPA	Vesicle-associated membrane protein-associated protein B/C;Vesicle-associated membrane protein-associated protein A	O95292;Q9P0L0	VAPB_HUMAN;VAPA_HUMAN	10024.6	4839.16	14790.5
libDIA	O75947	O75947	ATP5H	ATP synthase subunit d, mitochondrial	O75947	ATP5H_HUMAN	22100.7	22259.4	14993.4			dirDIA	O95336	O95336	PGLS	6-phosphogluconolactonase	O95336	6PGL_HUMAN	5068.5	8194.36	6854.22
libDIA	O75964	O75964	ATP5L	ATP synthase subunit g, mitochondrial	O75964	ATP5L_HUMAN	30458.3	30405.3	26761.3			dirDIA	O95347	O95347	SMC2	Structural maintenance of chromosomes protein 2	O95347	SMC2_HUMAN	5258.43	5159.93	7251.74
libDIA	O76003	O76003	GLRX3	Glutaredoxin-3	O76003	GLRX3_HUMAN	8435.53	12868	13274.4			dirDIA	O95373	O95373	IPO7	Importin-7	O95373	IPO7_HUMAN	4396.1	3529.66	3817.79
libDIA	O76021	O76021	RSL1D1	Ribosomal L1 domain-containing protein 1	O76021	RL1D1_HUMAN	7438.12	14529.1	10813.9			dirDIA	O95433	O95433	AHSA1	Activator of 90 kDa heat shock protein ATPase homolog 1	O95433	AHSA1_HUMAN	10211.8	5744.06	14844.3
libDIA	O94776	O94776	MTA2	Metastasis-associated protein MTA2	O94776	MTA2_HUMAN	16207.6	14405.9	5393.87			dirDIA	O95757	O95757	HSPA4L	Heat shock 70 kDa protein 4L	O95757	HS74L_HUMAN	3093.67	2125.51	6243.66
libDIA	O94805;O96019	O94805;O96019	ACTL6B;ACTL6A	Actin-like protein 6B;Actin-like protein 6A	O94805;O96019	ACL6B_HUMAN;ACL6A_HUMAN	Filtered	Filtered	4550.46			dirDIA	O95861	O95861	BPNT1	3'(2'),5'-bisphosphate nucleotidase 1	O95861	BPNT1_HUMAN	1298.91	4808.09	2789.65
libDIA	O94826	O94826	TOMM70A	Mitochondrial import receptor subunit TOM70	O94826	TOM70_HUMAN	Filtered	Filtered	5689.41			dirDIA	P00338	P00338	LDHA	L-lactate dehydrogenase A chain	P00338	LDHA_HUMAN	276557	245183	218011
libDIA	O95202	O95202	LETM1	LETM1 and EF-hand domain-containing protein 1, mitochondrial	O95202	LETM1_HUMAN	Filtered	6130.48	2364.54			dirDIA	P00387	P00387	CYB5R3	NADH-cytochrome b5 reductase 3	P00387	NB5R3_HUMAN	2280.2	5161.92	4352
libDIA	O95292;Q9P0L0	O95292;Q9P0L0	VAPB;VAPA	Vesicle-associated membrane protein-associated protein B/C;Vesicle-associated membrane protein-associated protein A	O95292;Q9P0L0	VAPB_HUMAN;VAPA_HUMAN	9838.78	4840.08	14315			dirDIA	P00403	P00403	MT-CO2	Cytochrome c oxidase subunit 2	P00403	COX2_HUMAN	37875.5	31737.1	56182.1
libDIA	O95336	O95336	PGLS	6-phosphogluconolactonase	O95336	6PGL_HUMAN	5413.57	5899.34	5151.97			dirDIA	P00441	P00441	SOD1	Superoxide dismutase [Cu-Zn]	P00441	SODC_HUMAN	9677.95	7278.42	21138.1
libDIA	O95347	O95347	SMC2	Structural maintenance of chromosomes protein 2	O95347	SMC2_HUMAN	9709.87	9740.89	10424.7			dirDIA	P00491	P00491	PNP	Purine nucleoside phosphorylase	P00491	PNPH_HUMAN	5129.52	4390.61	2433.71
libDIA	O95433	O95433	AHSA1	Activator of 90 kDa heat shock protein ATPase homolog 1	O95433	AHSA1_HUMAN	6933.34	Filtered	8152.59			dirDIA	P00492	P00492	HPRT1	Hypoxanthine-guanine phosphoribosyltransferase	P00492	HPRT_HUMAN	3516.58	2697.79	4416.68
libDIA	O95757	O95757	HSPA4L	Heat shock 70 kDa protein 4L	O95757	HS74L_HUMAN	Filtered	Filtered	2487.75			dirDIA	P00505	P00505	GOT2	Aspartate aminotransferase, mitochondrial	P00505	AATM_HUMAN	17427.6	20875.1	22241.8
libDIA	O95861	O95861	BPNT1	3'(2'),5'-bisphosphate nucleotidase 1	O95861	BPNT1_HUMAN	Filtered	3255.84	3744.18			dirDIA	P00558	P00558	PGK1	Phosphoglycerate kinase 1	P00558	PGK1_HUMAN	76122.7	57585.7	76574.3
libDIA	P00338	P00338	LDHA	L-lactate dehydrogenase A chain	P00338	LDHA_HUMAN	276623	241839	224116			dirDIA	P01008	P01008	SERPINC1	Antithrombin-III	P01008	ANT3_HUMAN	18481.4	20746.9	10104.5
libDIA	P00374;Q86XF0	P00374;Q86XF0	DHFR;DHFRL1	Dihydrofolate reductase;Dihydrofolate reductase, mitochondrial	P00374;Q86XF0	DYR_HUMAN;DYRL1_HUMAN	Filtered	Filtered	4646.24			dirDIA	P01040	P01040	CSTA	Cystatin-A	P01040	CYTA_HUMAN	4852.07	1540.72	6622.35
libDIA	P00387	P00387	CYB5R3	NADH-cytochrome b5 reductase 3	P00387	NB5R3_HUMAN	3328.21	3777.03	4742.1			dirDIA	P01834	P01834	IGKC	Ig kappa chain C region	P01834	IGKC_HUMAN	5955.24	9565.82	9678.25
libDIA	P00390	P00390	GSR	Glutathione reductase, mitochondrial	P00390	GSHR_HUMAN	Filtered	Filtered	7738.79			dirDIA	P01871	P01871	IGHM	Ig mu chain C region	P01871	IGHM_HUMAN	28080.4	14378.4	28324.7
libDIA	P00403	P00403	MT-CO2	Cytochrome c oxidase subunit 2	P00403	COX2_HUMAN	42487.8	36592.7	65689.7			dirDIA	P01903	P01903	HLA-DRA	HLA class II histocompatibility antigen, DR alpha chain	P01903	DRA_HUMAN	10282.3	9340.23	17118.9
libDIA	P00441	P00441	SOD1	Superoxide dismutase [Cu-Zn]	P00441	SODC_HUMAN	20342.1	8047.45	22718.4			dirDIA	P01911	P01911	HLA-DRB1	HLA class II histocompatibility antigen, DRB1-15 beta chain	P01911	2B1F_HUMAN	69527.1	53595.6	48914.8
libDIA	P00491	P00491	PNP	Purine nucleoside phosphorylase	P00491	PNPH_HUMAN	6112.53	Filtered	3537.81			dirDIA	P01920	P01920	HLA-DQB1	HLA class II histocompatibility antigen, DQ beta 1 chain	P01920	DQB1_HUMAN	18016.3	23134.5	18615.7
libDIA	P00492	P00492	HPRT1	Hypoxanthine-guanine phosphoribosyltransferase	P00492	HPRT_HUMAN	Filtered	3532.93	6763.84			dirDIA	P02042;P02100;P68871;P69891;P69892	P02042;P02100;P68871;P69891;P69892	HBD;HBE1;HBB;HBG1;HBG2	Hemoglobin subunit delta;Hemoglobin subunit epsilon;Hemoglobin subunit beta;Hemoglobin subunit gamma-1;Hemoglobin subunit gamma-2	P02042;P02100;P68871;P69891;P69892	HBD_HUMAN;HBE_HUMAN;HBB_HUMAN;HBG1_HUMAN;HBG2_HUMAN	12715.5	7787.72	9457.75
libDIA	P00505	P00505	GOT2	Aspartate aminotransferase, mitochondrial	P00505	AATM_HUMAN	16388.1	23004.3	23924.4			dirDIA	P02533	P02533	KRT14	Keratin, type I cytoskeletal 14	P02533	K1C14_HUMAN	47288.6	229760	243121
libDIA	P00558	P00558	PGK1	Phosphoglycerate kinase 1	P00558	PGK1_HUMAN	76682.3	57102.3	79007.5			dirDIA	P02538	P02538	KRT6A	Keratin, type II cytoskeletal 6A	P02538	K2C6A_HUMAN	90602.8	134226	290315
libDIA	P01040	P01040	CSTA	Cystatin-A	P01040	CYTA_HUMAN	6442.78	Filtered	10362.8			dirDIA	P02545	P02545	LMNA	Prelamin-A/C	P02545	LMNA_HUMAN	25399.2	31553	30163.4
libDIA	P01834	P01834	IGKC	Ig kappa chain C region	P01834	IGKC_HUMAN	7051.88	10102.4	10129.2			dirDIA	P02656	P02656	APOC3	Apolipoprotein C-III	P02656	APOC3_HUMAN	6745.03	11197.1	5414.4
libDIA	P01871	P01871	IGHM	Ig mu chain C region	P01871	IGHM_HUMAN	33163	18185.6	33339.8			dirDIA	P02768	P02768	ALB	Serum albumin	P02768	ALBU_HUMAN	1.06795e+06	34794716	10860387
libDIA	P01903	P01903	HLA-DRA	HLA class II histocompatibility antigen, DR alpha chain	P01903	DRA_HUMAN	14013.7	21258.5	22664.4			dirDIA	P02786	P02786	TFRC	Transferrin receptor protein 1	P02786	TFR1_HUMAN	4341.84	4141.15	3750.22
libDIA	P01911	P01911	HLA-DRB1	HLA class II histocompatibility antigen, DRB1-15 beta chain	P01911	2B1F_HUMAN	69605.5	52721.7	49836.8			dirDIA	P02788	P02788	LTF	Lactotransferrin	P02788	TRFL_HUMAN	18553.5	27298.9	19390.3
libDIA	P01920	P01920	HLA-DQB1	HLA class II histocompatibility antigen, DQ beta 1 chain	P01920	DQB1_HUMAN	19009.7	15140.1	19360.1			dirDIA	P04040	P04040	CAT	Catalase	P04040	CATA_HUMAN	3748.24	1249.67	5245.26
libDIA	P02042;P02100;P68871;P69891;P69892	P02042;P02100;P68871;P69891;P69892	HBD;HBE1;HBB;HBG1;HBG2	Hemoglobin subunit delta;Hemoglobin subunit epsilon;Hemoglobin subunit beta;Hemoglobin subunit gamma-1;Hemoglobin subunit gamma-2	P02042;P02100;P68871;P69891;P69892	HBD_HUMAN;HBE_HUMAN;HBB_HUMAN;HBG1_HUMAN;HBG2_HUMAN	17825.5	9799.43	13077.1			dirDIA	P04075	P04075	ALDOA	Fructose-bisphosphate aldolase A	P04075	ALDOA_HUMAN	188090	155750	144848
libDIA	P02533	P02533	KRT14	Keratin, type I cytoskeletal 14	P02533	K1C14_HUMAN	39147.9	170557	164802			dirDIA	P04080	P04080	CSTB	Cystatin-B	P04080	CYTB_HUMAN	5557.04	10784.1	6388.19
libDIA	P02538;P48668	P02538;P48668	KRT6A;KRT6C	Keratin, type II cytoskeletal 6A;Keratin, type II cytoskeletal 6C	P02538;P48668	K2C6A_HUMAN;K2C6C_HUMAN	33538.8	41323.7	143331			dirDIA	P04259	P04259	KRT6B	Keratin, type II cytoskeletal 6B	P04259	K2C6B_HUMAN	339.615	20174.1	Filtered
libDIA	P02545	P02545	LMNA	Prelamin-A/C	P02545	LMNA_HUMAN	27210	33611.2	32938			dirDIA	P04264	P04264	KRT1	Keratin, type II cytoskeletal 1	P04264	K2C1_HUMAN	1.90973e+06	816884	2490968
libDIA	P02768	P02768	ALB	Serum albumin	P02768	ALBU_HUMAN	76992368	41167556	86322184			dirDIA	P04406	P04406	GAPDH	Glyceraldehyde-3-phosphate dehydrogenase	P04406	G3P_HUMAN	249412	231703	268466
libDIA	P02786	P02786	TFRC	Transferrin receptor protein 1	P02786	TFR1_HUMAN	7053.12	9588.04	9377.07			dirDIA	P04440	P04440	HLA-DPB1	HLA class II histocompatibility antigen, DP beta 1 chain	P04440	DPB1_HUMAN	16334.9	16556.1	11747.6
libDIA	P02788	P02788	LTF	Lactotransferrin	P02788	TRFL_HUMAN	19269.4	26760.8	19635.9			dirDIA	P04843	P04843	RPN1	Dolichyl-diphosphooligosaccharide--protein glycosyltransferase subunit 1	P04843	RPN1_HUMAN	17300.3	18573.7	17188.5
libDIA	P04040	P04040	CAT	Catalase	P04040	CATA_HUMAN	3149.63	Filtered	7189.87			dirDIA	P04844	P04844	RPN2	Dolichyl-diphosphooligosaccharide--protein glycosyltransferase subunit 2	P04844	RPN2_HUMAN	3443.88	3290.96	1582.91
libDIA	P04075	P04075	ALDOA	Fructose-bisphosphate aldolase A	P04075	ALDOA_HUMAN	190579	155515	151597			dirDIA	P04908;P0C0S8;P20671;Q16777;Q6FI13;Q7L7L0;Q93077;Q96KK5;Q99878;Q9BTM1	P04908;P0C0S8;P20671;Q16777;Q6FI13;Q7L7L0;Q93077;Q96KK5;Q99878;Q9BTM1	HIST1H2AB;HIST1H2AG;HIST1H2AD;HIST2H2AC;HIST2H2AA3;HIST3H2A;HIST1H2AC;HIST1H2AH;HIST1H2AJ;H2AFJ	Histone H2A type 1-B/E;Histone H2A type 1;Histone H2A type 1-D;Histone H2A type 2-C;Histone H2A type 2-A;Histone H2A type 3;Histone H2A type 1-C;Histone H2A type 1-H;Histone H2A type 1-J;Histone H2A.J	P04908;P0C0S8;P20671;Q16777;Q6FI13;Q7L7L0;Q93077;Q96KK5;Q99878;Q9BTM1	H2A1B_HUMAN;H2A1_HUMAN;H2A1D_HUMAN;H2A2C_HUMAN;H2A2A_HUMAN;H2A3_HUMAN;H2A1C_HUMAN;H2A1H_HUMAN;H2A1J_HUMAN;H2AJ_HUMAN	1.63527e+06	1.64905e+06	1212111
libDIA	P04080	P04080	CSTB	Cystatin-B	P04080	CYTB_HUMAN	9519.46	10764.9	6681.32			dirDIA	P05023	P05023	ATP1A1	Sodium/potassium-transporting ATPase subunit alpha-1	P05023	AT1A1_HUMAN	5557.28	8334	5612.08
libDIA	P04233	P04233	CD74	HLA class II histocompatibility antigen gamma chain	P04233	HG2A_HUMAN	Filtered	Filtered	2557.74			dirDIA	P05089	P05089	ARG1	Arginase-1	P05089	ARGI1_HUMAN	Filtered	Filtered	13358.6
libDIA	P04264	P04264	KRT1	Keratin, type II cytoskeletal 1	P04264	K2C1_HUMAN	1.10087e+06	517388	3962280			dirDIA	P05109	P05109	S100A8	Protein S100-A8	P05109	S10A8_HUMAN	656.996	1915.16	6476.5
libDIA	P04406	P04406	GAPDH	Glyceraldehyde-3-phosphate dehydrogenase	P04406	G3P_HUMAN	187513	146954	106398			dirDIA	P05141	P05141	SLC25A5	ADP/ATP translocase 2	P05141	ADT2_HUMAN	47872.4	53557	58499.4
libDIA	P04440	P04440	HLA-DPB1	HLA class II histocompatibility antigen, DP beta 1 chain	P04440	DPB1_HUMAN	17346.7	17461.9	12741.3			dirDIA	P05161	P05161	ISG15	Ubiquitin-like protein ISG15	P05161	ISG15_HUMAN	4611.28	4191.35	Filtered
libDIA	P04792	P04792	HSPB1	Heat shock protein beta-1	P04792	HSPB1_HUMAN	Filtered	7317.21	5363.76			dirDIA	P05198	P05198	EIF2S1	Eukaryotic translation initiation factor 2 subunit 1	P05198	IF2A_HUMAN	9077.4	8107.88	10258.4
libDIA	P04843	P04843	RPN1	Dolichyl-diphosphooligosaccharide--protein glycosyltransferase subunit 1	P04843	RPN1_HUMAN	9678.08	10842.6	15450.5			dirDIA	P05387	P05387	RPLP2	60S acidic ribosomal protein P2	P05387	RLA2_HUMAN	57290.6	50762.2	62521.3
libDIA	P04844	P04844	RPN2	Dolichyl-diphosphooligosaccharide--protein glycosyltransferase subunit 2	P04844	RPN2_HUMAN	11917.6	10173.7	5205.35			dirDIA	P05388	P05388	RPLP0	60S acidic ribosomal protein P0	P05388	RLA0_HUMAN	18908.8	20200.5	21312
libDIA	P04908;P0C0S8;P20671;Q16777;Q6FI13;Q7L7L0;Q93077;Q96KK5;Q99878;Q9BTM1	P04908;P0C0S8;P20671;Q16777;Q6FI13;Q7L7L0;Q93077;Q96KK5;Q99878;Q9BTM1	HIST1H2AB;HIST1H2AG;HIST1H2AD;HIST2H2AC;HIST2H2AA3;HIST3H2A;HIST1H2AC;HIST1H2AH;HIST1H2AJ;H2AFJ	Histone H2A type 1-B/E;Histone H2A type 1;Histone H2A type 1-D;Histone H2A type 2-C;Histone H2A type 2-A;Histone H2A type 3;Histone H2A type 1-C;Histone H2A type 1-H;Histone H2A type 1-J;Histone H2A.J	P04908;P0C0S8;P20671;Q16777;Q6FI13;Q7L7L0;Q93077;Q96KK5;Q99878;Q9BTM1	H2A1B_HUMAN;H2A1_HUMAN;H2A1D_HUMAN;H2A2C_HUMAN;H2A2A_HUMAN;H2A3_HUMAN;H2A1C_HUMAN;H2A1H_HUMAN;H2A1J_HUMAN;H2AJ_HUMAN	2.48967e+06	2.47978e+06	1.25191e+06			dirDIA	P05787	P05787	KRT8	Keratin, type II cytoskeletal 8	P05787	K2C8_HUMAN	44092	26625.9	12374
libDIA	P05023	P05023	ATP1A1	Sodium/potassium-transporting ATPase subunit alpha-1	P05023	AT1A1_HUMAN	7008.99	14052	5551.78			dirDIA	P06454	P06454	PTMA	Prothymosin alpha	P06454	PTMA_HUMAN	11655.2	35595.8	2154.14
libDIA	P05141	P05141	SLC25A5	ADP/ATP translocase 2	P05141	ADT2_HUMAN	48529.1	53434.7	60615.8			dirDIA	P06493	P06493	CDK1	Cyclin-dependent kinase 1	P06493	CDK1_HUMAN	6372.82	10248.4	11817.7
libDIA	P05161	P05161	ISG15	Ubiquitin-like protein ISG15	P05161	ISG15_HUMAN	4668.45	Filtered	Filtered			dirDIA	P06576	P06576	ATP5B	ATP synthase subunit beta, mitochondrial	P06576	ATPB_HUMAN	105265	190338	91405.6
libDIA	P05198	P05198	EIF2S1	Eukaryotic translation initiation factor 2 subunit 1	P05198	IF2A_HUMAN	15097.8	20924.5	12301.6			dirDIA	P06702	P06702	S100A9	Protein S100-A9	P06702	S10A9_HUMAN	840.461	15656.2	Filtered
libDIA	P05387	P05387	RPLP2	60S acidic ribosomal protein P2	P05387	RLA2_HUMAN	56239.5	49260.9	62419.8			dirDIA	P06727	P06727	APOA4	Apolipoprotein A-IV	P06727	APOA4_HUMAN	2903.64	2276.65	4705.56
libDIA	P05388	P05388	RPLP0	60S acidic ribosomal protein P0	P05388	RLA0_HUMAN	21917	22085.2	25066.8			dirDIA	P06733	P06733	ENO1	Alpha-enolase	P06733	ENOA_HUMAN	160190	146174	158115
libDIA	P06454	P06454	PTMA	Prothymosin alpha	P06454	PTMA_HUMAN	6533.76	30247.1	Filtered			dirDIA	P06734	P06734	FCER2	Low affinity immunoglobulin epsilon Fc receptor	P06734	FCER2_HUMAN	6726.52	9797.51	5945.26
libDIA	P06493	P06493	CDK1	Cyclin-dependent kinase 1	P06493	CDK1_HUMAN	15706.8	12403.7	10924.2			dirDIA	P06744	P06744	GPI	Glucose-6-phosphate isomerase	P06744	G6PI_HUMAN	10279.8	7275.83	711.635
libDIA	P06576	P06576	ATP5B	ATP synthase subunit beta, mitochondrial	P06576	ATPB_HUMAN	177977	171895	152535			dirDIA	P06748	P06748	NPM1	Nucleophosmin	P06748	NPM_HUMAN	53700.7	34065.8	34340.9
libDIA	P06733	P06733	ENO1	Alpha-enolase	P06733	ENOA_HUMAN	89500.6	74375.4	62337			dirDIA	P06753	P06753	TPM3	Tropomyosin alpha-3 chain	P06753	TPM3_HUMAN	20329.4	23166.6	24014.1
libDIA	P06744	P06744	GPI	Glucose-6-phosphate isomerase	P06744	G6PI_HUMAN	11101.9	6924.44	Filtered			dirDIA	P06899;P23527;P33778;Q16778;Q8N257	P06899;P23527;P33778;Q16778;Q8N257	HIST1H2BJ;HIST1H2BO;HIST1H2BB;HIST2H2BE;HIST3H2BB	Histone H2B type 1-J;Histone H2B type 1-O;Histone H2B type 1-B;Histone H2B type 2-E;Histone H2B type 3-B	P06899;P23527;P33778;Q16778;Q8N257	H2B1J_HUMAN;H2B1O_HUMAN;H2B1B_HUMAN;H2B2E_HUMAN;H2B3B_HUMAN	657497	1.19398e+06	958258
libDIA	P06748	P06748	NPM1	Nucleophosmin	P06748	NPM_HUMAN	62629.8	29009.3	11713.5			dirDIA	P07195	P07195	LDHB	L-lactate dehydrogenase B chain	P07195	LDHB_HUMAN	182515	164770	161545
libDIA	P06753	P06753	TPM3	Tropomyosin alpha-3 chain	P06753	TPM3_HUMAN	38308.4	65384.6	58341.6			dirDIA	P07237	P07237	P4HB	Protein disulfide-isomerase	P07237	PDIA1_HUMAN	9214.86	6320.16	5986.93
libDIA	P06899;P23527;P33778;Q16778	P06899;P23527;P33778;Q16778	HIST1H2BJ;HIST1H2BO;HIST1H2BB;HIST2H2BE	Histone H2B type 1-J;Histone H2B type 1-O;Histone H2B type 1-B;Histone H2B type 2-E	P06899;P23527;P33778;Q16778	H2B1J_HUMAN;H2B1O_HUMAN;H2B1B_HUMAN;H2B2E_HUMAN	676060	1.23148e+06	995517			dirDIA	P07339	P07339	CTSD	Cathepsin D	P07339	CATD_HUMAN	3387.19	5044.39	10536.8
libDIA	P07195	P07195	LDHB	L-lactate dehydrogenase B chain	P07195	LDHB_HUMAN	179640	147939	165270			dirDIA	P07355	P07355	ANXA2	Annexin A2	P07355	ANXA2_HUMAN	12439.2	15562.2	18399.9
libDIA	P07203	P07203	GPX1	Glutathione peroxidase 1	P07203	GPX1_HUMAN	Filtered	Filtered	2992.37			dirDIA	P07437	P07437	TUBB	Tubulin beta chain	P07437	TBB5_HUMAN	145171	126212	124388
libDIA	P07237	P07237	P4HB	Protein disulfide-isomerase	P07237	PDIA1_HUMAN	14148.6	10777.6	7809.86			dirDIA	P07737	P07737	PFN1	Profilin-1	P07737	PROF1_HUMAN	94825.1	92423.6	86404
libDIA	P07339	P07339	CTSD	Cathepsin D	P07339	CATD_HUMAN	Filtered	Filtered	8355.82			dirDIA	P07741	P07741	APRT	Adenine phosphoribosyltransferase	P07741	APT_HUMAN	30117.6	50255.9	37082.5
libDIA	P07355	P07355	ANXA2	Annexin A2	P07355	ANXA2_HUMAN	11467.3	14263.8	17685.1			dirDIA	P07814	P07814	EPRS	Bifunctional glutamate/proline--tRNA ligase	P07814	SYEP_HUMAN	4848.17	4329.18	8592.34
libDIA	P07384	P07384	CAPN1	Calpain-1 catalytic subunit	P07384	CAN1_HUMAN	Filtered	6037.54	6859.75			dirDIA	P07900	P07900	HSP90AA1	Heat shock protein HSP 90-alpha	P07900	HS90A_HUMAN	59596.9	47282.6	51455.5
libDIA	P07437	P07437	TUBB	Tubulin beta chain	P07437	TBB5_HUMAN	163613	218362	239769			dirDIA	P07910	P07910	HNRNPC	Heterogeneous nuclear ribonucleoproteins C1/C2	P07910	HNRPC_HUMAN	57862.6	44585.3	48115
libDIA	P07737	P07737	PFN1	Profilin-1	P07737	PROF1_HUMAN	96343.5	91089.4	89528.9			dirDIA	P07954	P07954	FH	Fumarate hydratase, mitochondrial	P07954	FUMH_HUMAN	6642.88	8348.25	8362.39
libDIA	P07741	P07741	APRT	Adenine phosphoribosyltransferase	P07741	APT_HUMAN	36178.2	57202	44162.9			dirDIA	P08133	P08133	ANXA6	Annexin A6	P08133	ANXA6_HUMAN	40496.1	31978.6	44597.9
libDIA	P07814	P07814	EPRS	Bifunctional glutamate/proline--tRNA ligase	P07814	SYEP_HUMAN	Filtered	5098.82	7374.54			dirDIA	P08195	P08195	SLC3A2	4F2 cell-surface antigen heavy chain	P08195	4F2_HUMAN	4911.72	4246.49	8059.22
libDIA	P07900	P07900	HSP90AA1	Heat shock protein HSP 90-alpha	P07900	HS90A_HUMAN	70305.6	53662.6	58081.7			dirDIA	P08238	P08238	HSP90AB1	Heat shock protein HSP 90-beta	P08238	HS90B_HUMAN	451412	490869	359992
libDIA	P07910	P07910	HNRNPC	Heterogeneous nuclear ribonucleoproteins C1/C2	P07910	HNRPC_HUMAN	45975.8	42082.6	39331.7			dirDIA	P08243	P08243	ASNS	Asparagine synthetase [glutamine-hydrolyzing]	P08243	ASNS_HUMAN	12914.9	13254.3	11746.2
libDIA	P07951;P67936	P07951;P67936	TPM2;TPM4	Tropomyosin beta chain;Tropomyosin alpha-4 chain	P07951;P67936	TPM2_HUMAN;TPM4_HUMAN	25694	19490.5	16608			dirDIA	P08559	P08559	PDHA1	Pyruvate dehydrogenase E1 component subunit alpha, somatic form, mitochondrial	P08559	ODPA_HUMAN	4127.79	7296.33	9607.58
libDIA	P07954	P07954	FH	Fumarate hydratase, mitochondrial	P07954	FUMH_HUMAN	9360.53	12217.8	9171.69			dirDIA	P08575	P08575	PTPRC	Receptor-type tyrosine-protein phosphatase C	P08575	PTPRC_HUMAN	38295.7	77168.9	55007.6
libDIA	P08133	P08133	ANXA6	Annexin A6	P08133	ANXA6_HUMAN	46147.8	33162.7	54076.8			dirDIA	P08579;P09012	P08579;P09012	SNRPB2;SNRPA	U2 small nuclear ribonucleoprotein B'';U1 small nuclear ribonucleoprotein A	P08579;P09012	RU2B_HUMAN;SNRPA_HUMAN	4333.98	4344.78	5509.2
libDIA	P08195	P08195	SLC3A2	4F2 cell-surface antigen heavy chain	P08195	4F2_HUMAN	6829.76	8367.74	10933.3			dirDIA	P08621	P08621	SNRNP70	U1 small nuclear ribonucleoprotein 70 kDa	P08621	RU17_HUMAN	11566.7	8299.13	11586
libDIA	P08238	P08238	HSP90AB1	Heat shock protein HSP 90-beta	P08238	HS90B_HUMAN	456041	488679	372920			dirDIA	P08729	P08729	KRT7	Keratin, type II cytoskeletal 7	P08729	K2C7_HUMAN	16270.1	8416.29	5758.65
libDIA	P08243	P08243	ASNS	Asparagine synthetase [glutamine-hydrolyzing]	P08243	ASNS_HUMAN	13043.2	13222.7	12855.8			dirDIA	P08758	P08758	ANXA5	Annexin A5	P08758	ANXA5_HUMAN	8912.54	9752.93	9077.3
libDIA	P08559	P08559	PDHA1	Pyruvate dehydrogenase E1 component subunit alpha, somatic form, mitochondrial	P08559	ODPA_HUMAN	7575.74	13110.4	15948.5			dirDIA	P08779	P08779	KRT16	Keratin, type I cytoskeletal 16	P08779	K1C16_HUMAN	2463.15	17158.3	6031.61
libDIA	P08575	P08575	PTPRC	Receptor-type tyrosine-protein phosphatase C	P08575	PTPRC_HUMAN	Filtered	Filtered	3774.47			dirDIA	P08865	P08865	RPSA	40S ribosomal protein SA	P08865	RSSA_HUMAN	35178.3	27541	28543.8
libDIA	P08579	P08579	SNRPB2	U2 small nuclear ribonucleoprotein B''	P08579	RU2B_HUMAN	Filtered	4950.1	3680.74			dirDIA	P09211	P09211	GSTP1	Glutathione S-transferase P	P09211	GSTP1_HUMAN	14933.8	11221.3	17562.4
libDIA	P08621	P08621	SNRNP70	U1 small nuclear ribonucleoprotein 70 kDa	P08621	RU17_HUMAN	Filtered	8470.74	11819.1			dirDIA	P09326	P09326	CD48	CD48 antigen	P09326	CD48_HUMAN	6117.07	7430.08	5198.79
libDIA	P08758	P08758	ANXA5	Annexin A5	P08758	ANXA5_HUMAN	17166	21938.1	16216.1			dirDIA	P09382	P09382	LGALS1	Galectin-1	P09382	LEG1_HUMAN	54978.6	57741.7	46232
libDIA	P08779	P08779	KRT16	Keratin, type I cytoskeletal 16	P08779	K1C16_HUMAN	Filtered	8101.42	Filtered			dirDIA	P09429	P09429	HMGB1	High mobility group protein B1	P09429	HMGB1_HUMAN	12992.7	13652.3	12712.9
libDIA	P08865	P08865	RPSA	40S ribosomal protein SA	P08865	RSSA_HUMAN	48608.6	37358.6	29343.3			dirDIA	P09622	P09622	DLD	Dihydrolipoyl dehydrogenase, mitochondrial	P09622	DLDH_HUMAN	12019.1	9590.77	6204.94
libDIA	P09211	P09211	GSTP1	Glutathione S-transferase P	P09211	GSTP1_HUMAN	22976.4	32602.7	26809			dirDIA	P09651;Q32P51	P09651;Q32P51	HNRNPA1;HNRNPA1L2	Heterogeneous nuclear ribonucleoprotein A1;Heterogeneous nuclear ribonucleoprotein A1-like 2	P09651;Q32P51	ROA1_HUMAN;RA1L2_HUMAN	72108.7	75759.7	59529.2
libDIA	P09326	P09326	CD48	CD48 antigen	P09326	CD48_HUMAN	6899.36	8125.15	6083.82			dirDIA	P09661	P09661	SNRPA1	U2 small nuclear ribonucleoprotein A'	P09661	RU2A_HUMAN	14134.6	16375.1	15617.8
libDIA	P09382	P09382	LGALS1	Galectin-1	P09382	LEG1_HUMAN	55553.2	57867.9	48029.7			dirDIA	P09668	P09668	CTSH	Pro-cathepsin H	P09668	CATH_HUMAN	4457.48	4076.09	Filtered
libDIA	P09429	P09429	HMGB1	High mobility group protein B1	P09429	HMGB1_HUMAN	18635.3	13795.1	16914.5			dirDIA	P09669	P09669	COX6C	Cytochrome c oxidase subunit 6C	P09669	COX6C_HUMAN	14895.9	12307.8	10529.3
libDIA	P09622	P09622	DLD	Dihydrolipoyl dehydrogenase, mitochondrial	P09622	DLDH_HUMAN	12362	9826.97	7675.77			dirDIA	P09874	P09874	PARP1	Poly [ADP-ribose] polymerase 1	P09874	PARP1_HUMAN	22358.9	22457.4	14207
libDIA	P09651;Q32P51	P09651;Q32P51	HNRNPA1;HNRNPA1L2	Heterogeneous nuclear ribonucleoprotein A1;Heterogeneous nuclear ribonucleoprotein A1-like 2	P09651;Q32P51	ROA1_HUMAN;RA1L2_HUMAN	47599.5	43722.9	40775.7			dirDIA	P09972	P09972	ALDOC	Fructose-bisphosphate aldolase C	P09972	ALDOC_HUMAN	5325.54	5145.3	6821.54
libDIA	P09661	P09661	SNRPA1	U2 small nuclear ribonucleoprotein A'	P09661	RU2A_HUMAN	23051.3	23948.9	26006.1			dirDIA	P0C0S5;Q71UI9	P0C0S5;Q71UI9	H2AFZ;H2AFV	Histone H2A.Z;Histone H2A.V	P0C0S5;Q71UI9	H2AZ_HUMAN;H2AV_HUMAN	78030.5	129197	57030
libDIA	P09669	P09669	COX6C	Cytochrome c oxidase subunit 6C	P09669	COX6C_HUMAN	15094.5	12066.9	8932.15			dirDIA	P0C7P4;P47985	P0C7P4;P47985	UQCRFS1P1;UQCRFS1	Putative cytochrome b-c1 complex subunit Rieske-like protein 1;Cytochrome b-c1 complex subunit Rieske, mitochondrial	P0C7P4;P47985	UCRIL_HUMAN;UCRI_HUMAN	21343.6	20090.9	16779.6
libDIA	P09874	P09874	PARP1	Poly [ADP-ribose] polymerase 1	P09874	PARP1_HUMAN	25095.6	25075.4	19801.3			dirDIA	P0CG47;P0CG48;P62979;P62987	P0CG47;P0CG48;P62979;P62987	UBB;UBC;RPS27A;UBA52	Polyubiquitin-B;Polyubiquitin-C;Ubiquitin-40S ribosomal protein S27a;Ubiquitin-60S ribosomal protein L40	P0CG47;P0CG48;P62979;P62987	UBB_HUMAN;UBC_HUMAN;RS27A_HUMAN;RL40_HUMAN	125591	97653.4	136881
libDIA	P09972	P09972	ALDOC	Fructose-bisphosphate aldolase C	P09972	ALDOC_HUMAN	4719.09	4087.92	7454.51			dirDIA	P0DMV8;P0DMV9	P0DMV8;P0DMV9	HSPA1A;HSPA1B	Heat shock 70 kDa protein 1A;Heat shock 70 kDa protein 1B	P0DMV8;P0DMV9	HS71A_HUMAN;HS71B_HUMAN	6636.79	5867.59	9457.23
libDIA	P0C0S5;Q71UI9	P0C0S5;Q71UI9	H2AFZ;H2AFV	Histone H2A.Z;Histone H2A.V	P0C0S5;Q71UI9	H2AZ_HUMAN;H2AV_HUMAN	82332.4	133256	115363			dirDIA	P10412;P16402;P16403	P10412;P16402;P16403	HIST1H1E;HIST1H1D;HIST1H1C	Histone H1.4;Histone H1.3;Histone H1.2	P10412;P16402;P16403	H14_HUMAN;H13_HUMAN;H12_HUMAN	343120	373008	161401
libDIA	P0C7P4;P47985	P0C7P4;P47985	UQCRFS1P1;UQCRFS1	Putative cytochrome b-c1 complex subunit Rieske-like protein 1;Cytochrome b-c1 complex subunit Rieske, mitochondrial	P0C7P4;P47985	UCRIL_HUMAN;UCRI_HUMAN	29182.1	28261.2	16111.6			dirDIA	P10599	P10599	TXN	Thioredoxin	P10599	THIO_HUMAN	262967	314983	334091
libDIA	P0CG47;P0CG48;P62979;P62987	P0CG47;P0CG48;P62979;P62987	UBB;UBC;RPS27A;UBA52	Polyubiquitin-B;Polyubiquitin-C;Ubiquitin-40S ribosomal protein S27a;Ubiquitin-60S ribosomal protein L40	P0CG47;P0CG48;P62979;P62987	UBB_HUMAN;UBC_HUMAN;RS27A_HUMAN;RL40_HUMAN	132153	102245	136069			dirDIA	P10606	P10606	COX5B	Cytochrome c oxidase subunit 5B, mitochondrial	P10606	COX5B_HUMAN	2825.59	2613.11	5428.94
libDIA	P0DMV8;P0DMV9	P0DMV8;P0DMV9	HSPA1A;HSPA1B	Heat shock 70 kDa protein 1A;Heat shock 70 kDa protein 1B	P0DMV8;P0DMV9	HS71A_HUMAN;HS71B_HUMAN	Filtered	6864.19	8157.45			dirDIA	P10768	P10768	ESD	S-formylglutathione hydrolase	P10768	ESTD_HUMAN	6236.34	5377.31	4370.04
libDIA	P10412;P16402;P16403	P10412;P16402;P16403	HIST1H1E;HIST1H1D;HIST1H1C	Histone H1.4;Histone H1.3;Histone H1.2	P10412;P16402;P16403	H14_HUMAN;H13_HUMAN;H12_HUMAN	270087	329292	226677			dirDIA	P10809	P10809	HSPD1	60 kDa heat shock protein, mitochondrial	P10809	CH60_HUMAN	118671	119020	89532.4
libDIA	P10599	P10599	TXN	Thioredoxin	P10599	THIO_HUMAN	93424.9	163811	120993			dirDIA	P11021	P11021	HSPA5	78 kDa glucose-regulated protein	P11021	GRP78_HUMAN	42238.4	43174.6	54469.1
libDIA	P10606	P10606	COX5B	Cytochrome c oxidase subunit 5B, mitochondrial	P10606	COX5B_HUMAN	23416.2	Filtered	9569.81			dirDIA	P11142	P11142	HSPA8	Heat shock cognate 71 kDa protein	P11142	HSP7C_HUMAN	170670	174200	193544
libDIA	P10809	P10809	HSPD1	60 kDa heat shock protein, mitochondrial	P10809	CH60_HUMAN	120153	118710	92949.8			dirDIA	P11226	P11226	MBL2	Mannose-binding protein C	P11226	MBL2_HUMAN	33884	50543.3	58768.3
libDIA	P11021	P11021	HSPA5	78 kDa glucose-regulated protein	P11021	GRP78_HUMAN	32351.2	34619.7	57748			dirDIA	P11279	P11279	LAMP1	Lysosome-associated membrane glycoprotein 1	P11279	LAMP1_HUMAN	31625.4	23963.4	19196.6
libDIA	P11142	P11142	HSPA8	Heat shock cognate 71 kDa protein	P11142	HSP7C_HUMAN	117251	97069.9	126501			dirDIA	P11310	P11310	ACADM	Medium-chain specific acyl-CoA dehydrogenase, mitochondrial	P11310	ACADM_HUMAN	5687.54	6463.78	5956.07
libDIA	P11177	P11177	PDHB	Pyruvate dehydrogenase E1 component subunit beta, mitochondrial	P11177	ODPB_HUMAN	Filtered	Filtered	6735.27			dirDIA	P11387	P11387	TOP1	DNA topoisomerase 1	P11387	TOP1_HUMAN	5711.87	6061.18	3693.55
libDIA	P11279	P11279	LAMP1	Lysosome-associated membrane glycoprotein 1	P11279	LAMP1_HUMAN	33770.2	26219.6	21784.3			dirDIA	P11388	P11388	TOP2A	DNA topoisomerase 2-alpha	P11388	TOP2A_HUMAN	8357.04	11401.9	14721.2
libDIA	P11310	P11310	ACADM	Medium-chain specific acyl-CoA dehydrogenase, mitochondrial	P11310	ACADM_HUMAN	4792.68	5973.84	5472.93			dirDIA	P11413	P11413	G6PD	Glucose-6-phosphate 1-dehydrogenase	P11413	G6PD_HUMAN	8940.7	11760.3	9209.71
libDIA	P11387	P11387	TOP1	DNA topoisomerase 1	P11387	TOP1_HUMAN	12955.2	233448	12610.6			dirDIA	P11586	P11586	MTHFD1	C-1-tetrahydrofolate synthase, cytoplasmic	P11586	C1TC_HUMAN	43235.6	48162.6	36500.8
libDIA	P11388	P11388	TOP2A	DNA topoisomerase 2-alpha	P11388	TOP2A_HUMAN	12335.1	15443.8	16808.1			dirDIA	P11766	P11766	ADH5	Alcohol dehydrogenase class-3	P11766	ADHX_HUMAN	5417.96	4622.22	3544.28
libDIA	P11586	P11586	MTHFD1	C-1-tetrahydrofolate synthase, cytoplasmic	P11586	C1TC_HUMAN	44093.5	48731.3	38140.5			dirDIA	P11836	P11836	MS4A1	B-lymphocyte antigen CD20	P11836	CD20_HUMAN	10032.5	8867.07	2888.14
libDIA	P11766	P11766	ADH5	Alcohol dehydrogenase class-3	P11766	ADHX_HUMAN	Filtered	8408.36	5881.38			dirDIA	P11940	P11940	PABPC1	Polyadenylate-binding protein 1	P11940	PABP1_HUMAN	20220.5	14567.4	26777.2
libDIA	P11836	P11836	MS4A1	B-lymphocyte antigen CD20	P11836	CD20_HUMAN	13409.3	11611.7	5421.76			dirDIA	P12004	P12004	PCNA	Proliferating cell nuclear antigen	P12004	PCNA_HUMAN	15310.9	16651.9	15383.8
libDIA	P11940	P11940	PABPC1	Polyadenylate-binding protein 1	P11940	PABP1_HUMAN	20352	17130.2	26157.1			dirDIA	P12236	P12236	SLC25A6	ADP/ATP translocase 3	P12236	ADT3_HUMAN	41402.8	48883.4	32469.3
libDIA	P12004	P12004	PCNA	Proliferating cell nuclear antigen	P12004	PCNA_HUMAN	20610.7	23994.9	17191.9			dirDIA	P12268	P12268	IMPDH2	Inosine-5'-monophosphate dehydrogenase 2	P12268	IMDH2_HUMAN	16532.8	10256.6	17916.6
libDIA	P12081	P12081	HARS	Histidine--tRNA ligase, cytoplasmic	P12081	SYHC_HUMAN	Filtered	10199.8	7485.16			dirDIA	P12270	P12270	TPR	Nucleoprotein TPR	P12270	TPR_HUMAN	489.021	1898.7	1669.57
libDIA	P12236	P12236	SLC25A6	ADP/ATP translocase 3	P12236	ADT3_HUMAN	39798.3	44744.7	33043.6			dirDIA	P12956	P12956	XRCC6	X-ray repair cross-complementing protein 6	P12956	XRCC6_HUMAN	39623.3	44158	47233.2
libDIA	P12268	P12268	IMPDH2	Inosine-5'-monophosphate dehydrogenase 2	P12268	IMDH2_HUMAN	36914.4	28781.7	32676.6			dirDIA	P13010	P13010	XRCC5	X-ray repair cross-complementing protein 5	P13010	XRCC5_HUMAN	25468.3	25134.8	27707.4
libDIA	P12270	P12270	TPR	Nucleoprotein TPR	P12270	TPR_HUMAN	Filtered	Filtered	2963.84			dirDIA	P13073	P13073	COX4I1	Cytochrome c oxidase subunit 4 isoform 1, mitochondrial	P13073	COX41_HUMAN	40154.2	35000	23667.9
libDIA	P12273	P12273	PIP	Prolactin-inducible protein	P12273	PIP_HUMAN	Filtered	Filtered	2702.33			dirDIA	P13489	P13489	RNH1	Ribonuclease inhibitor	P13489	RINI_HUMAN	6608.52	9887.87	11090.6
libDIA	P12956	P12956	XRCC6	X-ray repair cross-complementing protein 6	P12956	XRCC6_HUMAN	24087.2	22439.9	29494.8			dirDIA	P13639	P13639	EEF2	Elongation factor 2	P13639	EF2_HUMAN	166227	189644	152034
libDIA	P13010	P13010	XRCC5	X-ray repair cross-complementing protein 5	P13010	XRCC5_HUMAN	26067.3	25960.3	28876.5			dirDIA	P13645	P13645	KRT10	Keratin, type I cytoskeletal 10	P13645	K1C10_HUMAN	1.09412e+06	564450	1.9264e+06
libDIA	P13073	P13073	COX4I1	Cytochrome c oxidase subunit 4 isoform 1, mitochondrial	P13073	COX41_HUMAN	40649.3	34943.3	18528.5			dirDIA	P13647	P13647	KRT5	Keratin, type II cytoskeletal 5	P13647	K2C5_HUMAN	57455.5	77896	262625
libDIA	P13489	P13489	RNH1	Ribonuclease inhibitor	P13489	RINI_HUMAN	8579.8	10723.1	12287.5			dirDIA	P13667	P13667	PDIA4	Protein disulfide-isomerase A4	P13667	PDIA4_HUMAN	19758.3	16066.8	12599
libDIA	P13639	P13639	EEF2	Elongation factor 2	P13639	EF2_HUMAN	168120	189218	157788			dirDIA	P13796	P13796	LCP1	Plastin-2	P13796	PLSL_HUMAN	127784	118929	120918
libDIA	P13645	P13645	KRT10	Keratin, type I cytoskeletal 10	P13645	K1C10_HUMAN	1.25869e+06	658022	2.13593e+06			dirDIA	P13798	P13798	APEH	Acylamino-acid-releasing enzyme	P13798	ACPH_HUMAN	6201.03	7978.61	6309.18
libDIA	P13647	P13647	KRT5	Keratin, type II cytoskeletal 5	P13647	K2C5_HUMAN	112601	60442.5	199191			dirDIA	P13804	P13804	ETFA	Electron transfer flavoprotein subunit alpha, mitochondrial	P13804	ETFA_HUMAN	5437.18	1662.98	2124.56
libDIA	P13667	P13667	PDIA4	Protein disulfide-isomerase A4	P13667	PDIA4_HUMAN	16997.4	13843.6	13148.6			dirDIA	P13995	P13995	MTHFD2	Bifunctional methylenetetrahydrofolate dehydrogenase/cyclohydrolase, mitochondrial	P13995	MTDC_HUMAN	6990.96	12204.3	8393.72
libDIA	P13796	P13796	LCP1	Plastin-2	P13796	PLSL_HUMAN	132122	121972	107930			dirDIA	P14314	P14314	PRKCSH	Glucosidase 2 subunit beta	P14314	GLU2B_HUMAN	4052.2	3903.8	3142.6
libDIA	P13798	P13798	APEH	Acylamino-acid-releasing enzyme	P13798	ACPH_HUMAN	8872.66	8829.05	7211.68			dirDIA	P14317	P14317	HCLS1	Hematopoietic lineage cell-specific protein	P14317	HCLS1_HUMAN	4789.35	4250.12	Filtered
libDIA	P13995	P13995	MTHFD2	Bifunctional methylenetetrahydrofolate dehydrogenase/cyclohydrolase, mitochondrial	P13995	MTDC_HUMAN	Filtered	13789.4	11828.8			dirDIA	P14324	P14324	FDPS	Farnesyl pyrophosphate synthase	P14324	FPPS_HUMAN	11597.2	11604.4	7703.94
libDIA	P14314	P14314	PRKCSH	Glucosidase 2 subunit beta	P14314	GLU2B_HUMAN	5054.51	5108.06	3261.13			dirDIA	P14406	P14406	COX7A2	Cytochrome c oxidase subunit 7A2, mitochondrial	P14406	CX7A2_HUMAN	14451.5	26061.9	22049.5
libDIA	P14317	P14317	HCLS1	Hematopoietic lineage cell-specific protein	P14317	HCLS1_HUMAN	Filtered	Filtered	2184.33			dirDIA	P14550	P14550	AKR1A1	Alcohol dehydrogenase [NADP(+)]	P14550	AK1A1_HUMAN	5399.84	10915.3	10946.6
libDIA	P14324	P14324	FDPS	Farnesyl pyrophosphate synthase	P14324	FPPS_HUMAN	10347.8	9742.79	6461.02			dirDIA	P14618	P14618	PKM	Pyruvate kinase PKM	P14618	KPYM_HUMAN	227913	284252	195362
libDIA	P14406	P14406	COX7A2	Cytochrome c oxidase subunit 7A2, mitochondrial	P14406	CX7A2_HUMAN	14758.1	26184.4	23073.5			dirDIA	P14625	P14625	HSP90B1	Endoplasmin	P14625	ENPL_HUMAN	63909.8	62317.9	83404.3
libDIA	P14550	P14550	AKR1A1	Alcohol dehydrogenase [NADP(+)]	P14550	AK1A1_HUMAN	7897.03	11390.9	10430			dirDIA	P14678;P63162	P14678;P63162	SNRPB;SNRPN	Small nuclear ribonucleoprotein-associated proteins B and B';Small nuclear ribonucleoprotein-associated protein N	P14678;P63162	RSMB_HUMAN;RSMN_HUMAN	10212.6	12324.3	9019.87
libDIA	P14618	P14618	PKM	Pyruvate kinase PKM	P14618	KPYM_HUMAN	230245	283103	202406			dirDIA	P14866	P14866	HNRNPL	Heterogeneous nuclear ribonucleoprotein L	P14866	HNRPL_HUMAN	11524.7	12325.6	16721.7
libDIA	P14625	P14625	HSP90B1	Endoplasmin	P14625	ENPL_HUMAN	54626.7	51684.6	65218.2			dirDIA	P14868	P14868	DARS	Aspartate--tRNA ligase, cytoplasmic	P14868	SYDC_HUMAN	7894.96	11731.2	15436.2
libDIA	P14678;P63162	P14678;P63162	SNRPB;SNRPN	Small nuclear ribonucleoprotein-associated proteins B and B';Small nuclear ribonucleoprotein-associated protein N	P14678;P63162	RSMB_HUMAN;RSMN_HUMAN	11675.2	12327	9155.81			dirDIA	P14923	P14923	JUP	Junction plakoglobin	P14923	PLAK_HUMAN	1	Filtered	8702.03
libDIA	P14866	P14866	HNRNPL	Heterogeneous nuclear ribonucleoprotein L	P14866	HNRPL_HUMAN	24509.6	23916.1	9696.76			dirDIA	P15121	P15121	AKR1B1	Aldose reductase	P15121	ALDR_HUMAN	19014.2	16638.8	11281.7
libDIA	P14868	P14868	DARS	Aspartate--tRNA ligase, cytoplasmic	P14868	SYDC_HUMAN	14802.4	12984.7	15568.7			dirDIA	P15153	P15153	RAC2	Ras-related C3 botulinum toxin substrate 2	P15153	RAC2_HUMAN	44036.7	43736.7	37397.8
libDIA	P15121	P15121	AKR1B1	Aldose reductase	P15121	ALDR_HUMAN	18311.2	25920.5	7670.78			dirDIA	P15259;P18669	P15259;P18669	PGAM2;PGAM1	Phosphoglycerate mutase 2;Phosphoglycerate mutase 1	P15259;P18669	PGAM2_HUMAN;PGAM1_HUMAN	17239	15186.5	23223.5
libDIA	P15153	P15153	RAC2	Ras-related C3 botulinum toxin substrate 2	P15153	RAC2_HUMAN	14369.9	Filtered	18499			dirDIA	P15311	P15311	EZR	Ezrin	P15311	EZRI_HUMAN	8702.89	7626.02	14114.7
libDIA	P15259;P18669	P15259;P18669	PGAM2;PGAM1	Phosphoglycerate mutase 2;Phosphoglycerate mutase 1	P15259;P18669	PGAM2_HUMAN;PGAM1_HUMAN	18271	11158	15562.7			dirDIA	P15531	P15531	NME1	Nucleoside diphosphate kinase A	P15531	NDKA_HUMAN	64872.5	56816.3	50757
libDIA	P15311	P15311	EZR	Ezrin	P15311	EZRI_HUMAN	24627.5	20946	30743.5			dirDIA	P15880	P15880	RPS2	40S ribosomal protein S2	P15880	RS2_HUMAN	33490.5	29384.3	26527.8
libDIA	P15531	P15531	NME1	Nucleoside diphosphate kinase A	P15531	NDKA_HUMAN	65351.4	52114.5	62882.3			dirDIA	P15924	P15924	DSP	Desmoplakin	P15924	DESP_HUMAN	105.294	6625.83	35173
libDIA	P15880	P15880	RPS2	40S ribosomal protein S2	P15880	RS2_HUMAN	61509.8	54026.3	18953.2			dirDIA	P16220	P16220	CREB1	Cyclic AMP-responsive element-binding protein 1	P16220	CREB1_HUMAN	Filtered	1841.76	2606.5
libDIA	P16220	P16220	CREB1	Cyclic AMP-responsive element-binding protein 1	P16220	CREB1_HUMAN	Filtered	Filtered	3164.15			dirDIA	P16401	P16401	HIST1H1B	Histone H1.5	P16401	H15_HUMAN	227333	266496	178723
libDIA	P16401	P16401	HIST1H1B	Histone H1.5	P16401	H15_HUMAN	278906	301742	183044			dirDIA	P16949	P16949	STMN1	Stathmin	P16949	STMN1_HUMAN	66702.6	60843.6	55417.8
libDIA	P16435	P16435	POR	NADPH--cytochrome P450 reductase	P16435	NCPR_HUMAN	Filtered	Filtered	3574.27			dirDIA	P16989;P67809;Q9Y2T7	P16989;P67809;Q9Y2T7	YBX3;YBX1;YBX2	Y-box-binding protein 3;Nuclease-sensitive element-binding protein 1;Y-box-binding protein 2	P16989;P67809;Q9Y2T7	YBOX3_HUMAN;YBOX1_HUMAN;YBOX2_HUMAN	7642.55	8058.69	9091.34
libDIA	P16615	P16615	ATP2A2	Sarcoplasmic/endoplasmic reticulum calcium ATPase 2	P16615	AT2A2_HUMAN	Filtered	Filtered	3877.94			dirDIA	P17096	P17096	HMGA1	High mobility group protein HMG-I/HMG-Y	P17096	HMGA1_HUMAN	13226	12414.2	1974.43
libDIA	P16885	P16885	PLCG2	1-phosphatidylinositol 4,5-bisphosphate phosphodiesterase gamma-2	P16885	PLCG2_HUMAN	Filtered	6601.94	2793.88			dirDIA	P17174	P17174	GOT1	Aspartate aminotransferase, cytoplasmic	P17174	AATC_HUMAN	13428	12338.8	8064.13
libDIA	P16949	P16949	STMN1	Stathmin	P16949	STMN1_HUMAN	66224.9	60607.7	56661.9			dirDIA	P17844	P17844	DDX5	Probable ATP-dependent RNA helicase DDX5	P17844	DDX5_HUMAN	23197.7	27969.3	18735.8
libDIA	P16989;P67809;Q9Y2T7	P16989;P67809;Q9Y2T7	YBX3;YBX1;YBX2	Y-box-binding protein 3;Nuclease-sensitive element-binding protein 1;Y-box-binding protein 2	P16989;P67809;Q9Y2T7	YBOX3_HUMAN;YBOX1_HUMAN;YBOX2_HUMAN	9735.52	8328.5	9917.83			dirDIA	P17980	P17980	PSMC3	26S protease regulatory subunit 6A	P17980	PRS6A_HUMAN	12842.9	9666.68	15031.8
libDIA	P17174	P17174	GOT1	Aspartate aminotransferase, cytoplasmic	P17174	AATC_HUMAN	15636.2	11343.4	11162.8			dirDIA	P17987	P17987	TCP1	T-complex protein 1 subunit alpha	P17987	TCPA_HUMAN	9802.1	10778.2	11746.8
libDIA	P17844	P17844	DDX5	Probable ATP-dependent RNA helicase DDX5	P17844	DDX5_HUMAN	30898	36814.6	28843.8			dirDIA	P18077	P18077	RPL35A	60S ribosomal protein L35a	P18077	RL35A_HUMAN	45804.8	45817.2	31068.3
libDIA	P17931	P17931	LGALS3	Galectin-3	P17931	LEG3_HUMAN	16487.8	18352.3	15699.3			dirDIA	P18085	P18085	ARF4	ADP-ribosylation factor 4	P18085	ARF4_HUMAN	6070.97	4181.36	Filtered
libDIA	P17980	P17980	PSMC3	26S protease regulatory subunit 6A	P17980	PRS6A_HUMAN	13500.4	9645.01	15287.1			dirDIA	P18124	P18124	RPL7	60S ribosomal protein L7	P18124	RL7_HUMAN	60334.4	68109.9	56779.8
libDIA	P17987	P17987	TCP1	T-complex protein 1 subunit alpha	P17987	TCPA_HUMAN	19980.7	22116.6	16147			dirDIA	P18621	P18621	RPL17	60S ribosomal protein L17	P18621	RL17_HUMAN	36863.5	40257.8	38090.4
libDIA	P18031	P18031	PTPN1	Tyrosine-protein phosphatase non-receptor type 1	P18031	PTN1_HUMAN	Filtered	Filtered	4441.51			dirDIA	P18754	P18754	RCC1	Regulator of chromosome condensation	P18754	RCC1_HUMAN	15195.5	13826	20238.1
libDIA	P18077	P18077	RPL35A	60S ribosomal protein L35a	P18077	RL35A_HUMAN	46278.7	45716.3	32195.9			dirDIA	P18859	P18859	ATP5J	ATP synthase-coupling factor 6, mitochondrial	P18859	ATP5J_HUMAN	20789.7	18204.1	13333.3
libDIA	P18124	P18124	RPL7	60S ribosomal protein L7	P18124	RL7_HUMAN	52404.6	57012.6	50495.1			dirDIA	P19256	P19256	CD58	Lymphocyte function-associated antigen 3	P19256	LFA3_HUMAN	3366.59	2099.42	2805.26
libDIA	P18583	P18583	SON	Protein SON	P18583	SON_HUMAN	Filtered	Filtered	3966.94			dirDIA	P19338	P19338	NCL	Nucleolin	P19338	NUCL_HUMAN	197995	170556	126993
libDIA	P18621	P18621	RPL17	60S ribosomal protein L17	P18621	RL17_HUMAN	41929	45184.8	22719.4			dirDIA	P19525	P19525	EIF2AK2	Interferon-induced, double-stranded RNA-activated protein kinase	P19525	E2AK2_HUMAN	1	1	2254.92
libDIA	P18754	P18754	RCC1	Regulator of chromosome condensation	P18754	RCC1_HUMAN	28341.6	14171.6	18730.4			dirDIA	P19623	P19623	SRM	Spermidine synthase	P19623	SPEE_HUMAN	14750.5	11003.3	21983.8
libDIA	P18859	P18859	ATP5J	ATP synthase-coupling factor 6, mitochondrial	P18859	ATP5J_HUMAN	21772.7	18361.9	8403.6			dirDIA	P19823	P19823	ITIH2	Inter-alpha-trypsin inhibitor heavy chain H2	P19823	ITIH2_HUMAN	8688.9	15372.5	7901.05
libDIA	P19174	P19174	PLCG1	1-phosphatidylinositol 4,5-bisphosphate phosphodiesterase gamma-1	P19174	PLCG1_HUMAN	Filtered	Filtered	208517			dirDIA	P20042	P20042	EIF2S2	Eukaryotic translation initiation factor 2 subunit 2	P20042	IF2B_HUMAN	4848.29	5561.56	7345.91
libDIA	P19256	P19256	CD58	Lymphocyte function-associated antigen 3	P19256	LFA3_HUMAN	4264.25	3312	4256.38			dirDIA	P20290	P20290	BTF3	Transcription factor BTF3	P20290	BTF3_HUMAN	16593.2	13617.2	17477.7
libDIA	P19338	P19338	NCL	Nucleolin	P19338	NUCL_HUMAN	217178	181308	145053			dirDIA	P20339;P51148;P61020	P20339;P51148;P61020	RAB5A;RAB5C;RAB5B	Ras-related protein Rab-5A;Ras-related protein Rab-5C;Ras-related protein Rab-5B	P20339;P51148;P61020	RAB5A_HUMAN;RAB5C_HUMAN;RAB5B_HUMAN	8616.27	14438.2	13787
libDIA	P19525	P19525	EIF2AK2	Interferon-induced, double-stranded RNA-activated protein kinase	P19525	E2AK2_HUMAN	Filtered	Filtered	2429.44			dirDIA	P20591	P20591	MX1	Interferon-induced GTP-binding protein Mx1	P20591	MX1_HUMAN	6691.87	10075.1	7730.24
libDIA	P19623	P19623	SRM	Spermidine synthase	P19623	SPEE_HUMAN	15315	11156.2	12739.5			dirDIA	P20618	P20618	PSMB1	Proteasome subunit beta type-1	P20618	PSB1_HUMAN	24879.4	28483.8	30181.9
libDIA	P19823	P19823	ITIH2	Inter-alpha-trypsin inhibitor heavy chain H2	P19823	ITIH2_HUMAN	14242.8	19679.2	11286.8			dirDIA	P20674	P20674	COX5A	Cytochrome c oxidase subunit 5A, mitochondrial	P20674	COX5A_HUMAN	17201.3	15927.3	8676.62
libDIA	P20042	P20042	EIF2S2	Eukaryotic translation initiation factor 2 subunit 2	P20042	IF2B_HUMAN	Filtered	6824.03	8576.99			dirDIA	P20700	P20700	LMNB1	Lamin-B1	P20700	LMNB1_HUMAN	15111.5	15507.1	15568.5
libDIA	P20073	P20073	ANXA7	Annexin A7	P20073	ANXA7_HUMAN	Filtered	Filtered	7186.38			dirDIA	P21796	P21796	VDAC1	Voltage-dependent anion-selective channel protein 1	P21796	VDAC1_HUMAN	20598.5	26382.5	23288.9
libDIA	P20290	P20290	BTF3	Transcription factor BTF3	P20290	BTF3_HUMAN	11536.4	10261.8	12997.2			dirDIA	P22087	P22087	FBL	rRNA 2'-O-methyltransferase fibrillarin	P22087	FBRL_HUMAN	5956.69	7580.27	Filtered
libDIA	P20292	P20292	ALOX5AP	Arachidonate 5-lipoxygenase-activating protein	P20292	AL5AP_HUMAN	Filtered	Filtered	8570.96			dirDIA	P22102	P22102	GART	Trifunctional purine biosynthetic protein adenosine-3	P22102	PUR2_HUMAN	21103	22341	20949.3
libDIA	P20591	P20591	MX1	Interferon-induced GTP-binding protein Mx1	P20591	MX1_HUMAN	6068.49	9618.46	6444.86			dirDIA	P22234	P22234	PAICS	Multifunctional protein ADE2	P22234	PUR6_HUMAN	33244.2	32480.5	24167.9
libDIA	P20618	P20618	PSMB1	Proteasome subunit beta type-1	P20618	PSB1_HUMAN	26860.2	29524.5	22841.3			dirDIA	P22314	P22314	UBA1	Ubiquitin-like modifier-activating enzyme 1	P22314	UBA1_HUMAN	9918.3	8071.47	5243.9
libDIA	P20674	P20674	COX5A	Cytochrome c oxidase subunit 5A, mitochondrial	P20674	COX5A_HUMAN	17476.3	16017.9	11301.9			dirDIA	P22626	P22626	HNRNPA2B1	Heterogeneous nuclear ribonucleoproteins A2/B1	P22626	ROA2_HUMAN	295078	284639	281060
libDIA	P20700	P20700	LMNB1	Lamin-B1	P20700	LMNB1_HUMAN	20591.5	20195.7	17031.1			dirDIA	P22735	P22735	TGM1	Protein-glutamine gamma-glutamyltransferase K	P22735	TGM1_HUMAN	2351.56	1305.38	7142.34
libDIA	P21281	P21281	ATP6V1B2	V-type proton ATPase subunit B, brain isoform	P21281	VATB2_HUMAN	Filtered	Filtered	1849.27			dirDIA	P23193	P23193	TCEA1	Transcription elongation factor A protein 1	P23193	TCEA1_HUMAN	11911.6	11197.3	8652.17
libDIA	P21333	P21333	FLNA	Filamin-A	P21333	FLNA_HUMAN	8878.57	6180.09	2123.95			dirDIA	P23246	P23246	SFPQ	Splicing factor, proline- and glutamine-rich	P23246	SFPQ_HUMAN	10703.7	13357.9	8142.45
libDIA	P21796	P21796	VDAC1	Voltage-dependent anion-selective channel protein 1	P21796	VDAC1_HUMAN	25093.9	30618.3	27482			dirDIA	P23284	P23284	PPIB	Peptidyl-prolyl cis-trans isomerase B	P23284	PPIB_HUMAN	36524.4	36030.2	45762.2
libDIA	P22087	P22087	FBL	rRNA 2'-O-methyltransferase fibrillarin	P22087	FBRL_HUMAN	17102.4	17319.1	23017.2			dirDIA	P23368	P23368	ME2	NAD-dependent malic enzyme, mitochondrial	P23368	MAOM_HUMAN	7092.52	7072.2	6034.4
libDIA	P22102	P22102	GART	Trifunctional purine biosynthetic protein adenosine-3	P22102	PUR2_HUMAN	23641.7	20643.3	20958.4			dirDIA	P23396	P23396	RPS3	40S ribosomal protein S3	P23396	RS3_HUMAN	82504.6	132193	110630
libDIA	P22234	P22234	PAICS	Multifunctional protein ADE2	P22234	PUR6_HUMAN	31028.6	31440.7	26896.4			dirDIA	P23526	P23526	AHCY	Adenosylhomocysteinase	P23526	SAHH_HUMAN	37016.3	31721.5	29488.8
libDIA	P22314	P22314	UBA1	Ubiquitin-like modifier-activating enzyme 1	P22314	UBA1_HUMAN	8234.6	6111.01	4107.24			dirDIA	P23528	P23528	CFL1	Cofilin-1	P23528	COF1_HUMAN	78878.6	63735.6	50959
libDIA	P22626	P22626	HNRNPA2B1	Heterogeneous nuclear ribonucleoproteins A2/B1	P22626	ROA2_HUMAN	257101	247006	248712			dirDIA	P23919	P23919	DTYMK	Thymidylate kinase	P23919	KTHY_HUMAN	38518.3	43152.3	47893.7
libDIA	P23193	P23193	TCEA1	Transcription elongation factor A protein 1	P23193	TCEA1_HUMAN	23546.5	20123.2	9987.29			dirDIA	P23921	P23921	RRM1	Ribonucleoside-diphosphate reductase large subunit	P23921	RIR1_HUMAN	6122.44	8166.13	9190.84
libDIA	P23246	P23246	SFPQ	Splicing factor, proline- and glutamine-rich	P23246	SFPQ_HUMAN	20253.1	14068.8	7986.46			dirDIA	P24534	P24534	EEF1B2	Elongation factor 1-beta	P24534	EF1B_HUMAN	59040.1	64152.6	51181.1
libDIA	P23258;Q9NRH3	P23258;Q9NRH3	TUBG1;TUBG2	Tubulin gamma-1 chain;Tubulin gamma-2 chain	P23258;Q9NRH3	TBG1_HUMAN;TBG2_HUMAN	Filtered	Filtered	5386.38			dirDIA	P24539	P24539	ATP5F1	ATP synthase F(0) complex subunit B1, mitochondrial	P24539	AT5F1_HUMAN	7526.66	4219.47	13292.7
libDIA	P23284	P23284	PPIB	Peptidyl-prolyl cis-trans isomerase B	P23284	PPIB_HUMAN	24968.2	21584.2	29167.7			dirDIA	P24666	P24666	ACP1	Low molecular weight phosphotyrosine protein phosphatase	P24666	PPAC_HUMAN	13476.3	18545.6	17448.6
libDIA	P23368	P23368	ME2	NAD-dependent malic enzyme, mitochondrial	P23368	MAOM_HUMAN	7553.77	7605.99	5340.62			dirDIA	P24752	P24752	ACAT1	Acetyl-CoA acetyltransferase, mitochondrial	P24752	THIL_HUMAN	8522.48	7625.84	6152.99
libDIA	P23396	P23396	RPS3	40S ribosomal protein S3	P23396	RS3_HUMAN	65727.8	98842.9	90774.1			dirDIA	P25205	P25205	MCM3	DNA replication licensing factor MCM3	P25205	MCM3_HUMAN	9780.81	12572.6	14154.5
libDIA	P23526	P23526	AHCY	Adenosylhomocysteinase	P23526	SAHH_HUMAN	45465.3	39845	29500.1			dirDIA	P25398	P25398	RPS12	40S ribosomal protein S12	P25398	RS12_HUMAN	18708.4	17558	36144.7
libDIA	P23528	P23528	CFL1	Cofilin-1	P23528	COF1_HUMAN	81625.6	72684	50978.8			dirDIA	P25705	P25705	ATP5A1	ATP synthase subunit alpha, mitochondrial	P25705	ATPA_HUMAN	185701	183401	128371
libDIA	P23921	P23921	RRM1	Ribonucleoside-diphosphate reductase large subunit	P23921	RIR1_HUMAN	4461.68	4911.06	6302.63			dirDIA	P25786	P25786	PSMA1	Proteasome subunit alpha type-1	P25786	PSA1_HUMAN	20417.7	17464	11281.7
libDIA	P24386;P26374	P24386;P26374	CHM;CHML	Rab proteins geranylgeranyltransferase component A 1;Rab proteins geranylgeranyltransferase component A 2	P24386;P26374	RAE1_HUMAN;RAE2_HUMAN	385828	Filtered	Filtered			dirDIA	P25788	P25788	PSMA3	Proteasome subunit alpha type-3	P25788	PSA3_HUMAN	6269.37	6269.48	1459.61
libDIA	P24534	P24534	EEF1B2	Elongation factor 1-beta	P24534	EF1B_HUMAN	135943	74964.9	59330.3			dirDIA	P25789	P25789	PSMA4	Proteasome subunit alpha type-4	P25789	PSA4_HUMAN	28947.7	24001.8	27019.9
libDIA	P24539	P24539	ATP5F1	ATP synthase F(0) complex subunit B1, mitochondrial	P24539	AT5F1_HUMAN	Filtered	Filtered	13511.8			dirDIA	P26038	P26038	MSN	Moesin	P26038	MOES_HUMAN	39910.5	35511.9	29448.7
libDIA	P24666	P24666	ACP1	Low molecular weight phosphotyrosine protein phosphatase	P24666	PPAC_HUMAN	24661.3	20929.6	20118.5			dirDIA	P26196	P26196	DDX6	Probable ATP-dependent RNA helicase DDX6	P26196	DDX6_HUMAN	362.797	667.316	4714.44
libDIA	P24752	P24752	ACAT1	Acetyl-CoA acetyltransferase, mitochondrial	P24752	THIL_HUMAN	6108.48	5205.24	5771.39			dirDIA	P26358	P26358	DNMT1	DNA (cytosine-5)-methyltransferase 1	P26358	DNMT1_HUMAN	6390.08	7480.25	5313.61
libDIA	P25205	P25205	MCM3	DNA replication licensing factor MCM3	P25205	MCM3_HUMAN	10030.4	14242.8	29309.2			dirDIA	P26368	P26368	U2AF2	Splicing factor U2AF 65 kDa subunit	P26368	U2AF2_HUMAN	6950.74	4084.63	10551.7
libDIA	P25398	P25398	RPS12	40S ribosomal protein S12	P25398	RS12_HUMAN	21563.3	19763.3	28852.5			dirDIA	P26373	P26373	RPL13	60S ribosomal protein L13	P26373	RL13_HUMAN	19469.4	26434.4	41891.3
libDIA	P25705	P25705	ATP5A1	ATP synthase subunit alpha, mitochondrial	P25705	ATPA_HUMAN	187942	182679	133333			dirDIA	P26583	P26583	HMGB2	High mobility group protein B2	P26583	HMGB2_HUMAN	18514.2	15446.8	7430.05
libDIA	P25786	P25786	PSMA1	Proteasome subunit alpha type-1	P25786	PSA1_HUMAN	18904.7	15493.6	13870			dirDIA	P26599	P26599	PTBP1	Polypyrimidine tract-binding protein 1	P26599	PTBP1_HUMAN	19649.3	17897.4	16529.3
libDIA	P25787	P25787	PSMA2	Proteasome subunit alpha type-2	P25787	PSA2_HUMAN	9522.98	7908.24	5153.27			dirDIA	P26639	P26639	TARS	Threonine--tRNA ligase, cytoplasmic	P26639	SYTC_HUMAN	5626.5	8832.87	11759.6
libDIA	P25788	P25788	PSMA3	Proteasome subunit alpha type-3	P25788	PSA3_HUMAN	9089.84	6955.08	4116.67			dirDIA	P26640	P26640	VARS	Valine--tRNA ligase	P26640	SYVC_HUMAN	3662.73	2376.29	4170.4
libDIA	P25789	P25789	PSMA4	Proteasome subunit alpha type-4	P25789	PSA4_HUMAN	35125.9	28477.9	31494.5			dirDIA	P26641	P26641	EEF1G	Elongation factor 1-gamma	P26641	EF1G_HUMAN	98172.3	104024	81413.2
libDIA	P26038	P26038	MSN	Moesin	P26038	MOES_HUMAN	26932.9	24621	20562.2			dirDIA	P26885	P26885	FKBP2	Peptidyl-prolyl cis-trans isomerase FKBP2	P26885	FKBP2_HUMAN	3298.52	3119.03	7658.6
libDIA	P26196	P26196	DDX6	Probable ATP-dependent RNA helicase DDX6	P26196	DDX6_HUMAN	Filtered	Filtered	7342.41			dirDIA	P27348	P27348	YWHAQ	14-3-3 protein theta	P27348	1433T_HUMAN	1.79298	6600.92	1271.52
libDIA	P26358	P26358	DNMT1	DNA (cytosine-5)-methyltransferase 1	P26358	DNMT1_HUMAN	10578.5	8208.14	6532.24			dirDIA	P27635	P27635	RPL10	60S ribosomal protein L10	P27635	RL10_HUMAN	426.089	2098.45	3690.62
libDIA	P26368	P26368	U2AF2	Splicing factor U2AF 65 kDa subunit	P26368	U2AF2_HUMAN	Filtered	Filtered	14209.2			dirDIA	P27695	P27695	APEX1	DNA-(apurinic or apyrimidinic site) lyase	P27695	APEX1_HUMAN	14021.2	20841.6	30933.9
libDIA	P26373	P26373	RPL13	60S ribosomal protein L13	P26373	RL13_HUMAN	20580.2	28072.7	33710.9			dirDIA	P27797	P27797	CALR	Calreticulin	P27797	CALR_HUMAN	6603.38	7032.9	8777.49
libDIA	P26583	P26583	HMGB2	High mobility group protein B2	P26583	HMGB2_HUMAN	29174.9	28396.1	7901.67			dirDIA	P27816	P27816	MAP4	Microtubule-associated protein 4	P27816	MAP4_HUMAN	4830.08	6878.28	4518.44
libDIA	P26599	P26599	PTBP1	Polypyrimidine tract-binding protein 1	P26599	PTBP1_HUMAN	54452.6	28395.7	27241.9			dirDIA	P27824	P27824	CANX	Calnexin	P27824	CALX_HUMAN	4554.14	4328.87	7984.25
libDIA	P26639	P26639	TARS	Threonine--tRNA ligase, cytoplasmic	P26639	SYTC_HUMAN	Filtered	17173.2	8567.49			dirDIA	P28062	P28062	PSMB8	Proteasome subunit beta type-8	P28062	PSB8_HUMAN	7251.74	8487.15	9494.25
libDIA	P26640	P26640	VARS	Valine--tRNA ligase	P26640	SYVC_HUMAN	Filtered	9921.38	6391.24			dirDIA	P28065	P28065	PSMB9	Proteasome subunit beta type-9	P28065	PSB9_HUMAN	11009.8	12408.4	9554.93
libDIA	P26641	P26641	EEF1G	Elongation factor 1-gamma	P26641	EF1G_HUMAN	81436.8	85137.8	76984.8			dirDIA	P28066	P28066	PSMA5	Proteasome subunit alpha type-5	P28066	PSA5_HUMAN	9161.37	11476.1	7780.38
libDIA	P26885	P26885	FKBP2	Peptidyl-prolyl cis-trans isomerase FKBP2	P26885	FKBP2_HUMAN	Filtered	Filtered	2922.24			dirDIA	P28070	P28070	PSMB4	Proteasome subunit beta type-4	P28070	PSB4_HUMAN	3596.69	2130.51	5424.98
libDIA	P27348	P27348	YWHAQ	14-3-3 protein theta	P27348	1433T_HUMAN	Filtered	6504.43	2263.95			dirDIA	P28072	P28072	PSMB6	Proteasome subunit beta type-6	P28072	PSB6_HUMAN	8261.38	6216.93	2262.64
libDIA	P27635	P27635	RPL10	60S ribosomal protein L10	P27635	RL10_HUMAN	Filtered	Filtered	3164.78			dirDIA	P28074	P28074	PSMB5	Proteasome subunit beta type-5	P28074	PSB5_HUMAN	1320.54	1578.82	3190.11
libDIA	P27695	P27695	APEX1	DNA-(apurinic or apyrimidinic site) lyase	P27695	APEX1_HUMAN	27919.7	20368.8	32264.2			dirDIA	P28838	P28838	LAP3	Cytosol aminopeptidase	P28838	AMPL_HUMAN	14081	15655.5	16924.6
libDIA	P27708	P27708	CAD	CAD protein	P27708	PYR1_HUMAN	8131.83	6759.27	5699.78			dirDIA	P29144	P29144	TPP2	Tripeptidyl-peptidase 2	P29144	TPP2_HUMAN	645.115	614.807	1869.43
libDIA	P27797	P27797	CALR	Calreticulin	P27797	CALR_HUMAN	8274.96	16092.9	10185.5			dirDIA	P29218	P29218	IMPA1	Inositol monophosphatase 1	P29218	IMPA1_HUMAN	2156.76	7308.27	6254.8
libDIA	P27816	P27816	MAP4	Microtubule-associated protein 4	P27816	MAP4_HUMAN	4788.25	8592.68	5711.25			dirDIA	P29350	P29350	PTPN6	Tyrosine-protein phosphatase non-receptor type 6	P29350	PTN6_HUMAN	14765.3	12160.2	15474.4
libDIA	P27824	P27824	CANX	Calnexin	P27824	CALX_HUMAN	15106.4	11655.6	7818.29			dirDIA	P29401	P29401	TKT	Transketolase	P29401	TKT_HUMAN	16114.9	12363	11123.5
libDIA	P28062	P28062	PSMB8	Proteasome subunit beta type-8	P28062	PSB8_HUMAN	9939.29	13261.8	15418.8			dirDIA	P29508;P48594	P29508;P48594	SERPINB3;SERPINB4	Serpin B3;Serpin B4	P29508;P48594	SPB3_HUMAN;SPB4_HUMAN	2807.34	3798.67	4588.94
libDIA	P28065	P28065	PSMB9	Proteasome subunit beta type-9	P28065	PSB9_HUMAN	11410	Filtered	9744.16			dirDIA	P29692	P29692	EEF1D	Elongation factor 1-delta	P29692	EF1D_HUMAN	42492.7	40150.6	35659.5
libDIA	P28066	P28066	PSMA5	Proteasome subunit alpha type-5	P28066	PSA5_HUMAN	11410.9	12762.3	8872.83			dirDIA	P30040	P30040	ERP29	Endoplasmic reticulum resident protein 29	P30040	ERP29_HUMAN	5685.71	3981.96	6761.88
libDIA	P28070	P28070	PSMB4	Proteasome subunit beta type-4	P28070	PSB4_HUMAN	Filtered	10902.2	6763.92			dirDIA	P30041	P30041	PRDX6	Peroxiredoxin-6	P30041	PRDX6_HUMAN	17120.3	20848	21398.7
libDIA	P28072	P28072	PSMB6	Proteasome subunit beta type-6	P28072	PSB6_HUMAN	13284.6	8868.6	2500.06			dirDIA	P30044	P30044	PRDX5	Peroxiredoxin-5, mitochondrial	P30044	PRDX5_HUMAN	27667.8	30227.2	20497.5
libDIA	P28074	P28074	PSMB5	Proteasome subunit beta type-5	P28074	PSB5_HUMAN	Filtered	Filtered	3766.04			dirDIA	P30048	P30048	PRDX3	Thioredoxin-dependent peroxide reductase, mitochondrial	P30048	PRDX3_HUMAN	33796.2	20035.7	29899.9
libDIA	P28482	P28482	MAPK1	Mitogen-activated protein kinase 1	P28482	MK01_HUMAN	6539.96	6206.02	Filtered			dirDIA	P30049	P30049	ATP5D	ATP synthase subunit delta, mitochondrial	P30049	ATPD_HUMAN	14309.2	13785.4	Filtered
libDIA	P28838	P28838	LAP3	Cytosol aminopeptidase	P28838	AMPL_HUMAN	13871	15891.7	16761.7			dirDIA	P30050	P30050	RPL12	60S ribosomal protein L12	P30050	RL12_HUMAN	52263.6	103009	44755.4
libDIA	P29144	P29144	TPP2	Tripeptidyl-peptidase 2	P29144	TPP2_HUMAN	Filtered	Filtered	5831.2			dirDIA	P30086	P30086	PEBP1	Phosphatidylethanolamine-binding protein 1	P30086	PEBP1_HUMAN	20795.8	18252.7	31863.1
libDIA	P29218	P29218	IMPA1	Inositol monophosphatase 1	P29218	IMPA1_HUMAN	Filtered	Filtered	4947.86			dirDIA	P30101	P30101	PDIA3	Protein disulfide-isomerase A3	P30101	PDIA3_HUMAN	25165.2	21103.1	23421.3
libDIA	P29350	P29350	PTPN6	Tyrosine-protein phosphatase non-receptor type 6	P29350	PTN6_HUMAN	15316.5	15468.1	15679.7			dirDIA	P30466	P30466	HLA-B	HLA class I histocompatibility antigen, B-18 alpha chain	P30466	1B18_HUMAN	8073.39	7574.66	7219.31
libDIA	P29401	P29401	TKT	Transketolase	P29401	TKT_HUMAN	21732.3	13013.5	11993.7			dirDIA	P31146	P31146	CORO1A	Coronin-1A	P31146	COR1A_HUMAN	43620.8	42360	40941.4
libDIA	P29692	P29692	EEF1D	Elongation factor 1-delta	P29692	EF1D_HUMAN	37426.1	34309	25139.4			dirDIA	P31151	P31151	S100A7	Protein S100-A7	P31151	S10A7_HUMAN	2569.15	7009.97	12963.4
libDIA	P30040	P30040	ERP29	Endoplasmic reticulum resident protein 29	P30040	ERP29_HUMAN	Filtered	6552.52	7451.63			dirDIA	P31153	P31153	MAT2A	S-adenosylmethionine synthase isoform type-2	P31153	METK2_HUMAN	6031.51	10326.7	11934.6
libDIA	P30041	P30041	PRDX6	Peroxiredoxin-6	P30041	PRDX6_HUMAN	10026.8	22862.8	24221.6			dirDIA	P31350	P31350	RRM2	Ribonucleoside-diphosphate reductase subunit M2	P31350	RIR2_HUMAN	4613.45	3164.38	1611.26
libDIA	P30044	P30044	PRDX5	Peroxiredoxin-5, mitochondrial	P30044	PRDX5_HUMAN	27846.9	30749.4	12042			dirDIA	P31689	P31689	DNAJA1	DnaJ homolog subfamily A member 1	P31689	DNJA1_HUMAN	516.66	443.877	607.031
libDIA	P30048	P30048	PRDX3	Thioredoxin-dependent peroxide reductase, mitochondrial	P30048	PRDX3_HUMAN	127460	116334	48712.4			dirDIA	P31930	P31930	UQCRC1	Cytochrome b-c1 complex subunit 1, mitochondrial	P31930	QCR1_HUMAN	4902.26	5536.64	3717.71
libDIA	P30049	P30049	ATP5D	ATP synthase subunit delta, mitochondrial	P30049	ATPD_HUMAN	12545.5	19512.8	Filtered			dirDIA	P31939	P31939	ATIC	Bifunctional purine biosynthesis protein PURH	P31939	PUR9_HUMAN	35448	30363.3	27867.3
libDIA	P30050	P30050	RPL12	60S ribosomal protein L12	P30050	RL12_HUMAN	105573	103235	32094.3			dirDIA	P31942	P31942	HNRNPH3	Heterogeneous nuclear ribonucleoprotein H3	P31942	HNRH3_HUMAN	5536.58	9093.34	6315.67
libDIA	P30085	P30085	CMPK1	UMP-CMP kinase	P30085	KCY_HUMAN	11822.8	Filtered	8759.45			dirDIA	P31943	P31943	HNRNPH1	Heterogeneous nuclear ribonucleoprotein H	P31943	HNRH1_HUMAN	6133.37	4791	12933.3
libDIA	P30086	P30086	PEBP1	Phosphatidylethanolamine-binding protein 1	P30086	PEBP1_HUMAN	42638.6	35561.3	22396.8			dirDIA	P31944	P31944	CASP14	Caspase-14	P31944	CASPE_HUMAN	396.474	238.174	4478.41
libDIA	P30101	P30101	PDIA3	Protein disulfide-isomerase A3	P30101	PDIA3_HUMAN	23100.3	20830.3	23013.5			dirDIA	P31946	P31946	YWHAB	14-3-3 protein beta/alpha	P31946	1433B_HUMAN	46805	47911.9	35034
libDIA	P30153	P30153	PPP2R1A	Serine/threonine-protein phosphatase 2A 65 kDa regulatory subunit A alpha isoform	P30153	2AAA_HUMAN	8604.16	5478.45	3658.08			dirDIA	P31948	P31948	STIP1	Stress-induced-phosphoprotein 1	P31948	STIP1_HUMAN	28002.7	28426.5	22796.8
libDIA	P30405	P30405	PPIF	Peptidyl-prolyl cis-trans isomerase F, mitochondrial	P30405	PPIF_HUMAN	Filtered	Filtered	12177.2			dirDIA	P32119	P32119	PRDX2	Peroxiredoxin-2	P32119	PRDX2_HUMAN	21146.6	17623.5	20798.9
libDIA	P30466	P30466	HLA-B	HLA class I histocompatibility antigen, B-18 alpha chain	P30466	1B18_HUMAN	8812.04	11378.9	7351.64			dirDIA	P32322	P32322	PYCR1	Pyrroline-5-carboxylate reductase 1, mitochondrial	P32322	P5CR1_HUMAN	1076.09	3156.3	2376.21
libDIA	P30566	P30566	ADSL	Adenylosuccinate lyase	P30566	PUR8_HUMAN	Filtered	Filtered	6006.59			dirDIA	P32969	P32969	RPL9	60S ribosomal protein L9	P32969	RL9_HUMAN	16449.3	23266.3	22768.4
libDIA	P31146	P31146	CORO1A	Coronin-1A	P31146	COR1A_HUMAN	49245.2	44024.1	43780.4			dirDIA	P33241	P33241	LSP1	Lymphocyte-specific protein 1	P33241	LSP1_HUMAN	2752.18	3472.41	5319.48
libDIA	P31153	P31153	MAT2A	S-adenosylmethionine synthase isoform type-2	P31153	METK2_HUMAN	4988.16	8287.81	7327.56			dirDIA	P33316	P33316	DUT	Deoxyuridine 5'-triphosphate nucleotidohydrolase, mitochondrial	P33316	DUT_HUMAN	4084.03	1917.53	6196.54
libDIA	P31483;Q01085	P31483;Q01085	TIA1;TIAL1	Nucleolysin TIA-1 isoform p40;Nucleolysin TIAR	P31483;Q01085	TIA1_HUMAN;TIAR_HUMAN	12433.9	11953.2	9688.91			dirDIA	P33991	P33991	MCM4	DNA replication licensing factor MCM4	P33991	MCM4_HUMAN	4671.31	5846.92	5202.89
libDIA	P31930	P31930	UQCRC1	Cytochrome b-c1 complex subunit 1, mitochondrial	P31930	QCR1_HUMAN	9406.48	Filtered	6140.57			dirDIA	P33992	P33992	MCM5	DNA replication licensing factor MCM5	P33992	MCM5_HUMAN	8407.34	10145.6	11829.4
libDIA	P31939	P31939	ATIC	Bifunctional purine biosynthesis protein PURH	P31939	PUR9_HUMAN	33642.3	31324.8	29799.8			dirDIA	P33993	P33993	MCM7	DNA replication licensing factor MCM7	P33993	MCM7_HUMAN	14215.3	18783.8	15215.4
libDIA	P31942	P31942	HNRNPH3	Heterogeneous nuclear ribonucleoprotein H3	P31942	HNRH3_HUMAN	8611.18	11589.4	5464.82			dirDIA	P34897	P34897	SHMT2	Serine hydroxymethyltransferase, mitochondrial	P34897	GLYM_HUMAN	48967.6	48388.3	51279.1
libDIA	P31943	P31943	HNRNPH1	Heterogeneous nuclear ribonucleoprotein H	P31943	HNRH1_HUMAN	25072.5	17246.4	12175.1			dirDIA	P34932	P34932	HSPA4	Heat shock 70 kDa protein 4	P34932	HSP74_HUMAN	8727.66	11992.3	11397.3
libDIA	P31946	P31946	YWHAB	14-3-3 protein beta/alpha	P31946	1433B_HUMAN	49124	48737.7	37213.1			dirDIA	P35030	P35030	PRSS3	Trypsin-3	P35030	TRY3_HUMAN	22476.5	29967.5	17302.2
libDIA	P31948	P31948	STIP1	Stress-induced-phosphoprotein 1	P31948	STIP1_HUMAN	40799.8	39583.3	34516.8			dirDIA	P35232	P35232	PHB	Prohibitin	P35232	PHB_HUMAN	39281.8	56088.9	45581
libDIA	P32119	P32119	PRDX2	Peroxiredoxin-2	P32119	PRDX2_HUMAN	24614.3	21484.8	25791.8			dirDIA	P35268	P35268	RPL22	60S ribosomal protein L22	P35268	RL22_HUMAN	107916	148637	116117
libDIA	P32322	P32322	PYCR1	Pyrroline-5-carboxylate reductase 1, mitochondrial	P32322	P5CR1_HUMAN	Filtered	4359.41	2228.66			dirDIA	P35527	P35527	KRT9	Keratin, type I cytoskeletal 9	P35527	K1C9_HUMAN	4974.31	3267.32	1.07702e+06
libDIA	P32942	P32942	ICAM3	Intercellular adhesion molecule 3	P32942	ICAM3_HUMAN	Filtered	Filtered	2345.48			dirDIA	P35579	P35579	MYH9	Myosin-9	P35579	MYH9_HUMAN	31730.4	39775.5	36404.3
libDIA	P32969	P32969	RPL9	60S ribosomal protein L9	P32969	RL9_HUMAN	16660.8	43964.9	24273			dirDIA	P35637	P35637	FUS	RNA-binding protein FUS	P35637	FUS_HUMAN	47116.2	40068.3	19331.5
libDIA	P33241	P33241	LSP1	Lymphocyte-specific protein 1	P33241	LSP1_HUMAN	Filtered	5174.92	8277.19			dirDIA	P35659	P35659	DEK	Protein DEK	P35659	DEK_HUMAN	6562.32	4635.04	5543.22
libDIA	P33316	P33316	DUT	Deoxyuridine 5'-triphosphate nucleotidohydrolase, mitochondrial	P33316	DUT_HUMAN	8758.55	4738.92	5310.43			dirDIA	P35754	P35754	GLRX	Glutaredoxin-1	P35754	GLRX1_HUMAN	355.074	Filtered	2824.98
libDIA	P33991	P33991	MCM4	DNA replication licensing factor MCM4	P33991	MCM4_HUMAN	3518.87	5293.86	5493.96			dirDIA	P35908	P35908	KRT2	Keratin, type II cytoskeletal 2 epidermal	P35908	K22E_HUMAN	215478	119775	956368
libDIA	P33992	P33992	MCM5	DNA replication licensing factor MCM5	P33992	MCM5_HUMAN	10406	27745.1	14102.8			dirDIA	P35998	P35998	PSMC2	26S protease regulatory subunit 7	P35998	PRS7_HUMAN	5162.89	4118.41	6283.82
libDIA	P33993	P33993	MCM7	DNA replication licensing factor MCM7	P33993	MCM7_HUMAN	12264.2	20215.1	16765.7			dirDIA	P36542	P36542	ATP5C1	ATP synthase subunit gamma, mitochondrial	P36542	ATPG_HUMAN	16469.1	13881.2	15285.6
libDIA	P34897	P34897	SHMT2	Serine hydroxymethyltransferase, mitochondrial	P34897	GLYM_HUMAN	48823.6	53761.3	50709.8			dirDIA	P36551	P36551	CPOX	Oxygen-dependent coproporphyrinogen-III oxidase, mitochondrial	P36551	HEM6_HUMAN	3660.8	2899.41	6606.23
libDIA	P34932	P34932	HSPA4	Heat shock 70 kDa protein 4	P34932	HSP74_HUMAN	12922.2	15988	15122.1			dirDIA	P36578	P36578	RPL4	60S ribosomal protein L4	P36578	RL4_HUMAN	16362.4	14043	19265.2
libDIA	P35030	P35030	PRSS3	Trypsin-3	P35030	TRY3_HUMAN	22792.3	30490.3	17939.1			dirDIA	P36873	P36873	PPP1CC	Serine/threonine-protein phosphatase PP1-gamma catalytic subunit	P36873	PP1G_HUMAN	2508.03	2026.87	2.57215
libDIA	P35232	P35232	PHB	Prohibitin	P35232	PHB_HUMAN	46213.5	64059.1	54284.3			dirDIA	P36957	P36957	DLST	Dihydrolipoyllysine-residue succinyltransferase component of 2-oxoglutarate dehydrogenase complex, mitochondrial	P36957	ODO2_HUMAN	6213.43	6885.52	4614.34
libDIA	P35237	P35237	SERPINB6	Serpin B6	P35237	SPB6_HUMAN	Filtered	Filtered	3537.72			dirDIA	P36969	P36969	GPX4	Phospholipid hydroperoxide glutathione peroxidase, mitochondrial	P36969	GPX4_HUMAN	Filtered	Filtered	1733.41
libDIA	P35268	P35268	RPL22	60S ribosomal protein L22	P35268	RL22_HUMAN	109406	148280	120313			dirDIA	P37108	P37108	SRP14	Signal recognition particle 14 kDa protein	P37108	SRP14_HUMAN	8325.23	13070.5	11778
libDIA	P35527	P35527	KRT9	Keratin, type I cytoskeletal 9	P35527	K1C9_HUMAN	20579.5	39223.7	2.19439e+06			dirDIA	P37802	P37802	TAGLN2	Transgelin-2	P37802	TAGL2_HUMAN	6450.69	11022.9	17370.7
libDIA	P35579	P35579	MYH9	Myosin-9	P35579	MYH9_HUMAN	29444.3	35894	37278.3			dirDIA	P37837	P37837	TALDO1	Transaldolase	P37837	TALDO_HUMAN	42379.1	36966.3	36016.8
libDIA	P35606	P35606	COPB2	Coatomer subunit beta'	P35606	COPB2_HUMAN	Filtered	Filtered	433797			dirDIA	P38159	P38159	RBMX	RNA-binding motif protein, X chromosome	P38159	RBMX_HUMAN	14921	15876	14916.1
libDIA	P35637	P35637	FUS	RNA-binding protein FUS	P35637	FUS_HUMAN	50725.6	41824.6	23366.4			dirDIA	P38646	P38646	HSPA9	Stress-70 protein, mitochondrial	P38646	GRP75_HUMAN	72195.7	85143.5	79231.6
libDIA	P35659	P35659	DEK	Protein DEK	P35659	DEK_HUMAN	16782.1	13665.5	9502.24			dirDIA	P38919	P38919	EIF4A3	Eukaryotic initiation factor 4A-III	P38919	IF4A3_HUMAN	16092.1	16684.5	15529
libDIA	P35908	P35908	KRT2	Keratin, type II cytoskeletal 2 epidermal	P35908	K22E_HUMAN	148985	94910.6	895653			dirDIA	P39019	P39019	RPS19	40S ribosomal protein S19	P39019	RS19_HUMAN	19975.6	19963	19681.1
libDIA	P35998	P35998	PSMC2	26S protease regulatory subunit 7	P35998	PRS7_HUMAN	8907.69	6238.85	7856.75			dirDIA	P39023	P39023	RPL3	60S ribosomal protein L3	P39023	RL3_HUMAN	11523.9	12009.6	20027.2
libDIA	P36405	P36405	ARL3	ADP-ribosylation factor-like protein 3	P36405	ARL3_HUMAN	Filtered	Filtered	5123.28			dirDIA	P39656	P39656	DDOST	Dolichyl-diphosphooligosaccharide--protein glycosyltransferase 48 kDa subunit	P39656	OST48_HUMAN	9559.39	10768.8	13852.2
libDIA	P36542	P36542	ATP5C1	ATP synthase subunit gamma, mitochondrial	P36542	ATPG_HUMAN	19698.4	14449.9	20352.4			dirDIA	P39687	P39687	ANP32A	Acidic leucine-rich nuclear phosphoprotein 32 family member A	P39687	AN32A_HUMAN	22825.2	16643.3	19574.4
libDIA	P36551	P36551	CPOX	Oxygen-dependent coproporphyrinogen-III oxidase, mitochondrial	P36551	HEM6_HUMAN	Filtered	4276.73	7405.14			dirDIA	P39748	P39748	FEN1	Flap endonuclease 1	P39748	FEN1_HUMAN	67244.2	74689	49286.2
libDIA	P36578	P36578	RPL4	60S ribosomal protein L4	P36578	RL4_HUMAN	17518.5	15118.2	21802.1			dirDIA	P40227	P40227	CCT6A	T-complex protein 1 subunit zeta	P40227	TCPZ_HUMAN	9922.92	9267.49	8243.63
libDIA	P36776	P36776	LONP1	Lon protease homolog, mitochondrial	P36776	LONM_HUMAN	Filtered	Filtered	1590.13			dirDIA	P40429;Q6NVV1	P40429;Q6NVV1	RPL13A;RPL13AP3	60S ribosomal protein L13a;Putative 60S ribosomal protein L13a protein RPL13AP3	P40429;Q6NVV1	RL13A_HUMAN;R13P3_HUMAN	32902	43744.9	47045.1
libDIA	P36873	P36873	PPP1CC	Serine/threonine-protein phosphatase PP1-gamma catalytic subunit	P36873	PP1G_HUMAN	3915.54	Filtered	4245.93			dirDIA	P40616	P40616	ARL1	ADP-ribosylation factor-like protein 1	P40616	ARL1_HUMAN	2304.23	2716.34	7902.3
libDIA	P36957	P36957	DLST	Dihydrolipoyllysine-residue succinyltransferase component of 2-oxoglutarate dehydrogenase complex, mitochondrial	P36957	ODO2_HUMAN	7493.64	9782.06	8334.84			dirDIA	P40925	P40925	MDH1	Malate dehydrogenase, cytoplasmic	P40925	MDHC_HUMAN	27805	17165	27989.3
libDIA	P36969	P36969	GPX4	Phospholipid hydroperoxide glutathione peroxidase, mitochondrial	P36969	GPX4_HUMAN	Filtered	Filtered	1465.24			dirDIA	P40926	P40926	MDH2	Malate dehydrogenase, mitochondrial	P40926	MDHM_HUMAN	93915.4	74060.6	83424.7
libDIA	P37108	P37108	SRP14	Signal recognition particle 14 kDa protein	P37108	SRP14_HUMAN	9304.59	14048.9	9240.73			dirDIA	P40939	P40939	HADHA	Trifunctional enzyme subunit alpha, mitochondrial	P40939	ECHA_HUMAN	16811.5	15054	9846.38
libDIA	P37802	P37802	TAGLN2	Transgelin-2	P37802	TAGL2_HUMAN	13159.4	16311.5	18399.4			dirDIA	P41091;Q2VIR3	P41091;Q2VIR3	EIF2S3;EIF2S3L	Eukaryotic translation initiation factor 2 subunit 3;Putative eukaryotic translation initiation factor 2 subunit 3-like protein	P41091;Q2VIR3	IF2G_HUMAN;IF2GL_HUMAN	5158.35	4499.85	2254.27
libDIA	P37837	P37837	TALDO1	Transaldolase	P37837	TALDO_HUMAN	43031.3	36796.8	36705.9			dirDIA	P41240	P41240	CSK	Tyrosine-protein kinase CSK	P41240	CSK_HUMAN	2454.15	1250.92	4024.94
libDIA	P38117	P38117	ETFB	Electron transfer flavoprotein subunit beta	P38117	ETFB_HUMAN	11806.6	10803	6178.04			dirDIA	P41250	P41250	GARS	Glycine--tRNA ligase	P41250	SYG_HUMAN	17412.8	18427.4	13108.1
libDIA	P38159;Q96E39	P38159;Q96E39	RBMX;RBMXL1	RNA-binding motif protein, X chromosome;RNA binding motif protein, X-linked-like-1	P38159;Q96E39	RBMX_HUMAN;RMXL1_HUMAN	11836.2	14380.8	15146.5			dirDIA	P41252	P41252	IARS	Isoleucine--tRNA ligase, cytoplasmic	P41252	SYIC_HUMAN	8366.71	9457.99	10429.5
libDIA	P38646	P38646	HSPA9	Stress-70 protein, mitochondrial	P38646	GRP75_HUMAN	66745.3	75979.9	68953.2			dirDIA	P42166	P42166	TMPO	Lamina-associated polypeptide 2, isoform alpha	P42166	LAP2A_HUMAN	21640.7	20825.2	16602.2
libDIA	P38919	P38919	EIF4A3	Eukaryotic initiation factor 4A-III	P38919	IF4A3_HUMAN	18285.2	18396.1	17945.1			dirDIA	P42167	P42167	TMPO	Lamina-associated polypeptide 2, isoforms beta/gamma	P42167	LAP2B_HUMAN	17143.8	4544.42	11063.1
libDIA	P39019	P39019	RPS19	40S ribosomal protein S19	P39019	RS19_HUMAN	37903.4	34600.3	26319.6			dirDIA	P42224	P42224	STAT1	Signal transducer and activator of transcription 1-alpha/beta	P42224	STAT1_HUMAN	3621.73	3972.27	4711.17
libDIA	P39023	P39023	RPL3	60S ribosomal protein L3	P39023	RL3_HUMAN	22277.1	15990.3	19845.5			dirDIA	P42285	P42285	SKIV2L2	Superkiller viralicidic activity 2-like 2	P42285	SK2L2_HUMAN	1224.91	572.031	2259.92
libDIA	P39656	P39656	DDOST	Dolichyl-diphosphooligosaccharide--protein glycosyltransferase 48 kDa subunit	P39656	OST48_HUMAN	8674.12	13750.2	14231.7			dirDIA	P42677	P42677	RPS27	40S ribosomal protein S27	P42677	RS27_HUMAN	6371.35	7488.29	7281.18
libDIA	P39687	P39687	ANP32A	Acidic leucine-rich nuclear phosphoprotein 32 family member A	P39687	AN32A_HUMAN	30850.4	26058.6	21699.9			dirDIA	P42704	P42704	LRPPRC	Leucine-rich PPR motif-containing protein, mitochondrial	P42704	LPPRC_HUMAN	17696.2	16940.4	15108.3
libDIA	P39748	P39748	FEN1	Flap endonuclease 1	P39748	FEN1_HUMAN	43485.9	44089.5	26655.5			dirDIA	P42765	P42765	ACAA2	3-ketoacyl-CoA thiolase, mitochondrial	P42765	THIM_HUMAN	8336.34	6257.53	5394.12
libDIA	P40227	P40227	CCT6A	T-complex protein 1 subunit zeta	P40227	TCPZ_HUMAN	14866.5	12579.3	9645.08			dirDIA	P42766	P42766	RPL35	60S ribosomal protein L35	P42766	RL35_HUMAN	32122	29999.5	1750.04
libDIA	P40429	P40429	RPL13A	60S ribosomal protein L13a	P40429	RL13A_HUMAN	33836	43890.4	34566.8			dirDIA	P43243	P43243	MATR3	Matrin-3	P43243	MATR3_HUMAN	7746.5	5242.62	6628.4
libDIA	P40616	P40616	ARL1	ADP-ribosylation factor-like protein 1	P40616	ARL1_HUMAN	Filtered	Filtered	7159.87			dirDIA	P43307	P43307	SSR1	Translocon-associated protein subunit alpha	P43307	SSRA_HUMAN	12768.3	14152.2	13787.2
libDIA	P40925	P40925	MDH1	Malate dehydrogenase, cytoplasmic	P40925	MDHC_HUMAN	44847.1	29064.2	31468.2			dirDIA	P43487	P43487	RANBP1	Ran-specific GTPase-activating protein	P43487	RANG_HUMAN	11288.9	8294.42	18682.7
libDIA	P40926	P40926	MDH2	Malate dehydrogenase, mitochondrial	P40926	MDHM_HUMAN	91562.1	72013.7	82296.9			dirDIA	P43490	P43490	NAMPT	Nicotinamide phosphoribosyltransferase	P43490	NAMPT_HUMAN	9538.98	18661.7	20567.1
libDIA	P40939	P40939	HADHA	Trifunctional enzyme subunit alpha, mitochondrial	P40939	ECHA_HUMAN	11324.4	13914.4	6540.97			dirDIA	P45880	P45880	VDAC2	Voltage-dependent anion-selective channel protein 2	P45880	VDAC2_HUMAN	16093.2	21773.8	19419.4
libDIA	P41091;Q2VIR3	P41091;Q2VIR3	EIF2S3;EIF2S3L	Eukaryotic translation initiation factor 2 subunit 3;Putative eukaryotic translation initiation factor 2 subunit 3-like protein	P41091;Q2VIR3	IF2G_HUMAN;IF2GL_HUMAN	6119.27	6248.16	3356.4			dirDIA	P46013	P46013	MKI67	Antigen KI-67	P46013	KI67_HUMAN	8007.13	6425.68	9026.71
libDIA	P41240	P41240	CSK	Tyrosine-protein kinase CSK	P41240	CSK_HUMAN	Filtered	Filtered	6084.31			dirDIA	P46060	P46060	RANGAP1	Ran GTPase-activating protein 1	P46060	RAGP1_HUMAN	1847.4	1474	2797.37
libDIA	P41250	P41250	GARS	Glycine--tRNA ligase	P41250	SYG_HUMAN	28440.7	31134.1	16441.9			dirDIA	P46087	P46087	NOP2	Probable 28S rRNA (cytosine(4447)-C(5))-methyltransferase	P46087	NOP2_HUMAN	4476.45	4239	5740.05
libDIA	P41252	P41252	IARS	Isoleucine--tRNA ligase, cytoplasmic	P41252	SYIC_HUMAN	8386.79	10000.2	8809.62			dirDIA	P46776	P46776	RPL27A	60S ribosomal protein L27a	P46776	RL27A_HUMAN	76915.1	137190	94681.9
libDIA	P42166	P42166	TMPO	Lamina-associated polypeptide 2, isoform alpha	P42166	LAP2A_HUMAN	21031.2	20667.6	17282.3			dirDIA	P46777	P46777	RPL5	60S ribosomal protein L5	P46777	RL5_HUMAN	45318.1	42692.9	1
libDIA	P42167	P42167	TMPO	Lamina-associated polypeptide 2, isoforms beta/gamma	P42167	LAP2B_HUMAN	8597.75	10705.3	7959.54			dirDIA	P46778	P46778	RPL21	60S ribosomal protein L21	P46778	RL21_HUMAN	8394.8	6299.93	9423.52
libDIA	P42224	P42224	STAT1	Signal transducer and activator of transcription 1-alpha/beta	P42224	STAT1_HUMAN	3966.53	11360.9	7693.36			dirDIA	P46781	P46781	RPS9	40S ribosomal protein S9	P46781	RS9_HUMAN	52233.5	56286.3	56955.1
libDIA	P42704	P42704	LRPPRC	Leucine-rich PPR motif-containing protein, mitochondrial	P42704	LPPRC_HUMAN	20145.9	20484.9	23513.8			dirDIA	P46782	P46782	RPS5	40S ribosomal protein S5	P46782	RS5_HUMAN	40118.8	31884.9	25691.5
libDIA	P42765	P42765	ACAA2	3-ketoacyl-CoA thiolase, mitochondrial	P42765	THIM_HUMAN	11321.5	9236	4730.52			dirDIA	P46783	P46783	RPS10	40S ribosomal protein S10	P46783	RS10_HUMAN	27427.4	28120.5	23649.9
libDIA	P42766	P42766	RPL35	60S ribosomal protein L35	P42766	RL35_HUMAN	57740.7	52247.9	66189.8			dirDIA	P46940	P46940	IQGAP1	Ras GTPase-activating-like protein IQGAP1	P46940	IQGA1_HUMAN	6356.18	7252.13	5653.42
libDIA	P43307	P43307	SSR1	Translocon-associated protein subunit alpha	P43307	SSRA_HUMAN	17042.7	20348.9	18624.3			dirDIA	P47756	P47756	CAPZB	F-actin-capping protein subunit beta	P47756	CAPZB_HUMAN	5204.78	6241.34	7781.68
libDIA	P43487	P43487	RANBP1	Ran-specific GTPase-activating protein	P43487	RANG_HUMAN	Filtered	8688.9	11841.3			dirDIA	P47897	P47897	QARS	Glutamine--tRNA ligase	P47897	SYQ_HUMAN	5747.64	8391.92	9828.01
libDIA	P43490	P43490	NAMPT	Nicotinamide phosphoribosyltransferase	P43490	NAMPT_HUMAN	20977.9	24074.1	20617.1			dirDIA	P47929	P47929	LGALS7	Galectin-7	P47929	LEG7_HUMAN	3035.74	7262.13	5312.91
libDIA	P43686	P43686	PSMC4	26S protease regulatory subunit 6B	P43686	PRS6B_HUMAN	Filtered	Filtered	9687.67			dirDIA	P48047	P48047	ATP5O	ATP synthase subunit O, mitochondrial	P48047	ATPO_HUMAN	18068.8	23139.2	23464.5
libDIA	P45880	P45880	VDAC2	Voltage-dependent anion-selective channel protein 2	P45880	VDAC2_HUMAN	21613.9	51472.1	19718.5			dirDIA	P48444	P48444	ARCN1	Coatomer subunit delta	P48444	COPD_HUMAN	2038.73	5360.72	5566.75
libDIA	P45974	P45974	USP5	Ubiquitin carboxyl-terminal hydrolase 5	P45974	UBP5_HUMAN	Filtered	Filtered	5652.16			dirDIA	P48556	P48556	PSMD8	26S proteasome non-ATPase regulatory subunit 8	P48556	PSMD8_HUMAN	9840	8320.34	8529.04
libDIA	P46013	P46013	MKI67	Antigen KI-67	P46013	KI67_HUMAN	10417.9	10183.8	12552			dirDIA	P48643	P48643	CCT5	T-complex protein 1 subunit epsilon	P48643	TCPE_HUMAN	8504.79	12894.7	8379.62
libDIA	P46060	P46060	RANGAP1	Ran GTPase-activating protein 1	P46060	RAGP1_HUMAN	Filtered	Filtered	2506.85			dirDIA	P48735	P48735	IDH2	Isocitrate dehydrogenase [NADP], mitochondrial	P48735	IDHP_HUMAN	4390.09	4149.42	7908.35
libDIA	P46087	P46087	NOP2	Probable 28S rRNA (cytosine(4447)-C(5))-methyltransferase	P46087	NOP2_HUMAN	5032.9	4297.62	8401.04			dirDIA	P49005	P49005	POLD2	DNA polymerase delta subunit 2	P49005	DPOD2_HUMAN	1280.7	2001.25	1590.17
libDIA	P46109	P46109	CRKL	Crk-like protein	P46109	CRKL_HUMAN	Filtered	Filtered	2161.17			dirDIA	P49207	P49207	RPL34	60S ribosomal protein L34	P49207	RL34_HUMAN	39735.8	36153	29098.8
libDIA	P46776	P46776	RPL27A	60S ribosomal protein L27a	P46776	RL27A_HUMAN	42815.1	144951	53452.6			dirDIA	P49321	P49321	NASP	Nuclear autoantigenic sperm protein	P49321	NASP_HUMAN	11826.4	10687.3	5391.16
libDIA	P46777	P46777	RPL5	60S ribosomal protein L5	P46777	RL5_HUMAN	26173.9	25422.5	Filtered			dirDIA	P49327	P49327	FASN	Fatty acid synthase	P49327	FAS_HUMAN	6911.58	10323	10900.8
libDIA	P46778	P46778	RPL21	60S ribosomal protein L21	P46778	RL21_HUMAN	Filtered	Filtered	11919			dirDIA	P49368	P49368	CCT3	T-complex protein 1 subunit gamma	P49368	TCPG_HUMAN	10650.7	12109.2	17495.5
libDIA	P46781	P46781	RPS9	40S ribosomal protein S9	P46781	RS9_HUMAN	63335.5	68403.1	66316.4			dirDIA	P49411	P49411	TUFM	Elongation factor Tu, mitochondrial	P49411	EFTU_HUMAN	40361.3	38418	32142.7
libDIA	P46782	P46782	RPS5	40S ribosomal protein S5	P46782	RS5_HUMAN	40927.9	31759.5	26908.1			dirDIA	P49588	P49588	AARS	Alanine--tRNA ligase, cytoplasmic	P49588	SYAC_HUMAN	4456.46	10073.1	9783.92
libDIA	P46783	P46783	RPS10	40S ribosomal protein S10	P46783	RS10_HUMAN	29294.7	56523.3	24880.8			dirDIA	P49589	P49589	CARS	Cysteine--tRNA ligase, cytoplasmic	P49589	SYCC_HUMAN	2207.39	2425.26	1532.42
libDIA	P46940	P46940	IQGAP1	Ras GTPase-activating-like protein IQGAP1	P46940	IQGA1_HUMAN	3666.82	15092.5	6908.84			dirDIA	P49736	P49736	MCM2	DNA replication licensing factor MCM2	P49736	MCM2_HUMAN	12264.5	11237.4	7475.77
libDIA	P46977	P46977	STT3A	Dolichyl-diphosphooligosaccharide--protein glycosyltransferase subunit STT3A	P46977	STT3A_HUMAN	Filtered	Filtered	5816.48			dirDIA	P49755	P49755	TMED10	Transmembrane emp24 domain-containing protein 10	P49755	TMEDA_HUMAN	424.068	342.85	1985.33
libDIA	P47756	P47756	CAPZB	F-actin-capping protein subunit beta	P47756	CAPZB_HUMAN	21820	13600.5	17823.8			dirDIA	P49915	P49915	GMPS	GMP synthase [glutamine-hydrolyzing]	P49915	GUAA_HUMAN	5396.18	8376	9932.64
libDIA	P47897	P47897	QARS	Glutamine--tRNA ligase	P47897	SYQ_HUMAN	5518.35	11588.6	8211.05			dirDIA	P50213	P50213	IDH3A	Isocitrate dehydrogenase [NAD] subunit alpha, mitochondrial	P50213	IDH3A_HUMAN	14132	10748.8	17381.9
libDIA	P48047	P48047	ATP5O	ATP synthase subunit O, mitochondrial	P48047	ATPO_HUMAN	20415.2	24963.7	28901.8			dirDIA	P50395	P50395	GDI2	Rab GDP dissociation inhibitor beta	P50395	GDIB_HUMAN	20858.5	22758.1	23113.9
libDIA	P48444	P48444	ARCN1	Coatomer subunit delta	P48444	COPD_HUMAN	5740.48	Filtered	7220.66			dirDIA	P50453	P50453	SERPINB9	Serpin B9	P50453	SPB9_HUMAN	4317.91	2075.75	7750.65
libDIA	P48556	P48556	PSMD8	26S proteasome non-ATPase regulatory subunit 8	P48556	PSMD8_HUMAN	11030.5	16372.1	6604.13			dirDIA	P50502;Q8IZP2	P50502;Q8IZP2	ST13;ST13P4	Hsc70-interacting protein;Putative protein FAM10A4	P50502;Q8IZP2	F10A1_HUMAN;ST134_HUMAN	14577.4	20741.2	15052.4
libDIA	P48637	P48637	GSS	Glutathione synthetase	P48637	GSHB_HUMAN	6756.19	5203.03	5571.61			dirDIA	P50914	P50914	RPL14	60S ribosomal protein L14	P50914	RL14_HUMAN	38193.8	43749.6	43081.9
libDIA	P48643	P48643	CCT5	T-complex protein 1 subunit epsilon	P48643	TCPE_HUMAN	17258.1	13315.3	9780.34			dirDIA	P50990	P50990	CCT8	T-complex protein 1 subunit theta	P50990	TCPQ_HUMAN	39187.7	45272.6	37586
libDIA	P48735	P48735	IDH2	Isocitrate dehydrogenase [NADP], mitochondrial	P48735	IDHP_HUMAN	8515.73	5959.86	12538.5			dirDIA	P50991	P50991	CCT4	T-complex protein 1 subunit delta	P50991	TCPD_HUMAN	19660.4	25115.3	21357.6
libDIA	P49005	P49005	POLD2	DNA polymerase delta subunit 2	P49005	DPOD2_HUMAN	Filtered	Filtered	2815.25			dirDIA	P50995	P50995	ANXA11	Annexin A11	P50995	ANX11_HUMAN	1134.16	1360.76	2467.08
libDIA	P49207	P49207	RPL34	60S ribosomal protein L34	P49207	RL34_HUMAN	41029.7	36693.8	30856.6			dirDIA	P51149	P51149	RAB7A	Ras-related protein Rab-7a	P51149	RAB7A_HUMAN	18946.5	20579.8	16182.4
libDIA	P49257	P49257	LMAN1	Protein ERGIC-53	P49257	LMAN1_HUMAN	11911.3	8976.59	4762.69			dirDIA	P51571	P51571	SSR4	Translocon-associated protein subunit delta	P51571	SSRD_HUMAN	9468.33	5899.54	10486.4
libDIA	P49321	P49321	NASP	Nuclear autoantigenic sperm protein	P49321	NASP_HUMAN	28830.3	29665.8	23858.7			dirDIA	P51659	P51659	HSD17B4	Peroxisomal multifunctional enzyme type 2	P51659	DHB4_HUMAN	4445.16	6617.68	7451.38
libDIA	P49327	P49327	FASN	Fatty acid synthase	P49327	FAS_HUMAN	6319.15	9113.51	10086.7			dirDIA	P51858	P51858	HDGF	Hepatoma-derived growth factor	P51858	HDGF_HUMAN	13158.1	12683.2	9161.81
libDIA	P49368	P49368	CCT3	T-complex protein 1 subunit gamma	P49368	TCPG_HUMAN	21884.7	17708.2	21679.5			dirDIA	P51991	P51991	HNRNPA3	Heterogeneous nuclear ribonucleoprotein A3	P51991	ROA3_HUMAN	10389.2	8750.51	7719.45
libDIA	P49411	P49411	TUFM	Elongation factor Tu, mitochondrial	P49411	EFTU_HUMAN	33185.2	35846.6	30253.6			dirDIA	P52209	P52209	PGD	6-phosphogluconate dehydrogenase, decarboxylating	P52209	6PGD_HUMAN	24736.3	21000.1	24483.2
libDIA	P49588	P49588	AARS	Alanine--tRNA ligase, cytoplasmic	P49588	SYAC_HUMAN	8994.71	19039.4	7484.31			dirDIA	P52272	P52272	HNRNPM	Heterogeneous nuclear ribonucleoprotein M	P52272	HNRPM_HUMAN	12054.4	12599.5	17073
libDIA	P49720	P49720	PSMB3	Proteasome subunit beta type-3	P49720	PSB3_HUMAN	3912.24	Filtered	3276.78			dirDIA	P52565	P52565	ARHGDIA	Rho GDP-dissociation inhibitor 1	P52565	GDIR1_HUMAN	5890.15	7700.32	1921.58
libDIA	P49736	P49736	MCM2	DNA replication licensing factor MCM2	P49736	MCM2_HUMAN	14280.6	13385.1	9188.87			dirDIA	P52566	P52566	ARHGDIB	Rho GDP-dissociation inhibitor 2	P52566	GDIR2_HUMAN	12951.1	13292.4	13442.7
libDIA	P49755	P49755	TMED10	Transmembrane emp24 domain-containing protein 10	P49755	TMEDA_HUMAN	Filtered	Filtered	5045.21			dirDIA	P52597	P52597	HNRNPF	Heterogeneous nuclear ribonucleoprotein F	P52597	HNRPF_HUMAN	796.017	1730.57	707.623
libDIA	P49756	P49756	RBM25	RNA-binding protein 25	P49756	RBM25_HUMAN	14125.3	Filtered	13670			dirDIA	P52907	P52907	CAPZA1	F-actin-capping protein subunit alpha-1	P52907	CAZA1_HUMAN	13144	11350.5	19686.7
libDIA	P49773	P49773	HINT1	Histidine triad nucleotide-binding protein 1	P49773	HINT1_HUMAN	17809.8	12973	12026.3			dirDIA	P53004	P53004	BLVRA	Biliverdin reductase A	P53004	BIEA_HUMAN	4661.62	7085.26	5767.25
libDIA	P49792	P49792	RANBP2	E3 SUMO-protein ligase RanBP2	P49792	RBP2_HUMAN	Filtered	7223577	18766610			dirDIA	P53396	P53396	ACLY	ATP-citrate synthase	P53396	ACLY_HUMAN	1431.83	815.033	1899.86
libDIA	P49915	P49915	GMPS	GMP synthase [glutamine-hydrolyzing]	P49915	GUAA_HUMAN	10918.3	6769.26	9746.21			dirDIA	P53621	P53621	COPA	Coatomer subunit alpha	P53621	COPA_HUMAN	5688.9	4964.67	6547.14
libDIA	P50213	P50213	IDH3A	Isocitrate dehydrogenase [NAD] subunit alpha, mitochondrial	P50213	IDH3A_HUMAN	13146.8	10454	16631.3			dirDIA	P53634	P53634	CTSC	Dipeptidyl peptidase 1	P53634	CATC_HUMAN	5375.62	3633.75	8163.57
libDIA	P50395	P50395	GDI2	Rab GDP dissociation inhibitor beta	P50395	GDIB_HUMAN	21730.1	23570.6	18026.3			dirDIA	P53999	P53999	SUB1	Activated RNA polymerase II transcriptional coactivator p15	P53999	TCP4_HUMAN	63186.5	51168.6	41259.4
libDIA	P50453	P50453	SERPINB9	Serpin B9	P50453	SPB9_HUMAN	10699.5	4975.41	7774.19			dirDIA	P54105	P54105	CLNS1A	Methylosome subunit pICln	P54105	ICLN_HUMAN	2986.05	4467.52	6080.68
libDIA	P50502;Q8IZP2	P50502;Q8IZP2	ST13;ST13P4	Hsc70-interacting protein;Putative protein FAM10A4	P50502;Q8IZP2	F10A1_HUMAN;ST134_HUMAN	17835.4	23351.3	19330			dirDIA	P54136	P54136	RARS	Arginine--tRNA ligase, cytoplasmic	P54136	SYRC_HUMAN	8110.82	9428.99	9096.06
libDIA	P50570;Q05193	P50570;Q05193	DNM2;DNM1	Dynamin-2;Dynamin-1	P50570;Q05193	DYN2_HUMAN;DYN1_HUMAN	Filtered	Filtered	5687.31			dirDIA	P54577	P54577	YARS	Tyrosine--tRNA ligase, cytoplasmic	P54577	SYYC_HUMAN	14501	15679.3	12493.8
libDIA	P50851	P50851	LRBA	Lipopolysaccharide-responsive and beige-like anchor protein	P50851	LRBA_HUMAN	Filtered	Filtered	1661.52			dirDIA	P54578	P54578	USP14	Ubiquitin carboxyl-terminal hydrolase 14	P54578	UBP14_HUMAN	7857.19	5173.66	12111.1
libDIA	P50914	P50914	RPL14	60S ribosomal protein L14	P50914	RL14_HUMAN	39523.4	44502.3	86336.4			dirDIA	P54725	P54725	RAD23A	UV excision repair protein RAD23 homolog A	P54725	RD23A_HUMAN	17237.4	14506.1	12220.2
libDIA	P50990	P50990	CCT8	T-complex protein 1 subunit theta	P50990	TCPQ_HUMAN	38098.9	46663.5	38771.2			dirDIA	P54727	P54727	RAD23B	UV excision repair protein RAD23 homolog B	P54727	RD23B_HUMAN	9045.66	7743.59	8158.09
libDIA	P50991	P50991	CCT4	T-complex protein 1 subunit delta	P50991	TCPD_HUMAN	21510.3	23191.1	24459.4			dirDIA	P54819	P54819	AK2	Adenylate kinase 2, mitochondrial	P54819	KAD2_HUMAN	28727.3	25968.8	19552.4
libDIA	P50995	P50995	ANXA11	Annexin A11	P50995	ANX11_HUMAN	Filtered	Filtered	4247.35			dirDIA	P54886	P54886	ALDH18A1	Delta-1-pyrroline-5-carboxylate synthase	P54886	P5CS_HUMAN	3644.9	2239	5757.98
libDIA	P51114	P51114	FXR1	Fragile X mental retardation syndrome-related protein 1	P51114	FXR1_HUMAN	Filtered	11104.5	3302.92			dirDIA	P55010	P55010	EIF5	Eukaryotic translation initiation factor 5	P55010	IF5_HUMAN	13814.5	15837.5	11913.1
libDIA	P51148	P51148	RAB5C	Ras-related protein Rab-5C	P51148	RAB5C_HUMAN	9207.14	14672	7556.35			dirDIA	P55036	P55036	PSMD4	26S proteasome non-ATPase regulatory subunit 4	P55036	PSMD4_HUMAN	2364.17	6617.9	6044.21
libDIA	P51149	P51149	RAB7A	Ras-related protein Rab-7a	P51149	RAB7A_HUMAN	19306.4	21943.3	17276.3			dirDIA	P55060	P55060	CSE1L	Exportin-2	P55060	XPO2_HUMAN	5917.39	10448.8	8079.08
libDIA	P51571	P51571	SSR4	Translocon-associated protein subunit delta	P51571	SSRD_HUMAN	7668.62	6128.09	8734.85			dirDIA	P55072	P55072	VCP	Transitional endoplasmic reticulum ATPase	P55072	TERA_HUMAN	19613.7	24491.4	21466.2
libDIA	P51659	P51659	HSD17B4	Peroxisomal multifunctional enzyme type 2	P51659	DHB4_HUMAN	10610.9	12665.7	10618.2			dirDIA	P55084	P55084	HADHB	Trifunctional enzyme subunit beta, mitochondrial	P55084	ECHB_HUMAN	7143.75	8311.71	6762.4
libDIA	P51858	P51858	HDGF	Hepatoma-derived growth factor	P51858	HDGF_HUMAN	14482.1	8663.54	11700.4			dirDIA	P55209	P55209	NAP1L1	Nucleosome assembly protein 1-like 1	P55209	NP1L1_HUMAN	14398.2	12746.8	15962.3
libDIA	P51991	P51991	HNRNPA3	Heterogeneous nuclear ribonucleoprotein A3	P51991	ROA3_HUMAN	12092.2	12829	7802.56			dirDIA	P55263	P55263	ADK	Adenosine kinase	P55263	ADK_HUMAN	13711.8	14414.8	9903.26
libDIA	P52209	P52209	PGD	6-phosphogluconate dehydrogenase, decarboxylating	P52209	6PGD_HUMAN	24007.6	21951.5	25761			dirDIA	P55327	P55327	TPD52	Tumor protein D52	P55327	TPD52_HUMAN	1821.65	4911.43	3687.19
libDIA	P52272	P52272	HNRNPM	Heterogeneous nuclear ribonucleoprotein M	P52272	HNRPM_HUMAN	22452.6	23714.9	13827.7			dirDIA	P55769	P55769	SNU13	NHP2-like protein 1	P55769	NH2L1_HUMAN	11430.4	14221.6	11322
libDIA	P52292	P52292	KPNA2	Importin subunit alpha-1	P52292	IMA1_HUMAN	Filtered	Filtered	5041.23			dirDIA	P55854;P61956;Q6EEV6	P55854;P61956;Q6EEV6	SUMO3;SUMO2;SUMO4	Small ubiquitin-related modifier 3;Small ubiquitin-related modifier 2;Small ubiquitin-related modifier 4	P55854;P61956;Q6EEV6	SUMO3_HUMAN;SUMO2_HUMAN;SUMO4_HUMAN	53477.3	43686.3	38682.9
libDIA	P52565	P52565	ARHGDIA	Rho GDP-dissociation inhibitor 1	P52565	GDIR1_HUMAN	12096.5	9175.65	3856.41			dirDIA	P55884	P55884	EIF3B	Eukaryotic translation initiation factor 3 subunit B	P55884	EIF3B_HUMAN	9125.87	10144.7	9511.16
libDIA	P52566	P52566	ARHGDIB	Rho GDP-dissociation inhibitor 2	P52566	GDIR2_HUMAN	14044.6	26315	15986.5			dirDIA	P55957	P55957	BID	BH3-interacting domain death agonist	P55957	BID_HUMAN	12082	11288.5	7281.88
libDIA	P52907	P52907	CAPZA1	F-actin-capping protein subunit alpha-1	P52907	CAZA1_HUMAN	9817.12	8191.12	13372.6			dirDIA	P56134	P56134	ATP5J2	ATP synthase subunit f, mitochondrial	P56134	ATPK_HUMAN	5038.52	1933.93	5407.33
libDIA	P53004	P53004	BLVRA	Biliverdin reductase A	P53004	BIEA_HUMAN	7350.29	9267.02	4291.04			dirDIA	P56192	P56192	MARS	Methionine--tRNA ligase, cytoplasmic	P56192	SYMC_HUMAN	6301.41	6372.42	5295.78
libDIA	P53396	P53396	ACLY	ATP-citrate synthase	P53396	ACLY_HUMAN	7971.55	Filtered	2436.8			dirDIA	P56385	P56385	ATP5I	ATP synthase subunit e, mitochondrial	P56385	ATP5I_HUMAN	31166.9	25456.4	20505.6
libDIA	P53618	P53618	COPB1	Coatomer subunit beta	P53618	COPB_HUMAN	Filtered	Filtered	7940.31			dirDIA	P59998	P59998	ARPC4	Actin-related protein 2/3 complex subunit 4	P59998	ARPC4_HUMAN	24553.8	24054.9	25698.1
libDIA	P53621	P53621	COPA	Coatomer subunit alpha	P53621	COPA_HUMAN	Filtered	11173.8	10708			dirDIA	P60174	P60174	TPI1	Triosephosphate isomerase	P60174	TPIS_HUMAN	9712.5	5021.04	7629.84
libDIA	P53634	P53634	CTSC	Dipeptidyl peptidase 1	P53634	CATC_HUMAN	4989.1	Filtered	7883.01			dirDIA	P60228	P60228	EIF3E	Eukaryotic translation initiation factor 3 subunit E	P60228	EIF3E_HUMAN	3682.09	3537.14	2218.39
libDIA	P53680	P53680	AP2S1	AP-2 complex subunit sigma	P53680	AP2S1_HUMAN	9753.88	8987.48	8417.58			dirDIA	P60660	P60660	MYL6	Myosin light polypeptide 6	P60660	MYL6_HUMAN	18718.7	18078.5	37320.4
libDIA	P53999	P53999	SUB1	Activated RNA polymerase II transcriptional coactivator p15	P53999	TCP4_HUMAN	64765.6	51090.6	46720.2			dirDIA	P60709;P63261	P60709;P63261	ACTB;ACTG1	Actin, cytoplasmic 1;Actin, cytoplasmic 2	P60709;P63261	ACTB_HUMAN;ACTG_HUMAN	733057	829513	930651
libDIA	P54105	P54105	CLNS1A	Methylosome subunit pICln	P54105	ICLN_HUMAN	7581.37	8002.03	8643.22			dirDIA	P60842	P60842	EIF4A1	Eukaryotic initiation factor 4A-I	P60842	IF4A1_HUMAN	51028	46919.3	72692
libDIA	P54136	P54136	RARS	Arginine--tRNA ligase, cytoplasmic	P54136	SYRC_HUMAN	14634.3	7214.49	10511.8			dirDIA	P60866	P60866	RPS20	40S ribosomal protein S20	P60866	RS20_HUMAN	17742.7	18803.6	12736.7
libDIA	P54577	P54577	YARS	Tyrosine--tRNA ligase, cytoplasmic	P54577	SYYC_HUMAN	8038.45	11328.2	10677.1			dirDIA	P60900	P60900	PSMA6	Proteasome subunit alpha type-6	P60900	PSA6_HUMAN	22917.8	23444.4	22552.1
libDIA	P54578	P54578	USP14	Ubiquitin carboxyl-terminal hydrolase 14	P54578	UBP14_HUMAN	9785.84	6816.91	13686.1			dirDIA	P61086	P61086	UBE2K	Ubiquitin-conjugating enzyme E2 K	P61086	UBE2K_HUMAN	9509.71	8902.43	6569.18
libDIA	P54725	P54725	RAD23A	UV excision repair protein RAD23 homolog A	P54725	RD23A_HUMAN	17191.3	14992.9	12925.6			dirDIA	P61088;Q5JXB2	P61088;Q5JXB2	UBE2N;UBE2NL	Ubiquitin-conjugating enzyme E2 N;Putative ubiquitin-conjugating enzyme E2 N-like	P61088;Q5JXB2	UBE2N_HUMAN;UE2NL_HUMAN	40963.1	50527.4	32173.7
libDIA	P54727	P54727	RAD23B	UV excision repair protein RAD23 homolog B	P54727	RD23B_HUMAN	26974.9	11502.8	15617			dirDIA	P61106	P61106	RAB14	Ras-related protein Rab-14	P61106	RAB14_HUMAN	1664.59	1223.32	3652.64
libDIA	P54819	P54819	AK2	Adenylate kinase 2, mitochondrial	P54819	KAD2_HUMAN	43574.4	39658.4	17868.8			dirDIA	P61158	P61158	ACTR3	Actin-related protein 3	P61158	ARP3_HUMAN	3109.68	3886.15	8072.35
libDIA	P54886	P54886	ALDH18A1	Delta-1-pyrroline-5-carboxylate synthase	P54886	P5CS_HUMAN	Filtered	Filtered	6740.31			dirDIA	P61204;P84077;P84085	P61204;P84077;P84085	ARF3;ARF1;ARF5	ADP-ribosylation factor 3;ADP-ribosylation factor 1;ADP-ribosylation factor 5	P61204;P84077;P84085	ARF3_HUMAN;ARF1_HUMAN;ARF5_HUMAN	37644.3	43645.8	38938.1
libDIA	P55036	P55036	PSMD4	26S proteasome non-ATPase regulatory subunit 4	P55036	PSMD4_HUMAN	Filtered	6573.68	3879.1			dirDIA	P61221	P61221	ABCE1	ATP-binding cassette sub-family E member 1	P61221	ABCE1_HUMAN	1812.42	1557.62	1921.84
libDIA	P55060	P55060	CSE1L	Exportin-2	P55060	XPO2_HUMAN	15098.4	Filtered	8681.38			dirDIA	P61247	P61247	RPS3A	40S ribosomal protein S3a	P61247	RS3A_HUMAN	20151.6	16401.7	10622.7
libDIA	P55072	P55072	VCP	Transitional endoplasmic reticulum ATPase	P55072	TERA_HUMAN	15553.3	25242.7	20320			dirDIA	P61254;Q9UNX3	P61254;Q9UNX3	RPL26;RPL26L1	60S ribosomal protein L26;60S ribosomal protein L26-like 1	P61254;Q9UNX3	RL26_HUMAN;RL26L_HUMAN	107259	96001.9	87845.2
libDIA	P55084	P55084	HADHB	Trifunctional enzyme subunit beta, mitochondrial	P55084	ECHB_HUMAN	10098.2	11738.9	8209.17			dirDIA	P61289	P61289	PSME3	Proteasome activator complex subunit 3	P61289	PSME3_HUMAN	2113.09	889.054	2959.12
libDIA	P55209	P55209	NAP1L1	Nucleosome assembly protein 1-like 1	P55209	NP1L1_HUMAN	20231.1	18835.4	16500.3			dirDIA	P61313	P61313	RPL15	60S ribosomal protein L15	P61313	RL15_HUMAN	10366.7	16702.5	2398.03
libDIA	P55263	P55263	ADK	Adenosine kinase	P55263	ADK_HUMAN	19295.8	18670.6	13357.6			dirDIA	P61326;Q96A72	P61326;Q96A72	MAGOH;MAGOHB	Protein mago nashi homolog;Protein mago nashi homolog 2	P61326;Q96A72	MGN_HUMAN;MGN2_HUMAN	8388.27	7639.54	4953.88
libDIA	P55327	P55327	TPD52	Tumor protein D52	P55327	TPD52_HUMAN	Filtered	5439.36	4707.81			dirDIA	P61353	P61353	RPL27	60S ribosomal protein L27	P61353	RL27_HUMAN	16835	23868	26237.5
libDIA	P55769	P55769	SNU13	NHP2-like protein 1	P55769	NH2L1_HUMAN	13382.9	16069.7	13248.5			dirDIA	P61604	P61604	HSPE1	10 kDa heat shock protein, mitochondrial	P61604	CH10_HUMAN	183000	179185	161870
libDIA	P55786	P55786	NPEPPS	Puromycin-sensitive aminopeptidase	P55786	PSA_HUMAN	4807.85	Filtered	3891.51			dirDIA	P61626	P61626	LYZ	Lysozyme C	P61626	LYSC_HUMAN	Filtered	321.744	4852.2
libDIA	P55809	P55809	OXCT1	Succinyl-CoA:3-ketoacid coenzyme A transferase 1, mitochondrial	P55809	SCOT1_HUMAN	Filtered	Filtered	6109.54			dirDIA	P61803	P61803	DAD1	Dolichyl-diphosphooligosaccharide--protein glycosyltransferase subunit DAD1	P61803	DAD1_HUMAN	2655.19	3815.21	5730.68
libDIA	P55854;P61956;Q6EEV6	P55854;P61956;Q6EEV6	SUMO3;SUMO2;SUMO4	Small ubiquitin-related modifier 3;Small ubiquitin-related modifier 2;Small ubiquitin-related modifier 4	P55854;P61956;Q6EEV6	SUMO3_HUMAN;SUMO2_HUMAN;SUMO4_HUMAN	54066.7	43539.7	40991.8			dirDIA	P61923	P61923	COPZ1	Coatomer subunit zeta-1	P61923	COPZ1_HUMAN	10553.6	10405.7	7323.43
libDIA	P55884	P55884	EIF3B	Eukaryotic translation initiation factor 3 subunit B	P55884	EIF3B_HUMAN	8575.83	9691.37	9649.16			dirDIA	P61960	P61960	UFM1	Ubiquitin-fold modifier 1	P61960	UFM1_HUMAN	6065.58	3052.87	4802.62
libDIA	P55957	P55957	BID	BH3-interacting domain death agonist	P55957	BID_HUMAN	15515.4	13793.4	9497.54			dirDIA	P61978	P61978	HNRNPK	Heterogeneous nuclear ribonucleoprotein K	P61978	HNRPK_HUMAN	108918	93850.8	80547.8
libDIA	P56134	P56134	ATP5J2	ATP synthase subunit f, mitochondrial	P56134	ATPK_HUMAN	Filtered	Filtered	4737.87			dirDIA	P61981	P61981	YWHAG	14-3-3 protein gamma	P61981	1433G_HUMAN	20576.6	12214.9	Filtered
libDIA	P56182	P56182	RRP1	Ribosomal RNA processing protein 1 homolog A	P56182	RRP1_HUMAN	92682.2	39404.6	Filtered			dirDIA	P62081	P62081	RPS7	40S ribosomal protein S7	P62081	RS7_HUMAN	32177.9	21775.1	19840.9
libDIA	P56192	P56192	MARS	Methionine--tRNA ligase, cytoplasmic	P56192	SYMC_HUMAN	8720.98	8357.14	5186.49			dirDIA	P62136	P62136	PPP1CA	Serine/threonine-protein phosphatase PP1-alpha catalytic subunit	P62136	PP1A_HUMAN	7860.31	6791.7	3008.09
libDIA	P56381;Q5VTU8	P56381;Q5VTU8	ATP5E;ATP5EP2	ATP synthase subunit epsilon, mitochondrial;ATP synthase subunit epsilon-like protein, mitochondrial	P56381;Q5VTU8	ATP5E_HUMAN;AT5EL_HUMAN	16667.2	15108.3	9909.83			dirDIA	P62158	P62158	CALM1	Calmodulin	P62158	CALM_HUMAN	29726.4	36644.5	24503.5
libDIA	P56385	P56385	ATP5I	ATP synthase subunit e, mitochondrial	P56385	ATP5I_HUMAN	35185.3	28014.7	22961			dirDIA	P62191	P62191	PSMC1	26S protease regulatory subunit 4	P62191	PRS4_HUMAN	2967.85	3596.44	3014.73
libDIA	P56537	P56537	EIF6	Eukaryotic translation initiation factor 6	P56537	IF6_HUMAN	Filtered	17908.3	18808.9			dirDIA	P62195	P62195	PSMC5	26S protease regulatory subunit 8	P62195	PRS8_HUMAN	3045.35	2165.03	2282.69
libDIA	P57721;Q15365;Q15366	P57721;Q15365;Q15366	PCBP3;PCBP1;PCBP2	Poly(rC)-binding protein 3;Poly(rC)-binding protein 1;Poly(rC)-binding protein 2	P57721;Q15365;Q15366	PCBP3_HUMAN;PCBP1_HUMAN;PCBP2_HUMAN	15275.1	17701.9	12940.5			dirDIA	P62241	P62241	RPS8	40S ribosomal protein S8	P62241	RS8_HUMAN	43801	51379	48121.3
libDIA	P59998	P59998	ARPC4	Actin-related protein 2/3 complex subunit 4	P59998	ARPC4_HUMAN	25311.6	24458.6	27182.8			dirDIA	P62244	P62244	RPS15A	40S ribosomal protein S15a	P62244	RS15A_HUMAN	15137.2	14861.7	15185.4
libDIA	P60174	P60174	TPI1	Triosephosphate isomerase	P60174	TPIS_HUMAN	20991.3	18036.8	9077.14			dirDIA	P62249	P62249	RPS16	40S ribosomal protein S16	P62249	RS16_HUMAN	76649.3	83341.2	83849
libDIA	P60228	P60228	EIF3E	Eukaryotic translation initiation factor 3 subunit E	P60228	EIF3E_HUMAN	Filtered	3547.74	2272.11			dirDIA	P62258	P62258	YWHAE	14-3-3 protein epsilon	P62258	1433E_HUMAN	19142.8	17741.9	12693.3
libDIA	P60660	P60660	MYL6	Myosin light polypeptide 6	P60660	MYL6_HUMAN	30250.4	21330.7	38567.4			dirDIA	P62263	P62263	RPS14	40S ribosomal protein S14	P62263	RS14_HUMAN	51728.6	47886.3	45309.6
libDIA	P60709;P63261	P60709;P63261	ACTB;ACTG1	Actin, cytoplasmic 1;Actin, cytoplasmic 2	P60709;P63261	ACTB_HUMAN;ACTG_HUMAN	872558	910576	479772			dirDIA	P62266	P62266	RPS23	40S ribosomal protein S23	P62266	RS23_HUMAN	17896.3	14073.6	29215.2
libDIA	P60842	P60842	EIF4A1	Eukaryotic initiation factor 4A-I	P60842	IF4A1_HUMAN	50559.2	50708	76805.4			dirDIA	P62269	P62269	RPS18	40S ribosomal protein S18	P62269	RS18_HUMAN	18421	17280.7	12570.4
libDIA	P60866	P60866	RPS20	40S ribosomal protein S20	P60866	RS20_HUMAN	27558.1	19286.7	12059.4			dirDIA	P62277	P62277	RPS13	40S ribosomal protein S13	P62277	RS13_HUMAN	66595.9	62312.7	61074.1
libDIA	P60900	P60900	PSMA6	Proteasome subunit alpha type-6	P60900	PSA6_HUMAN	23542	24835	23934.8			dirDIA	P62280	P62280	RPS11	40S ribosomal protein S11	P62280	RS11_HUMAN	7045.14	5048.92	4619.47
libDIA	P60981	P60981	DSTN	Destrin	P60981	DEST_HUMAN	Filtered	Filtered	2175.27			dirDIA	P62304	P62304	SNRPE	Small nuclear ribonucleoprotein E	P62304	RUXE_HUMAN	18912.2	12091.6	20310.9
libDIA	P61019	P61019	RAB2A	Ras-related protein Rab-2A	P61019	RAB2A_HUMAN	Filtered	Filtered	2715.23			dirDIA	P62310	P62310	LSM3	U6 snRNA-associated Sm-like protein LSm3	P62310	LSM3_HUMAN	21638.6	24084	31467
libDIA	P61086	P61086	UBE2K	Ubiquitin-conjugating enzyme E2 K	P61086	UBE2K_HUMAN	10362.7	8404.5	10342			dirDIA	P62314	P62314	SNRPD1	Small nuclear ribonucleoprotein Sm D1	P62314	SMD1_HUMAN	16818.8	16622.2	18291.1
libDIA	P61088;Q5JXB2	P61088;Q5JXB2	UBE2N;UBE2NL	Ubiquitin-conjugating enzyme E2 N;Putative ubiquitin-conjugating enzyme E2 N-like	P61088;Q5JXB2	UBE2N_HUMAN;UE2NL_HUMAN	81723	49910.5	64226.7			dirDIA	P62316	P62316	SNRPD2	Small nuclear ribonucleoprotein Sm D2	P62316	SMD2_HUMAN	83226.7	85835.4	60628.3
libDIA	P61106	P61106	RAB14	Ras-related protein Rab-14	P61106	RAB14_HUMAN	Filtered	Filtered	3849.9			dirDIA	P62318	P62318	SNRPD3	Small nuclear ribonucleoprotein Sm D3	P62318	SMD3_HUMAN	28593.2	32283.7	29687.7
libDIA	P61158	P61158	ACTR3	Actin-related protein 3	P61158	ARP3_HUMAN	Filtered	7109.53	5025.5			dirDIA	P62424	P62424	RPL7A	60S ribosomal protein L7a	P62424	RL7A_HUMAN	29373.7	32155.2	27889.7
libDIA	P61160	P61160	ACTR2	Actin-related protein 2	P61160	ARP2_HUMAN	18518.9	Filtered	11269.4			dirDIA	P62491;Q15907	P62491;Q15907	RAB11A;RAB11B	Ras-related protein Rab-11A;Ras-related protein Rab-11B	P62491;Q15907	RB11A_HUMAN;RB11B_HUMAN	33052.7	33668.7	26480.8
libDIA	P61204;P84077	P61204;P84077	ARF3;ARF1	ADP-ribosylation factor 3;ADP-ribosylation factor 1	P61204;P84077	ARF3_HUMAN;ARF1_HUMAN	53986.2	62896.9	38550.5			dirDIA	P62495	P62495	ETF1	Eukaryotic peptide chain release factor subunit 1	P62495	ERF1_HUMAN	7788.28	7265.77	7600.49
libDIA	P61221	P61221	ABCE1	ATP-binding cassette sub-family E member 1	P61221	ABCE1_HUMAN	Filtered	6697.03	7223.99			dirDIA	P62701	P62701	RPS4X	40S ribosomal protein S4, X isoform	P62701	RS4X_HUMAN	23918.4	23545.2	21632.8
libDIA	P61247	P61247	RPS3A	40S ribosomal protein S3a	P61247	RS3A_HUMAN	18390.5	17794.2	16191.2			dirDIA	P62736;P63267;P68032;P68133	P62736;P63267;P68032;P68133	ACTA2;ACTG2;ACTC1;ACTA1	Actin, aortic smooth muscle;Actin, gamma-enteric smooth muscle;Actin, alpha cardiac muscle 1;Actin, alpha skeletal muscle	P62736;P63267;P68032;P68133	ACTA_HUMAN;ACTH_HUMAN;ACTC_HUMAN;ACTS_HUMAN	4419.44	3051.99	10877.9
libDIA	P61254;Q9UNX3	P61254;Q9UNX3	RPL26;RPL26L1	60S ribosomal protein L26;60S ribosomal protein L26-like 1	P61254;Q9UNX3	RL26_HUMAN;RL26L_HUMAN	90489.3	86501.9	76846.8			dirDIA	P62750	P62750	RPL23A	60S ribosomal protein L23a	P62750	RL23A_HUMAN	29582.2	44680.8	28395
libDIA	P61289	P61289	PSME3	Proteasome activator complex subunit 3	P61289	PSME3_HUMAN	Filtered	Filtered	2660.74			dirDIA	P62753	P62753	RPS6	40S ribosomal protein S6	P62753	RS6_HUMAN	60222	82365.8	127649
libDIA	P61313	P61313	RPL15	60S ribosomal protein L15	P61313	RL15_HUMAN	Filtered	21835.5	3724.18			dirDIA	P62805	P62805	HIST1H4A	Histone H4	P62805	H4_HUMAN	763670	658690	575512
libDIA	P61326;Q96A72	P61326;Q96A72	MAGOH;MAGOHB	Protein mago nashi homolog;Protein mago nashi homolog 2	P61326;Q96A72	MGN_HUMAN;MGN2_HUMAN	11836	10617.3	8172.6			dirDIA	P62826	P62826	RAN	GTP-binding nuclear protein Ran	P62826	RAN_HUMAN	110957	93352.5	77186.5
libDIA	P61353	P61353	RPL27	60S ribosomal protein L27	P61353	RL27_HUMAN	19694	51377.9	26583.4			dirDIA	P62829	P62829	RPL23	60S ribosomal protein L23	P62829	RL23_HUMAN	13304.1	18789	18159.6
libDIA	P61604	P61604	HSPE1	10 kDa heat shock protein, mitochondrial	P61604	CH10_HUMAN	193681	186829	174084			dirDIA	P62834	P62834	RAP1A	Ras-related protein Rap-1A	P62834	RAP1A_HUMAN	27470.2	24877.6	17640.6
libDIA	P61626	P61626	LYZ	Lysozyme C	P61626	LYSC_HUMAN	Filtered	Filtered	5084.81			dirDIA	P62847	P62847	RPS24	40S ribosomal protein S24	P62847	RS24_HUMAN	Filtered	Filtered	4019.45
libDIA	P61803	P61803	DAD1	Dolichyl-diphosphooligosaccharide--protein glycosyltransferase subunit DAD1	P61803	DAD1_HUMAN	3528.61	Filtered	7791.36			dirDIA	P62851	P62851	RPS25	40S ribosomal protein S25	P62851	RS25_HUMAN	97704.4	98815.5	79839.2
libDIA	P61923	P61923	COPZ1	Coatomer subunit zeta-1	P61923	COPZ1_HUMAN	10483.8	11070.2	8378.81			dirDIA	P62854;Q5JNZ5	P62854;Q5JNZ5	RPS26;RPS26P11	40S ribosomal protein S26;Putative 40S ribosomal protein S26-like 1	P62854;Q5JNZ5	RS26_HUMAN;RS26L_HUMAN	59054.5	51516.9	Filtered
libDIA	P61978	P61978	HNRNPK	Heterogeneous nuclear ribonucleoprotein K	P61978	HNRPK_HUMAN	68180.2	86014.2	71829.9			dirDIA	P62857	P62857	RPS28	40S ribosomal protein S28	P62857	RS28_HUMAN	60017.4	40697.1	56450.6
libDIA	P61981	P61981	YWHAG	14-3-3 protein gamma	P61981	1433G_HUMAN	20789.5	12170.2	8566.73			dirDIA	P62861	P62861	FAU	40S ribosomal protein S30	P62861	RS30_HUMAN	42100.3	37303.6	65463.1
libDIA	P62081	P62081	RPS7	40S ribosomal protein S7	P62081	RS7_HUMAN	40624.3	49216.1	28188.9			dirDIA	P62888	P62888	RPL30	60S ribosomal protein L30	P62888	RL30_HUMAN	1	1.13909	1260.06
libDIA	P62136	P62136	PPP1CA	Serine/threonine-protein phosphatase PP1-alpha catalytic subunit	P62136	PP1A_HUMAN	8445.22	Filtered	4724.25			dirDIA	P62899	P62899	RPL31	60S ribosomal protein L31	P62899	RL31_HUMAN	53097.6	46191.9	Filtered
libDIA	P62158	P62158	CALM1	Calmodulin	P62158	CALM_HUMAN	45386.8	74190.2	43298.7			dirDIA	P62906	P62906	RPL10A	60S ribosomal protein L10a	P62906	RL10A_HUMAN	67596.8	52557.2	47008.8
libDIA	P62191	P62191	PSMC1	26S protease regulatory subunit 4	P62191	PRS4_HUMAN	Filtered	Filtered	3951.92			dirDIA	P62910	P62910	RPL32	60S ribosomal protein L32	P62910	RL32_HUMAN	4368.65	8286.82	8672.9
libDIA	P62195	P62195	PSMC5	26S protease regulatory subunit 8	P62195	PRS8_HUMAN	4246.04	2764.6	4664.33			dirDIA	P62913	P62913	RPL11	60S ribosomal protein L11	P62913	RL11_HUMAN	55416.6	65385.3	58532.1
libDIA	P62241	P62241	RPS8	40S ribosomal protein S8	P62241	RS8_HUMAN	39023.3	41133.9	41194			dirDIA	P62917	P62917	RPL8	60S ribosomal protein L8	P62917	RL8_HUMAN	11399.5	13143.4	1419.25
libDIA	P62244	P62244	RPS15A	40S ribosomal protein S15a	P62244	RS15A_HUMAN	68874.9	55003.2	34547.5			dirDIA	P62937	P62937	PPIA	Peptidyl-prolyl cis-trans isomerase A	P62937	PPIA_HUMAN	385206	377833	482018
libDIA	P62249	P62249	RPS16	40S ribosomal protein S16	P62249	RS16_HUMAN	85462.5	93326.6	99329.4			dirDIA	P62942	P62942	FKBP1A	Peptidyl-prolyl cis-trans isomerase FKBP1A	P62942	FKB1A_HUMAN	32453.7	27472.2	456.98
libDIA	P62258	P62258	YWHAE	14-3-3 protein epsilon	P62258	1433E_HUMAN	80929.9	74944.1	63849.8			dirDIA	P62993	P62993	GRB2	Growth factor receptor-bound protein 2	P62993	GRB2_HUMAN	4904.7	1858.26	2062.58
libDIA	P62263	P62263	RPS14	40S ribosomal protein S14	P62263	RS14_HUMAN	53747	50189.5	48854.4			dirDIA	P63000	P63000	RAC1	Ras-related C3 botulinum toxin substrate 1	P63000	RAC1_HUMAN	2817.13	4771.16	6083.06
libDIA	P62266	P62266	RPS23	40S ribosomal protein S23	P62266	RS23_HUMAN	16144.8	12707.9	25602.8			dirDIA	P63104	P63104	YWHAZ	14-3-3 protein zeta/delta	P63104	1433Z_HUMAN	38143.7	47604.5	26437.3
libDIA	P62269	P62269	RPS18	40S ribosomal protein S18	P62269	RS18_HUMAN	23433.2	21587.8	19705			dirDIA	P63165	P63165	SUMO1	Small ubiquitin-related modifier 1	P63165	SUMO1_HUMAN	10625.9	8705	7286.08
libDIA	P62277	P62277	RPS13	40S ribosomal protein S13	P62277	RS13_HUMAN	69795.5	64745.1	56001.3			dirDIA	P63173	P63173	RPL38	60S ribosomal protein L38	P63173	RL38_HUMAN	17634.9	16446.6	26858.7
libDIA	P62280	P62280	RPS11	40S ribosomal protein S11	P62280	RS11_HUMAN	7360.44	4380.42	9183.15			dirDIA	P63208	P63208	SKP1	S-phase kinase-associated protein 1	P63208	SKP1_HUMAN	5381.51	5763.61	101.92
libDIA	P62304	P62304	SNRPE	Small nuclear ribonucleoprotein E	P62304	RUXE_HUMAN	21580	11312.8	20941.2			dirDIA	P63220	P63220	RPS21	40S ribosomal protein S21	P63220	RS21_HUMAN	6827.95	6572.93	Filtered
libDIA	P62310	P62310	LSM3	U6 snRNA-associated Sm-like protein LSm3	P62310	LSM3_HUMAN	21864	23974.6	17319.4			dirDIA	P63241	P63241	EIF5A	Eukaryotic translation initiation factor 5A-1	P63241	IF5A1_HUMAN	9680.78	5872.19	11626.3
libDIA	P62312	P62312	LSM6	U6 snRNA-associated Sm-like protein LSm6	P62312	LSM6_HUMAN	Filtered	Filtered	3817.8			dirDIA	P63244	P63244	GNB2L1	Guanine nucleotide-binding protein subunit beta-2-like 1	P63244	GBLP_HUMAN	37554.9	37940.5	58777.2
libDIA	P62314	P62314	SNRPD1	Small nuclear ribonucleoprotein Sm D1	P62314	SMD1_HUMAN	26058.8	16940.9	20747.3			dirDIA	P67936	P67936	TPM4	Tropomyosin alpha-4 chain	P67936	TPM4_HUMAN	36324.6	57328.2	50819
libDIA	P62316	P62316	SNRPD2	Small nuclear ribonucleoprotein Sm D2	P62316	SMD2_HUMAN	87846.5	88574.6	34354.2			dirDIA	P68104	P68104	EEF1A1	Elongation factor 1-alpha 1	P68104	EF1A1_HUMAN	968731	971440	765171
libDIA	P62318	P62318	SNRPD3	Small nuclear ribonucleoprotein Sm D3	P62318	SMD3_HUMAN	48554.4	57796.9	32908			dirDIA	P68363;Q71U36;Q9BQE3	P68363;Q71U36;Q9BQE3	TUBA1B;TUBA1A;TUBA1C	Tubulin alpha-1B chain;Tubulin alpha-1A chain;Tubulin alpha-1C chain	P68363;Q71U36;Q9BQE3	TBA1B_HUMAN;TBA1A_HUMAN;TBA1C_HUMAN	129253	109187	83113.4
libDIA	P62328;P63313	P62328;P63313	TMSB4X;TMSB10	Thymosin beta-4;Thymosin beta-10	P62328;P63313	TYB4_HUMAN;TYB10_HUMAN	21732	16368.1	5884.21			dirDIA	P68366	P68366	TUBA4A	Tubulin alpha-4A chain	P68366	TBA4A_HUMAN	33744	34911.8	28365
libDIA	P62333	P62333	PSMC6	26S protease regulatory subunit 10B	P62333	PRS10_HUMAN	Filtered	Filtered	3529.11			dirDIA	P68371	P68371	TUBB4B	Tubulin beta-4B chain	P68371	TBB4B_HUMAN	196212	195245	207775
libDIA	P62424	P62424	RPL7A	60S ribosomal protein L7a	P62424	RL7A_HUMAN	26352.3	24925.3	25499			dirDIA	P68400	P68400	CSNK2A1	Casein kinase II subunit alpha	P68400	CSK21_HUMAN	1.17542	1	925.67
libDIA	P62491;Q15907	P62491;Q15907	RAB11A;RAB11B	Ras-related protein Rab-11A;Ras-related protein Rab-11B	P62491;Q15907	RB11A_HUMAN;RB11B_HUMAN	38062.5	37056	31408			dirDIA	P68431;P84243;Q16695;Q6NXT2;Q71DI3	P68431;P84243;Q16695;Q6NXT2;Q71DI3	HIST1H3A;H3F3A;HIST3H3;H3F3C;HIST2H3A	Histone H3.1;Histone H3.3;Histone H3.1t;Histone H3.3C;Histone H3.2	P68431;P84243;Q16695;Q6NXT2;Q71DI3	H31_HUMAN;H33_HUMAN;H31T_HUMAN;H3C_HUMAN;H32_HUMAN	1.13153e+06	1.00187e+06	764907
libDIA	P62495	P62495	ETF1	Eukaryotic peptide chain release factor subunit 1	P62495	ERF1_HUMAN	8886.18	12891.9	10696.5			dirDIA	P69905	P69905	HBA1	Hemoglobin subunit alpha	P69905	HBA_HUMAN	27267.5	22667.5	37192.6
libDIA	P62701	P62701	RPS4X	40S ribosomal protein S4, X isoform	P62701	RS4X_HUMAN	26512.5	26454	27308.4			dirDIA	P78347	P78347	GTF2I	General transcription factor II-I	P78347	GTF2I_HUMAN	3779.79	4122.47	3794.28
libDIA	P62736;P63267;P68032;P68133	P62736;P63267;P68032;P68133	ACTA2;ACTG2;ACTC1;ACTA1	Actin, aortic smooth muscle;Actin, gamma-enteric smooth muscle;Actin, alpha cardiac muscle 1;Actin, alpha skeletal muscle	P62736;P63267;P68032;P68133	ACTA_HUMAN;ACTH_HUMAN;ACTC_HUMAN;ACTS_HUMAN	5773.38	3568.67	13142.4			dirDIA	P78371	P78371	CCT2	T-complex protein 1 subunit beta	P78371	TCPB_HUMAN	15755.4	18566.3	17815.8
libDIA	P62750	P62750	RPL23A	60S ribosomal protein L23a	P62750	RL23A_HUMAN	25924.5	35496	24768.9			dirDIA	P78395	P78395	PRAME	Melanoma antigen preferentially expressed in tumors	P78395	PRAME_HUMAN	41146.1	41074.8	48555
libDIA	P62753	P62753	RPS6	40S ribosomal protein S6	P62753	RS6_HUMAN	63361.9	86260.4	135376			dirDIA	P78417	P78417	GSTO1	Glutathione S-transferase omega-1	P78417	GSTO1_HUMAN	6769.25	7152.25	6430.25
libDIA	P62805	P62805	HIST1H4A	Histone H4	P62805	H4_HUMAN	756525	634890	693642			dirDIA	P78527	P78527	PRKDC	DNA-dependent protein kinase catalytic subunit	P78527	PRKDC_HUMAN	12176	15702.4	12410
libDIA	P62820;Q9H0U4	P62820;Q9H0U4	RAB1A;RAB1B	Ras-related protein Rab-1A;Ras-related protein Rab-1B	P62820;Q9H0U4	RAB1A_HUMAN;RAB1B_HUMAN	Filtered	7013.01	Filtered			dirDIA	P81605	P81605	DCD	Dermcidin	P81605	DCD_HUMAN	24723	43039.8	18313.9
libDIA	P62826	P62826	RAN	GTP-binding nuclear protein Ran	P62826	RAN_HUMAN	113937	94565.7	81115.2			dirDIA	P82979	P82979	SARNP	SAP domain-containing ribonucleoprotein	P82979	SARNP_HUMAN	10853.8	11102	8822.13
libDIA	P62829	P62829	RPL23	60S ribosomal protein L23	P62829	RL23_HUMAN	15413.7	22180.7	15491.2			dirDIA	P83731	P83731	RPL24	60S ribosomal protein L24	P83731	RL24_HUMAN	12052	10619.8	13137.2
libDIA	P62834	P62834	RAP1A	Ras-related protein Rap-1A	P62834	RAP1A_HUMAN	44856.4	38561.9	20586.6			dirDIA	P84098	P84098	RPL19	60S ribosomal protein L19	P84098	RL19_HUMAN	1861.93	9188.82	2017.53
libDIA	P62847	P62847	RPS24	40S ribosomal protein S24	P62847	RS24_HUMAN	Filtered	Filtered	4739.72			dirDIA	P84103	P84103	SRSF3	Serine/arginine-rich splicing factor 3	P84103	SRSF3_HUMAN	33063.9	42480	41125.8
libDIA	P62851	P62851	RPS25	40S ribosomal protein S25	P62851	RS25_HUMAN	98508	98519.7	82328.9			dirDIA	Q00325	Q00325	SLC25A3	Phosphate carrier protein, mitochondrial	Q00325	MPCP_HUMAN	14028.4	21376.9	2275.07
libDIA	P62854;Q5JNZ5	P62854;Q5JNZ5	RPS26;RPS26P11	40S ribosomal protein S26;Putative 40S ribosomal protein S26-like 1	P62854;Q5JNZ5	RS26_HUMAN;RS26L_HUMAN	57890.8	49468.9	Filtered			dirDIA	Q00610	Q00610	CLTC	Clathrin heavy chain 1	Q00610	CLH1_HUMAN	17418.5	15401.4	21766.2
libDIA	P62857	P62857	RPS28	40S ribosomal protein S28	P62857	RS28_HUMAN	61853.7	40517.4	58684.3			dirDIA	Q00839	Q00839	HNRNPU	Heterogeneous nuclear ribonucleoprotein U	Q00839	HNRPU_HUMAN	27650.2	27485.8	19912.1
libDIA	P62861	P62861	FAU	40S ribosomal protein S30	P62861	RS30_HUMAN	48719.5	42537.6	39300.6			dirDIA	Q01082	Q01082	SPTBN1	Spectrin beta chain, non-erythrocytic 1	Q01082	SPTB2_HUMAN	5529.15	7135.41	3446.61
libDIA	P62888	P62888	RPL30	60S ribosomal protein L30	P62888	RL30_HUMAN	Filtered	Filtered	2428.09			dirDIA	Q01105	Q01105	SET	Protein SET	Q01105	SET_HUMAN	52215.4	66032.5	57117.4
libDIA	P62899	P62899	RPL31	60S ribosomal protein L31	P62899	RL31_HUMAN	61546.8	51226.8	5476.5			dirDIA	Q01130;Q9BRL6	Q01130;Q9BRL6	SRSF2;SRSF8	Serine/arginine-rich splicing factor 2;Serine/arginine-rich splicing factor 8	Q01130;Q9BRL6	SRSF2_HUMAN;SRSF8_HUMAN	36670.4	31102.5	19422.3
libDIA	P62906	P62906	RPL10A	60S ribosomal protein L10a	P62906	RL10A_HUMAN	12133.1	8942.09	6460.98			dirDIA	Q01469	Q01469	FABP5	Fatty acid-binding protein, epidermal	Q01469	FABP5_HUMAN	74365.7	120502	100821
libDIA	P62910	P62910	RPL32	60S ribosomal protein L32	P62910	RL32_HUMAN	Filtered	Filtered	7809.72			dirDIA	Q01518	Q01518	CAP1	Adenylyl cyclase-associated protein 1	Q01518	CAP1_HUMAN	7145.21	4910.33	5943.31
libDIA	P62913	P62913	RPL11	60S ribosomal protein L11	P62913	RL11_HUMAN	71076.8	78803.7	63468.8			dirDIA	Q01813	Q01813	PFKP	ATP-dependent 6-phosphofructokinase, platelet type	Q01813	PFKAP_HUMAN	2719.98	5320.21	5508.66
libDIA	P62917	P62917	RPL8	60S ribosomal protein L8	P62917	RL8_HUMAN	19648.9	18918.3	2145.06			dirDIA	Q02218	Q02218	OGDH	2-oxoglutarate dehydrogenase, mitochondrial	Q02218	ODO1_HUMAN	3344.81	3126.28	3486.73
libDIA	P62937	P62937	PPIA	Peptidyl-prolyl cis-trans isomerase A	P62937	PPIA_HUMAN	389155	376123	334032			dirDIA	Q02413	Q02413	DSG1	Desmoglein-1	Q02413	DSG1_HUMAN	288.892	1	8393.31
libDIA	P62942	P62942	FKBP1A	Peptidyl-prolyl cis-trans isomerase FKBP1A	P62942	FKB1A_HUMAN	32798.5	27505.3	Filtered			dirDIA	Q02790	Q02790	FKBP4	Peptidyl-prolyl cis-trans isomerase FKBP4	Q02790	FKBP4_HUMAN	26003.3	39713.7	22776.2
libDIA	P62993	P62993	GRB2	Growth factor receptor-bound protein 2	P62993	GRB2_HUMAN	8575.49	58157.9	5204.33			dirDIA	Q02878	Q02878	RPL6	60S ribosomal protein L6	Q02878	RL6_HUMAN	13052.1	10391.6	13540.4
libDIA	P62995	P62995	TRA2B	Transformer-2 protein homolog beta	P62995	TRA2B_HUMAN	3302.57	Filtered	Filtered			dirDIA	Q03252	Q03252	LMNB2	Lamin-B2	Q03252	LMNB2_HUMAN	7885.37	9171.14	9050.15
libDIA	P63000	P63000	RAC1	Ras-related C3 botulinum toxin substrate 1	P63000	RAC1_HUMAN	75660.3	40764.9	28131.6			dirDIA	Q03518	Q03518	TAP1	Antigen peptide transporter 1	Q03518	TAP1_HUMAN	370.27	2532.35	2014.62
libDIA	P63104	P63104	YWHAZ	14-3-3 protein zeta/delta	P63104	1433Z_HUMAN	38076	46019.1	28304.6			dirDIA	Q04323	Q04323	UBXN1	UBX domain-containing protein 1	Q04323	UBXN1_HUMAN	3420.46	6221.49	6884.45
libDIA	P63165	P63165	SUMO1	Small ubiquitin-related modifier 1	P63165	SUMO1_HUMAN	19655.7	Filtered	17072.4			dirDIA	Q04695	Q04695	KRT17	Keratin, type I cytoskeletal 17	Q04695	K1C17_HUMAN	4494.67	10021.2	6061.32
libDIA	P63173	P63173	RPL38	60S ribosomal protein L38	P63173	RL38_HUMAN	63109.1	42201.1	43308.1			dirDIA	Q04760	Q04760	GLO1	Lactoylglutathione lyase	Q04760	LGUL_HUMAN	2928.22	2786.88	3243.33
libDIA	P63208	P63208	SKP1	S-phase kinase-associated protein 1	P63208	SKP1_HUMAN	7640.97	8013.84	Filtered			dirDIA	Q04917	Q04917	YWHAH	14-3-3 protein eta	Q04917	1433F_HUMAN	73949.6	70525.6	56844.4
libDIA	P63220	P63220	RPS21	40S ribosomal protein S21	P63220	RS21_HUMAN	10374	9665.87	1737.06			dirDIA	Q06323	Q06323	PSME1	Proteasome activator complex subunit 1	Q06323	PSME1_HUMAN	56513.4	60403.5	62053.9
libDIA	P63241	P63241	EIF5A	Eukaryotic translation initiation factor 5A-1	P63241	IF5A1_HUMAN	11374.3	18561.8	13034.6			dirDIA	Q06830	Q06830	PRDX1	Peroxiredoxin-1	Q06830	PRDX1_HUMAN	194439	243157	226833
libDIA	P63244	P63244	GNB2L1	Guanine nucleotide-binding protein subunit beta-2-like 1	P63244	GBLP_HUMAN	40878.2	38637.8	36269.8			dirDIA	Q07020	Q07020	RPL18	60S ribosomal protein L18	Q07020	RL18_HUMAN	46477.1	89786.2	64529.8
libDIA	P67812	P67812	SEC11A	Signal peptidase complex catalytic subunit SEC11A	P67812	SC11A_HUMAN	Filtered	Filtered	5146.76			dirDIA	Q07021	Q07021	C1QBP	Complement component 1 Q subcomponent-binding protein, mitochondrial	Q07021	C1QBP_HUMAN	6135.5	234.973	2897.25
libDIA	P68104	P68104	EEF1A1	Elongation factor 1-alpha 1	P68104	EF1A1_HUMAN	973964	963101	790815			dirDIA	Q07666	Q07666	KHDRBS1	KH domain-containing, RNA-binding, signal transduction-associated protein 1	Q07666	KHDR1_HUMAN	15053.9	12876.8	6209.45
libDIA	P68363;Q71U36;Q9BQE3	P68363;Q71U36;Q9BQE3	TUBA1B;TUBA1A;TUBA1C	Tubulin alpha-1B chain;Tubulin alpha-1A chain;Tubulin alpha-1C chain	P68363;Q71U36;Q9BQE3	TBA1B_HUMAN;TBA1A_HUMAN;TBA1C_HUMAN	124308	136769	87148.4			dirDIA	Q07955	Q07955	SRSF1	Serine/arginine-rich splicing factor 1	Q07955	SRSF1_HUMAN	42589.4	39362.4	23344.6
libDIA	P68366	P68366	TUBA4A	Tubulin alpha-4A chain	P68366	TBA4A_HUMAN	36087.6	36474.2	20906			dirDIA	Q08188	Q08188	TGM3	Protein-glutamine gamma-glutamyltransferase E	Q08188	TGM3_HUMAN	2034.93	1885.33	16135.9
libDIA	P68371	P68371	TUBB4B	Tubulin beta-4B chain	P68371	TBB4B_HUMAN	46561.3	38033.1	33498.5			dirDIA	Q08211	Q08211	DHX9	ATP-dependent RNA helicase A	Q08211	DHX9_HUMAN	15003.4	14542.4	18390.7
libDIA	P68431;P84243;Q16695;Q71DI3	P68431;P84243;Q16695;Q71DI3	HIST1H3A;H3F3A;HIST3H3;HIST2H3A	Histone H3.1;Histone H3.3;Histone H3.1t;Histone H3.2	P68431;P84243;Q16695;Q71DI3	H31_HUMAN;H33_HUMAN;H31T_HUMAN;H32_HUMAN	814483	709936	534391			dirDIA	Q08257	Q08257	CRYZ	Quinone oxidoreductase	Q08257	QOR_HUMAN	2592.63	3809.93	3143.37
libDIA	P69905	P69905	HBA1	Hemoglobin subunit alpha	P69905	HBA_HUMAN	45984.9	38422.3	39949.6			dirDIA	Q08722	Q08722	CD47	Leukocyte surface antigen CD47	Q08722	CD47_HUMAN	5160.07	5420.18	3916.66
libDIA	P78347	P78347	GTF2I	General transcription factor II-I	P78347	GTF2I_HUMAN	7849.9	6468	3791.66			dirDIA	Q08945	Q08945	SSRP1	FACT complex subunit SSRP1	Q08945	SSRP1_HUMAN	5513.78	8014.23	9151.81
libDIA	P78371	P78371	CCT2	T-complex protein 1 subunit beta	P78371	TCPB_HUMAN	26197.8	29898.2	27256.7			dirDIA	Q09028	Q09028	RBBP4	Histone-binding protein RBBP4	Q09028	RBBP4_HUMAN	19930.3	17583.1	19250.3
libDIA	P78417	P78417	GSTO1	Glutathione S-transferase omega-1	P78417	GSTO1_HUMAN	7930.79	11276.3	7246.2			dirDIA	Q10567	Q10567	AP1B1	AP-1 complex subunit beta-1	Q10567	AP1B1_HUMAN	114.74	589.069	1098.63
libDIA	P78527	P78527	PRKDC	DNA-dependent protein kinase catalytic subunit	P78527	PRKDC_HUMAN	10701.5	12214.2	11015.6			dirDIA	Q12904	Q12904	AIMP1	Aminoacyl tRNA synthase complex-interacting multifunctional protein 1	Q12904	AIMP1_HUMAN	2437.69	4220.15	4762.02
libDIA	P81605	P81605	DCD	Dermcidin	P81605	DCD_HUMAN	24887.5	59371.6	18960.7			dirDIA	Q12905	Q12905	ILF2	Interleukin enhancer-binding factor 2	Q12905	ILF2_HUMAN	23501.2	25178.4	29211.1
libDIA	P82650	P82650	MRPS22	28S ribosomal protein S22, mitochondrial	P82650	RT22_HUMAN	Filtered	Filtered	1875.67			dirDIA	Q12906	Q12906	ILF3	Interleukin enhancer-binding factor 3	Q12906	ILF3_HUMAN	13249.2	14557.9	11392.2
libDIA	P82979	P82979	SARNP	SAP domain-containing ribonucleoprotein	P82979	SARNP_HUMAN	12256.1	10049	10840.9			dirDIA	Q12907	Q12907	LMAN2	Vesicular integral-membrane protein VIP36	Q12907	LMAN2_HUMAN	5620.74	10787.5	11473
libDIA	P83731	P83731	RPL24	60S ribosomal protein L24	P83731	RL24_HUMAN	14638.2	12823.6	20153.8			dirDIA	Q12931	Q12931	TRAP1	Heat shock protein 75 kDa, mitochondrial	Q12931	TRAP1_HUMAN	16930.3	17179.5	17314.3
libDIA	P84095	P84095	RHOG	Rho-related GTP-binding protein RhoG	P84095	RHOG_HUMAN	2659.19	1406.64	Filtered			dirDIA	Q13011	Q13011	ECH1	Delta(3,5)-Delta(2,4)-dienoyl-CoA isomerase, mitochondrial	Q13011	ECH1_HUMAN	6479.3	5379.74	6575.07
libDIA	P84098	P84098	RPL19	60S ribosomal protein L19	P84098	RL19_HUMAN	Filtered	8903.96	Filtered			dirDIA	Q13162	Q13162	PRDX4	Peroxiredoxin-4	Q13162	PRDX4_HUMAN	4533.75	4417.83	7227.79
libDIA	P84103	P84103	SRSF3	Serine/arginine-rich splicing factor 3	P84103	SRSF3_HUMAN	62107.6	82743.6	87912.6			dirDIA	Q13185	Q13185	CBX3	Chromobox protein homolog 3	Q13185	CBX3_HUMAN	14469.4	12277.9	10242.4
libDIA	P99999	P99999	CYCS	Cytochrome c	P99999	CYC_HUMAN	Filtered	Filtered	6549.59			dirDIA	Q13242	Q13242	SRSF9	Serine/arginine-rich splicing factor 9	Q13242	SRSF9_HUMAN	9986.8	17000.5	17697.7
libDIA	Q00059	Q00059	TFAM	Transcription factor A, mitochondrial	Q00059	TFAM_HUMAN	6130.6	6176.94	2937.04			dirDIA	Q13247	Q13247	SRSF6	Serine/arginine-rich splicing factor 6	Q13247	SRSF6_HUMAN	58363	51866.8	38365.5
libDIA	Q00325	Q00325	SLC25A3	Phosphate carrier protein, mitochondrial	Q00325	MPCP_HUMAN	26981.9	21780.2	2393.58			dirDIA	Q13263	Q13263	TRIM28	Transcription intermediary factor 1-beta	Q13263	TIF1B_HUMAN	9090.91	12594.8	7344.27
libDIA	Q00341	Q00341	HDLBP	Vigilin	Q00341	VIGLN_HUMAN	Filtered	Filtered	4251.57			dirDIA	Q13283	Q13283	G3BP1	Ras GTPase-activating protein-binding protein 1	Q13283	G3BP1_HUMAN	6168.8	3245.66	5713.4
libDIA	Q00610	Q00610	CLTC	Clathrin heavy chain 1	Q00610	CLH1_HUMAN	18140.1	14675.7	18985			dirDIA	Q13404	Q13404	UBE2V1	Ubiquitin-conjugating enzyme E2 variant 1	Q13404	UB2V1_HUMAN	28821.2	29537.1	20285.7
libDIA	Q00765	Q00765	REEP5	Receptor expression-enhancing protein 5	Q00765	REEP5_HUMAN	Filtered	Filtered	2777.07			dirDIA	Q13405	Q13405	MRPL49	39S ribosomal protein L49, mitochondrial	Q13405	RM49_HUMAN	3549.14	3429.33	3856.1
libDIA	Q00839	Q00839	HNRNPU	Heterogeneous nuclear ribonucleoprotein U	Q00839	HNRPU_HUMAN	25888.1	24625	26840.7			dirDIA	Q13428	Q13428	TCOF1	Treacle protein	Q13428	TCOF_HUMAN	1686.16	4704.09	6221.11
libDIA	Q01081	Q01081	U2AF1	Splicing factor U2AF 35 kDa subunit	Q01081	U2AF1_HUMAN	21948.7	21112.1	Filtered			dirDIA	Q13435	Q13435	SF3B2	Splicing factor 3B subunit 2	Q13435	SF3B2_HUMAN	11763.3	8693.11	5920.72
libDIA	Q01082	Q01082	SPTBN1	Spectrin beta chain, non-erythrocytic 1	Q01082	SPTB2_HUMAN	9573.91	10293.6	6789.68			dirDIA	Q13442	Q13442	PDAP1	28 kDa heat- and acid-stable phosphoprotein	Q13442	HAP28_HUMAN	10064.2	9026.94	16294.3
libDIA	Q01105	Q01105	SET	Protein SET	Q01105	SET_HUMAN	49112.4	62814.5	52230.2			dirDIA	Q13595	Q13595	TRA2A	Transformer-2 protein homolog alpha	Q13595	TRA2A_HUMAN	2189.81	939.993	6390.57
libDIA	Q01130;Q9BRL6	Q01130;Q9BRL6	SRSF2;SRSF8	Serine/arginine-rich splicing factor 2;Serine/arginine-rich splicing factor 8	Q01130;Q9BRL6	SRSF2_HUMAN;SRSF8_HUMAN	38579.3	32843.1	22153.1			dirDIA	Q13813	Q13813	SPTAN1	Spectrin alpha chain, non-erythrocytic 1	Q13813	SPTN1_HUMAN	5813.9	6161.13	5208.25
libDIA	Q01469	Q01469	FABP5	Fatty acid-binding protein, epidermal	Q01469	FABP5_HUMAN	81613.4	127620	111474			dirDIA	Q13867	Q13867	BLMH	Bleomycin hydrolase	Q13867	BLMH_HUMAN	4697.19	4543.84	5776.72
libDIA	Q01518	Q01518	CAP1	Adenylyl cyclase-associated protein 1	Q01518	CAP1_HUMAN	22916.7	40174.3	16452.3			dirDIA	Q13868	Q13868	EXOSC2	Exosome complex component RRP4	Q13868	EXOS2_HUMAN	1511.73	2173.62	3560.8
libDIA	Q01813	Q01813	PFKP	ATP-dependent 6-phosphofructokinase, platelet type	Q01813	PFKAP_HUMAN	Filtered	Filtered	4424.62			dirDIA	Q14005	Q14005	IL16	Pro-interleukin-16	Q14005	IL16_HUMAN	2963.38	1163.13	3533.87
libDIA	Q01844	Q01844	EWSR1	RNA-binding protein EWS	Q01844	EWS_HUMAN	4750.56	Filtered	Filtered			dirDIA	Q14008	Q14008	CKAP5	Cytoskeleton-associated protein 5	Q14008	CKAP5_HUMAN	1598.95	2350.98	2305.74
libDIA	Q02790	Q02790	FKBP4	Peptidyl-prolyl cis-trans isomerase FKBP4	Q02790	FKBP4_HUMAN	26557.1	38978.3	14817.8			dirDIA	Q14011	Q14011	CIRBP	Cold-inducible RNA-binding protein	Q14011	CIRBP_HUMAN	4854.98	5698.83	4746.11
libDIA	Q02878	Q02878	RPL6	60S ribosomal protein L6	Q02878	RL6_HUMAN	37324.7	31231.9	21499.3			dirDIA	Q14019	Q14019	COTL1	Coactosin-like protein	Q14019	COTL1_HUMAN	10658.1	9029.19	5376.63
libDIA	Q03252	Q03252	LMNB2	Lamin-B2	Q03252	LMNB2_HUMAN	9276.62	13904.8	9642.87			dirDIA	Q14103	Q14103	HNRNPD	Heterogeneous nuclear ribonucleoprotein D0	Q14103	HNRPD_HUMAN	106306	171560	132405
libDIA	Q04323	Q04323	UBXN1	UBX domain-containing protein 1	Q04323	UBXN1_HUMAN	Filtered	6228.4	7599.61			dirDIA	Q14152	Q14152	EIF3A	Eukaryotic translation initiation factor 3 subunit A	Q14152	EIF3A_HUMAN	6637.75	6618.11	11698.7
libDIA	Q04637	Q04637	EIF4G1	Eukaryotic translation initiation factor 4 gamma 1	Q04637	IF4G1_HUMAN	Filtered	2.04491e+06	10969.3			dirDIA	Q14165	Q14165	MLEC	Malectin	Q14165	MLEC_HUMAN	2433.07	3203.13	2667.61
libDIA	Q04760	Q04760	GLO1	Lactoylglutathione lyase	Q04760	LGUL_HUMAN	32395	29943	13243.5			dirDIA	Q14166	Q14166	TTLL12	Tubulin--tyrosine ligase-like protein 12	Q14166	TTL12_HUMAN	Filtered	1384.91	4067.27
libDIA	Q04917	Q04917	YWHAH	14-3-3 protein eta	Q04917	1433F_HUMAN	11960.7	19243.3	15504.1			dirDIA	Q14444	Q14444	CAPRIN1	Caprin-1	Q14444	CAPR1_HUMAN	1826.68	3787.74	3419.89
libDIA	Q05655	Q05655	PRKCD	Protein kinase C delta type	Q05655	KPCD_HUMAN	Filtered	Filtered	1709.21			dirDIA	Q14498	Q14498	RBM39	RNA-binding protein 39	Q14498	RBM39_HUMAN	2627.03	1644.32	5593.78
libDIA	Q06203	Q06203	PPAT	Amidophosphoribosyltransferase	Q06203	PUR1_HUMAN	9893.11	Filtered	107875			dirDIA	Q14525	Q14525	KRT33B	Keratin, type I cuticular Ha3-II	Q14525	KT33B_HUMAN	Filtered	12982.1	1659.03
libDIA	Q06323	Q06323	PSME1	Proteasome activator complex subunit 1	Q06323	PSME1_HUMAN	38169.5	44063.7	35195.7			dirDIA	Q14566	Q14566	MCM6	DNA replication licensing factor MCM6	Q14566	MCM6_HUMAN	12716.8	13133.5	8119.78
libDIA	Q06830	Q06830	PRDX1	Peroxiredoxin-1	Q06830	PRDX1_HUMAN	128892	147528	162700			dirDIA	Q14697	Q14697	GANAB	Neutral alpha-glucosidase AB	Q14697	GANAB_HUMAN	20201.7	25075.3	20287.5
libDIA	Q07020	Q07020	RPL18	60S ribosomal protein L18	Q07020	RL18_HUMAN	51409	73310.9	62848.5			dirDIA	Q14839	Q14839	CHD4	Chromodomain-helicase-DNA-binding protein 4	Q14839	CHD4_HUMAN	1589.45	1422.83	4313.15
libDIA	Q07021	Q07021	C1QBP	Complement component 1 Q subcomponent-binding protein, mitochondrial	Q07021	C1QBP_HUMAN	8007.27	Filtered	4509.93			dirDIA	Q14974	Q14974	KPNB1	Importin subunit beta-1	Q14974	IMB1_HUMAN	2125.62	3093.88	3455.68
libDIA	Q07666	Q07666	KHDRBS1	KH domain-containing, RNA-binding, signal transduction-associated protein 1	Q07666	KHDR1_HUMAN	74546	53366.2	12989.3			dirDIA	Q14CN4;Q3SY84;Q7RTS7;Q86Y46	Q14CN4;Q3SY84;Q7RTS7;Q86Y46	KRT72;KRT71;KRT74;KRT73	Keratin, type II cytoskeletal 72;Keratin, type II cytoskeletal 71;Keratin, type II cytoskeletal 74;Keratin, type II cytoskeletal 73	Q14CN4;Q3SY84;Q7RTS7;Q86Y46	K2C72_HUMAN;K2C71_HUMAN;K2C74_HUMAN;K2C73_HUMAN	5066.33	1389.68	17962.3
libDIA	Q07955	Q07955	SRSF1	Serine/arginine-rich splicing factor 1	Q07955	SRSF1_HUMAN	33440.7	32052.1	26011.7			dirDIA	Q15005	Q15005	SPCS2	Signal peptidase complex subunit 2	Q15005	SPCS2_HUMAN	2262.95	2504.88	4167.52
libDIA	Q08211	Q08211	DHX9	ATP-dependent RNA helicase A	Q08211	DHX9_HUMAN	Filtered	14159	19603.1			dirDIA	Q15029	Q15029	EFTUD2	116 kDa U5 small nuclear ribonucleoprotein component	Q15029	U5S1_HUMAN	4451.93	7439.94	4673.84
libDIA	Q08722	Q08722	CD47	Leukocyte surface antigen CD47	Q08722	CD47_HUMAN	5405.25	Filtered	15735.2			dirDIA	Q15046	Q15046	KARS	Lysine--tRNA ligase	Q15046	SYK_HUMAN	2876.96	1467.57	5364.39
libDIA	Q08945	Q08945	SSRP1	FACT complex subunit SSRP1	Q08945	SSRP1_HUMAN	Filtered	12012.7	9954.1			dirDIA	Q15056	Q15056	EIF4H	Eukaryotic translation initiation factor 4H	Q15056	IF4H_HUMAN	32066.7	41147.1	41969.5
libDIA	Q09028	Q09028	RBBP4	Histone-binding protein RBBP4	Q09028	RBBP4_HUMAN	23509.7	20510.8	23376			dirDIA	Q15084	Q15084	PDIA6	Protein disulfide-isomerase A6	Q15084	PDIA6_HUMAN	14684.1	10570.7	18297
libDIA	Q12788	Q12788	TBL3	Transducin beta-like protein 3	Q12788	TBL3_HUMAN	Filtered	Filtered	1844.05			dirDIA	Q15126	Q15126	PMVK	Phosphomevalonate kinase	Q15126	PMVK_HUMAN	3848.09	4865.39	9095.86
libDIA	Q12874	Q12874	SF3A3	Splicing factor 3A subunit 3	Q12874	SF3A3_HUMAN	Filtered	Filtered	2210.26			dirDIA	Q15181	Q15181	PPA1	Inorganic pyrophosphatase	Q15181	IPYR_HUMAN	21358.2	23724	22559.4
libDIA	Q12904	Q12904	AIMP1	Aminoacyl tRNA synthase complex-interacting multifunctional protein 1	Q12904	AIMP1_HUMAN	15852.4	14330.3	6839.22			dirDIA	Q15185	Q15185	PTGES3	Prostaglandin E synthase 3	Q15185	TEBP_HUMAN	16754	11269.2	7175.35
libDIA	Q12905	Q12905	ILF2	Interleukin enhancer-binding factor 2	Q12905	ILF2_HUMAN	8491.15	Filtered	13117.1			dirDIA	Q15233	Q15233	NONO	Non-POU domain-containing octamer-binding protein	Q15233	NONO_HUMAN	9427.25	7209.74	7181.71
libDIA	Q12906	Q12906	ILF3	Interleukin enhancer-binding factor 3	Q12906	ILF3_HUMAN	8911.86	13761.2	5765.39			dirDIA	Q15306	Q15306	IRF4	Interferon regulatory factor 4	Q15306	IRF4_HUMAN	11505.9	10048.6	8490.14
libDIA	Q12907	Q12907	LMAN2	Vesicular integral-membrane protein VIP36	Q12907	LMAN2_HUMAN	33964	29955.1	13583.4			dirDIA	Q15323	Q15323	KRT31	Keratin, type I cuticular Ha1	Q15323	K1H1_HUMAN	272.176	32651.6	3937.11
libDIA	Q12912	Q12912	LRMP	Lymphoid-restricted membrane protein	Q12912	LRMP_HUMAN	2772.21	Filtered	1401.31			dirDIA	Q15365	Q15365	PCBP1	Poly(rC)-binding protein 1	Q15365	PCBP1_HUMAN	15063.9	13391.9	11258.4
libDIA	Q12931	Q12931	TRAP1	Heat shock protein 75 kDa, mitochondrial	Q12931	TRAP1_HUMAN	17299.9	17663.3	18045.8			dirDIA	Q15370	Q15370	TCEB2	Transcription elongation factor B polypeptide 2	Q15370	ELOB_HUMAN	5150.87	5901.45	4833.28
libDIA	Q13011	Q13011	ECH1	Delta(3,5)-Delta(2,4)-dienoyl-CoA isomerase, mitochondrial	Q13011	ECH1_HUMAN	Filtered	4186.54	7659.99			dirDIA	Q15393	Q15393	SF3B3	Splicing factor 3B subunit 3	Q15393	SF3B3_HUMAN	8272.88	11792.9	13263.2
libDIA	Q13162	Q13162	PRDX4	Peroxiredoxin-4	Q13162	PRDX4_HUMAN	3820	3523.89	7364.59			dirDIA	Q15427	Q15427	SF3B4	Splicing factor 3B subunit 4	Q15427	SF3B4_HUMAN	2436.09	2474.76	1846.62
libDIA	Q13185	Q13185	CBX3	Chromobox protein homolog 3	Q13185	CBX3_HUMAN	18021.4	15658.3	10303.5			dirDIA	Q15459	Q15459	SF3A1	Splicing factor 3A subunit 1	Q15459	SF3A1_HUMAN	6435.02	5866.27	3109.77
libDIA	Q13200	Q13200	PSMD2	26S proteasome non-ATPase regulatory subunit 2	Q13200	PSMD2_HUMAN	Filtered	Filtered	4163.81			dirDIA	Q15631	Q15631	TSN	Translin	Q15631	TSN_HUMAN	2842.02	2822.43	4146.81
libDIA	Q13242	Q13242	SRSF9	Serine/arginine-rich splicing factor 9	Q13242	SRSF9_HUMAN	Filtered	17186.4	18446.3			dirDIA	Q15691	Q15691	MAPRE1	Microtubule-associated protein RP/EB family member 1	Q15691	MARE1_HUMAN	8698.28	7432.17	7260.92
libDIA	Q13243	Q13243	SRSF5	Serine/arginine-rich splicing factor 5	Q13243	SRSF5_HUMAN	3935.64	4977.17	3096.78			dirDIA	Q15717	Q15717	ELAVL1	ELAV-like protein 1	Q15717	ELAV1_HUMAN	14722.8	13996.7	18266.7
libDIA	Q13247	Q13247	SRSF6	Serine/arginine-rich splicing factor 6	Q13247	SRSF6_HUMAN	842678	1.08456e+06	27916.8			dirDIA	Q15843	Q15843	NEDD8	NEDD8	Q15843	NEDD8_HUMAN	6692.18	10611.2	11772.5
libDIA	Q13257	Q13257	MAD2L1	Mitotic spindle assembly checkpoint protein MAD2A	Q13257	MD2L1_HUMAN	Filtered	Filtered	14240.5			dirDIA	Q16181	Q16181	2020-09-07	Septin-7	Q16181	SEPT7_HUMAN	31974	30060.7	22186.3
libDIA	Q13263	Q13263	TRIM28	Transcription intermediary factor 1-beta	Q13263	TIF1B_HUMAN	11535.4	15641.7	8261.36			dirDIA	Q16531	Q16531	DDB1	DNA damage-binding protein 1	Q16531	DDB1_HUMAN	3197.63	5860.31	5074.71
libDIA	Q13283	Q13283	G3BP1	Ras GTPase-activating protein-binding protein 1	Q13283	G3BP1_HUMAN	3707.39	2126.89	4926.32			dirDIA	Q16563	Q16563	SYPL1	Synaptophysin-like protein 1	Q16563	SYPL1_HUMAN	1768.69	2518.47	4757.72
libDIA	Q13310	Q13310	PABPC4	Polyadenylate-binding protein 4	Q13310	PABP4_HUMAN	Filtered	Filtered	6326.58			dirDIA	Q16629	Q16629	SRSF7	Serine/arginine-rich splicing factor 7	Q16629	SRSF7_HUMAN	25256.2	26042.4	34669.8
libDIA	Q13347	Q13347	EIF3I	Eukaryotic translation initiation factor 3 subunit I	Q13347	EIF3I_HUMAN	8986.74	7531.38	9457.88			dirDIA	Q16630	Q16630	CPSF6	Cleavage and polyadenylation specificity factor subunit 6	Q16630	CPSF6_HUMAN	6881.05	9300.65	5285.95
libDIA	Q13404	Q13404	UBE2V1	Ubiquitin-conjugating enzyme E2 variant 1	Q13404	UB2V1_HUMAN	29379.2	30179	21119.5			dirDIA	Q16650	Q16650	TBR1	T-box brain protein 1	Q16650	TBR1_HUMAN	21593.7	15732.3	13959.1
libDIA	Q13405	Q13405	MRPL49	39S ribosomal protein L49, mitochondrial	Q13405	RM49_HUMAN	Filtered	Filtered	5309.97			dirDIA	Q16658	Q16658	FSCN1	Fascin	Q16658	FSCN1_HUMAN	1790.97	5542.33	1101.04
libDIA	Q13435	Q13435	SF3B2	Splicing factor 3B subunit 2	Q13435	SF3B2_HUMAN	12693.4	9351.73	6731.65			dirDIA	Q16666	Q16666	IFI16	Gamma-interferon-inducible protein 16	Q16666	IF16_HUMAN	9143.65	7604.2	6774.84
libDIA	Q13442	Q13442	PDAP1	28 kDa heat- and acid-stable phosphoprotein	Q13442	HAP28_HUMAN	14437.8	11852.2	13304			dirDIA	Q16698	Q16698	DECR1	2,4-dienoyl-CoA reductase, mitochondrial	Q16698	DECR_HUMAN	1	Filtered	1276.91
libDIA	Q13547	Q13547	HDAC1	Histone deacetylase 1	Q13547	HDAC1_HUMAN	Filtered	15472.9	11634			dirDIA	Q16822	Q16822	PCK2	Phosphoenolpyruvate carboxykinase [GTP], mitochondrial	Q16822	PCKGM_HUMAN	4303.26	3261.92	6936.72
libDIA	Q13573	Q13573	SNW1	SNW domain-containing protein 1	Q13573	SNW1_HUMAN	Filtered	4006.2	5240.87			dirDIA	Q3MHD2	Q3MHD2	LSM12	Protein LSM12 homolog	Q3MHD2	LSM12_HUMAN	65.9255	365.35	554.64
libDIA	Q13595	Q13595	TRA2A	Transformer-2 protein homolog alpha	Q13595	TRA2A_HUMAN	Filtered	Filtered	6155.35			dirDIA	Q3ZCQ8	Q3ZCQ8	TIMM50	Mitochondrial import inner membrane translocase subunit TIM50	Q3ZCQ8	TIM50_HUMAN	2842.78	4459.03	3737.71
libDIA	Q13596	Q13596	SNX1	Sorting nexin-1	Q13596	SNX1_HUMAN	Filtered	7160.6	323301			dirDIA	Q53EL6	Q53EL6	PDCD4	Programmed cell death protein 4	Q53EL6	PDCD4_HUMAN	2438	1408.18	3692.28
libDIA	Q13813	Q13813	SPTAN1	Spectrin alpha chain, non-erythrocytic 1	Q13813	SPTN1_HUMAN	8385.6	9657.73	7566.38			dirDIA	Q53GQ0	Q53GQ0	HSD17B12	Very-long-chain 3-oxoacyl-CoA reductase	Q53GQ0	DHB12_HUMAN	Filtered	109.433	1528.48
libDIA	Q13867	Q13867	BLMH	Bleomycin hydrolase	Q13867	BLMH_HUMAN	Filtered	Filtered	11760.8			dirDIA	Q53HL2	Q53HL2	CDCA8	Borealin	Q53HL2	BOREA_HUMAN	3627.06	3280.36	7278.63
libDIA	Q13868	Q13868	EXOSC2	Exosome complex component RRP4	Q13868	EXOS2_HUMAN	Filtered	Filtered	1655.62			dirDIA	Q5D862	Q5D862	FLG2	Filaggrin-2	Q5D862	FILA2_HUMAN	5480.31	598.513	13659.1
libDIA	Q14008	Q14008	CKAP5	Cytoskeleton-associated protein 5	Q14008	CKAP5_HUMAN	2744.11	Filtered	2214.91			dirDIA	Q5T2N8;Q5T9A4;Q9NVI7	Q5T2N8;Q5T9A4;Q9NVI7	ATAD3C;ATAD3B;ATAD3A	ATPase family AAA domain-containing protein 3C;ATPase family AAA domain-containing protein 3B;ATPase family AAA domain-containing protein 3A	Q5T2N8;Q5T9A4;Q9NVI7	ATD3C_HUMAN;ATD3B_HUMAN;ATD3A_HUMAN	4313.75	2892.27	1581.68
libDIA	Q14011	Q14011	CIRBP	Cold-inducible RNA-binding protein	Q14011	CIRBP_HUMAN	8397.4	10026.1	8097.15			dirDIA	Q5T750	Q5T750	XP32	Skin-specific protein 32	Q5T750	XP32_HUMAN	83939.6	38964.7	106003
libDIA	Q14019	Q14019	COTL1	Coactosin-like protein	Q14019	COTL1_HUMAN	14247.9	8120.18	7332.43			dirDIA	Q6KB66	Q6KB66	KRT80	Keratin, type II cytoskeletal 80	Q6KB66	K2C80_HUMAN	Filtered	1.43282	3293.95
libDIA	Q14103	Q14103	HNRNPD	Heterogeneous nuclear ribonucleoprotein D0	Q14103	HNRPD_HUMAN	107647	171412	137316			dirDIA	Q6P2Q9	Q6P2Q9	PRPF8	Pre-mRNA-processing-splicing factor 8	Q6P2Q9	PRP8_HUMAN	3220.51	4842.81	2601.1
libDIA	Q14141	Q14141	2020-09-06	Septin-6	Q14141	SEPT6_HUMAN	Filtered	Filtered	1938.57			dirDIA	Q6ZVX7	Q6ZVX7	NCCRP1	F-box only protein 50	Q6ZVX7	FBX50_HUMAN	157.614	Filtered	3016.42
libDIA	Q14151;Q15424	Q14151;Q15424	SAFB2;SAFB	Scaffold attachment factor B2;Scaffold attachment factor B1	Q14151;Q15424	SAFB2_HUMAN;SAFB1_HUMAN	Filtered	5197.64	3312.59			dirDIA	Q7KZF4	Q7KZF4	SND1	Staphylococcal nuclease domain-containing protein 1	Q7KZF4	SND1_HUMAN	17174.6	20913.7	18474.7
libDIA	Q14152	Q14152	EIF3A	Eukaryotic translation initiation factor 3 subunit A	Q14152	EIF3A_HUMAN	10374.8	9949.78	8843.4			dirDIA	Q7L1Q6	Q7L1Q6	BZW1	Basic leucine zipper and W2 domain-containing protein 1	Q7L1Q6	BZW1_HUMAN	7257.17	12566.9	7678.01
libDIA	Q14165	Q14165	MLEC	Malectin	Q14165	MLEC_HUMAN	Filtered	3348.49	2667.15			dirDIA	Q7L9L4;Q9H8S9	Q7L9L4;Q9H8S9	MOB1B;MOB1A	MOB kinase activator 1B;MOB kinase activator 1A	Q7L9L4;Q9H8S9	MOB1B_HUMAN;MOB1A_HUMAN	2744.95	1121.22	2829.69
libDIA	Q14232	Q14232	EIF2B1	Translation initiation factor eIF-2B subunit alpha	Q14232	EI2BA_HUMAN	Filtered	Filtered	6273.97			dirDIA	Q7RTV0	Q7RTV0	PHF5A	PHD finger-like domain-containing protein 5A	Q7RTV0	PHF5A_HUMAN	10222.1	7896.86	7041.88
libDIA	Q14444	Q14444	CAPRIN1	Caprin-1	Q14444	CAPR1_HUMAN	2322.09	5626.55	4083.77			dirDIA	Q7Z794	Q7Z794	KRT77	Keratin, type II cytoskeletal 1b	Q7Z794	K2C1B_HUMAN	42740.6	6619.1	55217
libDIA	Q14498	Q14498	RBM39	RNA-binding protein 39	Q14498	RBM39_HUMAN	Filtered	Filtered	6455.89			dirDIA	Q86U42	Q86U42	PABPN1	Polyadenylate-binding protein 2	Q86U42	PABP2_HUMAN	6367.89	5893.7	8828.78
libDIA	Q14566	Q14566	MCM6	DNA replication licensing factor MCM6	Q14566	MCM6_HUMAN	11986.6	13753.6	10450.6			dirDIA	Q86UE4	Q86UE4	MTDH	Protein LYRIC	Q86UE4	LYRIC_HUMAN	Filtered	1	1568.51
libDIA	Q14684	Q14684	RRP1B	Ribosomal RNA processing protein 1 homolog B	Q14684	RRP1B_HUMAN	6909.58	Filtered	Filtered			dirDIA	Q86UX7	Q86UX7	FERMT3	Fermitin family homolog 3	Q86UX7	URP2_HUMAN	6875.66	8073.62	9418.84
libDIA	Q14697	Q14697	GANAB	Neutral alpha-glucosidase AB	Q14697	GANAB_HUMAN	19050	25728.8	11305.4			dirDIA	Q86V81	Q86V81	ALYREF	THO complex subunit 4	Q86V81	THOC4_HUMAN	5235.42	5677.75	4702.72
libDIA	Q14739	Q14739	LBR	Lamin-B receptor	Q14739	LBR_HUMAN	23484.6	20068.8	15630.8			dirDIA	Q86VP6	Q86VP6	CAND1	Cullin-associated NEDD8-dissociated protein 1	Q86VP6	CAND1_HUMAN	6813.37	8442.88	10185.8
libDIA	Q14839	Q14839	CHD4	Chromodomain-helicase-DNA-binding protein 4	Q14839	CHD4_HUMAN	Filtered	Filtered	16528.9			dirDIA	Q86X55	Q86X55	CARM1	Histone-arginine methyltransferase CARM1	Q86X55	CARM1_HUMAN	5109.86	5860.38	3979.94
libDIA	Q14974	Q14974	KPNB1	Importin subunit beta-1	Q14974	IMB1_HUMAN	Filtered	Filtered	3982.74			dirDIA	Q86XP3	Q86XP3	DDX42	ATP-dependent RNA helicase DDX42	Q86XP3	DDX42_HUMAN	2123.62	2972.24	3005.01
libDIA	Q15003	Q15003	NCAPH	Condensin complex subunit 2	Q15003	CND2_HUMAN	Filtered	Filtered	3134.1			dirDIA	Q86Y56	Q86Y56	DNAAF5	Dynein assembly factor 5, axonemal	Q86Y56	DAAF5_HUMAN	90300.4	98884.6	109736
libDIA	Q15005	Q15005	SPCS2	Signal peptidase complex subunit 2	Q15005	SPCS2_HUMAN	7191.36	Filtered	7736.46			dirDIA	Q86YZ3	Q86YZ3	HRNR	Hornerin	Q86YZ3	HORN_HUMAN	Filtered	Filtered	1560.92
libDIA	Q15008	Q15008	PSMD6	26S proteasome non-ATPase regulatory subunit 6	Q15008	PSMD6_HUMAN	7631.53	Filtered	6328.48			dirDIA	Q8N163	Q8N163	CCAR2	Cell cycle and apoptosis regulator protein 2	Q8N163	CCAR2_HUMAN	3768.56	3384.81	2536.56
libDIA	Q15020	Q15020	SART3	Squamous cell carcinoma antigen recognized by T-cells 3	Q15020	SART3_HUMAN	Filtered	Filtered	3365.09			dirDIA	Q8N1F7	Q8N1F7	NUP93	Nuclear pore complex protein Nup93	Q8N1F7	NUP93_HUMAN	8284.54	7870.32	3407.98
libDIA	Q15021	Q15021	NCAPD2	Condensin complex subunit 1	Q15021	CND1_HUMAN	Filtered	Filtered	5630.56			dirDIA	Q8N1N4	Q8N1N4	KRT78	Keratin, type II cytoskeletal 78	Q8N1N4	K2C78_HUMAN	11030.5	5712.95	25561.5
libDIA	Q15029	Q15029	EFTUD2	116 kDa U5 small nuclear ribonucleoprotein component	Q15029	U5S1_HUMAN	7676.28	Filtered	6374.81			dirDIA	Q8N9W4	Q8N9W4	GOLGA6L2	Golgin subfamily A member 6-like protein 2	Q8N9W4	GG6L2_HUMAN	8719.25	25519.3	13276.6
libDIA	Q15046	Q15046	KARS	Lysine--tRNA ligase	Q15046	SYK_HUMAN	Filtered	Filtered	5815.48			dirDIA	Q8TEM1	Q8TEM1	NUP210	Nuclear pore membrane glycoprotein 210	Q8TEM1	PO210_HUMAN	1768.08	3358.26	4087.75
libDIA	Q15056	Q15056	EIF4H	Eukaryotic translation initiation factor 4H	Q15056	IF4H_HUMAN	32597.5	41195.2	29672.9			dirDIA	Q8WU39	Q8WU39	MZB1	Marginal zone B- and B1-cell-specific protein	Q8WU39	MZB1_HUMAN	8029.39	4133.39	6664.54
libDIA	Q15084	Q15084	PDIA6	Protein disulfide-isomerase A6	Q15084	PDIA6_HUMAN	15435.3	11785.5	19373.2			dirDIA	Q8WUM4	Q8WUM4	PDCD6IP	Programmed cell death 6-interacting protein	Q8WUM4	PDC6I_HUMAN	1785.69	2011.7	1587.08
libDIA	Q15126	Q15126	PMVK	Phosphomevalonate kinase	Q15126	PMVK_HUMAN	Filtered	Filtered	9350.6			dirDIA	Q8WXF1	Q8WXF1	PSPC1	Paraspeckle component 1	Q8WXF1	PSPC1_HUMAN	7445.57	9482.63	7437.12
libDIA	Q15181	Q15181	PPA1	Inorganic pyrophosphatase	Q15181	IPYR_HUMAN	34678.6	70858.1	25101.2			dirDIA	Q92499	Q92499	DDX1	ATP-dependent RNA helicase DDX1	Q92499	DDX1_HUMAN	3208.7	4173.72	2870.37
libDIA	Q15185	Q15185	PTGES3	Prostaglandin E synthase 3	Q15185	TEBP_HUMAN	17243.5	11246.1	8293.08			dirDIA	Q92598	Q92598	HSPH1	Heat shock protein 105 kDa	Q92598	HS105_HUMAN	6433.97	11234.4	10428.1
libDIA	Q15233	Q15233	NONO	Non-POU domain-containing octamer-binding protein	Q15233	NONO_HUMAN	12403.4	9510.39	3020.45			dirDIA	Q92841	Q92841	DDX17	Probable ATP-dependent RNA helicase DDX17	Q92841	DDX17_HUMAN	33342	59965.9	45522
libDIA	Q15306	Q15306	IRF4	Interferon regulatory factor 4	Q15306	IRF4_HUMAN	8434.46	Filtered	7276.98			dirDIA	Q92945	Q92945	KHSRP	Far upstream element-binding protein 2	Q92945	FUBP2_HUMAN	23764	31997.7	25244
libDIA	Q15370	Q15370	TCEB2	Transcription elongation factor B polypeptide 2	Q15370	ELOB_HUMAN	5816.98	Filtered	4860.06			dirDIA	Q92973	Q92973	TNPO1	Transportin-1	Q92973	TNPO1_HUMAN	6055.76	4666.7	9328.91
libDIA	Q15392	Q15392	DHCR24	Delta(24)-sterol reductase	Q15392	DHC24_HUMAN	Filtered	Filtered	3516.14			dirDIA	Q92979	Q92979	EMG1	Ribosomal RNA small subunit methyltransferase NEP1	Q92979	NEP1_HUMAN	13054.6	14194.3	12226.3
libDIA	Q15393	Q15393	SF3B3	Splicing factor 3B subunit 3	Q15393	SF3B3_HUMAN	9662.12	12377.5	13384.2			dirDIA	Q93009	Q93009	USP7	Ubiquitin carboxyl-terminal hydrolase 7	Q93009	UBP7_HUMAN	1494.87	Filtered	2266.57
libDIA	Q15435	Q15435	PPP1R7	Protein phosphatase 1 regulatory subunit 7	Q15435	PP1R7_HUMAN	Filtered	Filtered	3434.34			dirDIA	Q95IE3	Q95IE3	HLA-DRB1	HLA class II histocompatibility antigen, DRB1-12 beta chain	Q95IE3	2B1C_HUMAN	2908.65	3541.63	4604.46
libDIA	Q15691	Q15691	MAPRE1	Microtubule-associated protein RP/EB family member 1	Q15691	MARE1_HUMAN	9413.55	10449.9	7193.16			dirDIA	Q969H8	Q969H8	MYDGF	Myeloid-derived growth factor	Q969H8	MYDGF_HUMAN	514.842	386.014	2628.79
libDIA	Q15717	Q15717	ELAVL1	ELAV-like protein 1	Q15717	ELAV1_HUMAN	16079.2	15866	16736.7			dirDIA	Q96AE4	Q96AE4	FUBP1	Far upstream element-binding protein 1	Q96AE4	FUBP1_HUMAN	15074.2	18597.4	20412.2
libDIA	Q15843	Q15843	NEDD8	NEDD8	Q15843	NEDD8_HUMAN	9217.85	15875.5	15769.3			dirDIA	Q96AG4	Q96AG4	LRRC59	Leucine-rich repeat-containing protein 59	Q96AG4	LRC59_HUMAN	12779.4	14362.6	11429.3
libDIA	Q16181	Q16181	2020-09-07	Septin-7	Q16181	SEPT7_HUMAN	31291.9	28722.9	22759.9			dirDIA	Q96BX8	Q96BX8	MOB3A	MOB kinase activator 3A	Q96BX8	MOB3A_HUMAN	3620.34	5141.45	3767.88
libDIA	Q16531	Q16531	DDB1	DNA damage-binding protein 1	Q16531	DDB1_HUMAN	12216.4	13021	10713.4			dirDIA	Q96CT7	Q96CT7	CCDC124	Coiled-coil domain-containing protein 124	Q96CT7	CC124_HUMAN	1410.99	1114.84	3501.83
libDIA	Q16563	Q16563	SYPL1	Synaptophysin-like protein 1	Q16563	SYPL1_HUMAN	Filtered	Filtered	7552.67			dirDIA	Q96FW1	Q96FW1	OTUB1	Ubiquitin thioesterase OTUB1	Q96FW1	OTUB1_HUMAN	7457.28	7078.57	6366.76
libDIA	Q16629	Q16629	SRSF7	Serine/arginine-rich splicing factor 7	Q16629	SRSF7_HUMAN	27120.6	27215.9	37162.4			dirDIA	Q96HU8	Q96HU8	DIRAS2	GTP-binding protein Di-Ras2	Q96HU8	DIRA2_HUMAN	14837.8	14124.1	5555.8
libDIA	Q16630	Q16630	CPSF6	Cleavage and polyadenylation specificity factor subunit 6	Q16630	CPSF6_HUMAN	5207.88	7052.9	5155.13			dirDIA	Q96I99	Q96I99	SUCLG2	Succinyl-CoA ligase [GDP-forming] subunit beta, mitochondrial	Q96I99	SUCB2_HUMAN	2226.12	4060.49	1682.6
libDIA	Q16650	Q16650	TBR1	T-box brain protein 1	Q16650	TBR1_HUMAN	22164.7	16522.7	15104.5			dirDIA	Q96IX5	Q96IX5	USMG5	Up-regulated during skeletal muscle growth protein 5	Q96IX5	USMG5_HUMAN	10028.5	8984.55	9898.71
libDIA	Q16666	Q16666	IFI16	Gamma-interferon-inducible protein 16	Q16666	IF16_HUMAN	19279.2	17005.7	7441.28			dirDIA	Q96JB1	Q96JB1	DNAH8	Dynein heavy chain 8, axonemal	Q96JB1	DYH8_HUMAN	70794.4	53569	2170.71
libDIA	Q16698	Q16698	DECR1	2,4-dienoyl-CoA reductase, mitochondrial	Q16698	DECR_HUMAN	8868.83	7913.98	4742.96			dirDIA	Q96KN8	Q96KN8	HRASLS5	Ca(2+)-independent N-acyltransferase	Q96KN8	HRSL5_HUMAN	11383.6	8922.38	6367.37
libDIA	Q16822	Q16822	PCK2	Phosphoenolpyruvate carboxykinase [GTP], mitochondrial	Q16822	PCKGM_HUMAN	Filtered	Filtered	5911.95			dirDIA	Q96KP4	Q96KP4	CNDP2	Cytosolic non-specific dipeptidase	Q96KP4	CNDP2_HUMAN	2680.45	7643.4	4468.99
libDIA	Q16891	Q16891	IMMT	MICOS complex subunit MIC60	Q16891	MIC60_HUMAN	5231.18	4591.4	4294.03			dirDIA	Q96P63	Q96P63	SERPINB12	Serpin B12	Q96P63	SPB12_HUMAN	394.096	557.195	9385.78
libDIA	Q30154	Q30154	HLA-DRB5	HLA class II histocompatibility antigen, DR beta 5 chain	Q30154	DRB5_HUMAN	6477.07	12200	2724.45			dirDIA	Q96PK6	Q96PK6	RBM14	RNA-binding protein 14	Q96PK6	RBM14_HUMAN	10812.3	12026.7	7439.32
libDIA	Q4VC31	Q4VC31	CCDC58	Coiled-coil domain-containing protein 58	Q4VC31	CCD58_HUMAN	Filtered	Filtered	3028.47			dirDIA	Q96RU3	Q96RU3	FNBP1	Formin-binding protein 1	Q96RU3	FNBP1_HUMAN	7187.06	5152.06	5175.46
libDIA	Q53EL6	Q53EL6	PDCD4	Programmed cell death protein 4	Q53EL6	PDCD4_HUMAN	Filtered	Filtered	5576.51			dirDIA	Q99460	Q99460	PSMD1	26S proteasome non-ATPase regulatory subunit 1	Q99460	PSMD1_HUMAN	2412.45	2261.54	3267.44
libDIA	Q562R1	Q562R1	ACTBL2	Beta-actin-like protein 2	Q562R1	ACTBL_HUMAN	Filtered	89629	64548.2			dirDIA	Q99471	Q99471	PFDN5	Prefoldin subunit 5	Q99471	PFD5_HUMAN	1718.85	3996.8	2206.63
libDIA	Q5BJD5	Q5BJD5	TMEM41B	Transmembrane protein 41B	Q5BJD5	TM41B_HUMAN	Filtered	825556	487756			dirDIA	Q99497	Q99497	PARK7	Protein deglycase DJ-1	Q99497	PARK7_HUMAN	9668.9	7673.41	Filtered
libDIA	Q5BJF2	Q5BJF2	TMEM97	Transmembrane protein 97	Q5BJF2	TMM97_HUMAN	Filtered	Filtered	5981.54			dirDIA	Q99623	Q99623	PHB2	Prohibitin-2	Q99623	PHB2_HUMAN	34232.1	33846	31598.4
libDIA	Q5FWF4	Q5FWF4	ZRANB3	DNA annealing helicase and endonuclease ZRANB3	Q5FWF4	ZRAB3_HUMAN	15532587	19816626	120532			dirDIA	Q99714	Q99714	HSD17B10	3-hydroxyacyl-CoA dehydrogenase type-2	Q99714	HCD2_HUMAN	15961	20667	15695.3
libDIA	Q5JPH6	Q5JPH6	EARS2	Probable glutamate--tRNA ligase, mitochondrial	Q5JPH6	SYEM_HUMAN	Filtered	14646.6	12159			dirDIA	Q99798	Q99798	ACO2	Aconitate hydratase, mitochondrial	Q99798	ACON_HUMAN	5042.41	9291.98	8197.05
libDIA	Q5T9A4;Q9NVI7	Q5T9A4;Q9NVI7	ATAD3B;ATAD3A	ATPase family AAA domain-containing protein 3B;ATPase family AAA domain-containing protein 3A	Q5T9A4;Q9NVI7	ATD3B_HUMAN;ATD3A_HUMAN	4745.48	4311.46	Filtered			dirDIA	Q99829	Q99829	CPNE1	Copine-1	Q99829	CPNE1_HUMAN	1657.68	2355.72	2475.7
libDIA	Q6BDS2	Q6BDS2	UHRF1BP1	UHRF1-binding protein 1	Q6BDS2	URFB1_HUMAN	Filtered	25725.6	4103.57			dirDIA	Q99832	Q99832	CCT7	T-complex protein 1 subunit eta	Q99832	TCPH_HUMAN	11317.5	9842.57	10201.5
libDIA	Q6IBS0	Q6IBS0	TWF2	Twinfilin-2	Q6IBS0	TWF2_HUMAN	Filtered	Filtered	1824.38			dirDIA	Q99873	Q99873	PRMT1	Protein arginine N-methyltransferase 1	Q99873	ANM1_HUMAN	23209.2	32347.6	24243.3
libDIA	Q6KC79	Q6KC79	NIPBL	Nipped-B-like protein	Q6KC79	NIPBL_HUMAN	2.48611e+06	2.70551e+06	Filtered			dirDIA	Q99986	Q99986	VRK1	Serine/threonine-protein kinase VRK1	Q99986	VRK1_HUMAN	1	1169.71	2177.27
libDIA	Q6L8Q7	Q6L8Q7	PDE12	2',5'-phosphodiesterase 12	Q6L8Q7	PDE12_HUMAN	98726.4	86552.1	Filtered			dirDIA	Q9BRJ6	Q9BRJ6	C7orf50	Uncharacterized protein C7orf50	Q9BRJ6	CG050_HUMAN	2383	3427.56	9184.9
libDIA	Q6P2Q9	Q6P2Q9	PRPF8	Pre-mRNA-processing-splicing factor 8	Q6P2Q9	PRP8_HUMAN	Filtered	8793.11	5989.46			dirDIA	Q9BS26	Q9BS26	ERP44	Endoplasmic reticulum resident protein 44	Q9BS26	ERP44_HUMAN	13072.6	19805.1	15926.3
libDIA	Q6P996	Q6P996	PDXDC1	Pyridoxal-dependent decarboxylase domain-containing protein 1	Q6P996	PDXD1_HUMAN	3573.13	Filtered	1990.73			dirDIA	Q9BT78	Q9BT78	COPS4	COP9 signalosome complex subunit 4	Q9BT78	CSN4_HUMAN	2046.56	507.091	3326.31
libDIA	Q6PKG0	Q6PKG0	LARP1	La-related protein 1	Q6PKG0	LARP1_HUMAN	Filtered	Filtered	2095.51			dirDIA	Q9BTT0	Q9BTT0	ANP32E	Acidic leucine-rich nuclear phosphoprotein 32 family member E	Q9BTT0	AN32E_HUMAN	9993.9	10405.2	13850.2
libDIA	Q6S8J3	Q6S8J3	POTEE	POTE ankyrin domain family member E	Q6S8J3	POTEE_HUMAN	Filtered	766879	1.24533e+06			dirDIA	Q9BUL8	Q9BUL8	PDCD10	Programmed cell death protein 10	Q9BUL8	PDC10_HUMAN	6928.39	6816.4	5538.1
libDIA	Q6ZMZ3	Q6ZMZ3	SYNE3	Nesprin-3	Q6ZMZ3	SYNE3_HUMAN	12158.7	9304.98	19038.5			dirDIA	Q9BVC6	Q9BVC6	TMEM109	Transmembrane protein 109	Q9BVC6	TM109_HUMAN	19645.5	18039.3	26151.7
libDIA	Q7KZF4	Q7KZF4	SND1	Staphylococcal nuclease domain-containing protein 1	Q7KZF4	SND1_HUMAN	15655.8	21850	15238.6			dirDIA	Q9BVP2	Q9BVP2	GNL3	Guanine nucleotide-binding protein-like 3	Q9BVP2	GNL3_HUMAN	3879.62	3851.43	6872.62
libDIA	Q7L014	Q7L014	DDX46	Probable ATP-dependent RNA helicase DDX46	Q7L014	DDX46_HUMAN	Filtered	Filtered	5849.86			dirDIA	Q9BY43	Q9BY43	CHMP4A	Charged multivesicular body protein 4a	Q9BY43	CHM4A_HUMAN	2044.79	2382.99	2021.37
libDIA	Q7L1Q6	Q7L1Q6	BZW1	Basic leucine zipper and W2 domain-containing protein 1	Q7L1Q6	BZW1_HUMAN	14747.4	16994.5	12726.1			dirDIA	Q9BYC2	Q9BYC2	OXCT2	Succinyl-CoA:3-ketoacid coenzyme A transferase 2, mitochondrial	Q9BYC2	SCOT2_HUMAN	1448.26	2987.47	2417.33
libDIA	Q7L9L4;Q9H8S9	Q7L9L4;Q9H8S9	MOB1B;MOB1A	MOB kinase activator 1B;MOB kinase activator 1A	Q7L9L4;Q9H8S9	MOB1B_HUMAN;MOB1A_HUMAN	Filtered	Filtered	3030.67			dirDIA	Q9BZK7	Q9BZK7	TBL1XR1	F-box-like/WD repeat-containing protein TBL1XR1	Q9BZK7	TBL1R_HUMAN	4237.34	3582.43	4071.4
libDIA	Q7RTV0	Q7RTV0	PHF5A	PHD finger-like domain-containing protein 5A	Q7RTV0	PHF5A_HUMAN	12227.4	Filtered	7632			dirDIA	Q9BZZ5	Q9BZZ5	API5	Apoptosis inhibitor 5	Q9BZZ5	API5_HUMAN	5302.3	7592.92	8547.85
libDIA	Q7Z2W4	Q7Z2W4	ZC3HAV1	Zinc finger CCCH-type antiviral protein 1	Q7Z2W4	ZCCHV_HUMAN	Filtered	Filtered	4323.09			dirDIA	Q9C005	Q9C005	DPY30	Protein dpy-30 homolog	Q9C005	DPY30_HUMAN	4013.74	4588.37	2352.68
libDIA	Q7Z4W1	Q7Z4W1	DCXR	L-xylulose reductase	Q7Z4W1	DCXR_HUMAN	Filtered	Filtered	6714.13			dirDIA	Q9C0B1	Q9C0B1	FTO	Alpha-ketoglutarate-dependent dioxygenase FTO	Q9C0B1	FTO_HUMAN	588175	309252	616213
libDIA	Q86U42	Q86U42	PABPN1	Polyadenylate-binding protein 2	Q86U42	PABP2_HUMAN	6974.3	6112.63	9269.08			dirDIA	Q9GZT3	Q9GZT3	SLIRP	SRA stem-loop-interacting RNA-binding protein, mitochondrial	Q9GZT3	SLIRP_HUMAN	13869.5	15370.2	13805.6
libDIA	Q86UX7	Q86UX7	FERMT3	Fermitin family homolog 3	Q86UX7	URP2_HUMAN	Filtered	10836	9989.08			dirDIA	Q9GZZ1	Q9GZZ1	NAA50	N-alpha-acetyltransferase 50	Q9GZZ1	NAA50_HUMAN	2843.23	6381.77	4670.85
libDIA	Q86V81	Q86V81	ALYREF	THO complex subunit 4	Q86V81	THOC4_HUMAN	15410.4	18519.6	4993.24			dirDIA	Q9H0A0	Q9H0A0	NAT10	N-acetyltransferase 10	Q9H0A0	NAT10_HUMAN	4162.29	5100.45	4250.63
libDIA	Q86VP6	Q86VP6	CAND1	Cullin-associated NEDD8-dissociated protein 1	Q86VP6	CAND1_HUMAN	Filtered	14627.2	10874.5			dirDIA	Q9H0S4	Q9H0S4	DDX47	Probable ATP-dependent RNA helicase DDX47	Q9H0S4	DDX47_HUMAN	3025.75	5970.62	3237.35
libDIA	Q86X55	Q86X55	CARM1	Histone-arginine methyltransferase CARM1	Q86X55	CARM1_HUMAN	Filtered	7390.8	4296.26			dirDIA	Q9H2U2	Q9H2U2	PPA2	Inorganic pyrophosphatase 2, mitochondrial	Q9H2U2	IPYR2_HUMAN	6715.36	5721.28	3476.15
libDIA	Q86XP3	Q86XP3	DDX42	ATP-dependent RNA helicase DDX42	Q86XP3	DDX42_HUMAN	Filtered	Filtered	4180.34			dirDIA	Q9H3K6	Q9H3K6	BOLA2	BolA-like protein 2	Q9H3K6	BOLA2_HUMAN	10787.2	13194.6	9011.44
libDIA	Q86YV0	Q86YV0	RASAL3	RAS protein activator like-3	Q86YV0	RASL3_HUMAN	Filtered	Filtered	3804.96			dirDIA	Q9H910	Q9H910	HN1L	Hematological and neurological expressed 1-like protein	Q9H910	HN1L_HUMAN	3834.5	5701.59	4082.6
libDIA	Q8IUE6	Q8IUE6	HIST2H2AB	Histone H2A type 2-B	Q8IUE6	H2A2B_HUMAN	21293.4	22574.8	8843.93			dirDIA	Q9H9B4	Q9H9B4	SFXN1	Sideroflexin-1	Q9H9B4	SFXN1_HUMAN	8146.02	8954.82	9108.65
libDIA	Q8N163	Q8N163	CCAR2	Cell cycle and apoptosis regulator protein 2	Q8N163	CCAR2_HUMAN	Filtered	5967.92	2904.32			dirDIA	Q9HAV7	Q9HAV7	GRPEL1	GrpE protein homolog 1, mitochondrial	Q9HAV7	GRPE1_HUMAN	3544.28	1898.88	1753.11
libDIA	Q8N1G4	Q8N1G4	LRRC47	Leucine-rich repeat-containing protein 47	Q8N1G4	LRC47_HUMAN	Filtered	Filtered	6554.11			dirDIA	Q9NPJ3	Q9NPJ3	ACOT13	Acyl-coenzyme A thioesterase 13	Q9NPJ3	ACO13_HUMAN	1645.57	1956.9	2279.26
libDIA	Q8TAQ2;Q92922	Q8TAQ2;Q92922	SMARCC2;SMARCC1	SWI/SNF complex subunit SMARCC2;SWI/SNF complex subunit SMARCC1	Q8TAQ2;Q92922	SMRC2_HUMAN;SMRC1_HUMAN	Filtered	Filtered	2222.68			dirDIA	Q9NQC3	Q9NQC3	RTN4	Reticulon-4	Q9NQC3	RTN4_HUMAN	11533.6	19919	13293
libDIA	Q8TBQ9	Q8TBQ9	TMEM167A	Protein kish-A	Q8TBQ9	KISHA_HUMAN	5100.99	Filtered	5513.7			dirDIA	Q9NR28	Q9NR28	DIABLO	Diablo homolog, mitochondrial	Q9NR28	DBLOH_HUMAN	3043.66	3455.05	2334.13
libDIA	Q8TCS8	Q8TCS8	PNPT1	Polyribonucleotide nucleotidyltransferase 1, mitochondrial	Q8TCS8	PNPT1_HUMAN	Filtered	5153.22	4310.74			dirDIA	Q9NR30	Q9NR30	DDX21	Nucleolar RNA helicase 2	Q9NR30	DDX21_HUMAN	36749.4	52036.2	38584.7
libDIA	Q8TEM1	Q8TEM1	NUP210	Nuclear pore membrane glycoprotein 210	Q8TEM1	PO210_HUMAN	2977.56	3554.82	5946.38			dirDIA	Q9NR31	Q9NR31	SAR1A	GTP-binding protein SAR1a	Q9NR31	SAR1A_HUMAN	7083.23	6803.89	9817.18
libDIA	Q8WU39	Q8WU39	MZB1	Marginal zone B- and B1-cell-specific protein	Q8WU39	MZB1_HUMAN	8150.37	Filtered	6738.09			dirDIA	Q9NR45	Q9NR45	NANS	Sialic acid synthase	Q9NR45	SIAS_HUMAN	307.251	Filtered	946.918
libDIA	Q8WUM4	Q8WUM4	PDCD6IP	Programmed cell death 6-interacting protein	Q8WUM4	PDC6I_HUMAN	Filtered	3597.96	6181.3			dirDIA	Q9NRF9	Q9NRF9	POLE3	DNA polymerase epsilon subunit 3	Q9NRF9	DPOE3_HUMAN	5943.35	5929.92	3817.65
libDIA	Q8WVY7	Q8WVY7	UBLCP1	Ubiquitin-like domain-containing CTD phosphatase 1	Q8WVY7	UBCP1_HUMAN	11330.3	12784.3	8094.53			dirDIA	Q9NSB2	Q9NSB2	KRT84	Keratin, type II cuticular Hb4	Q9NSB2	KRT84_HUMAN	883.159	20911.4	1824.06
libDIA	Q8WW12	Q8WW12	PCNP	PEST proteolytic signal-containing nuclear protein	Q8WW12	PCNP_HUMAN	Filtered	4518.83	4426.2			dirDIA	Q9NSD9	Q9NSD9	FARSB	Phenylalanine--tRNA ligase beta subunit	Q9NSD9	SYFB_HUMAN	8257.24	7696.43	8150.57
libDIA	Q8WXF1	Q8WXF1	PSPC1	Paraspeckle component 1	Q8WXF1	PSPC1_HUMAN	6833.56	9114.41	7911.6			dirDIA	Q9NTJ3	Q9NTJ3	SMC4	Structural maintenance of chromosomes protein 4	Q9NTJ3	SMC4_HUMAN	6078.2	8021.41	5348.04
libDIA	Q8WXH0	Q8WXH0	SYNE2	Nesprin-2	Q8WXH0	SYNE2_HUMAN	Filtered	5829.03	5921.64			dirDIA	Q9NTK5	Q9NTK5	OLA1	Obg-like ATPase 1	Q9NTK5	OLA1_HUMAN	2292.22	1249.49	5092.68
libDIA	Q8WXX5	Q8WXX5	DNAJC9	DnaJ homolog subfamily C member 9	Q8WXX5	DNJC9_HUMAN	Filtered	Filtered	3893.39			dirDIA	Q9NTZ6	Q9NTZ6	RBM12	RNA-binding protein 12	Q9NTZ6	RBM12_HUMAN	907.397	1155.01	2627.95
libDIA	Q8WYJ6	Q8WYJ6	2020-09-01	Septin-1	Q8WYJ6	SEPT1_HUMAN	Filtered	Filtered	2452.43			dirDIA	Q9NY12	Q9NY12	GAR1	H/ACA ribonucleoprotein complex subunit 1	Q9NY12	GAR1_HUMAN	1838.15	3020.63	4575.22
libDIA	Q92544	Q92544	TM9SF4	Transmembrane 9 superfamily member 4	Q92544	TM9S4_HUMAN	Filtered	Filtered	5648.57			dirDIA	Q9NY33	Q9NY33	DPP3	Dipeptidyl peptidase 3	Q9NY33	DPP3_HUMAN	3705.84	3290.35	Filtered
libDIA	Q92598	Q92598	HSPH1	Heat shock protein 105 kDa	Q92598	HS105_HUMAN	5984.66	11516.5	8091.96			dirDIA	Q9NZ01	Q9NZ01	TECR	Very-long-chain enoyl-CoA reductase	Q9NZ01	TECR_HUMAN	803.895	Filtered	2026.47
libDIA	Q92616	Q92616	GCN1L1	Translational activator GCN1	Q92616	GCN1L_HUMAN	Filtered	7320.87	7139.35			dirDIA	Q9NZ08	Q9NZ08	ERAP1	Endoplasmic reticulum aminopeptidase 1	Q9NZ08	ERAP1_HUMAN	8504.16	5534.23	4969.16
libDIA	Q92673	Q92673	SORL1	Sortilin-related receptor	Q92673	SORL_HUMAN	Filtered	37574	22587			dirDIA	Q9NZT1	Q9NZT1	CALML5	Calmodulin-like protein 5	Q9NZT1	CALL5_HUMAN	1	3306.61	Filtered
libDIA	Q92734	Q92734	TFG	Protein TFG	Q92734	TFG_HUMAN	Filtered	Filtered	5726.71			dirDIA	Q9P035	Q9P035	HACD3	Very-long-chain (3R)-3-hydroxyacyl-CoA dehydratase 3	Q9P035	HACD3_HUMAN	2533.58	4444.45	3548.39
libDIA	Q92841	Q92841	DDX17	Probable ATP-dependent RNA helicase DDX17	Q92841	DDX17_HUMAN	87349.5	88567.6	47332.1			dirDIA	Q9P258	Q9P258	RCC2	Protein RCC2	Q9P258	RCC2_HUMAN	11609.5	6783.16	19902.2
libDIA	Q92890	Q92890	UFD1L	Ubiquitin fusion degradation protein 1 homolog	Q92890	UFD1_HUMAN	Filtered	3967.28	4063.89			dirDIA	Q9P2J5	Q9P2J5	LARS	Leucine--tRNA ligase, cytoplasmic	Q9P2J5	SYLC_HUMAN	12965.2	14985	12018.2
libDIA	Q92945	Q92945	KHSRP	Far upstream element-binding protein 2	Q92945	FUBP2_HUMAN	28673.1	34076.2	27788.8			dirDIA	Q9UBD5	Q9UBD5	ORC3	Origin recognition complex subunit 3	Q9UBD5	ORC3_HUMAN	39734.5	48067.6	31401.1
libDIA	Q92973	Q92973	TNPO1	Transportin-1	Q92973	TNPO1_HUMAN	7254.44	6049.4	8320.65			dirDIA	Q9UBQ7	Q9UBQ7	GRHPR	Glyoxylate reductase/hydroxypyruvate reductase	Q9UBQ7	GRHPR_HUMAN	2756.65	4104.75	6947.87
libDIA	Q92979	Q92979	EMG1	Ribosomal RNA small subunit methyltransferase NEP1	Q92979	NEP1_HUMAN	13634.6	14571.6	12826.5			dirDIA	Q9UBS4	Q9UBS4	DNAJB11	DnaJ homolog subfamily B member 11	Q9UBS4	DJB11_HUMAN	5175.92	12269.6	9909.21
libDIA	Q93009	Q93009	USP7	Ubiquitin carboxyl-terminal hydrolase 7	Q93009	UBP7_HUMAN	9521.1	6014.13	2090.14			dirDIA	Q9UBT2	Q9UBT2	UBA2	SUMO-activating enzyme subunit 2	Q9UBT2	SAE2_HUMAN	8002.43	7022.01	4577.38
libDIA	Q95IE3	Q95IE3	HLA-DRB1	HLA class II histocompatibility antigen, DRB1-12 beta chain	Q95IE3	2B1C_HUMAN	4510.91	Filtered	4135.75			dirDIA	Q9UBX3	Q9UBX3	SLC25A10	Mitochondrial dicarboxylate carrier	Q9UBX3	DIC_HUMAN	4399.9	6240.36	5027.28
libDIA	Q969G3	Q969G3	SMARCE1	SWI/SNF-related matrix-associated actin-dependent regulator of chromatin subfamily E member 1	Q969G3	SMCE1_HUMAN	Filtered	Filtered	1974.89			dirDIA	Q9UHD8	Q9UHD8	2020-09-09	Septin-9	Q9UHD8	SEPT9_HUMAN	10106.8	12568.2	9706.7
libDIA	Q969H8	Q969H8	MYDGF	Myeloid-derived growth factor	Q969H8	MYDGF_HUMAN	Filtered	Filtered	4133.83			dirDIA	Q9UHD9;Q9UMX0	Q9UHD9;Q9UMX0	UBQLN2;UBQLN1	Ubiquilin-2;Ubiquilin-1	Q9UHD9;Q9UMX0	UBQL2_HUMAN;UBQL1_HUMAN	871.358	390.053	1793.59
libDIA	Q96AE4	Q96AE4	FUBP1	Far upstream element-binding protein 1	Q96AE4	FUBP1_HUMAN	18380.2	17128.4	14232.5			dirDIA	Q9UHV9	Q9UHV9	PFDN2	Prefoldin subunit 2	Q9UHV9	PFD2_HUMAN	8015.01	8665.68	5105.93
libDIA	Q96AG4	Q96AG4	LRRC59	Leucine-rich repeat-containing protein 59	Q96AG4	LRC59_HUMAN	Filtered	11295.5	8006.16			dirDIA	Q9UHX1	Q9UHX1	PUF60	Poly(U)-binding-splicing factor PUF60	Q9UHX1	PUF60_HUMAN	875.919	1.07987	757.234
libDIA	Q96BX8	Q96BX8	MOB3A	MOB kinase activator 3A	Q96BX8	MOB3A_HUMAN	Filtered	5304.02	4648.64			dirDIA	Q9UJU6	Q9UJU6	DBNL	Drebrin-like protein	Q9UJU6	DBNL_HUMAN	4938.35	4138.88	2005.2
libDIA	Q96C19	Q96C19	EFHD2	EF-hand domain-containing protein D2	Q96C19	EFHD2_HUMAN	5099.21	5069.72	Filtered			dirDIA	Q9UKD2	Q9UKD2	MRTO4	mRNA turnover protein 4 homolog	Q9UKD2	MRT4_HUMAN	9959.46	10953.9	13180
libDIA	Q96CS3	Q96CS3	FAF2	FAS-associated factor 2	Q96CS3	FAF2_HUMAN	Filtered	Filtered	4767.84			dirDIA	Q9UKK9	Q9UKK9	NUDT5	ADP-sugar pyrophosphatase	Q9UKK9	NUDT5_HUMAN	991.638	1912.86	4122.06
libDIA	Q96CT7	Q96CT7	CCDC124	Coiled-coil domain-containing protein 124	Q96CT7	CC124_HUMAN	Filtered	Filtered	4204.75			dirDIA	Q9UKM9	Q9UKM9	RALY	RNA-binding protein Raly	Q9UKM9	RALY_HUMAN	9831	11972.7	9297.25
libDIA	Q96FW1	Q96FW1	OTUB1	Ubiquitin thioesterase OTUB1	Q96FW1	OTUB1_HUMAN	Filtered	Filtered	3466.91			dirDIA	Q9UL46	Q9UL46	PSME2	Proteasome activator complex subunit 2	Q9UL46	PSME2_HUMAN	10909.8	8920.48	2989.55
libDIA	Q96HS1	Q96HS1	PGAM5	Serine/threonine-protein phosphatase PGAM5, mitochondrial	Q96HS1	PGAM5_HUMAN	7512.27	6654.46	7408.24			dirDIA	Q9ULL4	Q9ULL4	PLXNB3	Plexin-B3	Q9ULL4	PLXB3_HUMAN	104455	102131	100788
libDIA	Q96I99	Q96I99	SUCLG2	Succinyl-CoA ligase [GDP-forming] subunit beta, mitochondrial	Q96I99	SUCB2_HUMAN	Filtered	Filtered	2746.28			dirDIA	Q9UMS4	Q9UMS4	PRPF19	Pre-mRNA-processing factor 19	Q9UMS4	PRP19_HUMAN	6210.61	8844.74	8944.11
libDIA	Q96IX5	Q96IX5	USMG5	Up-regulated during skeletal muscle growth protein 5	Q96IX5	USMG5_HUMAN	11417.2	10277.8	9997.78			dirDIA	Q9UNM6	Q9UNM6	PSMD13	26S proteasome non-ATPase regulatory subunit 13	Q9UNM6	PSD13_HUMAN	1570.98	2243.85	706.52
libDIA	Q96KP4	Q96KP4	CNDP2	Cytosolic non-specific dipeptidase	Q96KP4	CNDP2_HUMAN	7304.07	8893.46	10308			dirDIA	Q9UQ80	Q9UQ80	PA2G4	Proliferation-associated protein 2G4	Q9UQ80	PA2G4_HUMAN	37243.7	40463.6	35803.3
libDIA	Q96PK6	Q96PK6	RBM14	RNA-binding protein 14	Q96PK6	RBM14_HUMAN	7521.31	9655.5	6834.87			dirDIA	Q9UQE7	Q9UQE7	SMC3	Structural maintenance of chromosomes protein 3	Q9UQE7	SMC3_HUMAN	4128.22	3167.58	2388.22
libDIA	Q96QK1	Q96QK1	VPS35	Vacuolar protein sorting-associated protein 35	Q96QK1	VPS35_HUMAN	Filtered	13237.6	6707.08			dirDIA	Q9Y230	Q9Y230	RUVBL2	RuvB-like 2	Q9Y230	RUVB2_HUMAN	17722.7	18656.2	17119
libDIA	Q96RP9	Q96RP9	GFM1	Elongation factor G, mitochondrial	Q96RP9	EFGM_HUMAN	19373.2	Filtered	4645.36			dirDIA	Q9Y265	Q9Y265	RUVBL1	RuvB-like 1	Q9Y265	RUVB1_HUMAN	20096.3	18717	16357.1
libDIA	Q96RU3	Q96RU3	FNBP1	Formin-binding protein 1	Q96RU3	FNBP1_HUMAN	8180.11	5223.11	6937.26			dirDIA	Q9Y266	Q9Y266	NUDC	Nuclear migration protein nudC	Q9Y266	NUDC_HUMAN	4914.03	5822.98	5884.13
libDIA	Q99436	Q99436	PSMB7	Proteasome subunit beta type-7	Q99436	PSB7_HUMAN	15139.4	10867.8	13818.6			dirDIA	Q9Y277	Q9Y277	VDAC3	Voltage-dependent anion-selective channel protein 3	Q9Y277	VDAC3_HUMAN	4970.12	3893.59	6390.81
libDIA	Q99439	Q99439	CNN2	Calponin-2	Q99439	CNN2_HUMAN	12855.9	11054.4	7945.75			dirDIA	Q9Y2W1	Q9Y2W1	THRAP3	Thyroid hormone receptor-associated protein 3	Q9Y2W1	TR150_HUMAN	13955.3	10742.7	7777.58
libDIA	Q99460	Q99460	PSMD1	26S proteasome non-ATPase regulatory subunit 1	Q99460	PSMD1_HUMAN	3317.54	7650.77	3249.3			dirDIA	Q9Y383	Q9Y383	LUC7L2	Putative RNA-binding protein Luc7-like 2	Q9Y383	LC7L2_HUMAN	2529.05	4549.41	1990.32
libDIA	Q99471	Q99471	PFDN5	Prefoldin subunit 5	Q99471	PFD5_HUMAN	Filtered	3911.42	2646.6			dirDIA	Q9Y3U8	Q9Y3U8	RPL36	60S ribosomal protein L36	Q9Y3U8	RL36_HUMAN	5321.15	6593.55	3367.4
libDIA	Q99497	Q99497	PARK7	Protein deglycase DJ-1	Q99497	PARK7_HUMAN	41454.2	54551.9	16416.2			dirDIA	Q9Y3Z3	Q9Y3Z3	SAMHD1	Deoxynucleoside triphosphate triphosphohydrolase SAMHD1	Q9Y3Z3	SAMH1_HUMAN	16370.2	15216.5	6439.82
libDIA	Q99614	Q99614	TTC1	Tetratricopeptide repeat protein 1	Q99614	TTC1_HUMAN	7367.95	9805.23	6574.99			dirDIA	Q9Y490	Q9Y490	TLN1	Talin-1	Q9Y490	TLN1_HUMAN	3448.61	4300.58	3895.75
libDIA	Q99623	Q99623	PHB2	Prohibitin-2	Q99623	PHB2_HUMAN	35841.8	35943.5	30165.4			dirDIA	Q9Y4L1	Q9Y4L1	HYOU1	Hypoxia up-regulated protein 1	Q9Y4L1	HYOU1_HUMAN	3902.49	4227.31	6374.93
libDIA	Q99714	Q99714	HSD17B10	3-hydroxyacyl-CoA dehydrogenase type-2	Q99714	HCD2_HUMAN	32725.4	26838.3	19772			dirDIA	Q9Y4W6	Q9Y4W6	AFG3L2	AFG3-like protein 2	Q9Y4W6	AFG32_HUMAN	199.775	599.794	2454.27
libDIA	Q99798	Q99798	ACO2	Aconitate hydratase, mitochondrial	Q99798	ACON_HUMAN	6314.07	11180.7	8522.64			dirDIA	Q9Y5B9	Q9Y5B9	SUPT16H	FACT complex subunit SPT16	Q9Y5B9	SP16H_HUMAN	9678.45	11063.2	9207.82
libDIA	Q99805	Q99805	TM9SF2	Transmembrane 9 superfamily member 2	Q99805	TM9S2_HUMAN	Filtered	Filtered	4285.37			dirDIA	Q9Y5K5	Q9Y5K5	UCHL5	Ubiquitin carboxyl-terminal hydrolase isozyme L5	Q9Y5K5	UCHL5_HUMAN	10939.1	13069.7	8970.21
libDIA	Q99829	Q99829	CPNE1	Copine-1	Q99829	CPNE1_HUMAN	Filtered	Filtered	5567.66			dirDIA	Q9Y5L4	Q9Y5L4	TIMM13	Mitochondrial import inner membrane translocase subunit Tim13	Q9Y5L4	TIM13_HUMAN	4423.68	2140	7485.44
libDIA	Q99832	Q99832	CCT7	T-complex protein 1 subunit eta	Q99832	TCPH_HUMAN	13202.4	16416.4	12524.4			dirDIA	Q9Y5M8	Q9Y5M8	SRPRB	Signal recognition particle receptor subunit beta	Q9Y5M8	SRPRB_HUMAN	1457.27	1587.71	1388.26
libDIA	Q99873	Q99873	PRMT1	Protein arginine N-methyltransferase 1	Q99873	ANM1_HUMAN	18133.9	33728	17499.4			dirDIA	Q9Y5S9	Q9Y5S9	RBM8A	RNA-binding protein 8A	Q9Y5S9	RBM8A_HUMAN	3616.41	4749.46	3578.04
libDIA	Q99986	Q99986	VRK1	Serine/threonine-protein kinase VRK1	Q99986	VRK1_HUMAN	Filtered	Filtered	2281.19			dirDIA	Q9Y617	Q9Y617	PSAT1	Phosphoserine aminotransferase	Q9Y617	SERC_HUMAN	11984.7	15064.7	9004.54
libDIA	Q9BPU6	Q9BPU6	DPYSL5	Dihydropyrimidinase-related protein 5	Q9BPU6	DPYL5_HUMAN	Filtered	Filtered	3593.54			dirDIA	Q9Y678	Q9Y678	COPG1	Coatomer subunit gamma-1	Q9Y678	COPG1_HUMAN	8465.03	3405.24	3178.46
libDIA	Q9BPX5	Q9BPX5	ARPC5L	Actin-related protein 2/3 complex subunit 5-like protein	Q9BPX5	ARP5L_HUMAN	7084.04	Filtered	11639.4			dirDIA	Q9Y6A5	Q9Y6A5	TACC3	Transforming acidic coiled-coil-containing protein 3	Q9Y6A5	TACC3_HUMAN	1044.26	1.03144	1199.52
libDIA	Q9BQ04;Q9BWF3	Q9BQ04;Q9BWF3	RBM4B;RBM4	RNA-binding protein 4B;RNA-binding protein 4	Q9BQ04;Q9BWF3	RBM4B_HUMAN;RBM4_HUMAN	Filtered	Filtered	6728.37
libDIA	Q9BRJ6	Q9BRJ6	C7orf50	Uncharacterized protein C7orf50	Q9BRJ6	CG050_HUMAN	5728.36	6293.36	13236.7
libDIA	Q9BS26	Q9BS26	ERP44	Endoplasmic reticulum resident protein 44	Q9BS26	ERP44_HUMAN	22636.7	26786.8	16820.7
libDIA	Q9BTT0	Q9BTT0	ANP32E	Acidic leucine-rich nuclear phosphoprotein 32 family member E	Q9BTT0	AN32E_HUMAN	10109.5	10647.7	14505.3
libDIA	Q9BUL8	Q9BUL8	PDCD10	Programmed cell death protein 10	Q9BUL8	PDC10_HUMAN	Filtered	11006.8	8174.78
libDIA	Q9BVC6	Q9BVC6	TMEM109	Transmembrane protein 109	Q9BVC6	TM109_HUMAN	9151.26	8122.91	12863.3
libDIA	Q9BVK6	Q9BVK6	TMED9	Transmembrane emp24 domain-containing protein 9	Q9BVK6	TMED9_HUMAN	2500.8	Filtered	2236.59
libDIA	Q9BVP2	Q9BVP2	GNL3	Guanine nucleotide-binding protein-like 3	Q9BVP2	GNL3_HUMAN	Filtered	Filtered	7833.28
libDIA	Q9BWD1	Q9BWD1	ACAT2	Acetyl-CoA acetyltransferase, cytosolic	Q9BWD1	THIC_HUMAN	Filtered	Filtered	7073.44
libDIA	Q9BXP5	Q9BXP5	SRRT	Serrate RNA effector molecule homolog	Q9BXP5	SRRT_HUMAN	5654.82	6119.66	4859.41
libDIA	Q9BY77	Q9BY77	POLDIP3	Polymerase delta-interacting protein 3	Q9BY77	PDIP3_HUMAN	Filtered	Filtered	1840.75
libDIA	Q9BZD4	Q9BZD4	NUF2	Kinetochore protein Nuf2	Q9BZD4	NUF2_HUMAN	Filtered	12446.6	Filtered
libDIA	Q9BZK7	Q9BZK7	TBL1XR1	F-box-like/WD repeat-containing protein TBL1XR1	Q9BZK7	TBL1R_HUMAN	Filtered	4890.84	3191.36
libDIA	Q9BZZ5	Q9BZZ5	API5	Apoptosis inhibitor 5	Q9BZZ5	API5_HUMAN	8240.16	10472.6	8051.93
libDIA	Q9C0B2	Q9C0B2	CFAP74	Cilia- and flagella-associated protein 74	Q9C0B2	CFA74_HUMAN	69711.9	139768	71479.6
libDIA	Q9GZT3	Q9GZT3	SLIRP	SRA stem-loop-interacting RNA-binding protein, mitochondrial	Q9GZT3	SLIRP_HUMAN	4993.67	15840.6	14643.9
libDIA	Q9GZZ1	Q9GZZ1	NAA50	N-alpha-acetyltransferase 50	Q9GZZ1	NAA50_HUMAN	Filtered	Filtered	5154.21
libDIA	Q9H0A0	Q9H0A0	NAT10	N-acetyltransferase 10	Q9H0A0	NAT10_HUMAN	4258.34	5492.55	8439.45
libDIA	Q9H223	Q9H223	EHD4	EH domain-containing protein 4	Q9H223	EHD4_HUMAN	Filtered	Filtered	4323.93
libDIA	Q9H2U2	Q9H2U2	PPA2	Inorganic pyrophosphatase 2, mitochondrial	Q9H2U2	IPYR2_HUMAN	7842.83	7891.68	4225.85
libDIA	Q9H3K6	Q9H3K6	BOLA2	BolA-like protein 2	Q9H3K6	BOLA2_HUMAN	11752.3	13237.7	13664.3
libDIA	Q9H4M9	Q9H4M9	EHD1	EH domain-containing protein 1	Q9H4M9	EHD1_HUMAN	Filtered	Filtered	1396.01
libDIA	Q9H583	Q9H583	HEATR1	HEAT repeat-containing protein 1	Q9H583	HEAT1_HUMAN	Filtered	Filtered	4438.8
libDIA	Q9H8W5	Q9H8W5	TRIM45	Tripartite motif-containing protein 45	Q9H8W5	TRI45_HUMAN	Filtered	Filtered	5211.85
libDIA	Q9H910	Q9H910	HN1L	Hematological and neurological expressed 1-like protein	Q9H910	HN1L_HUMAN	Filtered	8404.63	4283.01
libDIA	Q9H9B4	Q9H9B4	SFXN1	Sideroflexin-1	Q9H9B4	SFXN1_HUMAN	9341.48	10548.2	9093.99
libDIA	Q9HAU5	Q9HAU5	UPF2	Regulator of nonsense transcripts 2	Q9HAU5	RENT2_HUMAN	52357.8	71632.7	73357
libDIA	Q9HAV4	Q9HAV4	XPO5	Exportin-5	Q9HAV4	XPO5_HUMAN	45684.7	32846.4	44784.7
libDIA	Q9HAV7	Q9HAV7	GRPEL1	GrpE protein homolog 1, mitochondrial	Q9HAV7	GRPE1_HUMAN	3997.7	Filtered	1808.4
libDIA	Q9HB71	Q9HB71	CACYBP	Calcyclin-binding protein	Q9HB71	CYBP_HUMAN	573356	216594	3935.23
libDIA	Q9HD42	Q9HD42	CHMP1A	Charged multivesicular body protein 1a	Q9HD42	CHM1A_HUMAN	Filtered	Filtered	349913
libDIA	Q9NPJ3	Q9NPJ3	ACOT13	Acyl-coenzyme A thioesterase 13	Q9NPJ3	ACO13_HUMAN	Filtered	6336.91	4987.22
libDIA	Q9NQC3	Q9NQC3	RTN4	Reticulon-4	Q9NQC3	RTN4_HUMAN	13895	23880.3	18440.7
libDIA	Q9NR28	Q9NR28	DIABLO	Diablo homolog, mitochondrial	Q9NR28	DBLOH_HUMAN	Filtered	Filtered	2541.45
libDIA	Q9NR30	Q9NR30	DDX21	Nucleolar RNA helicase 2	Q9NR30	DDX21_HUMAN	37319	52411.3	40265.8
libDIA	Q9NR31	Q9NR31	SAR1A	GTP-binding protein SAR1a	Q9NR31	SAR1A_HUMAN	11492.5	8139.56	10596.1
libDIA	Q9NSD9	Q9NSD9	FARSB	Phenylalanine--tRNA ligase beta subunit	Q9NSD9	SYFB_HUMAN	8889.65	8216.99	8760.12
libDIA	Q9NTJ3	Q9NTJ3	SMC4	Structural maintenance of chromosomes protein 4	Q9NTJ3	SMC4_HUMAN	4146.58	8456.34	6078.71
libDIA	Q9NTK5	Q9NTK5	OLA1	Obg-like ATPase 1	Q9NTK5	OLA1_HUMAN	Filtered	Filtered	9948.19
libDIA	Q9NVP1	Q9NVP1	DDX18	ATP-dependent RNA helicase DDX18	Q9NVP1	DDX18_HUMAN	Filtered	Filtered	3656.56
libDIA	Q9NX24	Q9NX24	NHP2	H/ACA ribonucleoprotein complex subunit 2	Q9NX24	NHP2_HUMAN	Filtered	Filtered	4316.16
libDIA	Q9NX40	Q9NX40	OCIAD1	OCIA domain-containing protein 1	Q9NX40	OCAD1_HUMAN	Filtered	27540.2	Filtered
libDIA	Q9NX63	Q9NX63	CHCHD3	MICOS complex subunit MIC19	Q9NX63	MIC19_HUMAN	5575.26	3928.33	Filtered
libDIA	Q9NYL4	Q9NYL4	FKBP11	Peptidyl-prolyl cis-trans isomerase FKBP11	Q9NYL4	FKB11_HUMAN	Filtered	Filtered	4119.37
libDIA	Q9NZ01	Q9NZ01	TECR	Very-long-chain enoyl-CoA reductase	Q9NZ01	TECR_HUMAN	Filtered	Filtered	1638.71
libDIA	Q9NZ08	Q9NZ08	ERAP1	Endoplasmic reticulum aminopeptidase 1	Q9NZ08	ERAP1_HUMAN	Filtered	7883.87	3997.49
libDIA	Q9NZL9	Q9NZL9	MAT2B	Methionine adenosyltransferase 2 subunit beta	Q9NZL9	MAT2B_HUMAN	Filtered	Filtered	6417.56
libDIA	Q9NZM3	Q9NZM3	ITSN2	Intersectin-2	Q9NZM3	ITSN2_HUMAN	Filtered	107936	91509.8
libDIA	Q9P016	Q9P016	THYN1	Thymocyte nuclear protein 1	Q9P016	THYN1_HUMAN	Filtered	Filtered	7478.5
libDIA	Q9P035	Q9P035	HACD3	Very-long-chain (3R)-3-hydroxyacyl-CoA dehydratase 3	Q9P035	HACD3_HUMAN	Filtered	Filtered	3808.52
libDIA	Q9P209	Q9P209	CEP72	Centrosomal protein of 72 kDa	Q9P209	CEP72_HUMAN	Filtered	Filtered	67279.8
libDIA	Q9P258	Q9P258	RCC2	Protein RCC2	Q9P258	RCC2_HUMAN	13053	3034.54	14217.8
libDIA	Q9P2J5	Q9P2J5	LARS	Leucine--tRNA ligase, cytoplasmic	Q9P2J5	SYLC_HUMAN	Filtered	Filtered	2420.17
libDIA	Q9UBQ5	Q9UBQ5	EIF3K	Eukaryotic translation initiation factor 3 subunit K	Q9UBQ5	EIF3K_HUMAN	11675.4	13886.1	11482.9
libDIA	Q9UBQ7	Q9UBQ7	GRHPR	Glyoxylate reductase/hydroxypyruvate reductase	Q9UBQ7	GRHPR_HUMAN	Filtered	2967.41	2596.82
libDIA	Q9UBS4	Q9UBS4	DNAJB11	DnaJ homolog subfamily B member 11	Q9UBS4	DJB11_HUMAN	8001.17	16570.4	14822.4
libDIA	Q9UBT2	Q9UBT2	UBA2	SUMO-activating enzyme subunit 2	Q9UBT2	SAE2_HUMAN	Filtered	7687.42	3831.3
libDIA	Q9UBX3	Q9UBX3	SLC25A10	Mitochondrial dicarboxylate carrier	Q9UBX3	DIC_HUMAN	Filtered	6527.36	5413.24
libDIA	Q9UHB9	Q9UHB9	SRP68	Signal recognition particle subunit SRP68	Q9UHB9	SRP68_HUMAN	7070.18	5977.12	3890.36
libDIA	Q9UHD8	Q9UHD8	2020-09-09	Septin-9	Q9UHD8	SEPT9_HUMAN	11701	14402.6	10149.5
libDIA	Q9UHX1	Q9UHX1	PUF60	Poly(U)-binding-splicing factor PUF60	Q9UHX1	PUF60_HUMAN	Filtered	4608.03	4854.44
libDIA	Q9UHY7	Q9UHY7	ENOPH1	Enolase-phosphatase E1	Q9UHY7	ENOPH_HUMAN	Filtered	Filtered	2421.51
libDIA	Q9UJU6	Q9UJU6	DBNL	Drebrin-like protein	Q9UJU6	DBNL_HUMAN	5234.71	4277.06	4140.99
libDIA	Q9UK45	Q9UK45	LSM7	U6 snRNA-associated Sm-like protein LSm7	Q9UK45	LSM7_HUMAN	Filtered	Filtered	15621.1
libDIA	Q9UKD2	Q9UKD2	MRTO4	mRNA turnover protein 4 homolog	Q9UKD2	MRT4_HUMAN	10358.5	10991	14154.6
libDIA	Q9UKK9	Q9UKK9	NUDT5	ADP-sugar pyrophosphatase	Q9UKK9	NUDT5_HUMAN	Filtered	Filtered	5500.06
libDIA	Q9UKM9	Q9UKM9	RALY	RNA-binding protein Raly	Q9UKM9	RALY_HUMAN	6206.12	54814.8	71693.1
libDIA	Q9UKV3	Q9UKV3	ACIN1	Apoptotic chromatin condensation inducer in the nucleus	Q9UKV3	ACINU_HUMAN	Filtered	Filtered	3397.15
libDIA	Q9UL46	Q9UL46	PSME2	Proteasome activator complex subunit 2	Q9UL46	PSME2_HUMAN	10770.4	8728.19	5216.47
libDIA	Q9ULW0	Q9ULW0	TPX2	Targeting protein for Xklp2	Q9ULW0	TPX2_HUMAN	Filtered	Filtered	1857.34
libDIA	Q9UMS4	Q9UMS4	PRPF19	Pre-mRNA-processing factor 19	Q9UMS4	PRP19_HUMAN	9483.84	11492.3	10208.3
libDIA	Q9UNM6	Q9UNM6	PSMD13	26S proteasome non-ATPase regulatory subunit 13	Q9UNM6	PSD13_HUMAN	Filtered	9716.37	2956.3
libDIA	Q9UQ35	Q9UQ35	SRRM2	Serine/arginine repetitive matrix protein 2	Q9UQ35	SRRM2_HUMAN	9133.74	9386.13	5540.63
libDIA	Q9UQ80	Q9UQ80	PA2G4	Proliferation-associated protein 2G4	Q9UQ80	PA2G4_HUMAN	38517.5	42257	38390.2
libDIA	Q9Y230	Q9Y230	RUVBL2	RuvB-like 2	Q9Y230	RUVB2_HUMAN	19761.1	22691.1	19466.3
libDIA	Q9Y265	Q9Y265	RUVBL1	RuvB-like 1	Q9Y265	RUVB1_HUMAN	21540.3	27167.1	17845
libDIA	Q9Y266	Q9Y266	NUDC	Nuclear migration protein nudC	Q9Y266	NUDC_HUMAN	15748.9	17355.5	9750.77
libDIA	Q9Y277	Q9Y277	VDAC3	Voltage-dependent anion-selective channel protein 3	Q9Y277	VDAC3_HUMAN	9034.57	8967.08	7332.73
libDIA	Q9Y285	Q9Y285	FARSA	Phenylalanine--tRNA ligase alpha subunit	Q9Y285	SYFA_HUMAN	Filtered	Filtered	5158.46
libDIA	Q9Y295	Q9Y295	DRG1	Developmentally-regulated GTP-binding protein 1	Q9Y295	DRG1_HUMAN	Filtered	Filtered	3372.52
libDIA	Q9Y2Q9	Q9Y2Q9	MRPS28	28S ribosomal protein S28, mitochondrial	Q9Y2Q9	RT28_HUMAN	Filtered	Filtered	5159.55
libDIA	Q9Y2W1	Q9Y2W1	THRAP3	Thyroid hormone receptor-associated protein 3	Q9Y2W1	TR150_HUMAN	36245.3	24573.9	14295.1
libDIA	Q9Y333	Q9Y333	LSM2	U6 snRNA-associated Sm-like protein LSm2	Q9Y333	LSM2_HUMAN	Filtered	Filtered	1931.79
libDIA	Q9Y383	Q9Y383	LUC7L2	Putative RNA-binding protein Luc7-like 2	Q9Y383	LC7L2_HUMAN	Filtered	5416.98	2230.02
libDIA	Q9Y3B9	Q9Y3B9	RRP15	RRP15-like protein	Q9Y3B9	RRP15_HUMAN	Filtered	Filtered	1103.1
libDIA	Q9Y3D8	Q9Y3D8	AK6	Adenylate kinase isoenzyme 6	Q9Y3D8	KAD6_HUMAN	Filtered	Filtered	5561.68
libDIA	Q9Y3D9	Q9Y3D9	MRPS23	28S ribosomal protein S23, mitochondrial	Q9Y3D9	RT23_HUMAN	Filtered	Filtered	6257.29
libDIA	Q9Y3I0	Q9Y3I0	RTCB	tRNA-splicing ligase RtcB homolog	Q9Y3I0	RTCB_HUMAN	Filtered	4804.07	3904.34
libDIA	Q9Y3U8	Q9Y3U8	RPL36	60S ribosomal protein L36	Q9Y3U8	RL36_HUMAN	Filtered	Filtered	9633.19
libDIA	Q9Y490	Q9Y490	TLN1	Talin-1	Q9Y490	TLN1_HUMAN	5368.3	6514.52	5434
libDIA	Q9Y4L1	Q9Y4L1	HYOU1	Hypoxia up-regulated protein 1	Q9Y4L1	HYOU1_HUMAN	Filtered	Filtered	11409
libDIA	Q9Y4W6	Q9Y4W6	AFG3L2	AFG3-like protein 2	Q9Y4W6	AFG32_HUMAN	Filtered	Filtered	3249.41
libDIA	Q9Y4Z0	Q9Y4Z0	LSM4	U6 snRNA-associated Sm-like protein LSm4	Q9Y4Z0	LSM4_HUMAN	Filtered	Filtered	2305.04
libDIA	Q9Y5B9	Q9Y5B9	SUPT16H	FACT complex subunit SPT16	Q9Y5B9	SP16H_HUMAN	7934.25	10068.1	9719.1
libDIA	Q9Y5K5	Q9Y5K5	UCHL5	Ubiquitin carboxyl-terminal hydrolase isozyme L5	Q9Y5K5	UCHL5_HUMAN	10627.4	13377.3	4171.02
libDIA	Q9Y5L4	Q9Y5L4	TIMM13	Mitochondrial import inner membrane translocase subunit Tim13	Q9Y5L4	TIM13_HUMAN	4864.53	3460.98	8432.8
libDIA	Q9Y5M8	Q9Y5M8	SRPRB	Signal recognition particle receptor subunit beta	Q9Y5M8	SRPRB_HUMAN	Filtered	Filtered	3073.03
libDIA	Q9Y5S9	Q9Y5S9	RBM8A	RNA-binding protein 8A	Q9Y5S9	RBM8A_HUMAN	3524.86	5039.15	8542.66
libDIA	Q9Y5X3	Q9Y5X3	SNX5	Sorting nexin-5	Q9Y5X3	SNX5_HUMAN	Filtered	Filtered	1917
libDIA	Q9Y617	Q9Y617	PSAT1	Phosphoserine aminotransferase	Q9Y617	SERC_HUMAN	10089.5	10740	7253.04
libDIA	Q9Y6A5	Q9Y6A5	TACC3	Transforming acidic coiled-coil-containing protein 3	Q9Y6A5	TACC3_HUMAN	Filtered	Filtered	1217.45
libDIA	Q9Y6C9	Q9Y6C9	MTCH2	Mitochondrial carrier homolog 2	Q9Y6C9	MTCH2_HUMAN	Filtered	Filtered	7608.62

## Sheet: MEC1_117 cells
libDIA-Protein Groups IDs												dirDIA-Protein Groups IDs
Source	PG.ProteinGroups	PG.ProteinAccessions	PG.Genes	PG.ProteinDescriptions	PG.UniProtIds	PG.ProteinNames	[1] 20201112_MEC1-MF-100cells-Eclipse-DIA-01.raw.PG.Quantity	[2] 20201112_MEC1-MF-100cells-Eclipse-DIA-02.raw.PG.Quantity	[3] 20201112_MEC1-MF-100cells-Eclipse-DIA-03.raw.PG.Quantity			Source	PG.ProteinGroups	PG.ProteinAccessions	PG.Genes	PG.ProteinDescriptions	PG.UniProtIds	PG.ProteinNames	[1] 20201112_MEC1-MF-100cells-Eclipse-DIA-01.raw.PG.Quantity	[2] 20201112_MEC1-MF-100cells-Eclipse-DIA-02.raw.PG.Quantity	[3] 20201112_MEC1-MF-100cells-Eclipse-DIA-03.raw.PG.Quantity
libDIA	A0AV96	A0AV96	RBM47	RNA-binding protein 47	A0AV96	RBM47_HUMAN	Filtered	3362.6	3457.2			dirDIA	A0AVT1	A0AVT1	UBA6	Ubiquitin-like modifier-activating enzyme 6	A0AVT1	UBA6_HUMAN	12827.7	18378.9	17838.4
libDIA	A0AVT1	A0AVT1	UBA6	Ubiquitin-like modifier-activating enzyme 6	A0AVT1	UBA6_HUMAN	7990.2	10007.5	8911.37			dirDIA	A1L4H1	A1L4H1	SSC5D	Soluble scavenger receptor cysteine-rich domain-containing protein SSC5D	A1L4H1	SRCRL_HUMAN	52434.4	35800.9	39667.3
libDIA	A0FGR8	A0FGR8	ESYT2	Extended synaptotagmin-2	A0FGR8	ESYT2_HUMAN	3370.29	2496.33	2708.19			dirDIA	A4D1E9	A4D1E9	GTPBP10	GTP-binding protein 10	A4D1E9	GTPBA_HUMAN	5509.42	8905.33	11414.3
libDIA	A0PJW6	A0PJW6	TMEM223	Transmembrane protein 223	A0PJW6	TM223_HUMAN	Filtered	3823.53	2968.92			dirDIA	A5A3E0	A5A3E0	POTEF	POTE ankyrin domain family member F	A5A3E0	POTEF_HUMAN	2394599	2.71036e+06	2.19819e+06
libDIA	A1L0T0	A1L0T0	ILVBL	Acetolactate synthase-like protein	A1L0T0	ILVBL_HUMAN	Filtered	1699.67	Filtered			dirDIA	A5YKK6	A5YKK6	CNOT1	CCR4-NOT transcription complex subunit 1	A5YKK6	CNOT1_HUMAN	6213.8	12892.2	12850.6
libDIA	A2RRD8;A6NN14;A6NP11;A8MT65;B4DXR9;O14628;O60765;O75346;P0CB33;P0CJ79;P17035;P17039;P59923;Q03936;Q03938;Q08AN1;Q15928;Q15929;Q3MIS6;Q3SXZ3;Q5FWF6;Q5HY98;Q5JVG8;Q5VIY5;Q6ZN06;Q6ZN08;Q76KX8;Q7L2R6;Q86XN6;Q86XU0;Q86YE8;Q8IW36;Q8IYB9;Q8IYX0;Q8N859;Q8N9Z0;Q8NB42;Q8TB69;Q8WV37;Q96H40;Q96IR2;Q96JC4;Q96JL9;Q96LW1;Q96SE7;Q9HBT8;Q9NV72;Q9P2J8;Q9Y2Q1	A2RRD8;A6NN14;A6NP11;A8MT65;B4DXR9;O14628;O60765;O75346;P0CB33;P0CJ79;P17035;P17039;P59923;Q03936;Q03938;Q08AN1;Q15928;Q15929;Q3MIS6;Q3SXZ3;Q5FWF6;Q5HY98;Q5JVG8;Q5VIY5;Q6ZN06;Q6ZN08;Q76KX8;Q7L2R6;Q86XN6;Q86XU0;Q86YE8;Q8IW36;Q8IYB9;Q8IYX0;Q8N859;Q8N9Z0;Q8NB42;Q8TB69;Q8WV37;Q96H40;Q96IR2;Q96JC4;Q96JL9;Q96LW1;Q96SE7;Q9HBT8;Q9NV72;Q9P2J8;Q9Y2Q1	ZNF320;ZNF729;ZNF716;ZNF891;ZNF732;ZNF195;ZNF354A;ZNF253;ZNF735;ZNF888;ZNF28;ZNF30;ZNF445;ZNF92;ZNF90;ZNF616;ZNF141;ZNF56;ZNF528;ZNF718;ZNF789;ZNF766;ZNF506;ZNF468;ZNF813;ZNF66;ZNF534;ZNF765;ZNF761;ZNF677;ZNF573;ZNF695;ZNF595;ZNF679;ZNF713;ZNF610;ZNF527;ZNF519;ZNF480;ZNF486;ZNF845;ZNF479;ZNF333;ZNF354B;ZNF347;ZNF286A;ZNF701;ZNF624;ZNF257	Zinc finger protein 320;Zinc finger protein 729;Zinc finger protein 716;Zinc finger protein 891;Zinc finger protein 732;Zinc finger protein 195;Zinc finger protein 354A;Zinc finger protein 253;Putative zinc finger protein 735;Zinc finger protein 888;Zinc finger protein 28;Zinc finger protein 30;Zinc finger protein 445;Zinc finger protein 92;Zinc finger protein 90;Zinc finger protein 616;Zinc fing…	A2RRD8;A6NN14;A6NP11;A8MT65;B4DXR9;O14628;O60765;O75346;P0CB33;P0CJ79;P17035;P17039;P59923;Q03936;Q03938;Q08AN1;Q15928;Q15929;Q3MIS6;Q3SXZ3;Q5FWF6;Q5HY98;Q5JVG8;Q5VIY5;Q6ZN06;Q6ZN08;Q76KX8;Q7L2R6;Q86XN6;Q86XU0;Q86YE8;Q8IW36;Q8IYB9;Q8IYX0;Q8N859;Q8N9Z0;Q8NB42;Q8TB69;Q8WV37;Q96H40;Q96IR2;Q96JC4;Q96JL9;Q96LW1;Q96SE7;Q9HBT8;Q9NV72;Q9P2J8;Q9Y2Q1	ZN320_HUMAN;ZN729_HUMAN;ZN716_HUMAN;ZN891_HUMAN;ZN732_HUMAN;ZN195_HUMAN;Z354A_HUMAN;ZN253_HUMAN;ZN735_HUMAN;ZN888_HUMAN;ZNF28_HUMAN;ZNF30_HUMAN;ZN445_HUMAN;ZNF92_HUMAN;ZNF90_HUMAN;ZN616_HUMAN;ZN141_HUMAN;ZNF56_HUMAN;ZN528_HUMAN;ZN718_HUMAN;ZN789_HUMAN;ZN766_HUMAN;ZN506_HUMAN;ZN468_HUMAN;ZN813_HUMAN;ZNF66_HUMAN;ZN534_HUMAN;ZN765_HUMAN;ZN761_HUMAN;ZN677_HUMAN;ZN573_HUMAN;ZN695_HUMAN;ZN595_HUMAN;ZN6…	Filtered	1809.73	2200.99			dirDIA	A6NCE7;Q9GZQ8;Q9H492	A6NCE7;Q9GZQ8;Q9H492	MAP1LC3B2;MAP1LC3B;MAP1LC3A	Microtubule-associated proteins 1A/1B light chain 3 beta 2;Microtubule-associated proteins 1A/1B light chain 3B;Microtubule-associated proteins 1A/1B light chain 3A	A6NCE7;Q9GZQ8;Q9H492	MP3B2_HUMAN;MLP3B_HUMAN;MLP3A_HUMAN	24084.4	24164.7	22555.8
libDIA	A2VDJ0	A2VDJ0	KIAA0922	Transmembrane protein 131-like	A2VDJ0	T131L_HUMAN	1	1293.81	1060.21			dirDIA	A6NDG6	A6NDG6	PGP	Phosphoglycolate phosphatase	A6NDG6	PGP_HUMAN	23743.6	18823.2	19110.3
libDIA	A3KMH1	A3KMH1	VWA8	von Willebrand factor A domain-containing protein 8	A3KMH1	VWA8_HUMAN	Filtered	4917.2	4104.15			dirDIA	A6NHG4;P30046	A6NHG4;P30046	DDTL;DDT	D-dopachrome decarboxylase-like protein;D-dopachrome decarboxylase	A6NHG4;P30046	DDTL_HUMAN;DOPD_HUMAN	56274.8	35542.9	29693.3
libDIA	A3KN83	A3KN83	SBNO1	Protein strawberry notch homolog 1	A3KN83	SBNO1_HUMAN	4500.6	3548.11	3700.63			dirDIA	A6NHR9	A6NHR9	SMCHD1	Structural maintenance of chromosomes flexible hinge domain-containing protein 1	A6NHR9	SMHD1_HUMAN	3852.31	7682.22	9112.59
libDIA	A4D1E9	A4D1E9	GTPBP10	GTP-binding protein 10	A4D1E9	GTPBA_HUMAN	Filtered	210.519	748.936			dirDIA	A6NHT5	A6NHT5	HMX3	Homeobox protein HMX3	A6NHT5	HMX3_HUMAN	1.67136	1885.84	2859.87
libDIA	A5A3E0	A5A3E0	POTEF	POTE ankyrin domain family member F	A5A3E0	POTEF_HUMAN	2.23539e+06	2.53039e+06	2.06881e+06			dirDIA	A6NI72;P14598	A6NI72;P14598	NCF1B;NCF1	Putative neutrophil cytosol factor 1B;Neutrophil cytosol factor 1	A6NI72;P14598	NCF1B_HUMAN;NCF1_HUMAN	71564.6	70472.6	71210.2
libDIA	A5YKK6	A5YKK6	CNOT1	CCR4-NOT transcription complex subunit 1	A5YKK6	CNOT1_HUMAN	6860.27	13541.4	13466.3			dirDIA	A8MWD9;P62308	A8MWD9;P62308	SNRPGP15;SNRPG	Putative small nuclear ribonucleoprotein G-like protein 15;Small nuclear ribonucleoprotein G	A8MWD9;P62308	RUXGL_HUMAN;RUXG_HUMAN	45270.4	38966.6	37996.7
libDIA	A6NC98	A6NC98	CCDC88B	Coiled-coil domain-containing protein 88B	A6NC98	CC88B_HUMAN	Filtered	2922.79	2114.77			dirDIA	A8MXV4	A8MXV4	NUDT19	Nucleoside diphosphate-linked moiety X motif 19	A8MXV4	NUD19_HUMAN	Filtered	6308.56	7823.51
libDIA	A6NCE7;Q9GZQ8;Q9H492	A6NCE7;Q9GZQ8;Q9H492	MAP1LC3B2;MAP1LC3B;MAP1LC3A	Microtubule-associated proteins 1A/1B light chain 3 beta 2;Microtubule-associated proteins 1A/1B light chain 3B;Microtubule-associated proteins 1A/1B light chain 3A	A6NCE7;Q9GZQ8;Q9H492	MP3B2_HUMAN;MLP3B_HUMAN;MLP3A_HUMAN	28638.8	30018.7	28317.1			dirDIA	B0I1T2	B0I1T2	MYO1G	Unconventional myosin-Ig	B0I1T2	MYO1G_HUMAN	90258	103075	92604.9
libDIA	A6NCM1	A6NCM1	IQCA1L	IQ and AAA domain-containing protein 1-like	A6NCM1	IQCAL_HUMAN	Filtered	8991.8	8824.46			dirDIA	B5ME19;Q99613	B5ME19;Q99613	EIF3CL;EIF3C	Eukaryotic translation initiation factor 3 subunit C-like protein;Eukaryotic translation initiation factor 3 subunit C	B5ME19;Q99613	EIFCL_HUMAN;EIF3C_HUMAN	74841.1	81034	85053.8
libDIA	A6NDG6	A6NDG6	PGP	Phosphoglycolate phosphatase	A6NDG6	PGP_HUMAN	24530.6	19487.7	20081			dirDIA	E9PAV3;Q13765	E9PAV3;Q13765	NACA	Nascent polypeptide-associated complex subunit alpha, muscle-specific form;Nascent polypeptide-associated complex subunit alpha	E9PAV3;Q13765	NACAM_HUMAN;NACA_HUMAN	210042	156842	146056
libDIA	A6NHR9	A6NHR9	SMCHD1	Structural maintenance of chromosomes flexible hinge domain-containing protein 1	A6NHR9	SMHD1_HUMAN	7796.21	9943.45	9155.25			dirDIA	E9PRG8	E9PRG8	C11orf98	Uncharacterized protein C11orf98	E9PRG8	CK098_HUMAN	72161.7	89836.3	77838.8
libDIA	A6NHT5	A6NHT5	HMX3	Homeobox protein HMX3	A6NHT5	HMX3_HUMAN	Filtered	2644.06	2731.24			dirDIA	O00115	O00115	DNASE2	Deoxyribonuclease-2-alpha	O00115	DNS2A_HUMAN	40786.2	20809.8	24562.6
libDIA	A6NI72;P14598	A6NI72;P14598	NCF1B;NCF1	Putative neutrophil cytosol factor 1B;Neutrophil cytosol factor 1	A6NI72;P14598	NCF1B_HUMAN;NCF1_HUMAN	72266.1	71551.5	71936.1			dirDIA	O00116	O00116	AGPS	Alkyldihydroxyacetonephosphate synthase, peroxisomal	O00116	ADAS_HUMAN	4568.15	4594.22	3771.3
libDIA	A6NIH7	A6NIH7	UNC119B	Protein unc-119 homolog B	A6NIH7	U119B_HUMAN	4964.21	5357.94	6679.37			dirDIA	O00139	O00139	KIF2A	Kinesin-like protein KIF2A	O00139	KIF2A_HUMAN	21535.6	30198.5	36586.6
libDIA	A6NJ78	A6NJ78	METTL15	Probable methyltransferase-like protein 15	A6NJ78	MET15_HUMAN	3067.42	1587.15	1616.72			dirDIA	O00148	O00148	DDX39A	ATP-dependent RNA helicase DDX39A	O00148	DX39A_HUMAN	222396	253749	265576
libDIA	A8CG34	A8CG34	POM121C	Nuclear envelope pore membrane protein POM 121C	A8CG34	P121C_HUMAN	5743.91	6062.05	6486.84			dirDIA	O00151	O00151	PDLIM1	PDZ and LIM domain protein 1	O00151	PDLI1_HUMAN	245691	184125	167721
libDIA	A8MWD9;P62308	A8MWD9;P62308	SNRPGP15;SNRPG	Putative small nuclear ribonucleoprotein G-like protein 15;Small nuclear ribonucleoprotein G	A8MWD9;P62308	RUXGL_HUMAN;RUXG_HUMAN	45841.8	36067.8	40338.5			dirDIA	O00154	O00154	ACOT7	Cytosolic acyl coenzyme A thioester hydrolase	O00154	BACH_HUMAN	73812.6	83792.2	77006.4
libDIA	A8MXV4	A8MXV4	NUDT19	Nucleoside diphosphate-linked moiety X motif 19	A8MXV4	NUD19_HUMAN	Filtered	5961.62	6705.52			dirDIA	O00161	O00161	SNAP23	Synaptosomal-associated protein 23	O00161	SNP23_HUMAN	19069.8	14207.2	12302
libDIA	B0I1T2	B0I1T2	MYO1G	Unconventional myosin-Ig	B0I1T2	MYO1G_HUMAN	77926.8	84110	74742.2			dirDIA	O00165	O00165	HAX1	HCLS1-associated protein X-1	O00165	HAX1_HUMAN	10177.3	10474.2	8841.3
libDIA	C4AMC7;Q6VEQ5	C4AMC7;Q6VEQ5	WASH3P;WASH2P	Putative WAS protein family homolog 3;WAS protein family homolog 2	C4AMC7;Q6VEQ5	WASH3_HUMAN;WASH2_HUMAN	Filtered	5980.62	2555.08			dirDIA	O00170	O00170	AIP	AH receptor-interacting protein	O00170	AIP_HUMAN	33907.4	29287	29601.7
libDIA	E9PAV3;Q13765	E9PAV3;Q13765	NACA	Nascent polypeptide-associated complex subunit alpha, muscle-specific form;Nascent polypeptide-associated complex subunit alpha	E9PAV3;Q13765	NACAM_HUMAN;NACA_HUMAN	92945.1	82284.8	80175.4			dirDIA	O00178	O00178	GTPBP1	GTP-binding protein 1	O00178	GTPB1_HUMAN	30032.3	25705.8	22108.8
libDIA	E9PRG8	E9PRG8	C11orf98	Uncharacterized protein C11orf98	E9PRG8	CK098_HUMAN	72428.5	46223.2	78333.7			dirDIA	O00186	O00186	STXBP3	Syntaxin-binding protein 3	O00186	STXB3_HUMAN	3833.37	5285.85	4184.83
libDIA	O00115	O00115	DNASE2	Deoxyribonuclease-2-alpha	O00115	DNS2A_HUMAN	39083.1	19481.1	22458.4			dirDIA	O00203	O00203	AP3B1	AP-3 complex subunit beta-1	O00203	AP3B1_HUMAN	19478.8	21228.7	18897
libDIA	O00116	O00116	AGPS	Alkyldihydroxyacetonephosphate synthase, peroxisomal	O00116	ADAS_HUMAN	3642.21	4506.4	3860.66			dirDIA	O00231	O00231	PSMD11	26S proteasome non-ATPase regulatory subunit 11	O00231	PSD11_HUMAN	41555	47208.7	56490.8
libDIA	O00139	O00139	KIF2A	Kinesin-like protein KIF2A	O00139	KIF2A_HUMAN	28082.3	27466.6	33076.8			dirDIA	O00232	O00232	PSMD12	26S proteasome non-ATPase regulatory subunit 12	O00232	PSD12_HUMAN	48512.7	41876.1	49491
libDIA	O00148	O00148	DDX39A	ATP-dependent RNA helicase DDX39A	O00148	DX39A_HUMAN	221908	254836	266165			dirDIA	O00233	O00233	PSMD9	26S proteasome non-ATPase regulatory subunit 9	O00233	PSMD9_HUMAN	42949.6	25214.9	25873.4
libDIA	O00151	O00151	PDLIM1	PDZ and LIM domain protein 1	O00151	PDLI1_HUMAN	233829	178003	163091			dirDIA	O00244	O00244	ATOX1	Copper transport protein ATOX1	O00244	ATOX1_HUMAN	35459.8	18025.9	16102.3
libDIA	O00154	O00154	ACOT7	Cytosolic acyl coenzyme A thioester hydrolase	O00154	BACH_HUMAN	46835	73791.8	73720			dirDIA	O00264	O00264	PGRMC1	Membrane-associated progesterone receptor component 1	O00264	PGRC1_HUMAN	24329.1	29795.5	28563.1
libDIA	O00159	O00159	MYO1C	Unconventional myosin-Ic	O00159	MYO1C_HUMAN	Filtered	2760.77	2445.71			dirDIA	O00267	O00267	SUPT5H	Transcription elongation factor SPT5	O00267	SPT5H_HUMAN	24070.4	25133.7	23179.5
libDIA	O00161	O00161	SNAP23	Synaptosomal-associated protein 23	O00161	SNP23_HUMAN	18422.6	13710.8	12046.6			dirDIA	O00268	O00268	TAF4	Transcription initiation factor TFIID subunit 4	O00268	TAF4_HUMAN	1183.12	2911.29	1959.78
libDIA	O00165	O00165	HAX1	HCLS1-associated protein X-1	O00165	HAX1_HUMAN	6272.95	6470.25	5588.25			dirDIA	O00273	O00273	DFFA	DNA fragmentation factor subunit alpha	O00273	DFFA_HUMAN	5522.36	5036.95	6614.25
libDIA	O00170	O00170	AIP	AH receptor-interacting protein	O00170	AIP_HUMAN	33984.8	25608.5	26750.5			dirDIA	O00299	O00299	CLIC1	Chloride intracellular channel protein 1	O00299	CLIC1_HUMAN	135310	114963	101827
libDIA	O00178	O00178	GTPBP1	GTP-binding protein 1	O00178	GTPB1_HUMAN	16368.4	17328.2	14485.3			dirDIA	O00303	O00303	EIF3F	Eukaryotic translation initiation factor 3 subunit F	O00303	EIF3F_HUMAN	68837.8	82930.8	78620.9
libDIA	O00182;Q3B8N2;Q6DKI2	O00182;Q3B8N2;Q6DKI2	LGALS9;LGALS9B;LGALS9C	Galectin-9;Galectin-9B;Galectin-9C	O00182;Q3B8N2;Q6DKI2	LEG9_HUMAN;LEG9B_HUMAN;LEG9C_HUMAN	6785.06	5338.19	3894.39			dirDIA	O00410	O00410	IPO5	Importin-5	O00410	IPO5_HUMAN	77865.5	74953.3	76776.2
libDIA	O00186	O00186	STXBP3	Syntaxin-binding protein 3	O00186	STXB3_HUMAN	5888.82	4870.64	4725.6			dirDIA	O00411	O00411	POLRMT	DNA-directed RNA polymerase, mitochondrial	O00411	RPOM_HUMAN	2987.15	2595.72	2498.4
libDIA	O00193	O00193	SMAP	Small acidic protein	O00193	SMAP_HUMAN	2440.77	Filtered	198.489			dirDIA	O00425	O00425	IGF2BP3	Insulin-like growth factor 2 mRNA-binding protein 3	O00425	IF2B3_HUMAN	29679	33746.7	30796.2
libDIA	O00203	O00203	AP3B1	AP-3 complex subunit beta-1	O00203	AP3B1_HUMAN	23835.7	25172.1	21767.2			dirDIA	O00429	O00429	DNM1L	Dynamin-1-like protein	O00429	DNM1L_HUMAN	12345.7	18859.3	21566.1
libDIA	O00231	O00231	PSMD11	26S proteasome non-ATPase regulatory subunit 11	O00231	PSD11_HUMAN	42515.3	55077.4	60592.4			dirDIA	O00461	O00461	GOLIM4	Golgi integral membrane protein 4	O00461	GOLI4_HUMAN	10116.3	11792.2	8909.03
libDIA	O00232	O00232	PSMD12	26S proteasome non-ATPase regulatory subunit 12	O00232	PSD12_HUMAN	40421.8	40908.7	47211.9			dirDIA	O00483	O00483	NDUFA4	Cytochrome c oxidase subunit NDUFA4	O00483	NDUA4_HUMAN	41217.6	37218.5	67600.5
libDIA	O00233	O00233	PSMD9	26S proteasome non-ATPase regulatory subunit 9	O00233	PSMD9_HUMAN	26590.8	25023.2	25662.4			dirDIA	O00487	O00487	PSMD14	26S proteasome non-ATPase regulatory subunit 14	O00487	PSDE_HUMAN	56864.1	67088.6	60263.8
libDIA	O00244	O00244	ATOX1	Copper transport protein ATOX1	O00244	ATOX1_HUMAN	36761.5	12680.7	18129.7			dirDIA	O00488	O00488	ZNF593	Zinc finger protein 593	O00488	ZN593_HUMAN	10844.2	11544.6	9335.22
libDIA	O00255	O00255	MEN1	Menin	O00255	MEN1_HUMAN	2639.68	3618.04	2741.5			dirDIA	O00505	O00505	KPNA3	Importin subunit alpha-4	O00505	IMA4_HUMAN	1115.7	2453.3	1336.02
libDIA	O00264	O00264	PGRMC1	Membrane-associated progesterone receptor component 1	O00264	PGRC1_HUMAN	20284.7	22614.3	21513.9			dirDIA	O00541	O00541	PES1	Pescadillo homolog	O00541	PESC_HUMAN	42696.3	44467.5	43178.9
libDIA	O00267	O00267	SUPT5H	Transcription elongation factor SPT5	O00267	SPT5H_HUMAN	17152.7	16863.6	18090.2			dirDIA	O00567	O00567	NOP56	Nucleolar protein 56	O00567	NOP56_HUMAN	85257.5	93838.7	84701.9
libDIA	O00268	O00268	TAF4	Transcription initiation factor TFIID subunit 4	O00268	TAF4_HUMAN	Filtered	3746.57	2913.84			dirDIA	O00571	O00571	DDX3X	ATP-dependent RNA helicase DDX3X	O00571	DDX3X_HUMAN	246443	224533	200856
libDIA	O00273	O00273	DFFA	DNA fragmentation factor subunit alpha	O00273	DFFA_HUMAN	7569.2	8281.87	8129.15			dirDIA	O00625	O00625	PIR	Pirin	O00625	PIR_HUMAN	Filtered	601.965	1026.51
libDIA	O00291	O00291	HIP1	Huntingtin-interacting protein 1	O00291	HIP1_HUMAN	Filtered	2362.9	2356.98			dirDIA	O00629	O00629	KPNA4	Importin subunit alpha-3	O00629	IMA3_HUMAN	13373.4	12084.5	10930.8
libDIA	O00299	O00299	CLIC1	Chloride intracellular channel protein 1	O00299	CLIC1_HUMAN	64385.7	40564.8	35565.4			dirDIA	O00743	O00743	PPP6C	Serine/threonine-protein phosphatase 6 catalytic subunit	O00743	PPP6_HUMAN	Filtered	7402.3	7446.89
libDIA	O00303	O00303	EIF3F	Eukaryotic translation initiation factor 3 subunit F	O00303	EIF3F_HUMAN	64502.5	80061.1	72958.8			dirDIA	O00754	O00754	MAN2B1	Lysosomal alpha-mannosidase	O00754	MA2B1_HUMAN	5514.38	7157.09	6341.12
libDIA	O00308	O00308	WWP2	NEDD4-like E3 ubiquitin-protein ligase WWP2	O00308	WWP2_HUMAN	Filtered	4652.94	2600.53			dirDIA	O00762	O00762	UBE2C	Ubiquitin-conjugating enzyme E2 C	O00762	UBE2C_HUMAN	9627.07	7797.38	6409.89
libDIA	O00329	O00329	PIK3CD	Phosphatidylinositol 4,5-bisphosphate 3-kinase catalytic subunit delta isoform	O00329	PK3CD_HUMAN	15261	10328.9	7440.42			dirDIA	O14497	O14497	ARID1A	AT-rich interactive domain-containing protein 1A	O14497	ARI1A_HUMAN	6713.84	5676.08	6042.85
libDIA	O00330	O00330	PDHX	Pyruvate dehydrogenase protein X component, mitochondrial	O00330	ODPX_HUMAN	5068.18	6288.82	8208.98			dirDIA	O14530	O14530	TXNDC9	Thioredoxin domain-containing protein 9	O14530	TXND9_HUMAN	5926.34	7084.83	6352.35
libDIA	O00410	O00410	IPO5	Importin-5	O00410	IPO5_HUMAN	65631.5	64479.7	63629.3			dirDIA	O14548	O14548	COX7A2L	Cytochrome c oxidase subunit 7A-related protein, mitochondrial	O14548	COX7R_HUMAN	9271.73	6618.58	7465.82
libDIA	O00411	O00411	POLRMT	DNA-directed RNA polymerase, mitochondrial	O00411	RPOM_HUMAN	3728.38	4973.92	4852.69			dirDIA	O14579	O14579	COPE	Coatomer subunit epsilon	O14579	COPE_HUMAN	25372.5	29838.2	32103.3
libDIA	O00422	O00422	SAP18	Histone deacetylase complex subunit SAP18	O00422	SAP18_HUMAN	27437.5	11059	21797.7			dirDIA	O14602;P47813	O14602;P47813	EIF1AY;EIF1AX	Eukaryotic translation initiation factor 1A, Y-chromosomal;Eukaryotic translation initiation factor 1A, X-chromosomal	O14602;P47813	IF1AY_HUMAN;IF1AX_HUMAN	30495.4	15480.5	20569.7
libDIA	O00425	O00425	IGF2BP3	Insulin-like growth factor 2 mRNA-binding protein 3	O00425	IF2B3_HUMAN	24874.9	29104.8	26205.9			dirDIA	O14617	O14617	AP3D1	AP-3 complex subunit delta-1	O14617	AP3D1_HUMAN	8737.99	8869.25	8007.48
libDIA	O00429	O00429	DNM1L	Dynamin-1-like protein	O00429	DNM1L_HUMAN	12969	20295.9	22062.9			dirDIA	O14618	O14618	CCS	Copper chaperone for superoxide dismutase	O14618	CCS_HUMAN	19085.6	20350.9	16679.4
libDIA	O00442	O00442	RTCA	RNA 3'-terminal phosphate cyclase	O00442	RTCA_HUMAN	Filtered	5429.38	6133.48			dirDIA	O14656	O14656	TOR1A	Torsin-1A	O14656	TOR1A_HUMAN	4930.03	5508	5860.98
libDIA	O00461	O00461	GOLIM4	Golgi integral membrane protein 4	O00461	GOLI4_HUMAN	16352.7	11597.7	17103.7			dirDIA	O14657	O14657	TOR1B	Torsin-1B	O14657	TOR1B_HUMAN	63427.9	21284.6	27950.9
libDIA	O00471	O00471	EXOC5	Exocyst complex component 5	O00471	EXOC5_HUMAN	Filtered	3883.25	5359.3			dirDIA	O14672	O14672	ADAM10	Disintegrin and metalloproteinase domain-containing protein 10	O14672	ADA10_HUMAN	9891.46	9671.14	9904.22
libDIA	O00483	O00483	NDUFA4	Cytochrome c oxidase subunit NDUFA4	O00483	NDUA4_HUMAN	39065	35405.5	63830.6			dirDIA	O14737	O14737	PDCD5	Programmed cell death protein 5	O14737	PDCD5_HUMAN	47734.4	45264.8	51085
libDIA	O00487	O00487	PSMD14	26S proteasome non-ATPase regulatory subunit 14	O00487	PSDE_HUMAN	41571.8	45746.5	41958.5			dirDIA	O14744	O14744	PRMT5	Protein arginine N-methyltransferase 5	O14744	ANM5_HUMAN	64711.6	78722.7	72995
libDIA	O00488	O00488	ZNF593	Zinc finger protein 593	O00488	ZN593_HUMAN	10618.7	12681.9	10589.1			dirDIA	O14745	O14745	SLC9A3R1	Na(+)/H(+) exchange regulatory cofactor NHE-RF1	O14745	NHRF1_HUMAN	23908.8	13929.1	16271.8
libDIA	O00505	O00505	KPNA3	Importin subunit alpha-4	O00505	IMA4_HUMAN	Filtered	4082.96	5188.3			dirDIA	O14776	O14776	TCERG1	Transcription elongation regulator 1	O14776	TCRG1_HUMAN	31121	38770.9	42468.2
libDIA	O00541	O00541	PES1	Pescadillo homolog	O00541	PESC_HUMAN	42687.1	45080.4	43636.6			dirDIA	O14777	O14777	NDC80	Kinetochore protein NDC80 homolog	O14777	NDC80_HUMAN	1270.57	3214.42	2544.79
libDIA	O00560	O00560	SDCBP	Syntenin-1	O00560	SDCB1_HUMAN	Filtered	1592.13	2266.9			dirDIA	O14818	O14818	PSMA7	Proteasome subunit alpha type-7	O14818	PSA7_HUMAN	198036	156161	145654
libDIA	O00566	O00566	MPHOSPH10	U3 small nucleolar ribonucleoprotein protein MPP10	O00566	MPP10_HUMAN	Filtered	2823.19	1657.85			dirDIA	O14828	O14828	SCAMP3	Secretory carrier-associated membrane protein 3	O14828	SCAM3_HUMAN	22716	23293.7	18162.4
libDIA	O00567	O00567	NOP56	Nucleolar protein 56	O00567	NOP56_HUMAN	91249.4	94449.4	84970.4			dirDIA	O14874	O14874	BCKDK	[3-methyl-2-oxobutanoate dehydrogenase [lipoamide]] kinase, mitochondrial	O14874	BCKD_HUMAN	Filtered	2278.7	1479.08
libDIA	O00571	O00571	DDX3X	ATP-dependent RNA helicase DDX3X	O00571	DDX3X_HUMAN	138921	152504	140145			dirDIA	O14910;Q9HAP6;Q9NUP9	O14910;Q9HAP6;Q9NUP9	LIN7A;LIN7B;LIN7C	Protein lin-7 homolog A;Protein lin-7 homolog B;Protein lin-7 homolog C	O14910;Q9HAP6;Q9NUP9	LIN7A_HUMAN;LIN7B_HUMAN;LIN7C_HUMAN	18921.5	13645.7	16666.9
libDIA	O00625	O00625	PIR	Pirin	O00625	PIR_HUMAN	8049.76	3308.59	4097.67			dirDIA	O14925;Q5SRD1	O14925;Q5SRD1	TIMM23;TIMM23B	Mitochondrial import inner membrane translocase subunit Tim23;Putative mitochondrial import inner membrane translocase subunit Tim23B	O14925;Q5SRD1	TIM23_HUMAN;TI23B_HUMAN	4753.56	3357.43	5077.18
libDIA	O00629	O00629	KPNA4	Importin subunit alpha-3	O00629	IMA3_HUMAN	13796.8	12561.3	11261.7			dirDIA	O14929	O14929	HAT1	Histone acetyltransferase type B catalytic subunit	O14929	HAT1_HUMAN	16497.3	9424.53	9327.57
libDIA	O00743	O00743	PPP6C	Serine/threonine-protein phosphatase 6 catalytic subunit	O00743	PPP6_HUMAN	Filtered	5567.18	5549.24			dirDIA	O14933	O14933	UBE2L6	Ubiquitin/ISG15-conjugating enzyme E2 L6	O14933	UB2L6_HUMAN	15715.8	13539.6	14171.9
libDIA	O00754	O00754	MAN2B1	Lysosomal alpha-mannosidase	O00754	MA2B1_HUMAN	7061.06	9687.32	9929.32			dirDIA	O14949	O14949	UQCRQ	Cytochrome b-c1 complex subunit 8	O14949	QCR8_HUMAN	3139.43	11037.5	12748.9
libDIA	O00764	O00764	PDXK	Pyridoxal kinase	O00764	PDXK_HUMAN	5453.35	6361.75	4541.5			dirDIA	O14950;P19105	O14950;P19105	MYL12B;MYL12A	Myosin regulatory light chain 12B;Myosin regulatory light chain 12A	O14950;P19105	ML12B_HUMAN;ML12A_HUMAN	149766	152023	146591
libDIA	O00767	O00767	SCD	Acyl-CoA desaturase	O00767	ACOD_HUMAN	Filtered	6640.02	4541.11			dirDIA	O14964	O14964	HGS	Hepatocyte growth factor-regulated tyrosine kinase substrate	O14964	HGS_HUMAN	8398.42	12272.9	9359.52
libDIA	O14492	O14492	SH2B2	SH2B adapter protein 2	O14492	SH2B2_HUMAN	Filtered	24147.2	28148.5			dirDIA	O14974	O14974	PPP1R12A	Protein phosphatase 1 regulatory subunit 12A	O14974	MYPT1_HUMAN	18709	11880.1	14356.3
libDIA	O14497	O14497	ARID1A	AT-rich interactive domain-containing protein 1A	O14497	ARI1A_HUMAN	6414.33	4263.66	4252.7			dirDIA	O14979	O14979	HNRNPDL	Heterogeneous nuclear ribonucleoprotein D-like	O14979	HNRDL_HUMAN	121919	114659	100736
libDIA	O14530	O14530	TXNDC9	Thioredoxin domain-containing protein 9	O14530	TXND9_HUMAN	1680.2	2537.03	2273.65			dirDIA	O14980	O14980	XPO1	Exportin-1	O14980	XPO1_HUMAN	10213	17283	19663.8
libDIA	O14545	O14545	TRAFD1	TRAF-type zinc finger domain-containing protein 1	O14545	TRAD1_HUMAN	3226.52	Filtered	Filtered			dirDIA	O15027	O15027	SEC16A	Protein transport protein Sec16A	O15027	SC16A_HUMAN	18879.4	17739.1	15588.4
libDIA	O14548	O14548	COX7A2L	Cytochrome c oxidase subunit 7A-related protein, mitochondrial	O14548	COX7R_HUMAN	9511.52	5780.24	6140.11			dirDIA	O15042	O15042	U2SURP	U2 snRNP-associated SURP motif-containing protein	O15042	SR140_HUMAN	18462.5	25217.5	24851.3
libDIA	O14561	O14561	NDUFAB1	Acyl carrier protein, mitochondrial	O14561	ACPM_HUMAN	9072.62	4762.08	5574.48			dirDIA	O15067	O15067	PFAS	Phosphoribosylformylglycinamidine synthase	O15067	PUR4_HUMAN	26431.8	35829.5	34447.1
libDIA	O14562	O14562	UBFD1	Ubiquitin domain-containing protein UBFD1	O14562	UBFD1_HUMAN	Filtered	11848.4	9846.82			dirDIA	O15127	O15127	SCAMP2	Secretory carrier-associated membrane protein 2	O15127	SCAM2_HUMAN	15038	16587.1	21063.1
libDIA	O14578	O14578	CIT	Citron Rho-interacting kinase	O14578	CTRO_HUMAN	5907.01	2393.15	2497.78			dirDIA	O15143	O15143	ARPC1B	Actin-related protein 2/3 complex subunit 1B	O15143	ARC1B_HUMAN	54996.6	48915.1	49092.8
libDIA	O14579	O14579	COPE	Coatomer subunit epsilon	O14579	COPE_HUMAN	27774.3	31616.7	32891.1			dirDIA	O15144	O15144	ARPC2	Actin-related protein 2/3 complex subunit 2	O15144	ARPC2_HUMAN	117064	114048	95827
libDIA	O14602;P47813	O14602;P47813	EIF1AY;EIF1AX	Eukaryotic translation initiation factor 1A, Y-chromosomal;Eukaryotic translation initiation factor 1A, X-chromosomal	O14602;P47813	IF1AY_HUMAN;IF1AX_HUMAN	31725.7	14463.2	20724.6			dirDIA	O15145	O15145	ARPC3	Actin-related protein 2/3 complex subunit 3	O15145	ARPC3_HUMAN	72671.5	95268.3	93645
libDIA	O14617	O14617	AP3D1	AP-3 complex subunit delta-1	O14617	AP3D1_HUMAN	14971.2	8921.05	5636			dirDIA	O15155	O15155	BET1	BET1 homolog	O15155	BET1_HUMAN	16662	10807.6	19589.7
libDIA	O14618	O14618	CCS	Copper chaperone for superoxide dismutase	O14618	CCS_HUMAN	16909.1	16936.6	24241.1			dirDIA	O15160	O15160	POLR1C	DNA-directed RNA polymerases I and III subunit RPAC1	O15160	RPAC1_HUMAN	11651.8	11271.3	12939.2
libDIA	O14646	O14646	CHD1	Chromodomain-helicase-DNA-binding protein 1	O14646	CHD1_HUMAN	7961.66	8517.01	7750.35			dirDIA	O15173	O15173	PGRMC2	Membrane-associated progesterone receptor component 2	O15173	PGRC2_HUMAN	19014.1	24702.7	22638.1
libDIA	O14656	O14656	TOR1A	Torsin-1A	O14656	TOR1A_HUMAN	10851	7908.34	12103.8			dirDIA	O15198;P84022;Q15796	O15198;P84022;Q15796	SMAD9;SMAD3;SMAD2	Mothers against decapentaplegic homolog 9;Mothers against decapentaplegic homolog 3;Mothers against decapentaplegic homolog 2	O15198;P84022;Q15796	SMAD9_HUMAN;SMAD3_HUMAN;SMAD2_HUMAN	4205.92	17011.8	15964.5
libDIA	O14657	O14657	TOR1B	Torsin-1B	O14657	TOR1B_HUMAN	18411.7	5901.89	1962.99			dirDIA	O15212	O15212	PFDN6	Prefoldin subunit 6	O15212	PFD6_HUMAN	22416.4	17518.6	21911.7
libDIA	O14672	O14672	ADAM10	Disintegrin and metalloproteinase domain-containing protein 10	O14672	ADA10_HUMAN	24311.7	10886.5	8068.82			dirDIA	O15213	O15213	WDR46	WD repeat-containing protein 46	O15213	WDR46_HUMAN	6023.97	10056.5	9470.11
libDIA	O14732	O14732	IMPA2	Inositol monophosphatase 2	O14732	IMPA2_HUMAN	Filtered	2754.99	2018.01			dirDIA	O15226	O15226	NKRF	NF-kappa-B-repressing factor	O15226	NKRF_HUMAN	26084	31702.7	29085.4
libDIA	O14734	O14734	ACOT8	Acyl-coenzyme A thioesterase 8	O14734	ACOT8_HUMAN	Filtered	8203.25	5713.09			dirDIA	O15260	O15260	SURF4	Surfeit locus protein 4	O15260	SURF4_HUMAN	16761.7	7207.55	7061.96
libDIA	O14737	O14737	PDCD5	Programmed cell death protein 5	O14737	PDCD5_HUMAN	49387.7	47968.7	53048.6			dirDIA	O15269	O15269	SPTLC1	Serine palmitoyltransferase 1	O15269	SPTC1_HUMAN	8806.33	11463.1	11916.8
libDIA	O14744	O14744	PRMT5	Protein arginine N-methyltransferase 5	O14744	ANM5_HUMAN	60412.7	66208.9	62732.5			dirDIA	O15294	O15294	OGT	UDP-N-acetylglucosamine--peptide N-acetylglucosaminyltransferase 110 kDa subunit	O15294	OGT1_HUMAN	6036.5	12759.9	13010.6
libDIA	O14745	O14745	SLC9A3R1	Na(+)/H(+) exchange regulatory cofactor NHE-RF1	O14745	NHRF1_HUMAN	24576.1	14485.5	16632.5			dirDIA	O15305	O15305	PMM2	Phosphomannomutase 2	O15305	PMM2_HUMAN	18860.6	15952.8	17437
libDIA	O14757	O14757	CHEK1	Serine/threonine-protein kinase Chk1	O14757	CHK1_HUMAN	4049.03	5102.78	5819.13			dirDIA	O15347	O15347	HMGB3	High mobility group protein B3	O15347	HMGB3_HUMAN	14689.1	18728	18234.4
libDIA	O14773	O14773	TPP1	Tripeptidyl-peptidase 1	O14773	TPP1_HUMAN	Filtered	4081.65	4237.44			dirDIA	O15355	O15355	PPM1G	Protein phosphatase 1G	O15355	PPM1G_HUMAN	34154.1	35223.5	34031.9
libDIA	O14776	O14776	TCERG1	Transcription elongation regulator 1	O14776	TCRG1_HUMAN	34137.6	40573.2	45039.6			dirDIA	O15357	O15357	INPPL1	Phosphatidylinositol 3,4,5-trisphosphate 5-phosphatase 2	O15357	SHIP2_HUMAN	8905.98	7845.18	6115.46
libDIA	O14777	O14777	NDC80	Kinetochore protein NDC80 homolog	O14777	NDC80_HUMAN	4794.81	4004.98	4807.11			dirDIA	O15371	O15371	EIF3D	Eukaryotic translation initiation factor 3 subunit D	O15371	EIF3D_HUMAN	75961	83123.6	76024.7
libDIA	O14802	O14802	POLR3A	DNA-directed RNA polymerase III subunit RPC1	O14802	RPC1_HUMAN	8943.37	7907.61	8005.7			dirDIA	O15372	O15372	EIF3H	Eukaryotic translation initiation factor 3 subunit H	O15372	EIF3H_HUMAN	59769.8	57139.8	49358.7
libDIA	O14818	O14818	PSMA7	Proteasome subunit alpha type-7	O14818	PSA7_HUMAN	182082	147280	139042			dirDIA	O15381	O15381	NVL	Nuclear valosin-containing protein-like	O15381	NVL_HUMAN	949.882	2925.49	3376.68
libDIA	O14828	O14828	SCAMP3	Secretory carrier-associated membrane protein 3	O14828	SCAM3_HUMAN	10347.2	15367.1	9161.94			dirDIA	O15397	O15397	IPO8	Importin-8	O15397	IPO8_HUMAN	5587.82	4333.25	4224.6
libDIA	O14874	O14874	BCKDK	[3-methyl-2-oxobutanoate dehydrogenase [lipoamide]] kinase, mitochondrial	O14874	BCKD_HUMAN	4581.48	4953.29	4657.49			dirDIA	O15400	O15400	STX7	Syntaxin-7	O15400	STX7_HUMAN	19759.2	21891.5	16237.5
libDIA	O14893	O14893	GEMIN2	Gem-associated protein 2	O14893	GEMI2_HUMAN	5765.84	2943.62	2564.77			dirDIA	O15446	O15446	CD3EAP	DNA-directed RNA polymerase I subunit RPA34	O15446	RPA34_HUMAN	18109.1	17749.7	15672
libDIA	O14920;O15111	O14920;O15111	IKBKB;CHUK	Inhibitor of nuclear factor kappa-B kinase subunit beta;Inhibitor of nuclear factor kappa-B kinase subunit alpha	O14920;O15111	IKKB_HUMAN;IKKA_HUMAN	15541.7	Filtered	2089.54			dirDIA	O15498	O15498	YKT6	Synaptobrevin homolog YKT6	O15498	YKT6_HUMAN	5764.13	11340.3	12285.6
libDIA	O14925;Q5SRD1	O14925;Q5SRD1	TIMM23;TIMM23B	Mitochondrial import inner membrane translocase subunit Tim23;Putative mitochondrial import inner membrane translocase subunit Tim23B	O14925;Q5SRD1	TIM23_HUMAN;TI23B_HUMAN	5188.83	4318.66	3213.16			dirDIA	O15511	O15511	ARPC5	Actin-related protein 2/3 complex subunit 5	O15511	ARPC5_HUMAN	110707	103863	65558
libDIA	O14929	O14929	HAT1	Histone acetyltransferase type B catalytic subunit	O14929	HAT1_HUMAN	14742.8	10833.3	9942.92			dirDIA	O15533	O15533	TAPBP	Tapasin	O15533	TPSN_HUMAN	107571	88401.2	90197.3
libDIA	O14933	O14933	UBE2L6	Ubiquitin/ISG15-conjugating enzyme E2 L6	O14933	UB2L6_HUMAN	18768.4	15026.8	15445			dirDIA	O43143	O43143	DHX15	Pre-mRNA-splicing factor ATP-dependent RNA helicase DHX15	O43143	DHX15_HUMAN	116453	89607.7	91617.7
libDIA	O14949	O14949	UQCRQ	Cytochrome b-c1 complex subunit 8	O14949	QCR8_HUMAN	16794.4	11894.6	13042			dirDIA	O43156	O43156	TTI1	TELO2-interacting protein 1 homolog	O43156	TTI1_HUMAN	6135.42	5573.41	5595.78
libDIA	O14950;P19105	O14950;P19105	MYL12B;MYL12A	Myosin regulatory light chain 12B;Myosin regulatory light chain 12A	O14950;P19105	ML12B_HUMAN;ML12A_HUMAN	90778.7	90059.9	90693.6			dirDIA	O43169	O43169	CYB5B	Cytochrome b5 type B	O43169	CYB5B_HUMAN	68571.6	47003.8	51955.2
libDIA	O14965	O14965	AURKA	Aurora kinase A	O14965	AURKA_HUMAN	16797.6	4228.3	5866.61			dirDIA	O43172	O43172	PRPF4	U4/U6 small nuclear ribonucleoprotein Prp4	O43172	PRP4_HUMAN	9680.69	10332.3	9447.62
libDIA	O14966	O14966	RAB29	Ras-related protein Rab-7L1	O14966	RAB7L_HUMAN	5084.69	8563.2	6695.52			dirDIA	O43181	O43181	NDUFS4	NADH dehydrogenase [ubiquinone] iron-sulfur protein 4, mitochondrial	O43181	NDUS4_HUMAN	12434.4	15085.1	12236.3
libDIA	O14974	O14974	PPP1R12A	Protein phosphatase 1 regulatory subunit 12A	O14974	MYPT1_HUMAN	3160.72	4102.95	4382.68			dirDIA	O43237	O43237	DYNC1LI2	Cytoplasmic dynein 1 light intermediate chain 2	O43237	DC1L2_HUMAN	Filtered	2126.61	3179.47
libDIA	O14976	O14976	GAK	Cyclin-G-associated kinase	O14976	GAK_HUMAN	5885.28	5956.32	6902.93			dirDIA	O43242	O43242	PSMD3	26S proteasome non-ATPase regulatory subunit 3	O43242	PSMD3_HUMAN	87639.3	69597.6	78969.2
libDIA	O14979	O14979	HNRNPDL	Heterogeneous nuclear ribonucleoprotein D-like	O14979	HNRDL_HUMAN	124793	119586	106603			dirDIA	O43252	O43252	PAPSS1	Bifunctional 3'-phosphoadenosine 5'-phosphosulfate synthase 1	O43252	PAPS1_HUMAN	1826.25	5326.79	4792.51
libDIA	O14980	O14980	XPO1	Exportin-1	O14980	XPO1_HUMAN	8700.52	11039.9	12639.8			dirDIA	O43264	O43264	ZW10	Centromere/kinetochore protein zw10 homolog	O43264	ZW10_HUMAN	3451.05	5345.28	5286.24
libDIA	O14981	O14981	BTAF1	TATA-binding protein-associated factor 172	O14981	BTAF1_HUMAN	10479.1	3851.57	6034.69			dirDIA	O43290	O43290	SART1	U4/U6.U5 tri-snRNP-associated protein 1	O43290	SNUT1_HUMAN	19075.7	18312.7	16178.7
libDIA	O15027	O15027	SEC16A	Protein transport protein Sec16A	O15027	SC16A_HUMAN	18789.5	19256.8	17176.5			dirDIA	O43292	O43292	GPAA1	Glycosylphosphatidylinositol anchor attachment 1 protein	O43292	GPAA1_HUMAN	5704.25	9098.17	8328.67
libDIA	O15042	O15042	U2SURP	U2 snRNP-associated SURP motif-containing protein	O15042	SR140_HUMAN	26521.3	30247.1	33543.5			dirDIA	O43324	O43324	EEF1E1	Eukaryotic translation elongation factor 1 epsilon-1	O43324	MCA3_HUMAN	51838.7	28382.8	36307.1
libDIA	O15047	O15047	SETD1A	Histone-lysine N-methyltransferase SETD1A	O15047	SET1A_HUMAN	Filtered	4081.37	4318.57			dirDIA	O43390	O43390	HNRNPR	Heterogeneous nuclear ribonucleoprotein R	O43390	HNRPR_HUMAN	139546	125105	116890
libDIA	O15067	O15067	PFAS	Phosphoribosylformylglycinamidine synthase	O15067	PUR4_HUMAN	29456.4	37440.6	35725.5			dirDIA	O43395	O43395	PRPF3	U4/U6 small nuclear ribonucleoprotein Prp3	O43395	PRPF3_HUMAN	25091.9	25059.5	26232.8
libDIA	O15091	O15091	KIAA0391	Mitochondrial ribonuclease P protein 3	O15091	MRRP3_HUMAN	Filtered	458.571	1373.9			dirDIA	O43396	O43396	TXNL1	Thioredoxin-like protein 1	O43396	TXNL1_HUMAN	53502.2	56908.4	52306.7
libDIA	O15126	O15126	SCAMP1	Secretory carrier-associated membrane protein 1	O15126	SCAM1_HUMAN	Filtered	1528.96	14870.2			dirDIA	O43399	O43399	TPD52L2	Tumor protein D54	O43399	TPD54_HUMAN	43189.6	36614.6	32664.6
libDIA	O15127	O15127	SCAMP2	Secretory carrier-associated membrane protein 2	O15127	SCAM2_HUMAN	14583.9	14830.8	19164.4			dirDIA	O43402	O43402	EMC8	ER membrane protein complex subunit 8	O43402	EMC8_HUMAN	15247.9	19123.3	18770
libDIA	O15143	O15143	ARPC1B	Actin-related protein 2/3 complex subunit 1B	O15143	ARC1B_HUMAN	52132.5	46386.4	44479.1			dirDIA	O43447	O43447	PPIH	Peptidyl-prolyl cis-trans isomerase H	O43447	PPIH_HUMAN	23130.4	22178.8	21334
libDIA	O15144	O15144	ARPC2	Actin-related protein 2/3 complex subunit 2	O15144	ARPC2_HUMAN	82422.2	85607.7	75510.2			dirDIA	O43464	O43464	HTRA2	Serine protease HTRA2, mitochondrial	O43464	HTRA2_HUMAN	13898.2	17103.7	14202.3
libDIA	O15145	O15145	ARPC3	Actin-related protein 2/3 complex subunit 3	O15145	ARPC3_HUMAN	76443	92402.1	97845.9			dirDIA	O43491	O43491	EPB41L2	Band 4.1-like protein 2	O43491	E41L2_HUMAN	2464.47	4707.56	4961.48
libDIA	O15155	O15155	BET1	BET1 homolog	O15155	BET1_HUMAN	10586.1	2956.55	6297.12			dirDIA	O43566	O43566	RGS14	Regulator of G-protein signaling 14	O43566	RGS14_HUMAN	6330.95	9274.68	8415.36
libDIA	O15160	O15160	POLR1C	DNA-directed RNA polymerases I and III subunit RPAC1	O15160	RPAC1_HUMAN	20692.4	23533.8	25435			dirDIA	O43583	O43583	DENR	Density-regulated protein	O43583	DENR_HUMAN	55855.8	36054.8	46685.6
libDIA	O15173	O15173	PGRMC2	Membrane-associated progesterone receptor component 2	O15173	PGRC2_HUMAN	22236.6	29227.5	27631			dirDIA	O43598	O43598	DNPH1	2'-deoxynucleoside 5'-phosphate N-hydrolase 1	O43598	DNPH1_HUMAN	8260.96	6262.93	8310.51
libDIA	O15198;P84022;Q15796	O15198;P84022;Q15796	SMAD9;SMAD3;SMAD2	Mothers against decapentaplegic homolog 9;Mothers against decapentaplegic homolog 3;Mothers against decapentaplegic homolog 2	O15198;P84022;Q15796	SMAD9_HUMAN;SMAD3_HUMAN;SMAD2_HUMAN	7125.15	17913.6	18317.1			dirDIA	O43615	O43615	TIMM44	Mitochondrial import inner membrane translocase subunit TIM44	O43615	TIM44_HUMAN	26219.1	30176	25534.2
libDIA	O15212	O15212	PFDN6	Prefoldin subunit 6	O15212	PFD6_HUMAN	10330.2	9302.09	10349.9			dirDIA	O43617	O43617	TRAPPC3	Trafficking protein particle complex subunit 3	O43617	TPPC3_HUMAN	34214.4	29935.7	26996.8
libDIA	O15213	O15213	WDR46	WD repeat-containing protein 46	O15213	WDR46_HUMAN	9673.7	12359.3	10962			dirDIA	O43633	O43633	CHMP2A	Charged multivesicular body protein 2a	O43633	CHM2A_HUMAN	10203.2	12377	12238.7
libDIA	O15226	O15226	NKRF	NF-kappa-B-repressing factor	O15226	NKRF_HUMAN	16681.7	18755.3	19128			dirDIA	O43660	O43660	PLRG1	Pleiotropic regulator 1	O43660	PLRG1_HUMAN	4584.65	5650	5560.58
libDIA	O15228	O15228	GNPAT	Dihydroxyacetone phosphate acyltransferase	O15228	GNPAT_HUMAN	2390.85	4374.06	2350.63			dirDIA	O43665	O43665	RGS10	Regulator of G-protein signaling 10	O43665	RGS10_HUMAN	1434.31	4571.13	3719.54
libDIA	O15254	O15254	ACOX3	Peroxisomal acyl-coenzyme A oxidase 3	O15254	ACOX3_HUMAN	63505.2	26802.9	23542.1			dirDIA	O43670	O43670	ZNF207	BUB3-interacting and GLEBS motif-containing protein ZNF207	O43670	ZN207_HUMAN	71274.7	59632.5	52249
libDIA	O15258	O15258	RER1	Protein RER1	O15258	RER1_HUMAN	11619.3	8999.59	9548.66			dirDIA	O43674	O43674	NDUFB5	NADH dehydrogenase [ubiquinone] 1 beta subcomplex subunit 5, mitochondrial	O43674	NDUB5_HUMAN	23481.4	22141.4	10546.6
libDIA	O15260	O15260	SURF4	Surfeit locus protein 4	O15260	SURF4_HUMAN	22351.8	10047.1	8347.27			dirDIA	O43676	O43676	NDUFB3	NADH dehydrogenase [ubiquinone] 1 beta subcomplex subunit 3	O43676	NDUB3_HUMAN	15311.3	14501.4	11738
libDIA	O15269	O15269	SPTLC1	Serine palmitoyltransferase 1	O15269	SPTC1_HUMAN	6518.9	6575.92	7271.89			dirDIA	O43678	O43678	NDUFA2	NADH dehydrogenase [ubiquinone] 1 alpha subcomplex subunit 2	O43678	NDUA2_HUMAN	16001.9	21100	19610.8
libDIA	O15294	O15294	OGT	UDP-N-acetylglucosamine--peptide N-acetylglucosaminyltransferase 110 kDa subunit	O15294	OGT1_HUMAN	8548.91	16685.1	15789.5			dirDIA	O43681	O43681	ASNA1	ATPase ASNA1	O43681	ASNA_HUMAN	18095	25309.3	24556.6
libDIA	O15305	O15305	PMM2	Phosphomannomutase 2	O15305	PMM2_HUMAN	21283.8	17290.7	18644.9			dirDIA	O43684	O43684	BUB3	Mitotic checkpoint protein BUB3	O43684	BUB3_HUMAN	93722	88451.9	91085.2
libDIA	O15320	O15320	CTAGE5	cTAGE family member 5	O15320	CTGE5_HUMAN	3806.87	1803.12	2627.35			dirDIA	O43707	O43707	ACTN4	Alpha-actinin-4	O43707	ACTN4_HUMAN	62276.1	63933.8	52049.3
libDIA	O15321	O15321	TM9SF1	Transmembrane 9 superfamily member 1	O15321	TM9S1_HUMAN	30152.5	18937.2	17079.3			dirDIA	O43719	O43719	HTATSF1	HIV Tat-specific factor 1	O43719	HTSF1_HUMAN	28063.5	20992.2	29959.7
libDIA	O15347	O15347	HMGB3	High mobility group protein B3	O15347	HMGB3_HUMAN	15429.8	21650.9	20951.1			dirDIA	O43747	O43747	AP1G1	AP-1 complex subunit gamma-1	O43747	AP1G1_HUMAN	Filtered	8249.17	8434.55
libDIA	O15355	O15355	PPM1G	Protein phosphatase 1G	O15355	PPM1G_HUMAN	39404.2	35617.7	34821.8			dirDIA	O43760	O43760	SYNGR2	Synaptogyrin-2	O43760	SNG2_HUMAN	141197	105174	127161
libDIA	O15357	O15357	INPPL1	Phosphatidylinositol 3,4,5-trisphosphate 5-phosphatase 2	O15357	SHIP2_HUMAN	9400.29	5181.39	6582.6			dirDIA	O43765	O43765	SGTA	Small glutamine-rich tetratricopeptide repeat-containing protein alpha	O43765	SGTA_HUMAN	22853.3	21541.3	20337
libDIA	O15371	O15371	EIF3D	Eukaryotic translation initiation factor 3 subunit D	O15371	EIF3D_HUMAN	80483.7	90412.6	83146.1			dirDIA	O43768	O43768	ENSA	Alpha-endosulfine	O43768	ENSA_HUMAN	32749	30935	31262.3
libDIA	O15372	O15372	EIF3H	Eukaryotic translation initiation factor 3 subunit H	O15372	EIF3H_HUMAN	50877.1	53188	45496			dirDIA	O43776	O43776	NARS	Asparagine--tRNA ligase, cytoplasmic	O43776	SYNC_HUMAN	27818.9	36952.9	41164
libDIA	O15381	O15381	NVL	Nuclear valosin-containing protein-like	O15381	NVL_HUMAN	Filtered	2500.19	3103.91			dirDIA	O43805	O43805	SSNA1	Sjoegren syndrome nuclear autoantigen 1	O43805	SSNA1_HUMAN	7793.48	6997.62	7457.31
libDIA	O15397	O15397	IPO8	Importin-8	O15397	IPO8_HUMAN	2280.92	4554.58	5505.42			dirDIA	O43809	O43809	NUDT21	Cleavage and polyadenylation specificity factor subunit 5	O43809	CPSF5_HUMAN	42691.8	48127.2	43542.3
libDIA	O15400	O15400	STX7	Syntaxin-7	O15400	STX7_HUMAN	18945.4	6882.99	8282.41			dirDIA	O43813	O43813	LANCL1	LanC-like protein 1	O43813	LANC1_HUMAN	7034.71	6098.28	5046.28
libDIA	O15446	O15446	CD3EAP	DNA-directed RNA polymerase I subunit RPA34	O15446	RPA34_HUMAN	13849.3	23130.6	19642.8			dirDIA	O43818	O43818	RRP9	U3 small nucleolar RNA-interacting protein 2	O43818	U3IP2_HUMAN	35592	34458.6	36140.6
libDIA	O15498	O15498	YKT6	Synaptobrevin homolog YKT6	O15498	YKT6_HUMAN	6878.67	9863.38	11084.2			dirDIA	O43823	O43823	AKAP8	A-kinase anchor protein 8	O43823	AKAP8_HUMAN	1933.1	568.366	1106.3
libDIA	O15511	O15511	ARPC5	Actin-related protein 2/3 complex subunit 5	O15511	ARPC5_HUMAN	110183	104333	65404.7			dirDIA	O43837	O43837	IDH3B	Isocitrate dehydrogenase [NAD] subunit beta, mitochondrial	O43837	IDH3B_HUMAN	32556.7	32389.5	31974.9
libDIA	O15514	O15514	POLR2D	DNA-directed RNA polymerase II subunit RPB4	O15514	RPB4_HUMAN	17039.7	16228.9	14329.8			dirDIA	O43847	O43847	NRD1	Nardilysin	O43847	NRDC_HUMAN	14027.8	11697.8	12734.1
libDIA	O15523	O15523	DDX3Y	ATP-dependent RNA helicase DDX3Y	O15523	DDX3Y_HUMAN	1739.43	1119.29	1626.99			dirDIA	O43852	O43852	CALU	Calumenin	O43852	CALU_HUMAN	55550.3	34002.1	33118.7
libDIA	O15530;Q6A1A2	O15530;Q6A1A2	PDPK1;PDPK2P	3-phosphoinositide-dependent protein kinase 1;Putative 3-phosphoinositide-dependent protein kinase 2	O15530;Q6A1A2	PDPK1_HUMAN;PDPK2_HUMAN	Filtered	4003.86	4016.9			dirDIA	O43865;Q96HN2	O43865;Q96HN2	AHCYL1;AHCYL2	Adenosylhomocysteinase 2;Adenosylhomocysteinase 3	O43865;Q96HN2	SAHH2_HUMAN;SAHH3_HUMAN	7412.95	8985.78	8721.53
libDIA	O15533	O15533	TAPBP	Tapasin	O15533	TPSN_HUMAN	94687.2	79786	82818.6			dirDIA	O43924	O43924	PDE6D	Retinal rod rhodopsin-sensitive cGMP 3',5'-cyclic phosphodiesterase subunit delta	O43924	PDE6D_HUMAN	Filtered	5340.69	3307.1
libDIA	O15541	O15541	RNF113A	RING finger protein 113A	O15541	R113A_HUMAN	13945.4	9772.61	10446			dirDIA	O60216	O60216	RAD21	Double-strand-break repair protein rad21 homolog	O60216	RAD21_HUMAN	26167.1	30696	25970.9
libDIA	O15554	O15554	KCNN4	Intermediate conductance calcium-activated potassium channel protein 4	O15554	KCNN4_HUMAN	Filtered	1419.07	1734.44			dirDIA	O60220	O60220	TIMM8A	Mitochondrial import inner membrane translocase subunit Tim8 A	O60220	TIM8A_HUMAN	24425.7	30463.1	27487.8
libDIA	O43143	O43143	DHX15	Pre-mRNA-splicing factor ATP-dependent RNA helicase DHX15	O43143	DHX15_HUMAN	102799	95422.6	95382			dirDIA	O60231	O60231	DHX16	Putative pre-mRNA-splicing factor ATP-dependent RNA helicase DHX16	O60231	DHX16_HUMAN	3399.86	4224.8	5680.97
libDIA	O43148	O43148	RNMT	mRNA cap guanine-N7 methyltransferase	O43148	MCES_HUMAN	7236.93	7605.56	8707.1			dirDIA	O60234	O60234	GMFG	Glia maturation factor gamma	O60234	GMFG_HUMAN	2918.93	2347.15	3590.3
libDIA	O43156	O43156	TTI1	TELO2-interacting protein 1 homolog	O43156	TTI1_HUMAN	6504.62	3926.35	3947.35			dirDIA	O60256	O60256	PRPSAP2	Phosphoribosyl pyrophosphate synthase-associated protein 2	O60256	KPRB_HUMAN	6301.9	4985.55	5294.55
libDIA	O43159	O43159	RRP8	Ribosomal RNA-processing protein 8	O43159	RRP8_HUMAN	4029.3	8363.79	3089.3			dirDIA	O60264	O60264	SMARCA5	SWI/SNF-related matrix-associated actin-dependent regulator of chromatin subfamily A member 5	O60264	SMCA5_HUMAN	62964	46969.7	52302.1
libDIA	O43169	O43169	CYB5B	Cytochrome b5 type B	O43169	CYB5B_HUMAN	47023.4	32752	53262			dirDIA	O60287	O60287	URB1	Nucleolar pre-ribosomal-associated protein 1	O60287	NPA1P_HUMAN	7283.37	6827.23	6205.61
libDIA	O43172	O43172	PRPF4	U4/U6 small nuclear ribonucleoprotein Prp4	O43172	PRP4_HUMAN	11527.3	12091.2	11274.4			dirDIA	O60313	O60313	OPA1	Dynamin-like 120 kDa protein, mitochondrial	O60313	OPA1_HUMAN	11783.5	14239.9	13102.1
libDIA	O43175	O43175	PHGDH	D-3-phosphoglycerate dehydrogenase	O43175	SERA_HUMAN	Filtered	3477.17	3444.03			dirDIA	O60341	O60341	KDM1A	Lysine-specific histone demethylase 1A	O60341	KDM1A_HUMAN	11155.1	25982.6	24926.9
libDIA	O43181	O43181	NDUFS4	NADH dehydrogenase [ubiquinone] iron-sulfur protein 4, mitochondrial	O43181	NDUS4_HUMAN	15603.8	15907	13380.4			dirDIA	O60361	O60361	NME2P1	Putative nucleoside diphosphate kinase	O60361	NDK8_HUMAN	42410.3	24653.5	16305
libDIA	O43196	O43196	MSH5	MutS protein homolog 5	O43196	MSH5_HUMAN	16710.1	7534.74	7074.74			dirDIA	O60443	O60443	DFNA5	Non-syndromic hearing impairment protein 5	O60443	DFNA5_HUMAN	20816.2	21595.3	28369.8
libDIA	O43237	O43237	DYNC1LI2	Cytoplasmic dynein 1 light intermediate chain 2	O43237	DC1L2_HUMAN	Filtered	1832.35	2220.43			dirDIA	O60449	O60449	LY75	Lymphocyte antigen 75	O60449	LY75_HUMAN	2198.95	3315.47	3467.95
libDIA	O43242	O43242	PSMD3	26S proteasome non-ATPase regulatory subunit 3	O43242	PSMD3_HUMAN	61237.1	52604.6	59931.6			dirDIA	O60488	O60488	ACSL4	Long-chain-fatty-acid--CoA ligase 4	O60488	ACSL4_HUMAN	4624.21	7101.04	7362.18
libDIA	O43252	O43252	PAPSS1	Bifunctional 3'-phosphoadenosine 5'-phosphosulfate synthase 1	O43252	PAPS1_HUMAN	Filtered	4970.52	3898.9			dirDIA	O60499	O60499	STX10	Syntaxin-10	O60499	STX10_HUMAN	1537.39	3669.36	3387.98
libDIA	O43264	O43264	ZW10	Centromere/kinetochore protein zw10 homolog	O43264	ZW10_HUMAN	Filtered	5070.75	5160.27			dirDIA	O60506	O60506	SYNCRIP	Heterogeneous nuclear ribonucleoprotein Q	O60506	HNRPQ_HUMAN	255454	211295	206810
libDIA	O43290	O43290	SART1	U4/U6.U5 tri-snRNP-associated protein 1	O43290	SNUT1_HUMAN	26773.7	23749.6	22748.1			dirDIA	O60524	O60524	NEMF	Nuclear export mediator factor NEMF	O60524	NEMF_HUMAN	8733.44	10426.9	9898.33
libDIA	O43292	O43292	GPAA1	Glycosylphosphatidylinositol anchor attachment 1 protein	O43292	GPAA1_HUMAN	8316.95	9189.9	7327.09			dirDIA	O60547	O60547	GMDS	GDP-mannose 4,6 dehydratase	O60547	GMDS_HUMAN	1491.9	3243.69	3468.95
libDIA	O43324	O43324	EEF1E1	Eukaryotic translation elongation factor 1 epsilon-1	O43324	MCA3_HUMAN	48786.8	10160.6	14151.5			dirDIA	O60610	O60610	DIAPH1	Protein diaphanous homolog 1	O60610	DIAP1_HUMAN	14419.4	21762.7	23111.5
libDIA	O43390	O43390	HNRNPR	Heterogeneous nuclear ribonucleoprotein R	O43390	HNRPR_HUMAN	61780.9	73956.2	71173.7			dirDIA	O60664	O60664	PLIN3	Perilipin-3	O60664	PLIN3_HUMAN	31577.8	27702.9	24879
libDIA	O43395	O43395	PRPF3	U4/U6 small nuclear ribonucleoprotein Prp3	O43395	PRPF3_HUMAN	35783	29104	31549.3			dirDIA	O60678	O60678	PRMT3	Protein arginine N-methyltransferase 3	O60678	ANM3_HUMAN	30176.3	28658.8	30055.8
libDIA	O43396	O43396	TXNL1	Thioredoxin-like protein 1	O43396	TXNL1_HUMAN	47230.5	54456.2	51303.2			dirDIA	O60684	O60684	KPNA6	Importin subunit alpha-7	O60684	IMA7_HUMAN	18706	34784	29164
libDIA	O43399	O43399	TPD52L2	Tumor protein D54	O43399	TPD54_HUMAN	46917.1	39928.9	34941.4			dirDIA	O60701	O60701	UGDH	UDP-glucose 6-dehydrogenase	O60701	UGDH_HUMAN	13802.6	11931.4	11265.7
libDIA	O43402	O43402	EMC8	ER membrane protein complex subunit 8	O43402	EMC8_HUMAN	9476.32	15895.8	8235.33			dirDIA	O60711	O60711	LPXN	Leupaxin	O60711	LPXN_HUMAN	56127.4	53109.4	48974.8
libDIA	O43427	O43427	FIBP	Acidic fibroblast growth factor intracellular-binding protein	O43427	FIBP_HUMAN	Filtered	Filtered	2559.08			dirDIA	O60739;P41567	O60739;P41567	EIF1B;EIF1	Eukaryotic translation initiation factor 1b;Eukaryotic translation initiation factor 1	O60739;P41567	EIF1B_HUMAN;EIF1_HUMAN	31110.5	26353.6	30626.1
libDIA	O43447	O43447	PPIH	Peptidyl-prolyl cis-trans isomerase H	O43447	PPIH_HUMAN	26818.2	21903.5	21327.3			dirDIA	O60749	O60749	SNX2	Sorting nexin-2	O60749	SNX2_HUMAN	13285	20413.7	19710.8
libDIA	O43463	O43463	SUV39H1	Histone-lysine N-methyltransferase SUV39H1	O43463	SUV91_HUMAN	Filtered	3233.81	Filtered			dirDIA	O60762	O60762	DPM1	Dolichol-phosphate mannosyltransferase subunit 1	O60762	DPM1_HUMAN	52592.1	50991.1	49653.3
libDIA	O43464	O43464	HTRA2	Serine protease HTRA2, mitochondrial	O43464	HTRA2_HUMAN	19239.3	16654.9	14398.5			dirDIA	O60763	O60763	USO1	General vesicular transport factor p115	O60763	USO1_HUMAN	16160.8	17295.5	14890.8
libDIA	O43488	O43488	AKR7A2	Aflatoxin B1 aldehyde reductase member 2	O43488	ARK72_HUMAN	Filtered	2952.16	5400.69			dirDIA	O60784	O60784	TOM1	Target of Myb protein 1	O60784	TOM1_HUMAN	10289.8	5601.57	5917.49
libDIA	O43491	O43491	EPB41L2	Band 4.1-like protein 2	O43491	E41L2_HUMAN	5422.37	3958.48	3926.8			dirDIA	O60814;P57053;P58876;P62807;Q5QNW6;Q93079;Q99877;Q99879	O60814;P57053;P58876;P62807;Q5QNW6;Q93079;Q99877;Q99879	HIST1H2BK;H2BFS;HIST1H2BD;HIST1H2BC;HIST2H2BF;HIST1H2BH;HIST1H2BN;HIST1H2BM	Histone H2B type 1-K;Histone H2B type F-S;Histone H2B type 1-D;Histone H2B type 1-C/E/F/G/I;Histone H2B type 2-F;Histone H2B type 1-H;Histone H2B type 1-N;Histone H2B type 1-M	O60814;P57053;P58876;P62807;Q5QNW6;Q93079;Q99877;Q99879	H2B1K_HUMAN;H2BFS_HUMAN;H2B1D_HUMAN;H2B1C_HUMAN;H2B2F_HUMAN;H2B1H_HUMAN;H2B1N_HUMAN;H2B1M_HUMAN	1.44956e+06	1064791	1436027
libDIA	O43502	O43502	RAD51C	DNA repair protein RAD51 homolog 3	O43502	RA51C_HUMAN	Filtered	2644.31	2936.5			dirDIA	O60831	O60831	PRAF2	PRA1 family protein 2	O60831	PRAF2_HUMAN	14250	24304.1	20923.8
libDIA	O43504	O43504	LAMTOR5	Ragulator complex protein LAMTOR5	O43504	LTOR5_HUMAN	18187.4	20367.9	21449			dirDIA	O60832	O60832	DKC1	H/ACA ribonucleoprotein complex subunit 4	O60832	DKC1_HUMAN	56778.7	46708.3	47750.6
libDIA	O43516	O43516	WIPF1	WAS/WASL-interacting protein family member 1	O43516	WIPF1_HUMAN	23421.9	45487.6	14903.6			dirDIA	O60841	O60841	EIF5B	Eukaryotic translation initiation factor 5B	O60841	IF2P_HUMAN	67943.5	63413.6	62140.8
libDIA	O43542	O43542	XRCC3	DNA repair protein XRCC3	O43542	XRCC3_HUMAN	Filtered	Filtered	1515.28			dirDIA	O60869	O60869	EDF1	Endothelial differentiation-related factor 1	O60869	EDF1_HUMAN	119917	72735.4	79665.6
libDIA	O43566	O43566	RGS14	Regulator of G-protein signaling 14	O43566	RGS14_HUMAN	6333.81	9402.65	8308.01			dirDIA	O60884	O60884	DNAJA2	DnaJ homolog subfamily A member 2	O60884	DNJA2_HUMAN	20987.5	30486.9	30752.5
libDIA	O43583	O43583	DENR	Density-regulated protein	O43583	DENR_HUMAN	66118.8	41912.4	53225.6			dirDIA	O60885	O60885	BRD4	Bromodomain-containing protein 4	O60885	BRD4_HUMAN	10083.2	9387.66	10001.1
libDIA	O43592	O43592	XPOT	Exportin-T	O43592	XPOT_HUMAN	Filtered	5112.25	4628.14			dirDIA	O60888	O60888	CUTA	Protein CutA	O60888	CUTA_HUMAN	51682.1	51973.9	66057.7
libDIA	O43598	O43598	DNPH1	2'-deoxynucleoside 5'-phosphate N-hydrolase 1	O43598	DNPH1_HUMAN	6332.28	5800.19	5441.01			dirDIA	O60925	O60925	PFDN1	Prefoldin subunit 1	O60925	PFD1_HUMAN	46585.8	37563.9	30978.2
libDIA	O43615	O43615	TIMM44	Mitochondrial import inner membrane translocase subunit TIM44	O43615	TIM44_HUMAN	19287.8	20922.9	19763			dirDIA	O60934	O60934	NBN	Nibrin	O60934	NBN_HUMAN	3883.62	4458.04	4525.25
libDIA	O43617	O43617	TRAPPC3	Trafficking protein particle complex subunit 3	O43617	TPPC3_HUMAN	34663.5	21325.4	19265.8			dirDIA	O75027	O75027	ABCB7	ATP-binding cassette sub-family B member 7, mitochondrial	O75027	ABCB7_HUMAN	3300.62	8639.08	7880.06
libDIA	O43633	O43633	CHMP2A	Charged multivesicular body protein 2a	O43633	CHM2A_HUMAN	23429.8	19202.1	18712.9			dirDIA	O75083	O75083	WDR1	WD repeat-containing protein 1	O75083	WDR1_HUMAN	57184.4	67421.7	64579.1
libDIA	O43660	O43660	PLRG1	Pleiotropic regulator 1	O43660	PLRG1_HUMAN	5393.76	5706.81	6101.48			dirDIA	O75116;Q13464	O75116;Q13464	ROCK2;ROCK1	Rho-associated protein kinase 2;Rho-associated protein kinase 1	O75116;Q13464	ROCK2_HUMAN;ROCK1_HUMAN	1722.1	7933.64	7399.02
libDIA	O43665	O43665	RGS10	Regulator of G-protein signaling 10	O43665	RGS10_HUMAN	1908.15	Filtered	Filtered			dirDIA	O75131	O75131	CPNE3	Copine-3	O75131	CPNE3_HUMAN	21904.7	18008.7	15927.9
libDIA	O43670	O43670	ZNF207	BUB3-interacting and GLEBS motif-containing protein ZNF207	O43670	ZN207_HUMAN	73539.5	61949.6	53503.7			dirDIA	O75150	O75150	RNF40	E3 ubiquitin-protein ligase BRE1B	O75150	BRE1B_HUMAN	7498.11	6582.14	7005.35
libDIA	O43674	O43674	NDUFB5	NADH dehydrogenase [ubiquinone] 1 beta subcomplex subunit 5, mitochondrial	O43674	NDUB5_HUMAN	10994	10290	8924.44			dirDIA	O75151	O75151	PHF2	Lysine-specific demethylase PHF2	O75151	PHF2_HUMAN	750.847	3112.67	3065.53
libDIA	O43676	O43676	NDUFB3	NADH dehydrogenase [ubiquinone] 1 beta subcomplex subunit 3	O43676	NDUB3_HUMAN	18079.7	16825.2	13751.3			dirDIA	O75152	O75152	ZC3H11A	Zinc finger CCCH domain-containing protein 11A	O75152	ZC11A_HUMAN	9699.56	13385.9	10129.8
libDIA	O43678	O43678	NDUFA2	NADH dehydrogenase [ubiquinone] 1 alpha subcomplex subunit 2	O43678	NDUA2_HUMAN	23487.6	21757.3	19871.5			dirDIA	O75153	O75153	CLUH	Clustered mitochondria protein homolog	O75153	CLU_HUMAN	11026	18060.2	19101.2
libDIA	O43681	O43681	ASNA1	ATPase ASNA1	O43681	ASNA_HUMAN	18982.1	26689.2	23651			dirDIA	O75179	O75179	ANKRD17	Ankyrin repeat domain-containing protein 17	O75179	ANR17_HUMAN	6322.14	7170.89	9094.06
libDIA	O43684	O43684	BUB3	Mitotic checkpoint protein BUB3	O43684	BUB3_HUMAN	96204.2	91527.6	94862.4			dirDIA	O75190	O75190	DNAJB6	DnaJ homolog subfamily B member 6	O75190	DNJB6_HUMAN	5054.52	3623.5	3081.46
libDIA	O43707	O43707	ACTN4	Alpha-actinin-4	O43707	ACTN4_HUMAN	42466.6	45726.6	42252.4			dirDIA	O75223	O75223	GGCT	Gamma-glutamylcyclotransferase	O75223	GGCT_HUMAN	24539.5	18938.3	19187.7
libDIA	O43709	O43709	WBSCR22	Probable 18S rRNA (guanine-N(7))-methyltransferase	O43709	WBS22_HUMAN	9988.05	7082.55	7844.48			dirDIA	O75306	O75306	NDUFS2	NADH dehydrogenase [ubiquinone] iron-sulfur protein 2, mitochondrial	O75306	NDUS2_HUMAN	6307.52	9122.03	7932.89
libDIA	O43716	O43716	GATC	Glutamyl-tRNA(Gln) amidotransferase subunit C, mitochondrial	O43716	GATC_HUMAN	Filtered	3549.64	3034.25			dirDIA	O75312	O75312	ZPR1	Zinc finger protein ZPR1	O75312	ZPR1_HUMAN	14968.6	10925.4	12590.2
libDIA	O43719	O43719	HTATSF1	HIV Tat-specific factor 1	O43719	HTSF1_HUMAN	31992.8	24081.4	33892.2			dirDIA	O75323	O75323	GBAS	Protein NipSnap homolog 2	O75323	NIPS2_HUMAN	49215.9	47187.5	43719.3
libDIA	O43747	O43747	AP1G1	AP-1 complex subunit gamma-1	O43747	AP1G1_HUMAN	Filtered	11834	8634.21			dirDIA	O75326	O75326	SEMA7A	Semaphorin-7A	O75326	SEM7A_HUMAN	7142.18	12164.1	11067
libDIA	O43760	O43760	SYNGR2	Synaptogyrin-2	O43760	SNG2_HUMAN	144087	108229	129195			dirDIA	O75340	O75340	PDCD6	Programmed cell death protein 6	O75340	PDCD6_HUMAN	14339.3	21931.3	19782.9
libDIA	O43765	O43765	SGTA	Small glutamine-rich tetratricopeptide repeat-containing protein alpha	O43765	SGTA_HUMAN	23106.4	18862.1	17774.7			dirDIA	O75347	O75347	TBCA	Tubulin-specific chaperone A	O75347	TBCA_HUMAN	134057	84208.1	79347.8
libDIA	O43768	O43768	ENSA	Alpha-endosulfine	O43768	ENSA_HUMAN	40623.9	32430.9	32955.6			dirDIA	O75348	O75348	ATP6V1G1	V-type proton ATPase subunit G 1	O75348	VATG1_HUMAN	37561.8	19218.3	22283.4
libDIA	O43772	O43772	SLC25A20	Mitochondrial carnitine/acylcarnitine carrier protein	O43772	MCAT_HUMAN	8907.01	13310	15449.3			dirDIA	O75351	O75351	VPS4B	Vacuolar protein sorting-associated protein 4B	O75351	VPS4B_HUMAN	2059.34	3263.6	3697.89
libDIA	O43776	O43776	NARS	Asparagine--tRNA ligase, cytoplasmic	O43776	SYNC_HUMAN	37368.2	41375.4	45803.7			dirDIA	O75367	O75367	H2AFY	Core histone macro-H2A.1	O75367	H2AY_HUMAN	157017	188784	170888
libDIA	O43809	O43809	NUDT21	Cleavage and polyadenylation specificity factor subunit 5	O43809	CPSF5_HUMAN	28359.5	37895.2	37123.7			dirDIA	O75368	O75368	SH3BGRL	SH3 domain-binding glutamic acid-rich-like protein	O75368	SH3L1_HUMAN	32447.4	27046.2	27032.3
libDIA	O43813	O43813	LANCL1	LanC-like protein 1	O43813	LANC1_HUMAN	8406.13	6354.51	4445.98			dirDIA	O75369	O75369	FLNB	Filamin-B	O75369	FLNB_HUMAN	2930.49	4209.08	4345.16
libDIA	O43815	O43815	STRN	Striatin	O43815	STRN_HUMAN	5705.46	7180.97	6716.46			dirDIA	O75390	O75390	CS	Citrate synthase, mitochondrial	O75390	CISY_HUMAN	100477	105174	83228.3
libDIA	O43818	O43818	RRP9	U3 small nucleolar RNA-interacting protein 2	O43818	U3IP2_HUMAN	36417.1	35977.8	37327.7			dirDIA	O75396	O75396	SEC22B	Vesicle-trafficking protein SEC22b	O75396	SC22B_HUMAN	54426.6	54470.2	53246.9
libDIA	O43819	O43819	SCO2	Protein SCO2 homolog, mitochondrial	O43819	SCO2_HUMAN	Filtered	7569.16	6011.36			dirDIA	O75400	O75400	PRPF40A	Pre-mRNA-processing factor 40 homolog A	O75400	PR40A_HUMAN	34598.4	40567.6	36701.4
libDIA	O43823	O43823	AKAP8	A-kinase anchor protein 8	O43823	AKAP8_HUMAN	2724.78	2463.75	1971.57			dirDIA	O75410	O75410	TACC1	Transforming acidic coiled-coil-containing protein 1	O75410	TACC1_HUMAN	9547.03	6950.04	7011.52
libDIA	O43824	O43824	GTPBP6	Putative GTP-binding protein 6	O43824	GTPB6_HUMAN	3213.22	1451.48	1744.83			dirDIA	O75436	O75436	VPS26A	Vacuolar protein sorting-associated protein 26A	O75436	VP26A_HUMAN	16208	21136.5	18724.8
libDIA	O43837	O43837	IDH3B	Isocitrate dehydrogenase [NAD] subunit beta, mitochondrial	O43837	IDH3B_HUMAN	31895.7	32039.2	29535			dirDIA	O75439	O75439	PMPCB	Mitochondrial-processing peptidase subunit beta	O75439	MPPB_HUMAN	67411.5	61665	62672.2
libDIA	O43847	O43847	NRD1	Nardilysin	O43847	NRDC_HUMAN	13496.5	10843.5	10501.6			dirDIA	O75475	O75475	PSIP1	PC4 and SFRS1-interacting protein	O75475	PSIP1_HUMAN	44839.9	27764.5	27066.4
libDIA	O43852	O43852	CALU	Calumenin	O43852	CALU_HUMAN	53944.3	33778.8	33565.9			dirDIA	O75489	O75489	NDUFS3	NADH dehydrogenase [ubiquinone] iron-sulfur protein 3, mitochondrial	O75489	NDUS3_HUMAN	40583.3	55515.8	45698.4
libDIA	O43865	O43865	AHCYL1	Adenosylhomocysteinase 2	O43865	SAHH2_HUMAN	Filtered	4930.18	5332.93			dirDIA	O75494	O75494	SRSF10	Serine/arginine-rich splicing factor 10	O75494	SRS10_HUMAN	27600.4	35344.3	36748.2
libDIA	O43913	O43913	ORC5	Origin recognition complex subunit 5	O43913	ORC5_HUMAN	4036.44	6554.6	5379.41			dirDIA	O75530	O75530	EED	Polycomb protein EED	O75530	EED_HUMAN	7139.25	11387.8	9736.28
libDIA	O43920	O43920	NDUFS5	NADH dehydrogenase [ubiquinone] iron-sulfur protein 5	O43920	NDUS5_HUMAN	13499.4	19435.9	15025.3			dirDIA	O75533	O75533	SF3B1	Splicing factor 3B subunit 1	O75533	SF3B1_HUMAN	66301.6	49184.8	50451.8
libDIA	O43924	O43924	PDE6D	Retinal rod rhodopsin-sensitive cGMP 3',5'-cyclic phosphodiesterase subunit delta	O43924	PDE6D_HUMAN	Filtered	6360.01	5671.5			dirDIA	O75534	O75534	CSDE1	Cold shock domain-containing protein E1	O75534	CSDE1_HUMAN	51260.6	50043.1	52409.2
libDIA	O60216	O60216	RAD21	Double-strand-break repair protein rad21 homolog	O60216	RAD21_HUMAN	27132.5	27431.9	25179.1			dirDIA	O75569	O75569	PRKRA	Interferon-inducible double-stranded RNA-dependent protein kinase activator A	O75569	PRKRA_HUMAN	1595.32	6944.76	6079.69
libDIA	O60220	O60220	TIMM8A	Mitochondrial import inner membrane translocase subunit Tim8 A	O60220	TIM8A_HUMAN	17468.2	19110.2	17475.8			dirDIA	O75600	O75600	GCAT	2-amino-3-ketobutyrate coenzyme A ligase, mitochondrial	O75600	KBL_HUMAN	7344.04	6158.17	7812.38
libDIA	O60231	O60231	DHX16	Putative pre-mRNA-splicing factor ATP-dependent RNA helicase DHX16	O60231	DHX16_HUMAN	10397.4	9049.22	10760.7			dirDIA	O75607	O75607	NPM3	Nucleoplasmin-3	O75607	NPM3_HUMAN	39228.5	13614.2	16256
libDIA	O60232	O60232	SSSCA1	Sjoegren syndrome/scleroderma autoantigen 1	O60232	SSA27_HUMAN	16023.9	14860.2	12701.5			dirDIA	O75608	O75608	LYPLA1	Acyl-protein thioesterase 1	O75608	LYPA1_HUMAN	65934.2	49096.5	48945.1
libDIA	O60234	O60234	GMFG	Glia maturation factor gamma	O60234	GMFG_HUMAN	41645.3	27457	26630.5			dirDIA	O75616	O75616	ERAL1	GTPase Era, mitochondrial	O75616	ERAL1_HUMAN	15478.2	17795.2	16905.6
libDIA	O60256	O60256	PRPSAP2	Phosphoribosyl pyrophosphate synthase-associated protein 2	O60256	KPRB_HUMAN	57377.4	74392.6	59858.9			dirDIA	O75643	O75643	SNRNP200	U5 small nuclear ribonucleoprotein 200 kDa helicase	O75643	U520_HUMAN	37608.3	50429.8	49825.7
libDIA	O60264	O60264	SMARCA5	SWI/SNF-related matrix-associated actin-dependent regulator of chromatin subfamily A member 5	O60264	SMCA5_HUMAN	73108.5	53880.6	56483.7			dirDIA	O75663	O75663	TIPRL	TIP41-like protein	O75663	TIPRL_HUMAN	Filtered	1688.1	2706.33
libDIA	O60271	O60271	SPAG9	C-Jun-amino-terminal kinase-interacting protein 4	O60271	JIP4_HUMAN	9234.85	2549.49	3068.38			dirDIA	O75683	O75683	SURF6	Surfeit locus protein 6	O75683	SURF6_HUMAN	20090.3	26745.7	25212.5
libDIA	O60287	O60287	URB1	Nucleolar pre-ribosomal-associated protein 1	O60287	NPA1P_HUMAN	12656.9	8900.74	8593.84			dirDIA	O75691	O75691	UTP20	Small subunit processome component 20 homolog	O75691	UTP20_HUMAN	9433.97	14887.9	13128.1
libDIA	O60306	O60306	AQR	Intron-binding protein aquarius	O60306	AQR_HUMAN	21603.5	10289	21056.5			dirDIA	O75694	O75694	NUP155	Nuclear pore complex protein Nup155	O75694	NU155_HUMAN	25127.9	19156	24380.9
libDIA	O60313	O60313	OPA1	Dynamin-like 120 kDa protein, mitochondrial	O60313	OPA1_HUMAN	12991.6	14780.6	13609.9			dirDIA	O75717	O75717	WDHD1	WD repeat and HMG-box DNA-binding protein 1	O75717	WDHD1_HUMAN	5241.53	7256.49	5938.55
libDIA	O60318	O60318	MCM3AP	Germinal-center associated nuclear protein	O60318	GANP_HUMAN	Filtered	2459.86	1817.96			dirDIA	O75746	O75746	SLC25A12	Calcium-binding mitochondrial carrier protein Aralar1	O75746	CMC1_HUMAN	14094.6	15202.7	13749.6
libDIA	O60341	O60341	KDM1A	Lysine-specific histone demethylase 1A	O60341	KDM1A_HUMAN	7657.66	13109.1	16662.6			dirDIA	O75791	O75791	GRAP2	GRB2-related adapter protein 2	O75791	GRAP2_HUMAN	25639.9	27683.7	29696
libDIA	O60361	O60361	NME2P1	Putative nucleoside diphosphate kinase	O60361	NDK8_HUMAN	58777.7	31888.9	23324			dirDIA	O75792	O75792	RNASEH2A	Ribonuclease H2 subunit A	O75792	RNH2A_HUMAN	6845.6	7676.97	7157.75
libDIA	O60443	O60443	DFNA5	Non-syndromic hearing impairment protein 5	O60443	DFNA5_HUMAN	19661.3	19256	25314.1			dirDIA	O75794	O75794	CDC123	Cell division cycle protein 123 homolog	O75794	CD123_HUMAN	9153.97	14917.9	14090.6
libDIA	O60449	O60449	LY75	Lymphocyte antigen 75	O60449	LY75_HUMAN	3050.48	5593.84	5382.21			dirDIA	O75821	O75821	EIF3G	Eukaryotic translation initiation factor 3 subunit G	O75821	EIF3G_HUMAN	92384	83242.5	76036.8
libDIA	O60476	O60476	MAN1A2	Mannosyl-oligosaccharide 1,2-alpha-mannosidase IB	O60476	MA1A2_HUMAN	Filtered	3175.57	Filtered			dirDIA	O75822	O75822	EIF3J	Eukaryotic translation initiation factor 3 subunit J	O75822	EIF3J_HUMAN	67097.9	44914.5	52163
libDIA	O60488	O60488	ACSL4	Long-chain-fatty-acid--CoA ligase 4	O60488	ACSL4_HUMAN	5915.24	10006.8	8797.8			dirDIA	O75874	O75874	IDH1	Isocitrate dehydrogenase [NADP] cytoplasmic	O75874	IDHC_HUMAN	7988.49	8944.73	8585.36
libDIA	O60493	O60493	SNX3	Sorting nexin-3	O60493	SNX3_HUMAN	16814.9	18762.1	16939.4			dirDIA	O75886	O75886	STAM2	Signal transducing adapter molecule 2	O75886	STAM2_HUMAN	1498.71	2402.46	2474.46
libDIA	O60499	O60499	STX10	Syntaxin-10	O60499	STX10_HUMAN	2835.48	4170.92	3464.87			dirDIA	O75909	O75909	CCNK	Cyclin-K	O75909	CCNK_HUMAN	5141.26	14263.3	11714
libDIA	O60502	O60502	MGEA5	Protein O-GlcNAcase	O60502	OGA_HUMAN	10766.7	9026.67	10268.4			dirDIA	O75915	O75915	ARL6IP5	PRA1 family protein 3	O75915	PRAF3_HUMAN	8151.29	5849.78	9782.9
libDIA	O60506	O60506	SYNCRIP	Heterogeneous nuclear ribonucleoprotein Q	O60506	HNRPQ_HUMAN	212388	198308	204671			dirDIA	O75925;O75928	O75925;O75928	PIAS1;PIAS2	E3 SUMO-protein ligase PIAS1;E3 SUMO-protein ligase PIAS2	O75925;O75928	PIAS1_HUMAN;PIAS2_HUMAN	2126.24	2512.08	2687.1
libDIA	O60508	O60508	CDC40	Pre-mRNA-processing factor 17	O60508	PRP17_HUMAN	2822.85	2573.61	2582.31			dirDIA	O75934	O75934	BCAS2	Pre-mRNA-splicing factor SPF27	O75934	SPF27_HUMAN	6446.53	9601.35	11332.4
libDIA	O60524	O60524	NEMF	Nuclear export mediator factor NEMF	O60524	NEMF_HUMAN	10692.8	12059.4	7860.09			dirDIA	O75935	O75935	DCTN3	Dynactin subunit 3	O75935	DCTN3_HUMAN	16386.5	9677.71	9679.39
libDIA	O60547	O60547	GMDS	GDP-mannose 4,6 dehydratase	O60547	GMDS_HUMAN	10415.3	12625.7	13019.7			dirDIA	O75937	O75937	DNAJC8	DnaJ homolog subfamily C member 8	O75937	DNJC8_HUMAN	61396.4	50198.4	46959.6
libDIA	O60566	O60566	BUB1B	Mitotic checkpoint serine/threonine-protein kinase BUB1 beta	O60566	BUB1B_HUMAN	Filtered	3444.38	2828.72			dirDIA	O75940	O75940	SMNDC1	Survival of motor neuron-related-splicing factor 30	O75940	SPF30_HUMAN	19177.4	17907.8	16484.4
libDIA	O60568	O60568	PLOD3	Procollagen-lysine,2-oxoglutarate 5-dioxygenase 3	O60568	PLOD3_HUMAN	5604.92	7203.9	5916.99			dirDIA	O75947	O75947	ATP5H	ATP synthase subunit d, mitochondrial	O75947	ATP5H_HUMAN	55131.7	58424.1	50164.5
libDIA	O60610	O60610	DIAPH1	Protein diaphanous homolog 1	O60610	DIAP1_HUMAN	15132.9	18373.9	17896.3			dirDIA	O75955	O75955	FLOT1	Flotillin-1	O75955	FLOT1_HUMAN	13747.7	14846.8	14537.5
libDIA	O60664	O60664	PLIN3	Perilipin-3	O60664	PLIN3_HUMAN	27836.4	21795.6	20399.3			dirDIA	O75964	O75964	ATP5L	ATP synthase subunit g, mitochondrial	O75964	ATP5L_HUMAN	117747	136383	112947
libDIA	O60671	O60671	RAD1	Cell cycle checkpoint protein RAD1	O60671	RAD1_HUMAN	5865.86	7003.97	7358.01			dirDIA	O75995	O75995	SASH3	SAM and SH3 domain-containing protein 3	O75995	SASH3_HUMAN	8565.67	9260.28	12759
libDIA	O60678	O60678	PRMT3	Protein arginine N-methyltransferase 3	O60678	ANM3_HUMAN	14869.5	10091.3	10290.9			dirDIA	O76003	O76003	GLRX3	Glutaredoxin-3	O76003	GLRX3_HUMAN	125080	105233	113343
libDIA	O60684	O60684	KPNA6	Importin subunit alpha-7	O60684	IMA7_HUMAN	34134.8	38599	15849.8			dirDIA	O76021	O76021	RSL1D1	Ribosomal L1 domain-containing protein 1	O76021	RL1D1_HUMAN	89966.9	80080.4	73229.7
libDIA	O60701	O60701	UGDH	UDP-glucose 6-dehydrogenase	O60701	UGDH_HUMAN	18356.4	11688	11313.1			dirDIA	O76031	O76031	CLPX	ATP-dependent Clp protease ATP-binding subunit clpX-like, mitochondrial	O76031	CLPX_HUMAN	5837.59	13926.2	12480.1
libDIA	O60711	O60711	LPXN	Leupaxin	O60711	LPXN_HUMAN	56300	18982.4	25616			dirDIA	O76094	O76094	SRP72	Signal recognition particle subunit SRP72	O76094	SRP72_HUMAN	19199	17902.1	16083.8
libDIA	O60739;P41567	O60739;P41567	EIF1B;EIF1	Eukaryotic translation initiation factor 1b;Eukaryotic translation initiation factor 1	O60739;P41567	EIF1B_HUMAN;EIF1_HUMAN	39902.1	32165.1	35511.3			dirDIA	O94776	O94776	MTA2	Metastasis-associated protein MTA2	O94776	MTA2_HUMAN	51907.5	55953	52810.8
libDIA	O60749	O60749	SNX2	Sorting nexin-2	O60749	SNX2_HUMAN	18564.5	20542.6	18404.7			dirDIA	O94804	O94804	STK10	Serine/threonine-protein kinase 10	O94804	STK10_HUMAN	5100.93	9379.98	11683.9
libDIA	O60762	O60762	DPM1	Dolichol-phosphate mannosyltransferase subunit 1	O60762	DPM1_HUMAN	45491.1	55006.3	47397.1			dirDIA	O94826	O94826	TOMM70A	Mitochondrial import receptor subunit TOM70	O94826	TOM70_HUMAN	31947.8	37084.9	33873.6
libDIA	O60763	O60763	USO1	General vesicular transport factor p115	O60763	USO1_HUMAN	12609.2	14187.1	12693.9			dirDIA	O94874	O94874	UFL1	E3 UFM1-protein ligase 1	O94874	UFL1_HUMAN	4504.31	11867.1	11913.8
libDIA	O60784	O60784	TOM1	Target of Myb protein 1	O60784	TOM1_HUMAN	8204.38	5823.25	6281.58			dirDIA	O94888	O94888	UBXN7	UBX domain-containing protein 7	O94888	UBXN7_HUMAN	4659.75	3355.78	3161.96
libDIA	O60814;P58876;P62807;Q5QNW6;Q93079;Q99877;Q99879	O60814;P58876;P62807;Q5QNW6;Q93079;Q99877;Q99879	HIST1H2BK;HIST1H2BD;HIST1H2BC;HIST2H2BF;HIST1H2BH;HIST1H2BN;HIST1H2BM	Histone H2B type 1-K;Histone H2B type 1-D;Histone H2B type 1-C/E/F/G/I;Histone H2B type 2-F;Histone H2B type 1-H;Histone H2B type 1-N;Histone H2B type 1-M	O60814;P58876;P62807;Q5QNW6;Q93079;Q99877;Q99879	H2B1K_HUMAN;H2B1D_HUMAN;H2B1C_HUMAN;H2B2F_HUMAN;H2B1H_HUMAN;H2B1N_HUMAN;H2B1M_HUMAN	1450224	1.38364e+06	1.44533e+06			dirDIA	O94901	O94901	SUN1	SUN domain-containing protein 1	O94901	SUN1_HUMAN	4285.45	7515.09	8343.36
libDIA	O60826	O60826	CCDC22	Coiled-coil domain-containing protein 22	O60826	CCD22_HUMAN	Filtered	6565.1	6845.51			dirDIA	O94903	O94903	PROSC	Proline synthase co-transcribed bacterial homolog protein	O94903	PROSC_HUMAN	22121	19176	23351.2
libDIA	O60828	O60828	PQBP1	Polyglutamine-binding protein 1	O60828	PQBP1_HUMAN	4185.61	4852.73	3050.54			dirDIA	O94905	O94905	ERLIN2	Erlin-2	O94905	ERLN2_HUMAN	31023.3	31164.5	31547.6
libDIA	O60831	O60831	PRAF2	PRA1 family protein 2	O60831	PRAF2_HUMAN	14256.5	24513.7	21518.6			dirDIA	O94906	O94906	PRPF6	Pre-mRNA-processing factor 6	O94906	PRP6_HUMAN	37993	32147.6	31891.5
libDIA	O60832	O60832	DKC1	H/ACA ribonucleoprotein complex subunit 4	O60832	DKC1_HUMAN	43373.9	38193.2	36790			dirDIA	O94919	O94919	ENDOD1	Endonuclease domain-containing 1 protein	O94919	ENDD1_HUMAN	595.1	2799.06	951.83
libDIA	O60841	O60841	EIF5B	Eukaryotic translation initiation factor 5B	O60841	IF2P_HUMAN	70118.3	63172.3	61552.1			dirDIA	O94925	O94925	GLS	Glutaminase kidney isoform, mitochondrial	O94925	GLSK_HUMAN	47950	40001.5	38215.4
libDIA	O60869	O60869	EDF1	Endothelial differentiation-related factor 1	O60869	EDF1_HUMAN	120962	74171.5	80214.5			dirDIA	O94979	O94979	SEC31A	Protein transport protein Sec31A	O94979	SC31A_HUMAN	24790.4	31978.7	28605.4
libDIA	O60870	O60870	KIN	DNA/RNA-binding protein KIN17	O60870	KIN17_HUMAN	Filtered	3785.59	4846.97			dirDIA	O94992	O94992	HEXIM1	Protein HEXIM1	O94992	HEXI1_HUMAN	554.109	3273.88	4405.51
libDIA	O60884	O60884	DNAJA2	DnaJ homolog subfamily A member 2	O60884	DNJA2_HUMAN	21812.2	29807.2	29696.3			dirDIA	O95070	O95070	YIF1A	Protein YIF1A	O95070	YIF1A_HUMAN	4374.11	2670.92	4060.01
libDIA	O60885	O60885	BRD4	Bromodomain-containing protein 4	O60885	BRD4_HUMAN	11451.1	9471.6	9465.37			dirDIA	O95104	O95104	SCAF4	Splicing factor, arginine/serine-rich 15	O95104	SFR15_HUMAN	14493.2	23709.7	26175.4
libDIA	O60888	O60888	CUTA	Protein CutA	O60888	CUTA_HUMAN	51798.5	28314.6	35675			dirDIA	O95163	O95163	IKBKAP	Elongator complex protein 1	O95163	ELP1_HUMAN	14980	8714.51	11111.4
libDIA	O60925	O60925	PFDN1	Prefoldin subunit 1	O60925	PFD1_HUMAN	30442.1	23954.3	20452.4			dirDIA	O95167	O95167	NDUFA3	NADH dehydrogenase [ubiquinone] 1 alpha subcomplex subunit 3	O95167	NDUA3_HUMAN	17511.9	15603.9	14182.8
libDIA	O60930	O60930	RNASEH1	Ribonuclease H1	O60930	RNH1_HUMAN	Filtered	4263.4	2720.06			dirDIA	O95168	O95168	NDUFB4	NADH dehydrogenase [ubiquinone] 1 beta subcomplex subunit 4	O95168	NDUB4_HUMAN	13897.9	24394.7	22203
libDIA	O60934	O60934	NBN	Nibrin	O60934	NBN_HUMAN	7697.23	7543.59	7053.35			dirDIA	O95182	O95182	NDUFA7	NADH dehydrogenase [ubiquinone] 1 alpha subcomplex subunit 7	O95182	NDUA7_HUMAN	8545.96	6662.8	8062.03
libDIA	O60942	O60942	RNGTT	mRNA-capping enzyme	O60942	MCE1_HUMAN	Filtered	1332.1	1136.08			dirDIA	O95202	O95202	LETM1	LETM1 and EF-hand domain-containing protein 1, mitochondrial	O95202	LETM1_HUMAN	17292.5	19358.7	15489.7
libDIA	O75027	O75027	ABCB7	ATP-binding cassette sub-family B member 7, mitochondrial	O75027	ABCB7_HUMAN	Filtered	8863.14	8339.89			dirDIA	O95218	O95218	ZRANB2	Zinc finger Ran-binding domain-containing protein 2	O95218	ZRAB2_HUMAN	15171.4	5397.56	6046
libDIA	O75083	O75083	WDR1	WD repeat-containing protein 1	O75083	WDR1_HUMAN	65821	69361.2	67062.1			dirDIA	O95229	O95229	ZWINT	ZW10 interactor	O95229	ZWINT_HUMAN	14303.5	11483.3	10410.2
libDIA	O75122	O75122	CLASP2	CLIP-associating protein 2	O75122	CLAP2_HUMAN	Filtered	8760.29	12534.1			dirDIA	O95232	O95232	LUC7L3	Luc7-like protein 3	O95232	LC7L3_HUMAN	11413.7	12045	12261
libDIA	O75127	O75127	PTCD1	Pentatricopeptide repeat-containing protein 1, mitochondrial	O75127	PTCD1_HUMAN	Filtered	3599.91	1731.87			dirDIA	O95239	O95239	KIF4A	Chromosome-associated kinesin KIF4A	O95239	KIF4A_HUMAN	2244.8	3131.3	4579.27
libDIA	O75131	O75131	CPNE3	Copine-3	O75131	CPNE3_HUMAN	7333.07	8858.65	9249.27			dirDIA	O95249	O95249	GOSR1	Golgi SNAP receptor complex member 1	O95249	GOSR1_HUMAN	431.379	3121.8	3030.15
libDIA	O75144	O75144	ICOSLG	ICOS ligand	O75144	ICOSL_HUMAN	Filtered	Filtered	2133.59			dirDIA	O95297	O95297	MPZL1	Myelin protein zero-like protein 1	O95297	MPZL1_HUMAN	11302.2	12853.2	9307.39
libDIA	O75146	O75146	HIP1R	Huntingtin-interacting protein 1-related protein	O75146	HIP1R_HUMAN	Filtered	2706.66	Filtered			dirDIA	O95298	O95298	NDUFC2	NADH dehydrogenase [ubiquinone] 1 subunit C2	O95298	NDUC2_HUMAN	11536.1	10617.2	11456.9
libDIA	O75150	O75150	RNF40	E3 ubiquitin-protein ligase BRE1B	O75150	BRE1B_HUMAN	14170.1	12972.2	12913.8			dirDIA	O95299	O95299	NDUFA10	NADH dehydrogenase [ubiquinone] 1 alpha subcomplex subunit 10, mitochondrial	O95299	NDUAA_HUMAN	7071.56	7022.04	6756.33
libDIA	O75151	O75151	PHF2	Lysine-specific demethylase PHF2	O75151	PHF2_HUMAN	793424	323283	344676			dirDIA	O95319	O95319	CELF2	CUGBP Elav-like family member 2	O95319	CELF2_HUMAN	8334.2	9039.69	7294.68
libDIA	O75152	O75152	ZC3H11A	Zinc finger CCCH domain-containing protein 11A	O75152	ZC11A_HUMAN	15342.1	19069.5	16287.3			dirDIA	O95336	O95336	PGLS	6-phosphogluconolactonase	O95336	6PGL_HUMAN	80840.5	84878.2	84258.8
libDIA	O75153	O75153	CLUH	Clustered mitochondria protein homolog	O75153	CLU_HUMAN	19168.4	19089.2	18837.4			dirDIA	O95347	O95347	SMC2	Structural maintenance of chromosomes protein 2	O95347	SMC2_HUMAN	81300.5	79385.5	81391.7
libDIA	O75165	O75165	DNAJC13	DnaJ homolog subfamily C member 13	O75165	DJC13_HUMAN	3129.38	2744.43	3442.86			dirDIA	O95372	O95372	LYPLA2	Acyl-protein thioesterase 2	O95372	LYPA2_HUMAN	5632.07	4349.04	5050.13
libDIA	O75170	O75170	PPP6R2	Serine/threonine-protein phosphatase 6 regulatory subunit 2	O75170	PP6R2_HUMAN	Filtered	1994.9	2531.35			dirDIA	O95373	O95373	IPO7	Importin-7	O95373	IPO7_HUMAN	37572	24652.2	23174.4
libDIA	O75175	O75175	CNOT3	CCR4-NOT transcription complex subunit 3	O75175	CNOT3_HUMAN	7152.17	10996.2	11952.3			dirDIA	O95394	O95394	PGM3	Phosphoacetylglucosamine mutase	O95394	AGM1_HUMAN	3974.54	4552.66	4632.84
libDIA	O75179	O75179	ANKRD17	Ankyrin repeat domain-containing protein 17	O75179	ANR17_HUMAN	5896.66	6924.62	6949.36			dirDIA	O95400	O95400	CD2BP2	CD2 antigen cytoplasmic tail-binding protein 2	O95400	CD2B2_HUMAN	26770.3	14403.8	16998.2
libDIA	O75190	O75190	DNAJB6	DnaJ homolog subfamily B member 6	O75190	DNJB6_HUMAN	10876.1	6923.75	6001.26			dirDIA	O95433	O95433	AHSA1	Activator of 90 kDa heat shock protein ATPase homolog 1	O95433	AHSA1_HUMAN	75618.8	77334.1	69576.7
libDIA	O75208	O75208	COQ9	Ubiquinone biosynthesis protein COQ9, mitochondrial	O75208	COQ9_HUMAN	9712.58	6758.4	5213.28			dirDIA	O95453	O95453	PARN	Poly(A)-specific ribonuclease PARN	O95453	PARN_HUMAN	6753.65	4872.08	4757.32
libDIA	O75223	O75223	GGCT	Gamma-glutamylcyclotransferase	O75223	GGCT_HUMAN	25145.7	18982.3	19333.8			dirDIA	O95456	O95456	PSMG1	Proteasome assembly chaperone 1	O95456	PSMG1_HUMAN	9978.81	16698.9	16418.1
libDIA	O75251	O75251	NDUFS7	NADH dehydrogenase [ubiquinone] iron-sulfur protein 7, mitochondrial	O75251	NDUS7_HUMAN	1488.37	3793.23	2651.91			dirDIA	O95466	O95466	FMNL1	Formin-like protein 1	O95466	FMNL1_HUMAN	Filtered	4130.03	4516.57
libDIA	O75306	O75306	NDUFS2	NADH dehydrogenase [ubiquinone] iron-sulfur protein 2, mitochondrial	O75306	NDUS2_HUMAN	4129.02	5357.96	5606.81			dirDIA	O95478	O95478	NSA2	Ribosome biogenesis protein NSA2 homolog	O95478	NSA2_HUMAN	41619.5	53490.1	46379.8
libDIA	O75312	O75312	ZPR1	Zinc finger protein ZPR1	O75312	ZPR1_HUMAN	13562.3	5729.31	5304.71			dirDIA	O95486	O95486	SEC24A	Protein transport protein Sec24A	O95486	SC24A_HUMAN	9490.09	14142.2	14455
libDIA	O75323	O75323	GBAS	Protein NipSnap homolog 2	O75323	NIPS2_HUMAN	51323.9	50186.3	45857.8			dirDIA	O95571	O95571	ETHE1	Persulfide dioxygenase ETHE1, mitochondrial	O95571	ETHE1_HUMAN	9045.4	11218.7	9871.25
libDIA	O75326	O75326	SEMA7A	Semaphorin-7A	O75326	SEM7A_HUMAN	5450.13	11671.3	12319.2			dirDIA	O95573	O95573	ACSL3	Long-chain-fatty-acid--CoA ligase 3	O95573	ACSL3_HUMAN	10907.4	12289.3	10162.1
libDIA	O75330	O75330	HMMR	Hyaluronan mediated motility receptor	O75330	HMMR_HUMAN	11363.1	4805.73	1970.91			dirDIA	O95602	O95602	POLR1A	DNA-directed RNA polymerase I subunit RPA1	O95602	RPA1_HUMAN	4897.78	5689.66	5728.12
libDIA	O75340	O75340	PDCD6	Programmed cell death protein 6	O75340	PDCD6_HUMAN	9972.49	13796.4	14389.2			dirDIA	O95671	O95671	ASMTL	N-acetylserotonin O-methyltransferase-like protein	O95671	ASML_HUMAN	358.578	2594.58	2698
libDIA	O75347	O75347	TBCA	Tubulin-specific chaperone A	O75347	TBCA_HUMAN	138534	83722.5	77942.4			dirDIA	O95721	O95721	SNAP29	Synaptosomal-associated protein 29	O95721	SNP29_HUMAN	13579.3	7235.93	7175.33
libDIA	O75348	O75348	ATP6V1G1	V-type proton ATPase subunit G 1	O75348	VATG1_HUMAN	38234.9	19860.8	23332.6			dirDIA	O95747	O95747	OXSR1	Serine/threonine-protein kinase OSR1	O95747	OXSR1_HUMAN	29347.3	27121.4	26601.7
libDIA	O75351	O75351	VPS4B	Vacuolar protein sorting-associated protein 4B	O75351	VPS4B_HUMAN	Filtered	4174.11	4284.43			dirDIA	O95757	O95757	HSPA4L	Heat shock 70 kDa protein 4L	O95757	HS74L_HUMAN	66452.9	58358.2	55632.2
libDIA	O75352	O75352	MPDU1	Mannose-P-dolichol utilization defect 1 protein	O75352	MPU1_HUMAN	5266.45	7486.15	7617.31			dirDIA	O95772	O95772	STARD3NL	MLN64 N-terminal domain homolog	O95772	MENTO_HUMAN	18964.7	17031.5	14719.8
libDIA	O75362	O75362	ZNF217	Zinc finger protein 217	O75362	ZN217_HUMAN	Filtered	2075.75	1562.63			dirDIA	O95777	O95777	LSM8	U6 snRNA-associated Sm-like protein LSm8	O95777	LSM8_HUMAN	23335.4	10328.2	7633.19
libDIA	O75367	O75367	H2AFY	Core histone macro-H2A.1	O75367	H2AY_HUMAN	146170	184694	157419			dirDIA	O95782	O95782	AP2A1	AP-2 complex subunit alpha-1	O95782	AP2A1_HUMAN	15497.7	20447.7	20347.4
libDIA	O75368	O75368	SH3BGRL	SH3 domain-binding glutamic acid-rich-like protein	O75368	SH3L1_HUMAN	31946.8	28957.7	29269.4			dirDIA	O95793	O95793	STAU1	Double-stranded RNA-binding protein Staufen homolog 1	O95793	STAU1_HUMAN	24425.5	19904.3	19843.5
libDIA	O75369	O75369	FLNB	Filamin-B	O75369	FLNB_HUMAN	4729.28	4670.06	5386.74			dirDIA	O95801	O95801	TTC4	Tetratricopeptide repeat protein 4	O95801	TTC4_HUMAN	2189.88	4220.67	5475.69
libDIA	O75376	O75376	NCOR1	Nuclear receptor corepressor 1	O75376	NCOR1_HUMAN	Filtered	1045.57	Filtered			dirDIA	O95816	O95816	BAG2	BAG family molecular chaperone regulator 2	O95816	BAG2_HUMAN	12496.2	13691.7	13990.6
libDIA	O75380	O75380	NDUFS6	NADH dehydrogenase [ubiquinone] iron-sulfur protein 6, mitochondrial	O75380	NDUS6_HUMAN	Filtered	6352.77	5584.56			dirDIA	O95831	O95831	AIFM1	Apoptosis-inducing factor 1, mitochondrial	O95831	AIFM1_HUMAN	39279.9	36741.1	37710.3
libDIA	O75381	O75381	PEX14	Peroxisomal membrane protein PEX14	O75381	PEX14_HUMAN	16930	12604.2	7477.79			dirDIA	O95834	O95834	EML2	Echinoderm microtubule-associated protein-like 2	O95834	EMAL2_HUMAN	1587.51	3751.61	4053.61
libDIA	O75390	O75390	CS	Citrate synthase, mitochondrial	O75390	CISY_HUMAN	94923.8	107320	89677.2			dirDIA	O95861	O95861	BPNT1	3'(2'),5'-bisphosphate nucleotidase 1	O95861	BPNT1_HUMAN	29647.7	21228.8	17163.7
libDIA	O75391	O75391	SPAG7	Sperm-associated antigen 7	O75391	SPAG7_HUMAN	Filtered	2243.55	1393.85			dirDIA	O95864	O95864	FADS2	Fatty acid desaturase 2	O95864	FADS2_HUMAN	8781.83	14343.2	14400
libDIA	O75394	O75394	MRPL33	39S ribosomal protein L33, mitochondrial	O75394	RM33_HUMAN	Filtered	1909.59	Filtered			dirDIA	O95881	O95881	TXNDC12	Thioredoxin domain-containing protein 12	O95881	TXD12_HUMAN	34291.6	31292.5	29306.7
libDIA	O75396	O75396	SEC22B	Vesicle-trafficking protein SEC22b	O75396	SC22B_HUMAN	35787.5	27759.6	26479.3			dirDIA	O95989	O95989	NUDT3	Diphosphoinositol polyphosphate phosphohydrolase 1	O95989	NUDT3_HUMAN	7557.65	9669.77	8924.75
libDIA	O75400	O75400	PRPF40A	Pre-mRNA-processing factor 40 homolog A	O75400	PR40A_HUMAN	26591	36797.8	31812.8			dirDIA	O95999	O95999	BCL10	B-cell lymphoma/leukemia 10	O95999	BCL10_HUMAN	8543.76	11352.2	11317.6
libDIA	O75410	O75410	TACC1	Transforming acidic coiled-coil-containing protein 1	O75410	TACC1_HUMAN	5324.93	6934.1	5234.71			dirDIA	O96000	O96000	NDUFB10	NADH dehydrogenase [ubiquinone] 1 beta subcomplex subunit 10	O96000	NDUBA_HUMAN	24958	22565.2	24439.4
libDIA	O75414	O75414	NME6	Nucleoside diphosphate kinase 6	O75414	NDK6_HUMAN	Filtered	1273.01	2247.24			dirDIA	O96008	O96008	TOMM40	Mitochondrial import receptor subunit TOM40 homolog	O96008	TOM40_HUMAN	24141.3	20889.6	19920.3
libDIA	O75419	O75419	CDC45	Cell division control protein 45 homolog	O75419	CDC45_HUMAN	Filtered	9283.43	8074.8			dirDIA	O96019	O96019	ACTL6A	Actin-like protein 6A	O96019	ACL6A_HUMAN	20184.3	16970.8	16033.2
libDIA	O75427	O75427	LRCH4	Leucine-rich repeat and calponin homology domain-containing protein 4	O75427	LRCH4_HUMAN	Filtered	6342.62	5772.47			dirDIA	O96028	O96028	WHSC1	Histone-lysine N-methyltransferase NSD2	O96028	NSD2_HUMAN	802.183	3026.19	2560.88
libDIA	O75436	O75436	VPS26A	Vacuolar protein sorting-associated protein 26A	O75436	VP26A_HUMAN	17607.9	19595.4	17816.9			dirDIA	P00167	P00167	CYB5A	Cytochrome b5	P00167	CYB5_HUMAN	17835.6	17609.5	16784
libDIA	O75439	O75439	PMPCB	Mitochondrial-processing peptidase subunit beta	O75439	MPPB_HUMAN	67624.8	58873.7	60157.4			dirDIA	P00338	P00338	LDHA	L-lactate dehydrogenase A chain	P00338	LDHA_HUMAN	1.67083e+06	1.27472e+06	1369240
libDIA	O75448	O75448	MED24	Mediator of RNA polymerase II transcription subunit 24	O75448	MED24_HUMAN	Filtered	2359.74	2101.81			dirDIA	P00367	P00367	GLUD1	Glutamate dehydrogenase 1, mitochondrial	P00367	DHE3_HUMAN	13904.1	12556.8	14416
libDIA	O75475	O75475	PSIP1	PC4 and SFRS1-interacting protein	O75475	PSIP1_HUMAN	48876	33779.2	16797.7			dirDIA	P00374	P00374	DHFR	Dihydrofolate reductase	P00374	DYR_HUMAN	28895.1	22905.2	25271.2
libDIA	O75477	O75477	ERLIN1	Erlin-1	O75477	ERLN1_HUMAN	25204.2	26356.3	26965.4			dirDIA	P00387	P00387	CYB5R3	NADH-cytochrome b5 reductase 3	P00387	NB5R3_HUMAN	24355.8	31900.3	29020
libDIA	O75489	O75489	NDUFS3	NADH dehydrogenase [ubiquinone] iron-sulfur protein 3, mitochondrial	O75489	NDUS3_HUMAN	41584.8	44835.3	42107.6			dirDIA	P00390	P00390	GSR	Glutathione reductase, mitochondrial	P00390	GSHR_HUMAN	21832	26165.7	26273.2
libDIA	O75494	O75494	SRSF10	Serine/arginine-rich splicing factor 10	O75494	SRS10_HUMAN	31630.6	36870.5	38510.9			dirDIA	P00403	P00403	MT-CO2	Cytochrome c oxidase subunit 2	P00403	COX2_HUMAN	211659	281260	228322
libDIA	O75496	O75496	GMNN	Geminin	O75496	GEMI_HUMAN	6855.45	2110.7	3894			dirDIA	P00441	P00441	SOD1	Superoxide dismutase [Cu-Zn]	P00441	SODC_HUMAN	92700.3	95487.5	104011
libDIA	O75530	O75530	EED	Polycomb protein EED	O75530	EED_HUMAN	13168.3	14940.2	13195.8			dirDIA	P00491	P00491	PNP	Purine nucleoside phosphorylase	P00491	PNPH_HUMAN	65999.4	56435.8	64010.3
libDIA	O75531	O75531	BANF1	Barrier-to-autointegration factor	O75531	BAF_HUMAN	64856.9	22927.2	20727			dirDIA	P00492	P00492	HPRT1	Hypoxanthine-guanine phosphoribosyltransferase	P00492	HPRT_HUMAN	41788.6	40693.7	41355.8
libDIA	O75533	O75533	SF3B1	Splicing factor 3B subunit 1	O75533	SF3B1_HUMAN	48824.7	43326.2	41761.3			dirDIA	P00505	P00505	GOT2	Aspartate aminotransferase, mitochondrial	P00505	AATM_HUMAN	105903	125723	101830
libDIA	O75534	O75534	CSDE1	Cold shock domain-containing protein E1	O75534	CSDE1_HUMAN	53183.3	51390.4	53438.6			dirDIA	P00558	P00558	PGK1	Phosphoglycerate kinase 1	P00558	PGK1_HUMAN	328594	363485	375859
libDIA	O75569	O75569	PRKRA	Interferon-inducible double-stranded RNA-dependent protein kinase activator A	O75569	PRKRA_HUMAN	2741.81	4805.42	5369.1			dirDIA	P00846	P00846	MT-ATP6	ATP synthase subunit a	P00846	ATP6_HUMAN	2640.78	4657.88	9548.12
libDIA	O75592	O75592	MYCBP2	E3 ubiquitin-protein ligase MYCBP2	O75592	MYCB2_HUMAN	Filtered	2481.82	2492.7			dirDIA	P01008	P01008	SERPINC1	Antithrombin-III	P01008	ANT3_HUMAN	19916.2	16431.1	19265.2
libDIA	O75600	O75600	GCAT	2-amino-3-ketobutyrate coenzyme A ligase, mitochondrial	O75600	KBL_HUMAN	Filtered	6097.82	7627.43			dirDIA	P01111	P01111	NRAS	GTPase NRas	P01111	RASN_HUMAN	21846.7	28823.3	28414.9
libDIA	O75607	O75607	NPM3	Nucleoplasmin-3	O75607	NPM3_HUMAN	34637.6	7542.83	8704.56			dirDIA	P01591	P01591	JCHAIN	Immunoglobulin J chain	P01591	IGJ_HUMAN	76042.9	52750	39595
libDIA	O75608	O75608	LYPLA1	Acyl-protein thioesterase 1	O75608	LYPA1_HUMAN	63424.2	46129.9	47015.6			dirDIA	P01625	P01625		Ig kappa chain V-IV region Len	P01625	KV402_HUMAN	100295	118717	93285
libDIA	O75616	O75616	ERAL1	GTPase Era, mitochondrial	O75616	ERAL1_HUMAN	16775.3	19104.4	18139.9			dirDIA	P01834	P01834	IGKC	Ig kappa chain C region	P01834	IGKC_HUMAN	70617.3	85761.2	75509.2
libDIA	O75643	O75643	SNRNP200	U5 small nuclear ribonucleoprotein 200 kDa helicase	O75643	U520_HUMAN	36110.4	54906.1	56559.2			dirDIA	P01857	P01857	IGHG1	Ig gamma-1 chain C region	P01857	IGHG1_HUMAN	36564.4	61956.9	38270.8
libDIA	O75663	O75663	TIPRL	TIP41-like protein	O75663	TIPRL_HUMAN	Filtered	2763.11	2237.16			dirDIA	P01871	P01871	IGHM	Ig mu chain C region	P01871	IGHM_HUMAN	409271	450557	393003
libDIA	O75665	O75665	OFD1	Oral-facial-digital syndrome 1 protein	O75665	OFD1_HUMAN	36526.5	40017.7	16305.3			dirDIA	P01876	P01876	IGHA1	Ig alpha-1 chain C region	P01876	IGHA1_HUMAN	42171.7	38653.5	25264.5
libDIA	O75683	O75683	SURF6	Surfeit locus protein 6	O75683	SURF6_HUMAN	24648.9	27413.7	25214.2			dirDIA	P01880	P01880	IGHD	Ig delta chain C region	P01880	IGHD_HUMAN	8079.91	8470.13	7358.1
libDIA	O75688	O75688	PPM1B	Protein phosphatase 1B	O75688	PPM1B_HUMAN	Filtered	1547.5	2090.75			dirDIA	P01903	P01903	HLA-DRA	HLA class II histocompatibility antigen, DR alpha chain	P01903	DRA_HUMAN	115157	162477	174037
libDIA	O75691	O75691	UTP20	Small subunit processome component 20 homolog	O75691	UTP20_HUMAN	9722.43	14504.6	12700.1			dirDIA	P01909	P01909	HLA-DQA1	HLA class II histocompatibility antigen, DQ alpha 1 chain	P01909	DQA1_HUMAN	24178.2	13000.4	10880.9
libDIA	O75694	O75694	NUP155	Nuclear pore complex protein Nup155	O75694	NU155_HUMAN	17624.5	17771.7	22326.5			dirDIA	P01911	P01911	HLA-DRB1	HLA class II histocompatibility antigen, DRB1-15 beta chain	P01911	2B1F_HUMAN	382650	361516	343076
libDIA	O75717	O75717	WDHD1	WD repeat and HMG-box DNA-binding protein 1	O75717	WDHD1_HUMAN	10421.3	13347.7	12014.2			dirDIA	P01920	P01920	HLA-DQB1	HLA class II histocompatibility antigen, DQ beta 1 chain	P01920	DQB1_HUMAN	133440	114720	127340
libDIA	O75746	O75746	SLC25A12	Calcium-binding mitochondrial carrier protein Aralar1	O75746	CMC1_HUMAN	13559.7	14563	12941.8			dirDIA	P02042;P02100;P68871;P69891;P69892	P02042;P02100;P68871;P69891;P69892	HBD;HBE1;HBB;HBG1;HBG2	Hemoglobin subunit delta;Hemoglobin subunit epsilon;Hemoglobin subunit beta;Hemoglobin subunit gamma-1;Hemoglobin subunit gamma-2	P02042;P02100;P68871;P69891;P69892	HBD_HUMAN;HBE_HUMAN;HBB_HUMAN;HBG1_HUMAN;HBG2_HUMAN	5435	7688.14	22447.1
libDIA	O75791	O75791	GRAP2	GRB2-related adapter protein 2	O75791	GRAP2_HUMAN	29087.1	31403.3	33515.9			dirDIA	P02533	P02533	KRT14	Keratin, type I cytoskeletal 14	P02533	K1C14_HUMAN	704552	33289.3	77890.7
libDIA	O75792	O75792	RNASEH2A	Ribonuclease H2 subunit A	O75792	RNH2A_HUMAN	Filtered	6608.39	6222.96			dirDIA	P02538;P48668	P02538;P48668	KRT6A;KRT6C	Keratin, type II cytoskeletal 6A;Keratin, type II cytoskeletal 6C	P02538;P48668	K2C6A_HUMAN;K2C6C_HUMAN	327324	24307.2	55139.1
libDIA	O75794	O75794	CDC123	Cell division cycle protein 123 homolog	O75794	CD123_HUMAN	12025	17370.1	16822.1			dirDIA	P02545	P02545	LMNA	Prelamin-A/C	P02545	LMNA_HUMAN	180645	178523	168544
libDIA	O75821	O75821	EIF3G	Eukaryotic translation initiation factor 3 subunit G	O75821	EIF3G_HUMAN	144263	112415	112406			dirDIA	P02768	P02768	ALB	Serum albumin	P02768	ALBU_HUMAN	70146072	16498354	13703850
libDIA	O75822	O75822	EIF3J	Eukaryotic translation initiation factor 3 subunit J	O75822	EIF3J_HUMAN	65714.3	44485.6	51055			dirDIA	P02786	P02786	TFRC	Transferrin receptor protein 1	P02786	TFR1_HUMAN	140314	114697	111941
libDIA	O75832	O75832	PSMD10	26S proteasome non-ATPase regulatory subunit 10	O75832	PSD10_HUMAN	Filtered	5800.6	4740.23			dirDIA	P03905	P03905	MT-ND4	NADH-ubiquinone oxidoreductase chain 4	P03905	NU4M_HUMAN	2206.1	7395.66	8149.91
libDIA	O75844	O75844	ZMPSTE24	CAAX prenyl protease 1 homolog	O75844	FACE1_HUMAN	10156.3	12492	16955.5			dirDIA	P04040	P04040	CAT	Catalase	P04040	CATA_HUMAN	17647.7	9860.48	11524.5
libDIA	O75874	O75874	IDH1	Isocitrate dehydrogenase [NADP] cytoplasmic	O75874	IDHC_HUMAN	4979.72	11624.3	10494.8			dirDIA	P04049;P15056	P04049;P15056	RAF1;BRAF	RAF proto-oncogene serine/threonine-protein kinase;Serine/threonine-protein kinase B-raf	P04049;P15056	RAF1_HUMAN;BRAF_HUMAN	486.013	1850.46	1967.29
libDIA	O75879	O75879	GATB	Glutamyl-tRNA(Gln) amidotransferase subunit B, mitochondrial	O75879	GATB_HUMAN	Filtered	6537.9	4798.17			dirDIA	P04075	P04075	ALDOA	Fructose-bisphosphate aldolase A	P04075	ALDOA_HUMAN	1.05856e+06	818851	804447
libDIA	O75880	O75880	SCO1	Protein SCO1 homolog, mitochondrial	O75880	SCO1_HUMAN	6993.43	7887.52	6446.53			dirDIA	P04080	P04080	CSTB	Cystatin-B	P04080	CYTB_HUMAN	34771.1	36528.9	36233.1
libDIA	O75886	O75886	STAM2	Signal transducing adapter molecule 2	O75886	STAM2_HUMAN	Filtered	3112.76	2698.01			dirDIA	P04114	P04114	APOB	Apolipoprotein B-100	P04114	APOB_HUMAN	2919.91	2941.91	2763.71
libDIA	O75901	O75901	RASSF9	Ras association domain-containing protein 9	O75901	RASF9_HUMAN	6908.72	6910.17	4865.49			dirDIA	P04179	P04179	SOD2	Superoxide dismutase [Mn], mitochondrial	P04179	SODM_HUMAN	6048.28	10754.1	10178
libDIA	O75909	O75909	CCNK	Cyclin-K	O75909	CCNK_HUMAN	Filtered	8721.54	8769.48			dirDIA	P04181	P04181	OAT	Ornithine aminotransferase, mitochondrial	P04181	OAT_HUMAN	21900.4	19688.8	14288
libDIA	O75915	O75915	ARL6IP5	PRA1 family protein 3	O75915	PRAF3_HUMAN	10967.8	9974.74	11193.9			dirDIA	P04183	P04183	TK1	Thymidine kinase, cytosolic	P04183	KITH_HUMAN	7381.25	9534.83	9967.92
libDIA	O75925;O75928	O75925;O75928	PIAS1;PIAS2	E3 SUMO-protein ligase PIAS1;E3 SUMO-protein ligase PIAS2	O75925;O75928	PIAS1_HUMAN;PIAS2_HUMAN	Filtered	5825.71	5445.81			dirDIA	P04233	P04233	CD74	HLA class II histocompatibility antigen gamma chain	P04233	HG2A_HUMAN	86350.4	66915.9	61328.5
libDIA	O75934	O75934	BCAS2	Pre-mRNA-splicing factor SPF27	O75934	SPF27_HUMAN	9653.61	8403.08	9283.25			dirDIA	P04264	P04264	KRT1	Keratin, type II cytoskeletal 1	P04264	K2C1_HUMAN	2.66957e+06	176435	409846
libDIA	O75935	O75935	DCTN3	Dynactin subunit 3	O75935	DCTN3_HUMAN	Filtered	5716.22	5770.45			dirDIA	P04406	P04406	GAPDH	Glyceraldehyde-3-phosphate dehydrogenase	P04406	G3P_HUMAN	3391539	2886647	2.73557e+06
libDIA	O75937	O75937	DNAJC8	DnaJ homolog subfamily C member 8	O75937	DNJC8_HUMAN	65133	52657.3	49968.4			dirDIA	P04440	P04440	HLA-DPB1	HLA class II histocompatibility antigen, DP beta 1 chain	P04440	DPB1_HUMAN	87433.3	80460.2	74851.3
libDIA	O75940	O75940	SMNDC1	Survival of motor neuron-related-splicing factor 30	O75940	SPF30_HUMAN	37747.6	30321.6	27802.6			dirDIA	P04632	P04632	CAPNS1	Calpain small subunit 1	P04632	CPNS1_HUMAN	12172.7	5972.94	7900.93
libDIA	O75947	O75947	ATP5H	ATP synthase subunit d, mitochondrial	O75947	ATP5H_HUMAN	56933	58332.2	54609.6			dirDIA	P04792	P04792	HSPB1	Heat shock protein beta-1	P04792	HSPB1_HUMAN	20437.1	17025.9	23182.2
libDIA	O75955	O75955	FLOT1	Flotillin-1	O75955	FLOT1_HUMAN	14371.6	11550.5	11615.2			dirDIA	P04818	P04818	TYMS	Thymidylate synthase	P04818	TYSY_HUMAN	12176.3	18326	20305.2
libDIA	O75964	O75964	ATP5L	ATP synthase subunit g, mitochondrial	O75964	ATP5L_HUMAN	126704	86100.2	118683			dirDIA	P04843	P04843	RPN1	Dolichyl-diphosphooligosaccharide--protein glycosyltransferase subunit 1	P04843	RPN1_HUMAN	102457	153679	150814
libDIA	O75976	O75976	CPD	Carboxypeptidase D	O75976	CBPD_HUMAN	Filtered	2221.31	27219.1			dirDIA	P04844	P04844	RPN2	Dolichyl-diphosphooligosaccharide--protein glycosyltransferase subunit 2	P04844	RPN2_HUMAN	99757.5	89162.7	97760.1
libDIA	O75995	O75995	SASH3	SAM and SH3 domain-containing protein 3	O75995	SASH3_HUMAN	8289.52	8402.4	9686.87			dirDIA	P04899	P04899	GNAI2	Guanine nucleotide-binding protein G(i) subunit alpha-2	P04899	GNAI2_HUMAN	33823.6	29404	25509.6
libDIA	O76003	O76003	GLRX3	Glutaredoxin-3	O76003	GLRX3_HUMAN	119627	103531	110044			dirDIA	P05023	P05023	ATP1A1	Sodium/potassium-transporting ATPase subunit alpha-1	P05023	AT1A1_HUMAN	83221.4	88399.5	90335.7
libDIA	O76021	O76021	RSL1D1	Ribosomal L1 domain-containing protein 1	O76021	RL1D1_HUMAN	100360	91540.6	84983.2			dirDIA	P05107	P05107	ITGB2	Integrin beta-2	P05107	ITB2_HUMAN	21599.8	24907.7	23206.3
libDIA	O76031	O76031	CLPX	ATP-dependent Clp protease ATP-binding subunit clpX-like, mitochondrial	O76031	CLPX_HUMAN	7718.84	14599.6	12804.1			dirDIA	P05114	P05114	HMGN1	Non-histone chromosomal protein HMG-14	P05114	HMGN1_HUMAN	12928.7	5922.39	11267
libDIA	O76071	O76071	CIAO1	Probable cytosolic iron-sulfur protein assembly protein CIAO1	O76071	CIAO1_HUMAN	5986.66	7866.28	7444.23			dirDIA	P05141	P05141	SLC25A5	ADP/ATP translocase 2	P05141	ADT2_HUMAN	197421	318051	309414
libDIA	O76094	O76094	SRP72	Signal recognition particle subunit SRP72	O76094	SRP72_HUMAN	18420.8	16674.4	15106.4			dirDIA	P05161	P05161	ISG15	Ubiquitin-like protein ISG15	P05161	ISG15_HUMAN	42061.4	42319.9	35494.2
libDIA	O94763	O94763	URI1	Unconventional prefoldin RPB5 interactor 1	O94763	RMP_HUMAN	Filtered	3938.69	4319.17			dirDIA	P05198	P05198	EIF2S1	Eukaryotic translation initiation factor 2 subunit 1	P05198	IF2A_HUMAN	155093	117488	115344
libDIA	O94766	O94766	B3GAT3	Galactosylgalactosylxylosylprotein 3-beta-glucuronosyltransferase 3	O94766	B3GA3_HUMAN	5253.22	8775.69	6404.15			dirDIA	P05204	P05204	HMGN2	Non-histone chromosomal protein HMG-17	P05204	HMGN2_HUMAN	22975.6	9547.92	503.115
libDIA	O94768	O94768	STK17B	Serine/threonine-protein kinase 17B	O94768	ST17B_HUMAN	Filtered	1132.28	2356.6			dirDIA	P05362	P05362	ICAM1	Intercellular adhesion molecule 1	P05362	ICAM1_HUMAN	13830.6	16986	15900.5
libDIA	O94776	O94776	MTA2	Metastasis-associated protein MTA2	O94776	MTA2_HUMAN	50623.7	45395.1	44264.8			dirDIA	P05387	P05387	RPLP2	60S acidic ribosomal protein P2	P05387	RLA2_HUMAN	638198	497462	449909
libDIA	O94804	O94804	STK10	Serine/threonine-protein kinase 10	O94804	STK10_HUMAN	4199.86	6438.82	7444.7			dirDIA	P05388	P05388	RPLP0	60S acidic ribosomal protein P0	P05388	RLA0_HUMAN	186154	184566	193933
libDIA	O94826	O94826	TOMM70A	Mitochondrial import receptor subunit TOM70	O94826	TOM70_HUMAN	32529.7	37453	34878.8			dirDIA	P05455	P05455	SSB	Lupus La protein	P05455	LA_HUMAN	25011	13640.2	9323.2
libDIA	O94829	O94829	IPO13	Importin-13	O94829	IPO13_HUMAN	Filtered	504.548	Filtered			dirDIA	P05771;P17252	P05771;P17252	PRKCB;PRKCA	Protein kinase C beta type;Protein kinase C alpha type	P05771;P17252	KPCB_HUMAN;KPCA_HUMAN	2332.05	3302.75	2886.33
libDIA	O94842	O94842	TOX4	TOX high mobility group box family member 4	O94842	TOX4_HUMAN	Filtered	3628.52	3474.1			dirDIA	P06132	P06132	UROD	Uroporphyrinogen decarboxylase	P06132	DCUP_HUMAN	19051.9	23745.6	24384.3
libDIA	O94874	O94874	UFL1	E3 UFM1-protein ligase 1	O94874	UFL1_HUMAN	10918.8	9697.48	10331			dirDIA	P06239	P06239	LCK	Tyrosine-protein kinase Lck	P06239	LCK_HUMAN	4935.18	5670.82	5226.99
libDIA	O94880	O94880	PHF14	PHD finger protein 14	O94880	PHF14_HUMAN	Filtered	1153.53	1185.98			dirDIA	P06276	P06276	BCHE	Cholinesterase	P06276	CHLE_HUMAN	9830.58	9253.74	9820.56
libDIA	O94888	O94888	UBXN7	UBX domain-containing protein 7	O94888	UBXN7_HUMAN	9672.12	7868.81	8157.83			dirDIA	P06312;P06313	P06312;P06313	IGKV4-1;	Ig kappa chain V-IV region (Fragment);Ig kappa chain V-IV region JI	P06312;P06313	KV401_HUMAN;KV403_HUMAN	71803.4	35213.9	10571.9
libDIA	O94901	O94901	SUN1	SUN domain-containing protein 1	O94901	SUN1_HUMAN	5341.26	7198.21	8387.88			dirDIA	P06454	P06454	PTMA	Prothymosin alpha	P06454	PTMA_HUMAN	334876	59153.8	14037.2
libDIA	O94903	O94903	PROSC	Proline synthase co-transcribed bacterial homolog protein	O94903	PROSC_HUMAN	26964.2	20277	24935.6			dirDIA	P06493	P06493	CDK1	Cyclin-dependent kinase 1	P06493	CDK1_HUMAN	146424	101520	111027
libDIA	O94905	O94905	ERLIN2	Erlin-2	O94905	ERLN2_HUMAN	30630	26522.8	13588.9			dirDIA	P06576	P06576	ATP5B	ATP synthase subunit beta, mitochondrial	P06576	ATPB_HUMAN	758985	666721	643004
libDIA	O94906	O94906	PRPF6	Pre-mRNA-processing factor 6	O94906	PRP6_HUMAN	34361.8	35126.3	34340			dirDIA	P06702	P06702	S100A9	Protein S100-A9	P06702	S10A9_HUMAN	13155.2	616.112	4676.03
libDIA	O94913	O94913	PCF11	Pre-mRNA cleavage complex 2 protein Pcf11	O94913	PCF11_HUMAN	7805.28	4436.8	5700.29			dirDIA	P06730	P06730	EIF4E	Eukaryotic translation initiation factor 4E	P06730	IF4E_HUMAN	14913.9	10107.5	22113.4
libDIA	O94915	O94915	FRYL	Protein furry homolog-like	O94915	FRYL_HUMAN	3490.53	2923.78	3541.91			dirDIA	P06733	P06733	ENO1	Alpha-enolase	P06733	ENOA_HUMAN	959048	896565	991954
libDIA	O94919	O94919	ENDOD1	Endonuclease domain-containing 1 protein	O94919	ENDD1_HUMAN	Filtered	3315.67	2230.3			dirDIA	P06734	P06734	FCER2	Low affinity immunoglobulin epsilon Fc receptor	P06734	FCER2_HUMAN	52975.4	35566.9	32694.7
libDIA	O94921	O94921	CDK14	Cyclin-dependent kinase 14	O94921	CDK14_HUMAN	Filtered	3011.63	2298.76			dirDIA	P06744	P06744	GPI	Glucose-6-phosphate isomerase	P06744	G6PI_HUMAN	174070	87280.2	87106.3
libDIA	O94925	O94925	GLS	Glutaminase kidney isoform, mitochondrial	O94925	GLSK_HUMAN	42524.3	44220.8	46253.9			dirDIA	P06748	P06748	NPM1	Nucleophosmin	P06748	NPM_HUMAN	805222	686172	745012
libDIA	O94953	O94953	KDM4B	Lysine-specific demethylase 4B	O94953	KDM4B_HUMAN	1789.84	4298.41	3589.49			dirDIA	P06753	P06753	TPM3	Tropomyosin alpha-3 chain	P06753	TPM3_HUMAN	221020	146997	152238
libDIA	O94966	O94966	USP19	Ubiquitin carboxyl-terminal hydrolase 19	O94966	UBP19_HUMAN	3739	3998.56	4808.07			dirDIA	P06865	P06865	HEXA	Beta-hexosaminidase subunit alpha	P06865	HEXA_HUMAN	11101.3	11456.1	11848.9
libDIA	O94979	O94979	SEC31A	Protein transport protein Sec31A	O94979	SC31A_HUMAN	29278.1	34877.8	31293			dirDIA	P06899;P23527;P33778;Q16778	P06899;P23527;P33778;Q16778	HIST1H2BJ;HIST1H2BO;HIST1H2BB;HIST2H2BE	Histone H2B type 1-J;Histone H2B type 1-O;Histone H2B type 1-B;Histone H2B type 2-E	P06899;P23527;P33778;Q16778	H2B1J_HUMAN;H2B1O_HUMAN;H2B1B_HUMAN;H2B2E_HUMAN	8487894	903884	5892357
libDIA	O94992	O94992	HEXIM1	Protein HEXIM1	O94992	HEXI1_HUMAN	9919.44	12553.2	12725.4			dirDIA	P07108	P07108	DBI	Acyl-CoA-binding protein	P07108	ACBP_HUMAN	19656.2	17340.7	16659.2
libDIA	O95067	O95067	CCNB2	G2/mitotic-specific cyclin-B2	O95067	CCNB2_HUMAN	Filtered	6214.75	5336.12			dirDIA	P07195	P07195	LDHB	L-lactate dehydrogenase B chain	P07195	LDHB_HUMAN	1.12445e+06	1.11188e+06	1.12747e+06
libDIA	O95070	O95070	YIF1A	Protein YIF1A	O95070	YIF1A_HUMAN	5204.3	3422.32	4685.65			dirDIA	P07203	P07203	GPX1	Glutathione peroxidase 1	P07203	GPX1_HUMAN	29212.1	35968.7	34253.3
libDIA	O95071	O95071	UBR5	E3 ubiquitin-protein ligase UBR5	O95071	UBR5_HUMAN	5601.77	10098.8	9521.58			dirDIA	P07237	P07237	P4HB	Protein disulfide-isomerase	P07237	PDIA1_HUMAN	227396	131041	123172
libDIA	O95081	O95081	AGFG2	Arf-GAP domain and FG repeat-containing protein 2	O95081	AGFG2_HUMAN	Filtered	3738.38	4619.8			dirDIA	P07311	P07311	ACYP1	Acylphosphatase-1	P07311	ACYP1_HUMAN	5122	5454.01	5664.74
libDIA	O95104	O95104	SCAF4	Splicing factor, arginine/serine-rich 15	O95104	SFR15_HUMAN	15893.4	17257.6	18991.1			dirDIA	P07339	P07339	CTSD	Cathepsin D	P07339	CATD_HUMAN	11904.6	9985.62	11212
libDIA	O95155	O95155	UBE4B	Ubiquitin conjugation factor E4 B	O95155	UBE4B_HUMAN	Filtered	1432.32	1765.05			dirDIA	P07355	P07355	ANXA2	Annexin A2	P07355	ANXA2_HUMAN	56682.3	58575.1	56895.3
libDIA	O95163	O95163	IKBKAP	Elongator complex protein 1	O95163	ELP1_HUMAN	6490.1	6421.28	7385.66			dirDIA	P07384	P07384	CAPN1	Calpain-1 catalytic subunit	P07384	CAN1_HUMAN	27812.8	32979.8	28353.4
libDIA	O95167	O95167	NDUFA3	NADH dehydrogenase [ubiquinone] 1 alpha subcomplex subunit 3	O95167	NDUA3_HUMAN	23536.1	22003.8	19399			dirDIA	P07437	P07437	TUBB	Tubulin beta chain	P07437	TBB5_HUMAN	1.25444e+06	1.27776e+06	1.24904e+06
libDIA	O95168	O95168	NDUFB4	NADH dehydrogenase [ubiquinone] 1 beta subcomplex subunit 4	O95168	NDUB4_HUMAN	38364.3	25891.1	23392.2			dirDIA	P07477;P07478;Q8NHM4	P07477;P07478;Q8NHM4	PRSS1;PRSS2;PRSS3P2	Trypsin-1;Trypsin-2;Putative trypsin-6	P07477;P07478;Q8NHM4	TRY1_HUMAN;TRY2_HUMAN;TRY6_HUMAN	5207.2	8408.96	12036
libDIA	O95169	O95169	NDUFB8	NADH dehydrogenase [ubiquinone] 1 beta subcomplex subunit 8, mitochondrial	O95169	NDUB8_HUMAN	53558.2	17727.3	22617.9			dirDIA	P07602	P07602	PSAP	Prosaposin	P07602	SAP_HUMAN	Filtered	5110.34	5547.5
libDIA	O95182	O95182	NDUFA7	NADH dehydrogenase [ubiquinone] 1 alpha subcomplex subunit 7	O95182	NDUA7_HUMAN	8563.68	6166.23	7582.33			dirDIA	P07737	P07737	PFN1	Profilin-1	P07737	PROF1_HUMAN	516831	561892	534964
libDIA	O95202	O95202	LETM1	LETM1 and EF-hand domain-containing protein 1, mitochondrial	O95202	LETM1_HUMAN	17301.4	23873.8	18979.1			dirDIA	P07741	P07741	APRT	Adenine phosphoribosyltransferase	P07741	APT_HUMAN	130180	114634	108842
libDIA	O95218	O95218	ZRANB2	Zinc finger Ran-binding domain-containing protein 2	O95218	ZRAB2_HUMAN	13234.8	8316.51	8977.52			dirDIA	P07814	P07814	EPRS	Bifunctional glutamate/proline--tRNA ligase	P07814	SYEP_HUMAN	75182.8	58886.3	49668.2
libDIA	O95229	O95229	ZWINT	ZW10 interactor	O95229	ZWINT_HUMAN	14310	11650.6	10765			dirDIA	P07900	P07900	HSP90AA1	Heat shock protein HSP 90-alpha	P07900	HS90A_HUMAN	667091	456642	488520
libDIA	O95232	O95232	LUC7L3	Luc7-like protein 3	O95232	LC7L3_HUMAN	3959.58	8459.91	6873.88			dirDIA	P07910	P07910	HNRNPC	Heterogeneous nuclear ribonucleoproteins C1/C2	P07910	HNRPC_HUMAN	1200848	940738	1.07708e+06
libDIA	O95239	O95239	KIF4A	Chromosome-associated kinesin KIF4A	O95239	KIF4A_HUMAN	1717.52	3861.8	3605.51			dirDIA	P07948	P07948	LYN	Tyrosine-protein kinase Lyn	P07948	LYN_HUMAN	8882.21	5753.3	3193.48
libDIA	O95249	O95249	GOSR1	Golgi SNAP receptor complex member 1	O95249	GOSR1_HUMAN	Filtered	3889.34	3758.57			dirDIA	P07954	P07954	FH	Fumarate hydratase, mitochondrial	P07954	FUMH_HUMAN	115095	90822.2	89467.8
libDIA	O95273	O95273	CCNDBP1	Cyclin-D1-binding protein 1	O95273	CCDB1_HUMAN	Filtered	1070.38	1313.43			dirDIA	P08133	P08133	ANXA6	Annexin A6	P08133	ANXA6_HUMAN	259312	327486	328005
libDIA	O95292	O95292	VAPB	Vesicle-associated membrane protein-associated protein B/C	O95292	VAPB_HUMAN	2504.46	7023.93	7548.16			dirDIA	P08134;P61586	P08134;P61586	RHOC;RHOA	Rho-related GTP-binding protein RhoC;Transforming protein RhoA	P08134;P61586	RHOC_HUMAN;RHOA_HUMAN	19643	9276.92	8727.13
libDIA	O95295	O95295	SNAPIN	SNARE-associated protein Snapin	O95295	SNAPN_HUMAN	6492.26	7518.09	8038.45			dirDIA	P08195	P08195	SLC3A2	4F2 cell-surface antigen heavy chain	P08195	4F2_HUMAN	71078.8	86745.2	85388.3
libDIA	O95298	O95298	NDUFC2	NADH dehydrogenase [ubiquinone] 1 subunit C2	O95298	NDUC2_HUMAN	26981.3	22890.7	20028.3			dirDIA	P08237	P08237	PFKM	ATP-dependent 6-phosphofructokinase, muscle type	P08237	PFKAM_HUMAN	8642.25	11496.4	11667.5
libDIA	O95299	O95299	NDUFA10	NADH dehydrogenase [ubiquinone] 1 alpha subcomplex subunit 10, mitochondrial	O95299	NDUAA_HUMAN	12931.8	10993.9	10067.1			dirDIA	P08238	P08238	HSP90AB1	Heat shock protein HSP 90-beta	P08238	HS90B_HUMAN	2.42984e+06	2.33466e+06	2243315
libDIA	O95319	O95319	CELF2	CUGBP Elav-like family member 2	O95319	CELF2_HUMAN	11785.7	8717	7223.71			dirDIA	P08240	P08240	SRPR	Signal recognition particle receptor subunit alpha	P08240	SRPR_HUMAN	6163.47	9732.76	9544.88
libDIA	O95336	O95336	PGLS	6-phosphogluconolactonase	O95336	6PGL_HUMAN	67444.5	55014.2	54972.1			dirDIA	P08243	P08243	ASNS	Asparagine synthetase [glutamine-hydrolyzing]	P08243	ASNS_HUMAN	15633.6	19559.6	22913.7
libDIA	O95347	O95347	SMC2	Structural maintenance of chromosomes protein 2	O95347	SMC2_HUMAN	75007.7	62250.4	70153.5			dirDIA	P08397	P08397	HMBS	Porphobilinogen deaminase	P08397	HEM3_HUMAN	9811.98	7525.49	5959.65
libDIA	O95352	O95352	ATG7	Ubiquitin-like modifier-activating enzyme ATG7	O95352	ATG7_HUMAN	Filtered	468.492	1137.89			dirDIA	P08559	P08559	PDHA1	Pyruvate dehydrogenase E1 component subunit alpha, somatic form, mitochondrial	P08559	ODPA_HUMAN	26782.5	42062	31508.1
libDIA	O95363	O95363	FARS2	Phenylalanine--tRNA ligase, mitochondrial	O95363	SYFM_HUMAN	Filtered	6282.59	4511.79			dirDIA	P08567	P08567	PLEK	Pleckstrin	P08567	PLEK_HUMAN	Filtered	2468.11	4075.27
libDIA	O95372	O95372	LYPLA2	Acyl-protein thioesterase 2	O95372	LYPA2_HUMAN	6752.59	5761.52	5313.95			dirDIA	P08574	P08574	CYC1	Cytochrome c1, heme protein, mitochondrial	P08574	CY1_HUMAN	6956.94	21048.9	22091.3
libDIA	O95373	O95373	IPO7	Importin-7	O95373	IPO7_HUMAN	16497.3	18588.4	11529.3			dirDIA	P08575	P08575	PTPRC	Receptor-type tyrosine-protein phosphatase C	P08575	PTPRC_HUMAN	105411	55460.6	49364.3
libDIA	O95376	O95376	ARIH2	E3 ubiquitin-protein ligase ARIH2	O95376	ARI2_HUMAN	4827.09	4253.9	3276.25			dirDIA	P08579	P08579	SNRPB2	U2 small nuclear ribonucleoprotein B''	P08579	RU2B_HUMAN	33133.6	28684.5	25577
libDIA	O95379	O95379	TNFAIP8	Tumor necrosis factor alpha-induced protein 8	O95379	TFIP8_HUMAN	7035.99	7806.62	8851.51			dirDIA	P08621	P08621	SNRNP70	U1 small nuclear ribonucleoprotein 70 kDa	P08621	RU17_HUMAN	97384.2	113024	105119
libDIA	O95391	O95391	SLU7	Pre-mRNA-splicing factor SLU7	O95391	SLU7_HUMAN	Filtered	3087.48	1120.4			dirDIA	P08670	P08670	VIM	Vimentin	P08670	VIME_HUMAN	14849.2	16025.2	20720.1
libDIA	O95394	O95394	PGM3	Phosphoacetylglucosamine mutase	O95394	AGM1_HUMAN	6413.15	5681.68	5469.53			dirDIA	P08708	P08708	RPS17	40S ribosomal protein S17	P08708	RS17_HUMAN	21002.5	9627.32	12132
libDIA	O95400	O95400	CD2BP2	CD2 antigen cytoplasmic tail-binding protein 2	O95400	CD2B2_HUMAN	30490.4	33926.4	21852			dirDIA	P08758	P08758	ANXA5	Annexin A5	P08758	ANXA5_HUMAN	102347	113030	101346
libDIA	O95433	O95433	AHSA1	Activator of 90 kDa heat shock protein ATPase homolog 1	O95433	AHSA1_HUMAN	67436.6	69720.6	63249.9			dirDIA	P08779	P08779	KRT16	Keratin, type I cytoskeletal 16	P08779	K1C16_HUMAN	18604.2	1	1
libDIA	O95453	O95453	PARN	Poly(A)-specific ribonuclease PARN	O95453	PARN_HUMAN	5014.96	5671.47	5149.5			dirDIA	P08865	P08865	RPSA	40S ribosomal protein SA	P08865	RSSA_HUMAN	485768	318640	378992
libDIA	O95456	O95456	PSMG1	Proteasome assembly chaperone 1	O95456	PSMG1_HUMAN	10793.8	17198.9	9258.06			dirDIA	P09001	P09001	MRPL3	39S ribosomal protein L3, mitochondrial	P09001	RM03_HUMAN	11695.3	19124	18336
libDIA	O95466	O95466	FMNL1	Formin-like protein 1	O95466	FMNL1_HUMAN	300962	58693.8	38481.2			dirDIA	P09012	P09012	SNRPA	U1 small nuclear ribonucleoprotein A	P09012	SNRPA_HUMAN	49515.8	39377	32254.6
libDIA	O95470	O95470	SGPL1	Sphingosine-1-phosphate lyase 1	O95470	SGPL1_HUMAN	Filtered	Filtered	1076.1			dirDIA	P09086	P09086	POU2F2	POU domain, class 2, transcription factor 2	P09086	PO2F2_HUMAN	4163.92	4485.1	3004.72
libDIA	O95478	O95478	NSA2	Ribosome biogenesis protein NSA2 homolog	O95478	NSA2_HUMAN	42137.3	19590.9	16853.9			dirDIA	P09104	P09104	ENO2	Gamma-enolase	P09104	ENOG_HUMAN	13925.6	13645.3	13747.4
libDIA	O95486	O95486	SEC24A	Protein transport protein Sec24A	O95486	SC24A_HUMAN	18273.6	12063.5	13864.1			dirDIA	P09110	P09110	ACAA1	3-ketoacyl-CoA thiolase, peroxisomal	P09110	THIK_HUMAN	Filtered	2617.59	1614.57
libDIA	O95551	O95551	TDP2	Tyrosyl-DNA phosphodiesterase 2	O95551	TYDP2_HUMAN	Filtered	9413.42	7574.57			dirDIA	P09132	P09132	SRP19	Signal recognition particle 19 kDa protein	P09132	SRP19_HUMAN	7690.26	8788.52	8341.08
libDIA	O95571	O95571	ETHE1	Persulfide dioxygenase ETHE1, mitochondrial	O95571	ETHE1_HUMAN	12521.2	10224.6	10136			dirDIA	P09211	P09211	GSTP1	Glutathione S-transferase P	P09211	GSTP1_HUMAN	95587.7	162752	182513
libDIA	O95573	O95573	ACSL3	Long-chain-fatty-acid--CoA ligase 3	O95573	ACSL3_HUMAN	8986.5	9644.04	9259.28			dirDIA	P09326	P09326	CD48	CD48 antigen	P09326	CD48_HUMAN	47918.8	44136.9	38609.2
libDIA	O95602	O95602	POLR1A	DNA-directed RNA polymerase I subunit RPA1	O95602	RPA1_HUMAN	6355.71	6920.31	5817.51			dirDIA	P09382	P09382	LGALS1	Galectin-1	P09382	LEG1_HUMAN	124344	61704.7	68864
libDIA	O95619	O95619	YEATS4	YEATS domain-containing protein 4	O95619	YETS4_HUMAN	Filtered	2954.57	3297.38			dirDIA	P09417	P09417	QDPR	Dihydropteridine reductase	P09417	DHPR_HUMAN	7690.66	15171.4	15223.5
libDIA	O95630	O95630	STAMBP	STAM-binding protein	O95630	STABP_HUMAN	1358.75	5946.62	7015.67			dirDIA	P09429	P09429	HMGB1	High mobility group protein B1	P09429	HMGB1_HUMAN	168341	137912	137856
libDIA	O95639	O95639	CPSF4	Cleavage and polyadenylation specificity factor subunit 4	O95639	CPSF4_HUMAN	Filtered	2005.7	2119.98			dirDIA	P09496	P09496	CLTA	Clathrin light chain A	P09496	CLCA_HUMAN	72168.3	27080.1	24329.3
libDIA	O95671	O95671	ASMTL	N-acetylserotonin O-methyltransferase-like protein	O95671	ASML_HUMAN	9150.53	5761.81	5116.36			dirDIA	P09525	P09525	ANXA4	Annexin A4	P09525	ANXA4_HUMAN	10378.8	10716.6	9990
libDIA	O95674	O95674	CDS2	Phosphatidate cytidylyltransferase 2	O95674	CDS2_HUMAN	Filtered	1630.57	446.216			dirDIA	P09543	P09543	CNP	2',3'-cyclic-nucleotide 3'-phosphodiesterase	P09543	CN37_HUMAN	7752.41	12963.3	11782.3
libDIA	O95707	O95707	POP4	Ribonuclease P protein subunit p29	O95707	RPP29_HUMAN	Filtered	4307.52	4298.39			dirDIA	P09601	P09601	HMOX1	Heme oxygenase 1	P09601	HMOX1_HUMAN	7870.07	9448.31	8029.57
libDIA	O95721	O95721	SNAP29	Synaptosomal-associated protein 29	O95721	SNP29_HUMAN	14502.8	6822.64	5935.24			dirDIA	P09622	P09622	DLD	Dihydrolipoyl dehydrogenase, mitochondrial	P09622	DLDH_HUMAN	39008.8	51646.1	66869.4
libDIA	O95747	O95747	OXSR1	Serine/threonine-protein kinase OSR1	O95747	OXSR1_HUMAN	25552	25200.4	25292.1			dirDIA	P09651	P09651	HNRNPA1	Heterogeneous nuclear ribonucleoprotein A1	P09651	ROA1_HUMAN	537733	601682	642067
libDIA	O95757	O95757	HSPA4L	Heat shock 70 kDa protein 4L	O95757	HS74L_HUMAN	24370.4	30085.5	27787.9			dirDIA	P09661	P09661	SNRPA1	U2 small nuclear ribonucleoprotein A'	P09661	RU2A_HUMAN	104452	68210.9	58483.7
libDIA	O95758	O95758	PTBP3	Polypyrimidine tract-binding protein 3	O95758	PTBP3_HUMAN	9227.16	5163.89	6883.3			dirDIA	P09668	P09668	CTSH	Pro-cathepsin H	P09668	CATH_HUMAN	29090.3	19006.6	17169.3
libDIA	O95772	O95772	STARD3NL	MLN64 N-terminal domain homolog	O95772	MENTO_HUMAN	39797.5	15980.8	12827.5			dirDIA	P09669	P09669	COX6C	Cytochrome c oxidase subunit 6C	P09669	COX6C_HUMAN	91570	89287.7	85231.4
libDIA	O95777	O95777	LSM8	U6 snRNA-associated Sm-like protein LSm8	O95777	LSM8_HUMAN	24347.4	10569.4	11032.6			dirDIA	P09874	P09874	PARP1	Poly [ADP-ribose] polymerase 1	P09874	PARP1_HUMAN	190724	163237	184039
libDIA	O95782	O95782	AP2A1	AP-2 complex subunit alpha-1	O95782	AP2A1_HUMAN	12440.2	13860.1	14417.4			dirDIA	P09960	P09960	LTA4H	Leukotriene A-4 hydrolase	P09960	LKHA4_HUMAN	7331.04	9117.12	8156.33
libDIA	O95785	O95785	WIZ	Protein Wiz	O95785	WIZ_HUMAN	Filtered	1457.35	1766.61			dirDIA	P09972	P09972	ALDOC	Fructose-bisphosphate aldolase C	P09972	ALDOC_HUMAN	44292.7	35322.4	26837.3
libDIA	O95793	O95793	STAU1	Double-stranded RNA-binding protein Staufen homolog 1	O95793	STAU1_HUMAN	27383.3	22961.6	21658.1			dirDIA	P0C0S5;Q71UI9	P0C0S5;Q71UI9	H2AFZ;H2AFV	Histone H2A.Z;Histone H2A.V	P0C0S5;Q71UI9	H2AZ_HUMAN;H2AV_HUMAN	454525	481002	400720
libDIA	O95801	O95801	TTC4	Tetratricopeptide repeat protein 4	O95801	TTC4_HUMAN	7913.13	7935.23	9779.23			dirDIA	P0CG22;Q9BTZ2	P0CG22;Q9BTZ2	DHRS4L1;DHRS4	Putative dehydrogenase/reductase SDR family member 4-like 1;Dehydrogenase/reductase SDR family member 4	P0CG22;Q9BTZ2	DR4L1_HUMAN;DHRS4_HUMAN	4462.14	6819.74	5992.24
libDIA	O95816	O95816	BAG2	BAG family molecular chaperone regulator 2	O95816	BAG2_HUMAN	16932.9	18888.7	20278.6			dirDIA	P0CG47;P0CG48;P62979;P62987	P0CG47;P0CG48;P62979;P62987	UBB;UBC;RPS27A;UBA52	Polyubiquitin-B;Polyubiquitin-C;Ubiquitin-40S ribosomal protein S27a;Ubiquitin-60S ribosomal protein L40	P0CG47;P0CG48;P62979;P62987	UBB_HUMAN;UBC_HUMAN;RS27A_HUMAN;RL40_HUMAN	825220	665507	666032
libDIA	O95817	O95817	BAG3	BAG family molecular chaperone regulator 3	O95817	BAG3_HUMAN	Filtered	5001.13	5101.81			dirDIA	P0DMV8;P0DMV9	P0DMV8;P0DMV9	HSPA1A;HSPA1B	Heat shock 70 kDa protein 1A;Heat shock 70 kDa protein 1B	P0DMV8;P0DMV9	HS71A_HUMAN;HS71B_HUMAN	436298	371972	338201
libDIA	O95825	O95825	CRYZL1	Quinone oxidoreductase-like protein 1	O95825	QORL1_HUMAN	Filtered	6452.35	Filtered			dirDIA	P10114;P61225;Q9Y3L5	P10114;P61225;Q9Y3L5	RAP2A;RAP2B;RAP2C	Ras-related protein Rap-2a;Ras-related protein Rap-2b;Ras-related protein Rap-2c	P10114;P61225;Q9Y3L5	RAP2A_HUMAN;RAP2B_HUMAN;RAP2C_HUMAN	14986.2	15131.6	14998
libDIA	O95831	O95831	AIFM1	Apoptosis-inducing factor 1, mitochondrial	O95831	AIFM1_HUMAN	40345.9	38707.1	39157			dirDIA	P10155	P10155	TROVE2	60 kDa SS-A/Ro ribonucleoprotein	P10155	RO60_HUMAN	11119.8	16927.3	16811.3
libDIA	O95834	O95834	EML2	Echinoderm microtubule-associated protein-like 2	O95834	EMAL2_HUMAN	5254.47	6115.68	6068.7			dirDIA	P10515	P10515	DLAT	Dihydrolipoyllysine-residue acetyltransferase component of pyruvate dehydrogenase complex, mitochondrial	P10515	ODP2_HUMAN	14406.8	14181.7	15654.7
libDIA	O95861	O95861	BPNT1	3'(2'),5'-bisphosphate nucleotidase 1	O95861	BPNT1_HUMAN	37332.9	39322.7	33018.3			dirDIA	P10599	P10599	TXN	Thioredoxin	P10599	THIO_HUMAN	551923	336866	296793
libDIA	O95864	O95864	FADS2	Fatty acid desaturase 2	O95864	FADS2_HUMAN	8936.56	14698	14854.1			dirDIA	P10606	P10606	COX5B	Cytochrome c oxidase subunit 5B, mitochondrial	P10606	COX5B_HUMAN	98703.4	82496.7	67073.3
libDIA	O95881	O95881	TXNDC12	Thioredoxin domain-containing protein 12	O95881	TXD12_HUMAN	35683.3	31700.6	30253.1			dirDIA	P10644	P10644	PRKAR1A	cAMP-dependent protein kinase type I-alpha regulatory subunit	P10644	KAP0_HUMAN	18771.6	15861.7	20817
libDIA	O95900	O95900	TRUB2	Probable tRNA pseudouridine synthase 2	O95900	TRUB2_HUMAN	Filtered	3637.41	3152.12			dirDIA	P10768	P10768	ESD	S-formylglutathione hydrolase	P10768	ESTD_HUMAN	41311	32160.3	35351.2
libDIA	O95905	O95905	ECD	Protein ecdysoneless homolog	O95905	ECD_HUMAN	8169.82	5227.76	4810.39			dirDIA	P10809	P10809	HSPD1	60 kDa heat shock protein, mitochondrial	P10809	CH60_HUMAN	587803	549503	545127
libDIA	O95926	O95926	SYF2	Pre-mRNA-splicing factor SYF2	O95926	SYF2_HUMAN	8073.96	7275	6527.09			dirDIA	P11021	P11021	HSPA5	78 kDa glucose-regulated protein	P11021	GRP78_HUMAN	452156	414663	358136
libDIA	O95983	O95983	MBD3	Methyl-CpG-binding domain protein 3	O95983	MBD3_HUMAN	Filtered	Filtered	4182.55			dirDIA	P11049	P11049	CD37	Leukocyte antigen CD37	P11049	CD37_HUMAN	60450.7	62382.6	47094
libDIA	O95989	O95989	NUDT3	Diphosphoinositol polyphosphate phosphohydrolase 1	O95989	NUDT3_HUMAN	3018.13	10540.5	9228.85			dirDIA	P11142	P11142	HSPA8	Heat shock cognate 71 kDa protein	P11142	HSP7C_HUMAN	1.37718e+06	1.2414e+06	1.21915e+06
libDIA	O95999	O95999	BCL10	B-cell lymphoma/leukemia 10	O95999	BCL10_HUMAN	5022.27	10928.1	11429.3			dirDIA	P11166	P11166	SLC2A1	Solute carrier family 2, facilitated glucose transporter member 1	P11166	GTR1_HUMAN	10567.6	15377	14243.5
libDIA	O96000	O96000	NDUFB10	NADH dehydrogenase [ubiquinone] 1 beta subcomplex subunit 10	O96000	NDUBA_HUMAN	24809.1	22203.5	24443.9			dirDIA	P11171	P11171	EPB41	Protein 4.1	P11171	41_HUMAN	8457.55	8237.15	7758.14
libDIA	O96005	O96005	CLPTM1	Cleft lip and palate transmembrane protein 1	O96005	CLPT1_HUMAN	18364.1	18753.5	5997.97			dirDIA	P11172	P11172	UMPS	Uridine 5'-monophosphate synthase	P11172	UMPS_HUMAN	17156.5	25957.1	26294
libDIA	O96008	O96008	TOMM40	Mitochondrial import receptor subunit TOM40 homolog	O96008	TOM40_HUMAN	18238.7	24133.4	24369.3			dirDIA	P11177	P11177	PDHB	Pyruvate dehydrogenase E1 component subunit beta, mitochondrial	P11177	ODPB_HUMAN	25351.9	26597	23538.2
libDIA	O96011	O96011	PEX11B	Peroxisomal membrane protein 11B	O96011	PX11B_HUMAN	3101.2	Filtered	2458.32			dirDIA	P11216	P11216	PYGB	Glycogen phosphorylase, brain form	P11216	PYGB_HUMAN	8037.47	10347.8	8769.86
libDIA	O96019	O96019	ACTL6A	Actin-like protein 6A	O96019	ACL6A_HUMAN	20239.7	17471.7	16359.7			dirDIA	P11226	P11226	MBL2	Mannose-binding protein C	P11226	MBL2_HUMAN	14090.5	3051.57	1608.01
libDIA	O96028	O96028	WHSC1	Histone-lysine N-methyltransferase NSD2	O96028	NSD2_HUMAN	4249.18	3529.96	4515.22			dirDIA	P11233	P11233	RALA	Ras-related protein Ral-A	P11233	RALA_HUMAN	19702.6	15628.2	17067.4
libDIA	P00167	P00167	CYB5A	Cytochrome b5	P00167	CYB5_HUMAN	19629	13460.8	17770.4			dirDIA	P11279	P11279	LAMP1	Lysosome-associated membrane glycoprotein 1	P11279	LAMP1_HUMAN	107667	72211.7	76339.6
libDIA	P00338	P00338	LDHA	L-lactate dehydrogenase A chain	P00338	LDHA_HUMAN	1.67339e+06	1.29057e+06	1.38305e+06			dirDIA	P11310	P11310	ACADM	Medium-chain specific acyl-CoA dehydrogenase, mitochondrial	P11310	ACADM_HUMAN	50662	78475.3	62917.1
libDIA	P00367	P00367	GLUD1	Glutamate dehydrogenase 1, mitochondrial	P00367	DHE3_HUMAN	11269.1	9704.57	10816.2			dirDIA	P11387	P11387	TOP1	DNA topoisomerase 1	P11387	TOP1_HUMAN	119085	117269	112143
libDIA	P00374	P00374	DHFR	Dihydrofolate reductase	P00374	DYR_HUMAN	32306.7	24091.8	26254.4			dirDIA	P11388	P11388	TOP2A	DNA topoisomerase 2-alpha	P11388	TOP2A_HUMAN	89432.1	114230	102928
libDIA	P00387	P00387	CYB5R3	NADH-cytochrome b5 reductase 3	P00387	NB5R3_HUMAN	27049.3	29402.5	26240.4			dirDIA	P11413	P11413	G6PD	Glucose-6-phosphate 1-dehydrogenase	P11413	G6PD_HUMAN	26165.6	24072.7	22352.6
libDIA	P00390	P00390	GSR	Glutathione reductase, mitochondrial	P00390	GSHR_HUMAN	21719.4	26385.8	26033			dirDIA	P11441	P11441	UBL4A	Ubiquitin-like protein 4A	P11441	UBL4A_HUMAN	18861	10475.1	9361.93
libDIA	P00403	P00403	MT-CO2	Cytochrome c oxidase subunit 2	P00403	COX2_HUMAN	211880	189934	154164			dirDIA	P11586	P11586	MTHFD1	C-1-tetrahydrofolate synthase, cytoplasmic	P11586	C1TC_HUMAN	224188	213292	206962
libDIA	P00441	P00441	SOD1	Superoxide dismutase [Cu-Zn]	P00441	SODC_HUMAN	36026.6	35026.1	41184.4			dirDIA	P11766	P11766	ADH5	Alcohol dehydrogenase class-3	P11766	ADHX_HUMAN	28232.1	29477	29421.9
libDIA	P00491	P00491	PNP	Purine nucleoside phosphorylase	P00491	PNPH_HUMAN	42916.6	55046.6	62875.6			dirDIA	P11802	P11802	CDK4	Cyclin-dependent kinase 4	P11802	CDK4_HUMAN	3278.42	7269.28	6876.57
libDIA	P00492	P00492	HPRT1	Hypoxanthine-guanine phosphoribosyltransferase	P00492	HPRT_HUMAN	43380.6	40904	37613.1			dirDIA	P11836	P11836	MS4A1	B-lymphocyte antigen CD20	P11836	CD20_HUMAN	113109	78662.3	76860.8
libDIA	P00505	P00505	GOT2	Aspartate aminotransferase, mitochondrial	P00505	AATM_HUMAN	86474.8	53357.2	45565.8			dirDIA	P11908	P11908	PRPS2	Ribose-phosphate pyrophosphokinase 2	P11908	PRPS2_HUMAN	11478.2	16488.6	16465.8
libDIA	P00519	P00519	ABL1	Tyrosine-protein kinase ABL1	P00519	ABL1_HUMAN	173960	200088	192317			dirDIA	P11940	P11940	PABPC1	Polyadenylate-binding protein 1	P11940	PABP1_HUMAN	199092	297717	304131
libDIA	P00558	P00558	PGK1	Phosphoglycerate kinase 1	P00558	PGK1_HUMAN	324247	410926	429570			dirDIA	P12004	P12004	PCNA	Proliferating cell nuclear antigen	P12004	PCNA_HUMAN	177919	126351	157531
libDIA	P00846	P00846	MT-ATP6	ATP synthase subunit a	P00846	ATP6_HUMAN	Filtered	4921.19	9444.92			dirDIA	P12081	P12081	HARS	Histidine--tRNA ligase, cytoplasmic	P12081	SYHC_HUMAN	42082.4	53743.4	51143.1
libDIA	P01023	P01023	A2M	Alpha-2-macroglobulin	P01023	A2MG_HUMAN	Filtered	6706.55	5337.48			dirDIA	P12235	P12235	SLC25A4	ADP/ATP translocase 1	P12235	ADT1_HUMAN	24646.7	21926.4	17592
libDIA	P01111	P01111	NRAS	GTPase NRas	P01111	RASN_HUMAN	26259.2	26254.4	24687.9			dirDIA	P12236	P12236	SLC25A6	ADP/ATP translocase 3	P12236	ADT3_HUMAN	302207	334716	245190
libDIA	P01137	P01137	TGFB1	Transforming growth factor beta-1	P01137	TGFB1_HUMAN	26434.6	46093.7	32307.9			dirDIA	P12268	P12268	IMPDH2	Inosine-5'-monophosphate dehydrogenase 2	P12268	IMDH2_HUMAN	225632	241465	249071
libDIA	P01591	P01591	JCHAIN	Immunoglobulin J chain	P01591	IGJ_HUMAN	59822.1	41851	30497			dirDIA	P12270	P12270	TPR	Nucleoprotein TPR	P12270	TPR_HUMAN	25477.3	33882.5	31279.8
libDIA	P01625	P01625		Ig kappa chain V-IV region Len	P01625	KV402_HUMAN	103515	124163	95217			dirDIA	P12524;P12525	P12524;P12525	MYCL;MYCLP1	Protein L-Myc;Putative myc-like protein MYCLP1	P12524;P12525	MYCL_HUMAN;MYCP1_HUMAN	1.05177e+06	570092	480943
libDIA	P01834	P01834	IGKC	Ig kappa chain C region	P01834	IGKC_HUMAN	52588.8	47589.7	42157.7			dirDIA	P12694	P12694	BCKDHA	2-oxoisovalerate dehydrogenase subunit alpha, mitochondrial	P12694	ODBA_HUMAN	3235.88	6862.35	5568.81
[truncated: 3,493 more rows]
